# Supplementary material
Source: ML conference proceedings conference paper supplement (https://proceedings.neurips.cc/paper_files/paper/2018/hash/82161242827b703e6acf9c726942a1e4-Abstract.html)

---

# Supplementary Material for Cooperative Holistic Scene Understanding: Unifying 3D Object, Layout, and Camera Pose Estimation

---

Siyuan Huang <sup>1</sup>  
huangsiyuan@ucla.edu

Siyuan Qi <sup>2</sup>  
syqi@cs.ucla.edu

Yinxue Xiao <sup>2</sup>  
yinxuex@ucla.edu

Yixin Zhu <sup>1</sup>  
yixin.zhu@ucla.edu

Ying Nian Wu <sup>1</sup>  
ywu@stat.ucla.edu

Song-Chun Zhu <sup>1,2</sup>  
sczhu@stat.ucla.edu

<sup>1</sup> Dept. of Statistics, UCLA    <sup>2</sup> Dept. of Computer Science, UCLA

## 3D Object Detection

We report results of 3D object detection of 30 object categories in Table 1.

Table 1: Comparisons of 3D object detection on SUN RGB-D.

|        |             |             |             |        |            |          |        |       |           |              |
|--------|-------------|-------------|-------------|--------|------------|----------|--------|-------|-----------|--------------|
| toilet | recycle_bin | night_stand | endtable    | drawer | computer   | keyboard | table  | chair | monitor   | stool        |
| 58.55  | 10.19       | 6.34        | 8.88        | 4.39   | 0.83       | 0.58     | 26.21  | 17.12 | 0.26      | 6.25         |
| lamp   | dresser     | picture     | garbage_bin | shelf  | sofa_chair | cabinet  | sink   | desk  | bookshelf | coffee_table |
| 1.75   | 4.28        | 0           | 7.54        | 3.01   | 32.34      | 2.63     | 5.34   | 9.55  | 2.37      | 11.42        |
| box    | sofa        | whiteboard  | bed         | cpu    | paper      | painting | pillow | mAP   |           |              |
| 1.24   | 41.22       | 0.38        | 63.58       | 3.70   | 0          | 0        | 2.24   | 11.07 |           |              |

## 3D Box Estimation

We report results of 3D IoU and 2D IoU of 30 object categories in Table 2.

Table 2: 3D box estimation results on SUN RGB-D.

|          |              |             |             |            |             |          |            |          |        |         |           |
|----------|--------------|-------------|-------------|------------|-------------|----------|------------|----------|--------|---------|-----------|
|          | toilet       | recycle_bin | night_stand | endtable   | drawer      | computer | keyboard   | table    | chair  | monitor |           |
| IoU (3D) | 25.08        | 13.17       | 12.50       | 16.24      | 15.78       | 5.21     | 2.89       | 20.77    | 15.66  | 5.36    |           |
| IoU (2D) | 72.53        | 69.69       | 69.38       | 74.58      | 64.13       | 67.80    | 58.20      | 71.20    | 68.10  | 60.84   |           |
|          | stool        | lamp        | dresser     | picture    | garbage_bin | shelf    | sofa_chair | cabinet  | sink   | desk    | bookshelf |
|          | 9.17         | 5.88        | 9.29        | 1.03       | 10.13       | 6.90     | 24.03      | 10.07    | 9.87   | 15.64   | 7.10      |
|          | 74.52        | 63.80       | 69.28       | 51.96      | 67.66       | 62.14    | 75.05      | 69.09    | 59.34  | 70.10   | 59.22     |
|          | coffee_table | box         | sofa        | whiteboard | bed         | cpu      | paper      | painting | pillow | mIoU    |           |
|          | 23.82        | 4.88        | 27.92       | 2.36       | 33.12       | 8.99     | 0.09       | 0.47     | 5.18   | 11.62   |           |
|          | 75.27        | 60.85       | 74.45       | 63.20      | 75.74       | 65.09    | 60.54      | 61.71    | 62.98  | 66.6    |           |

## More Results

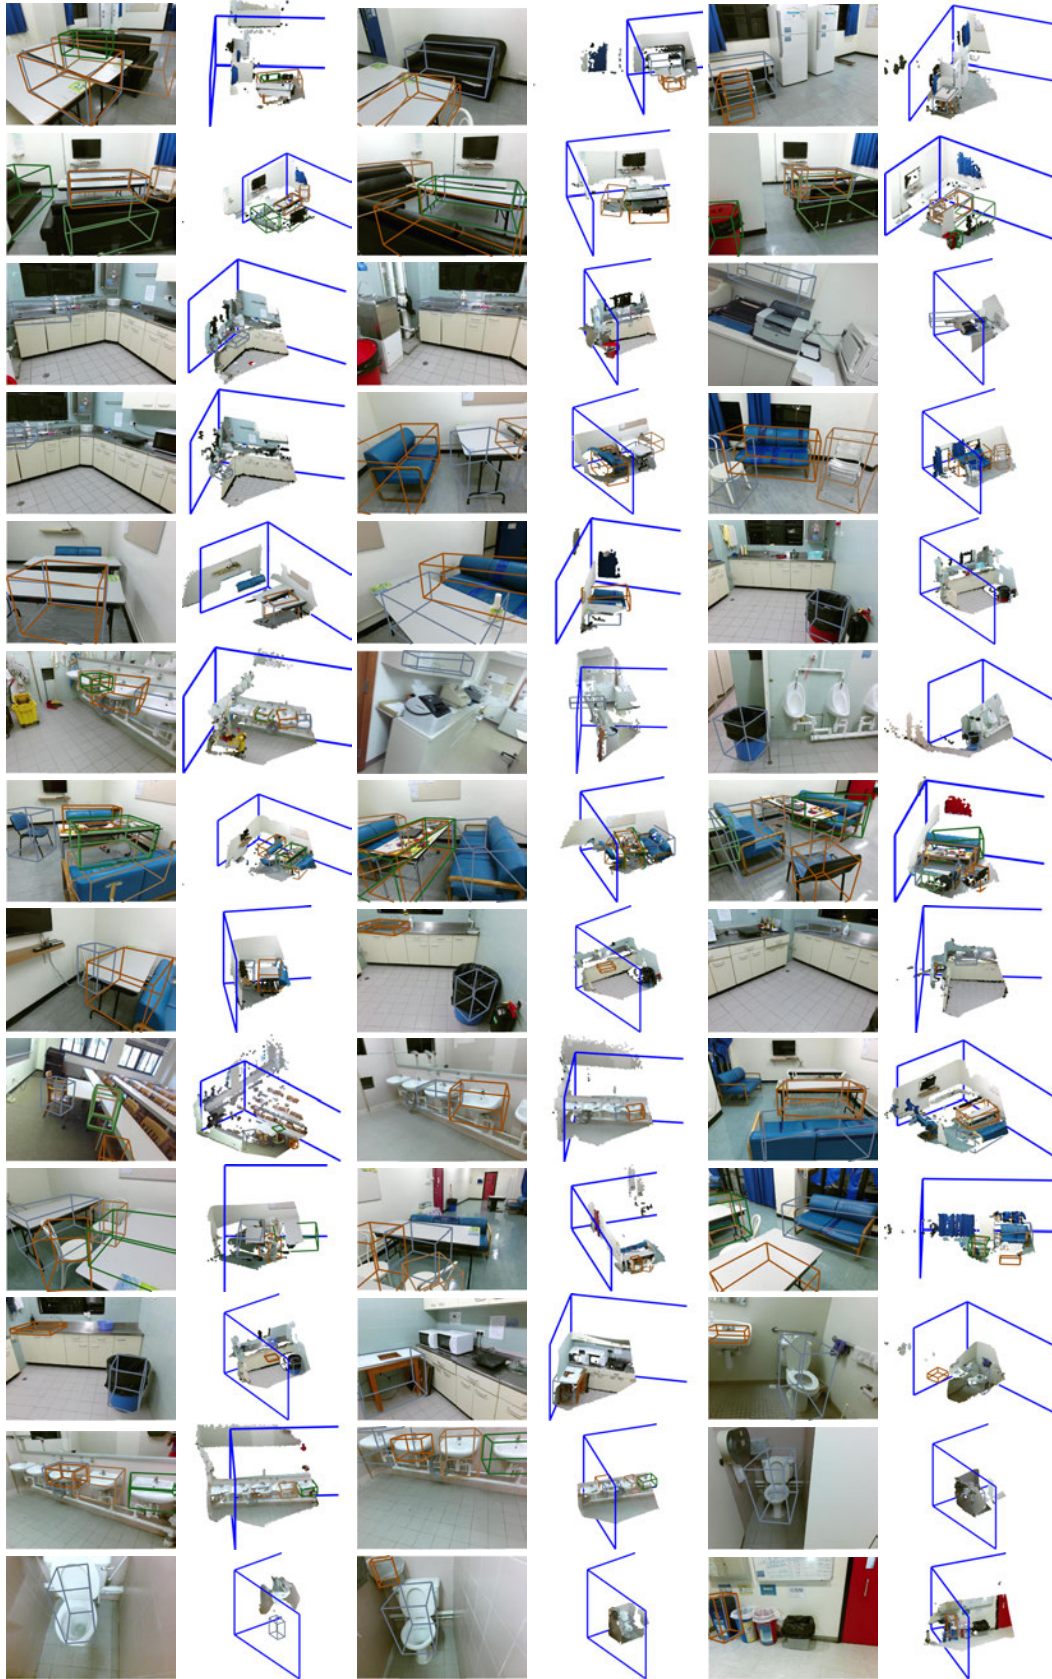

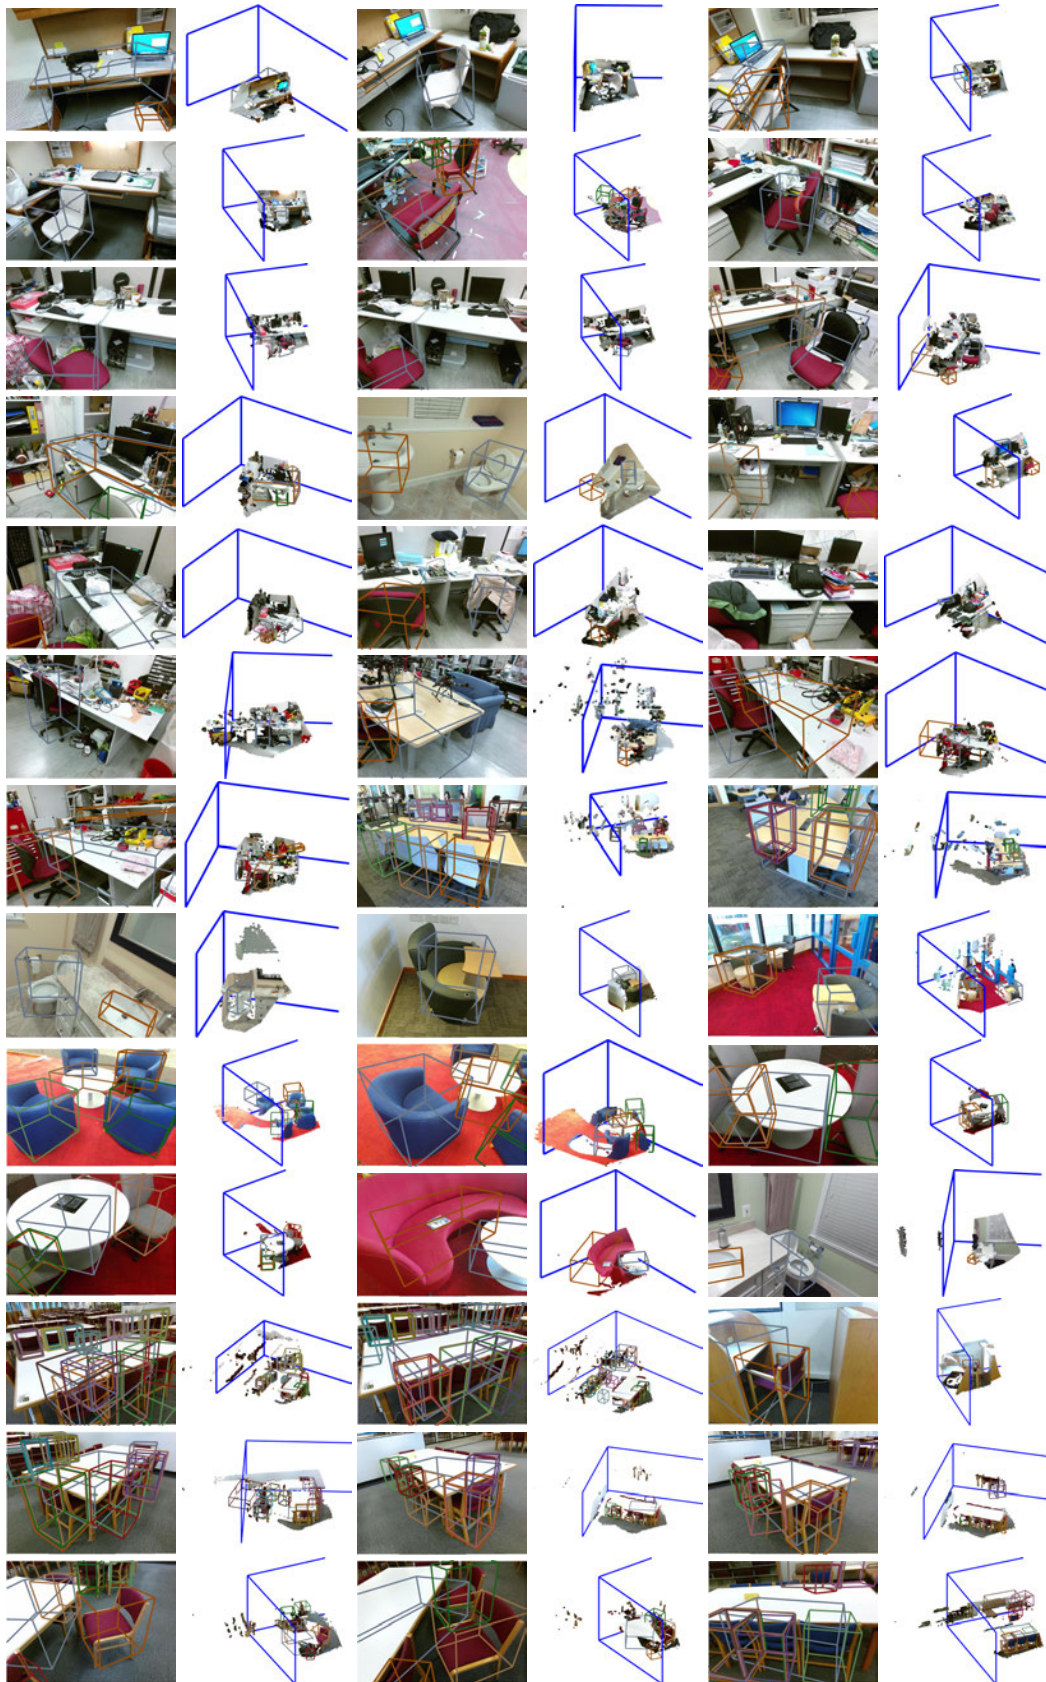

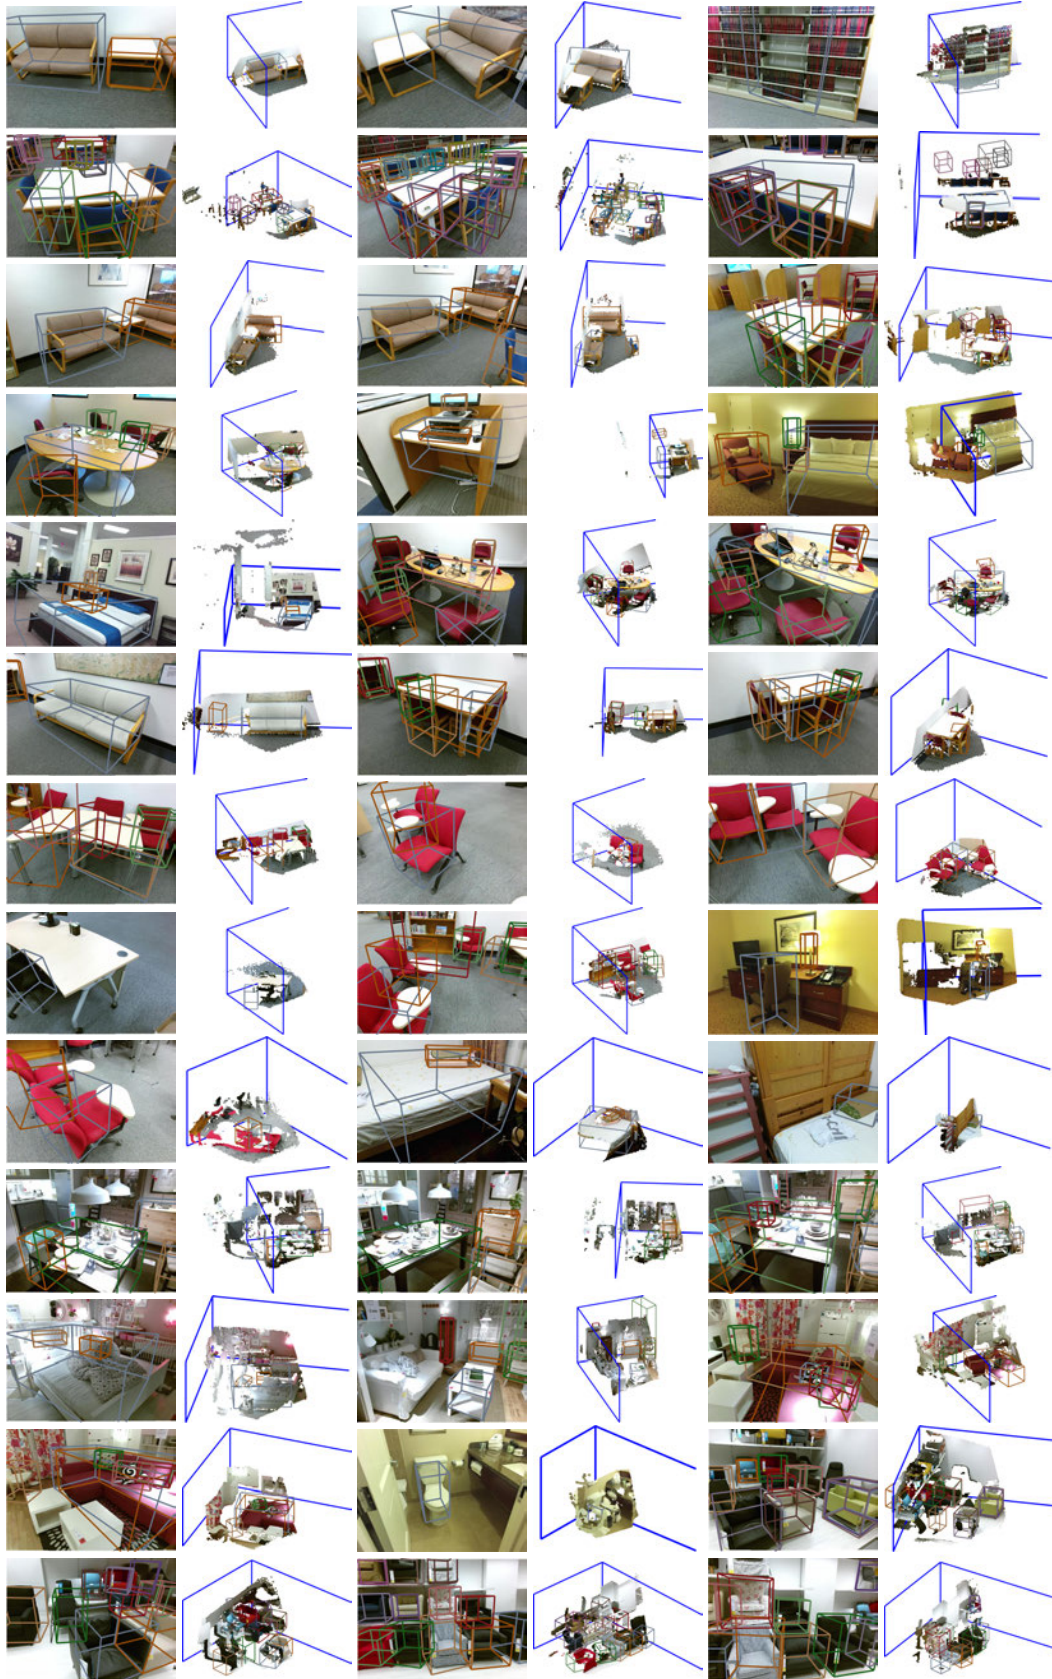

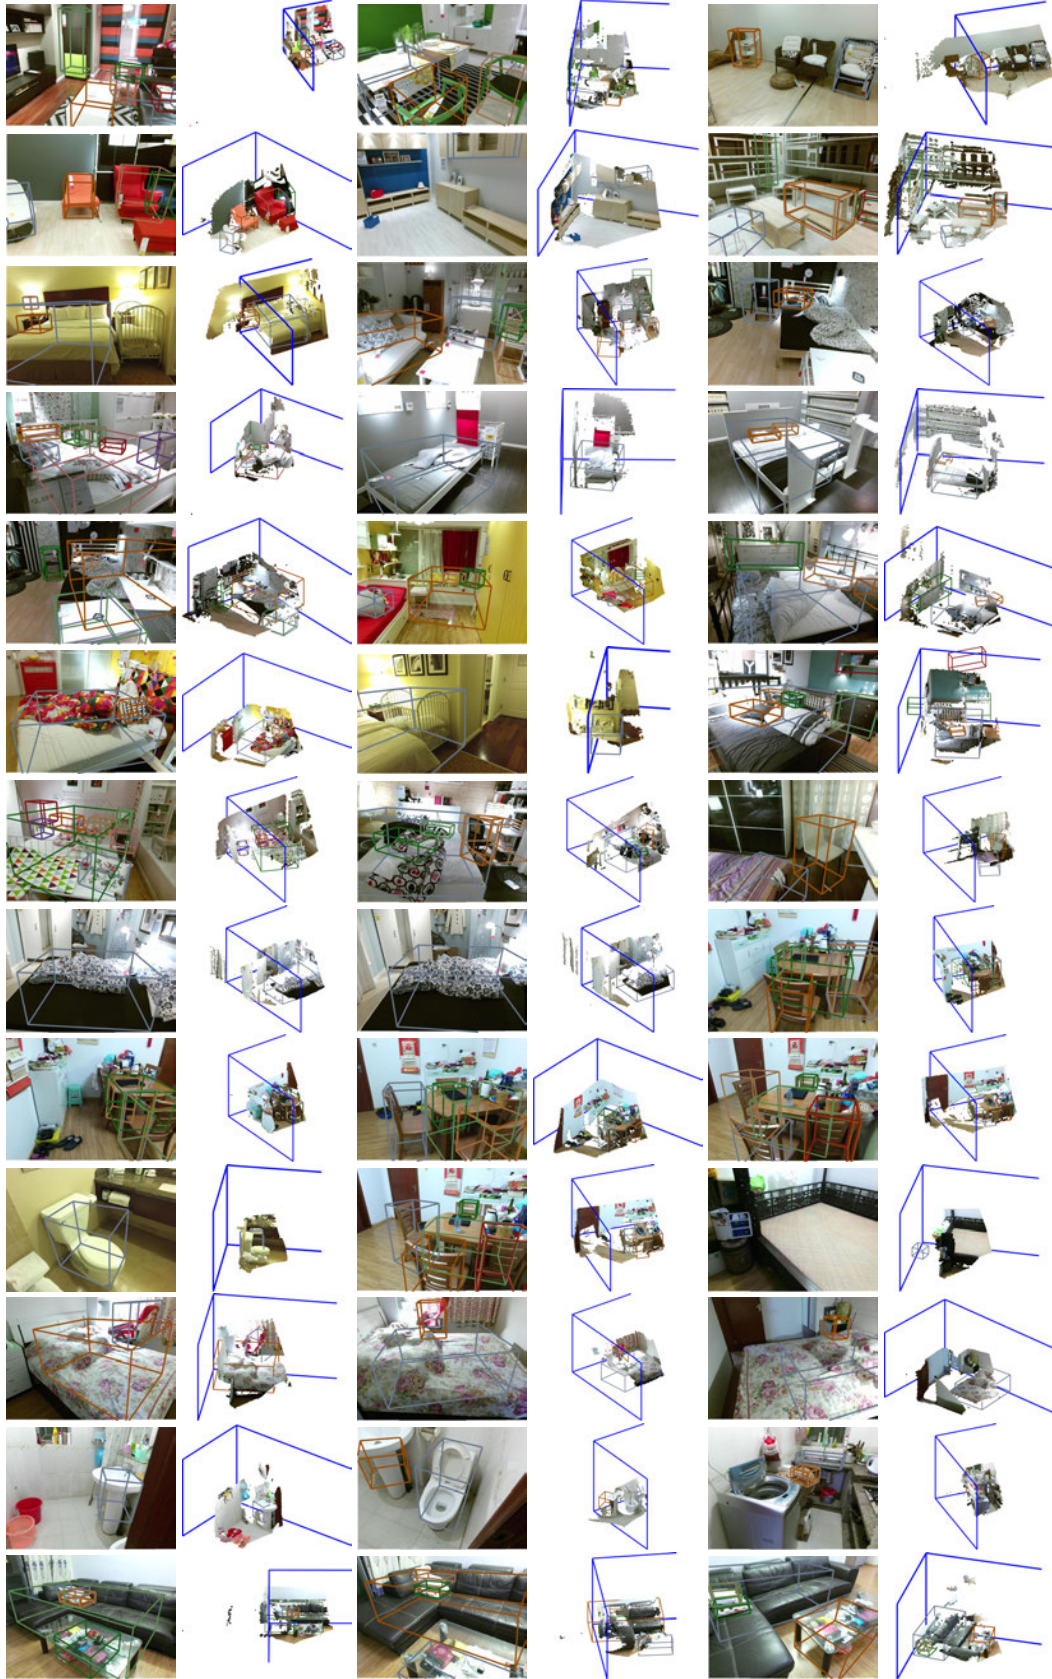

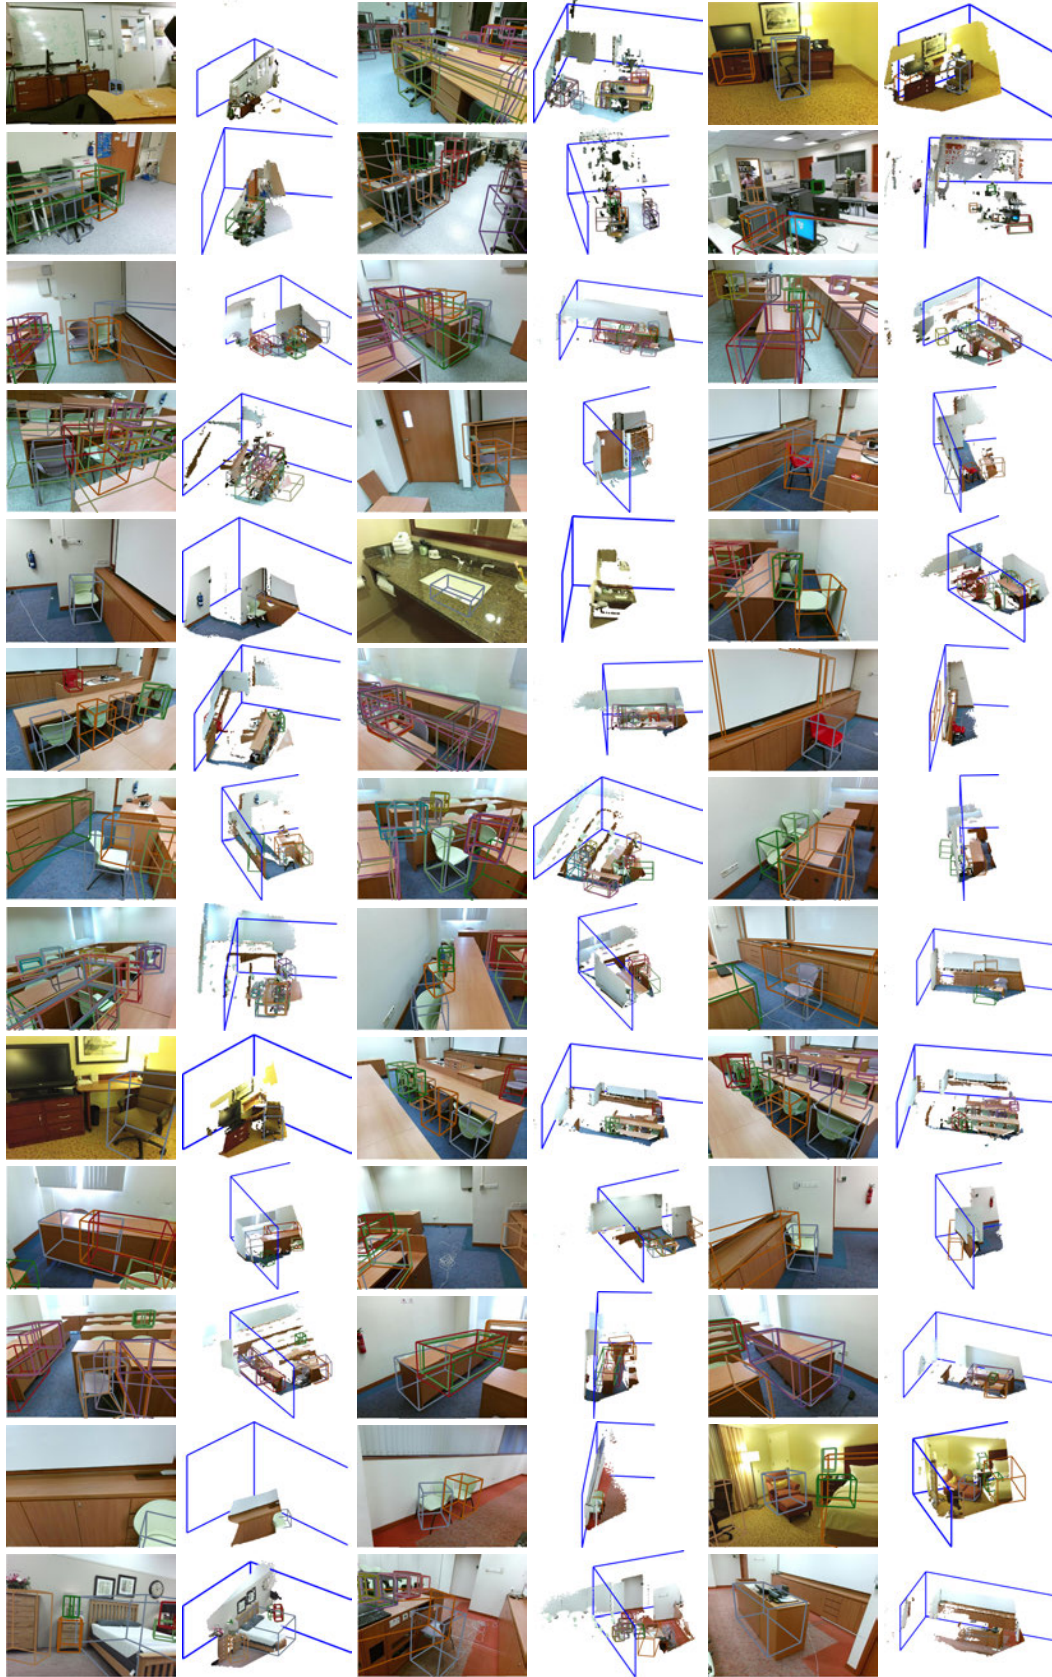

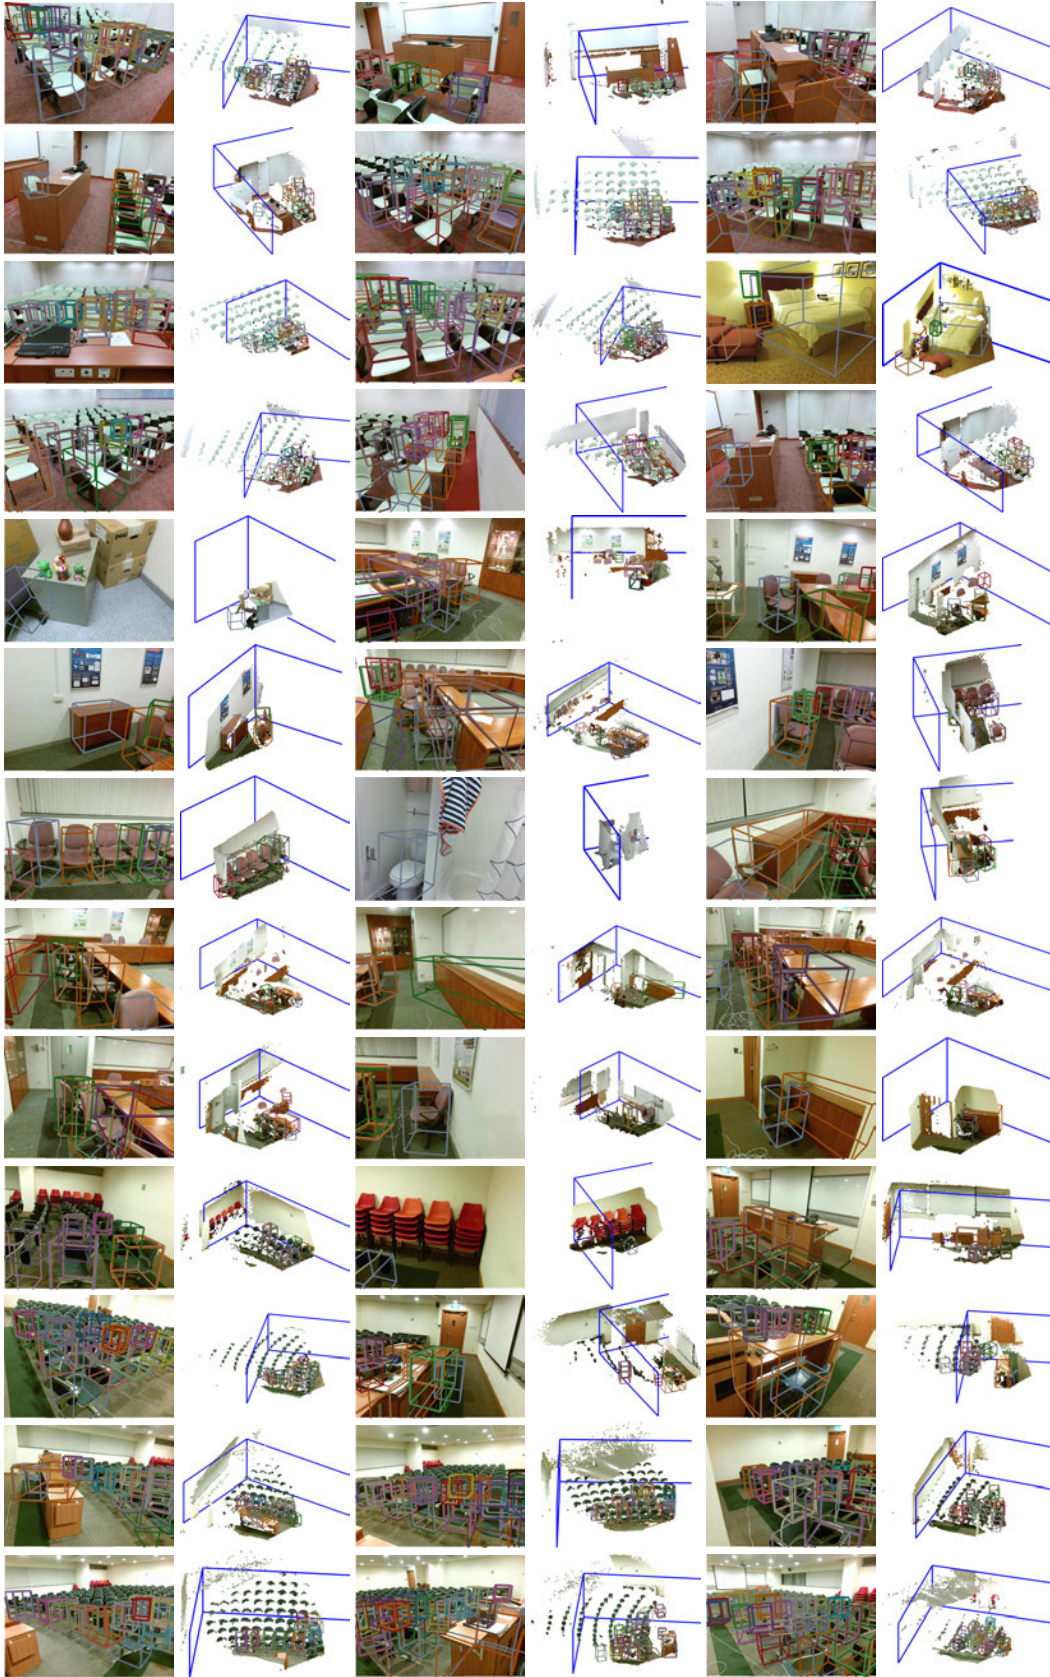

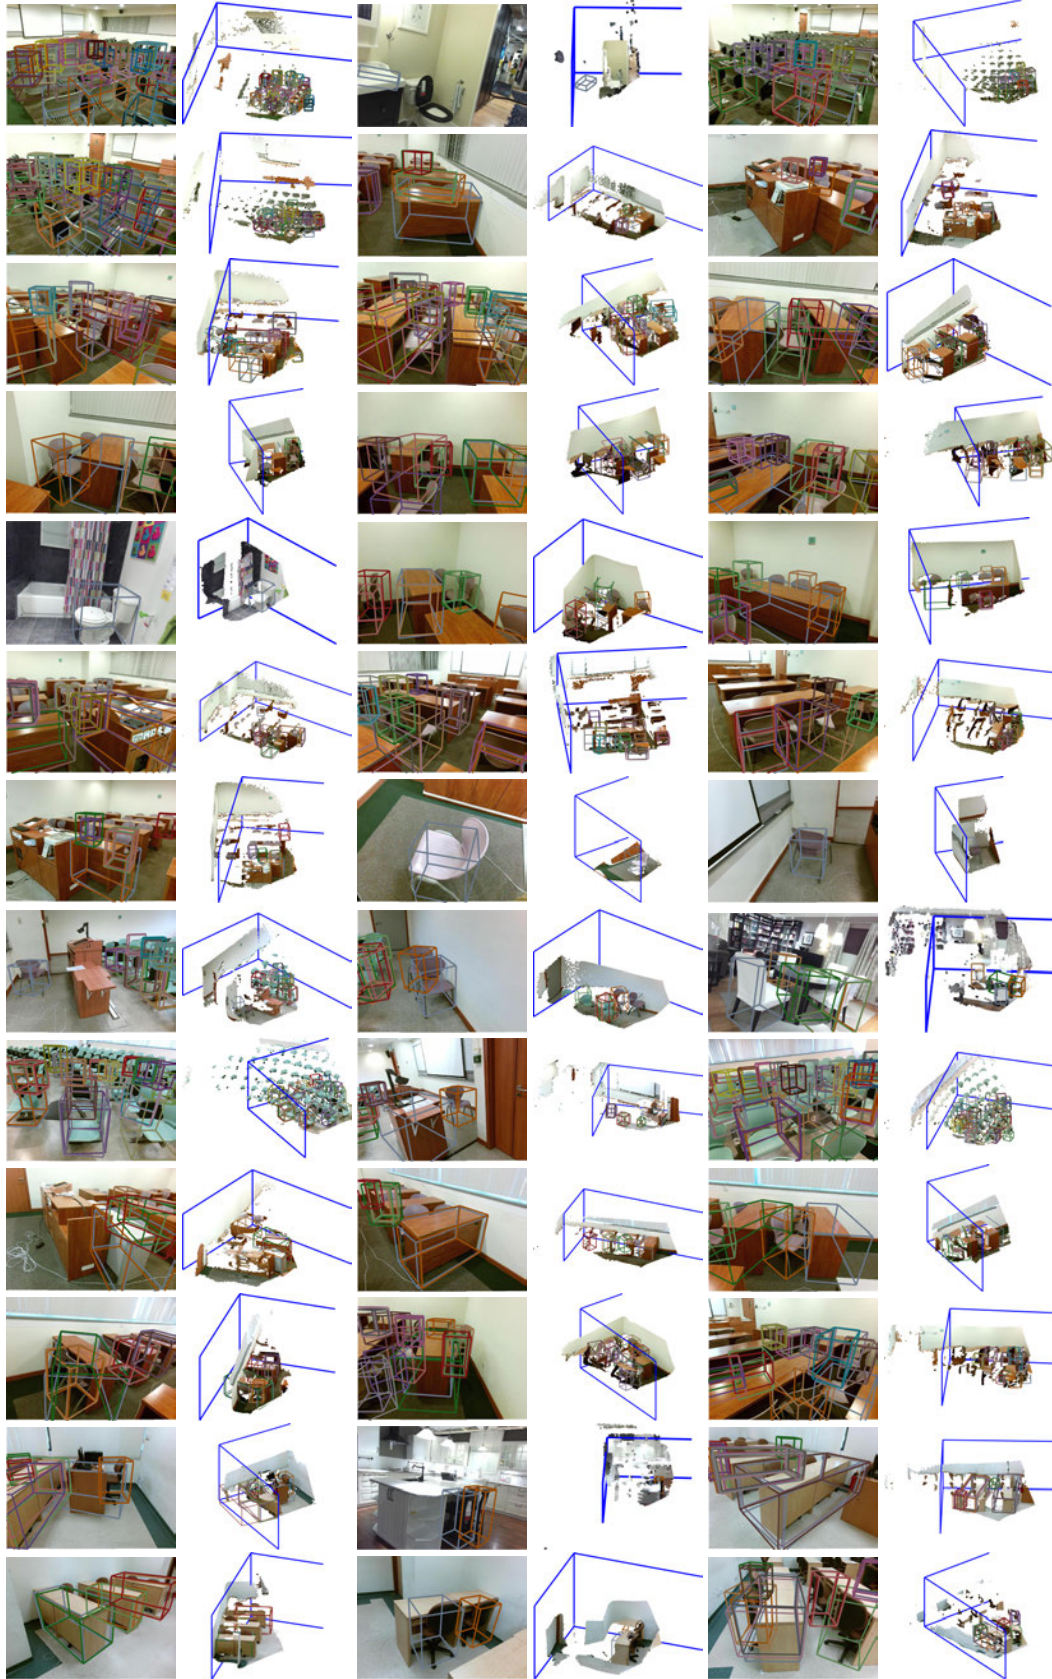



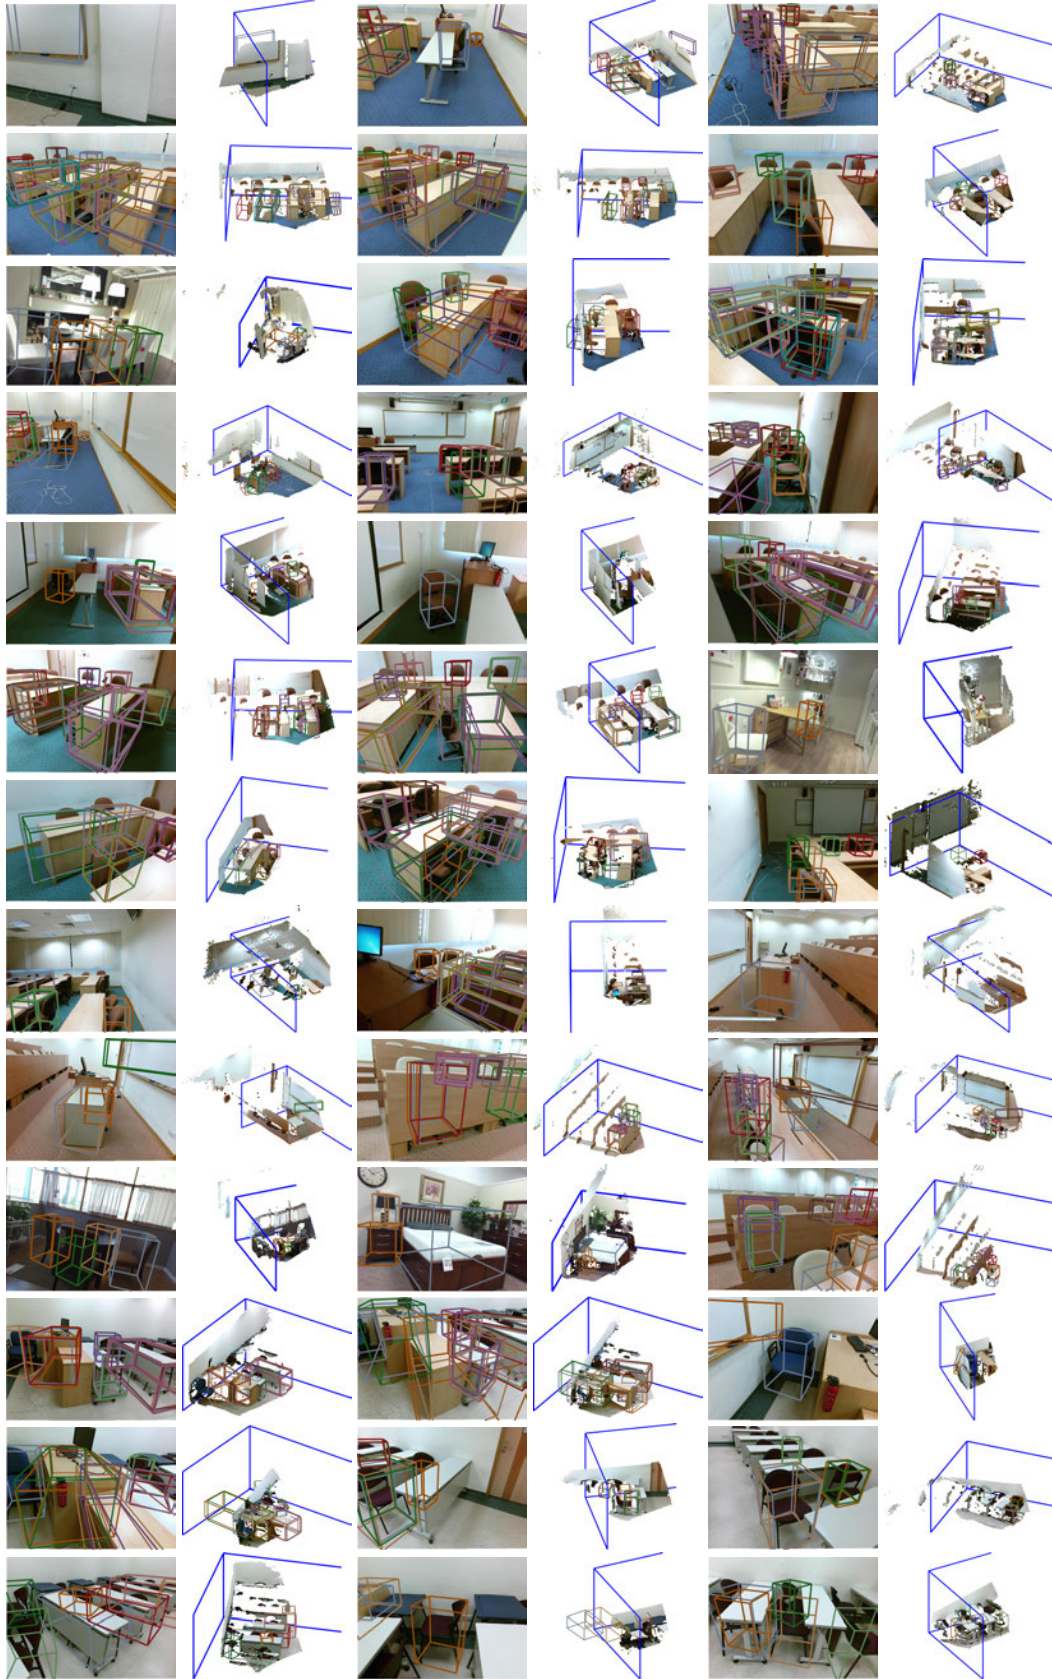

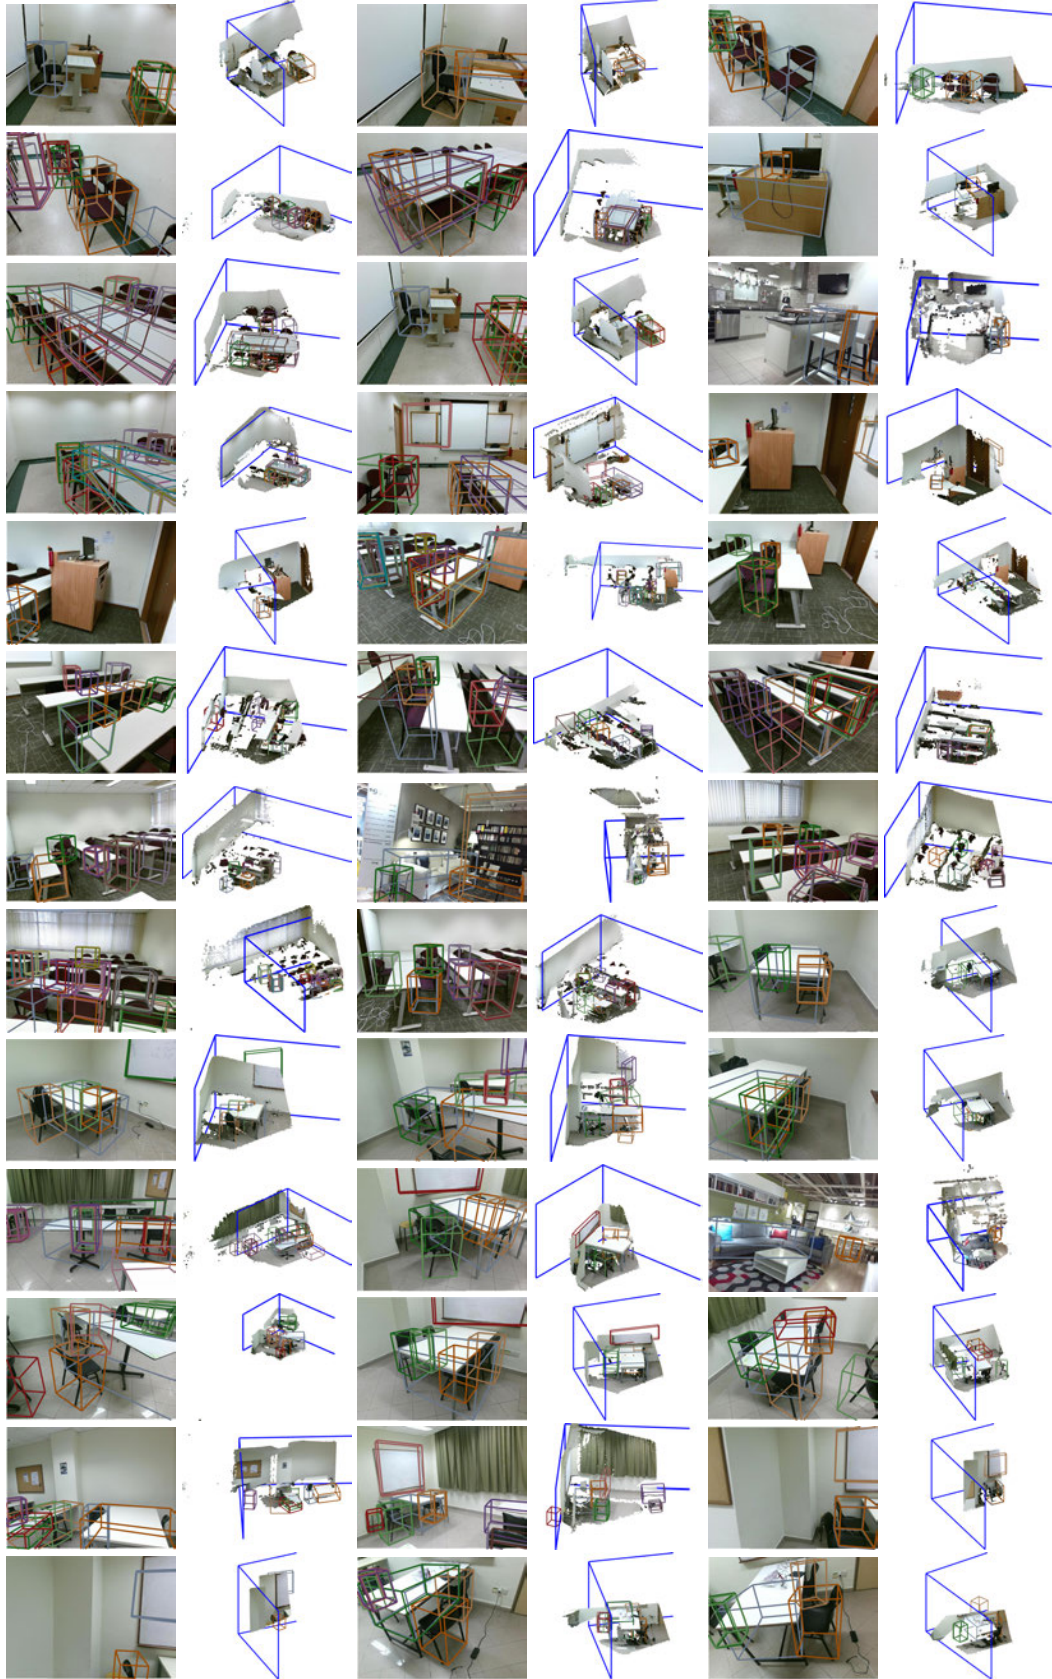

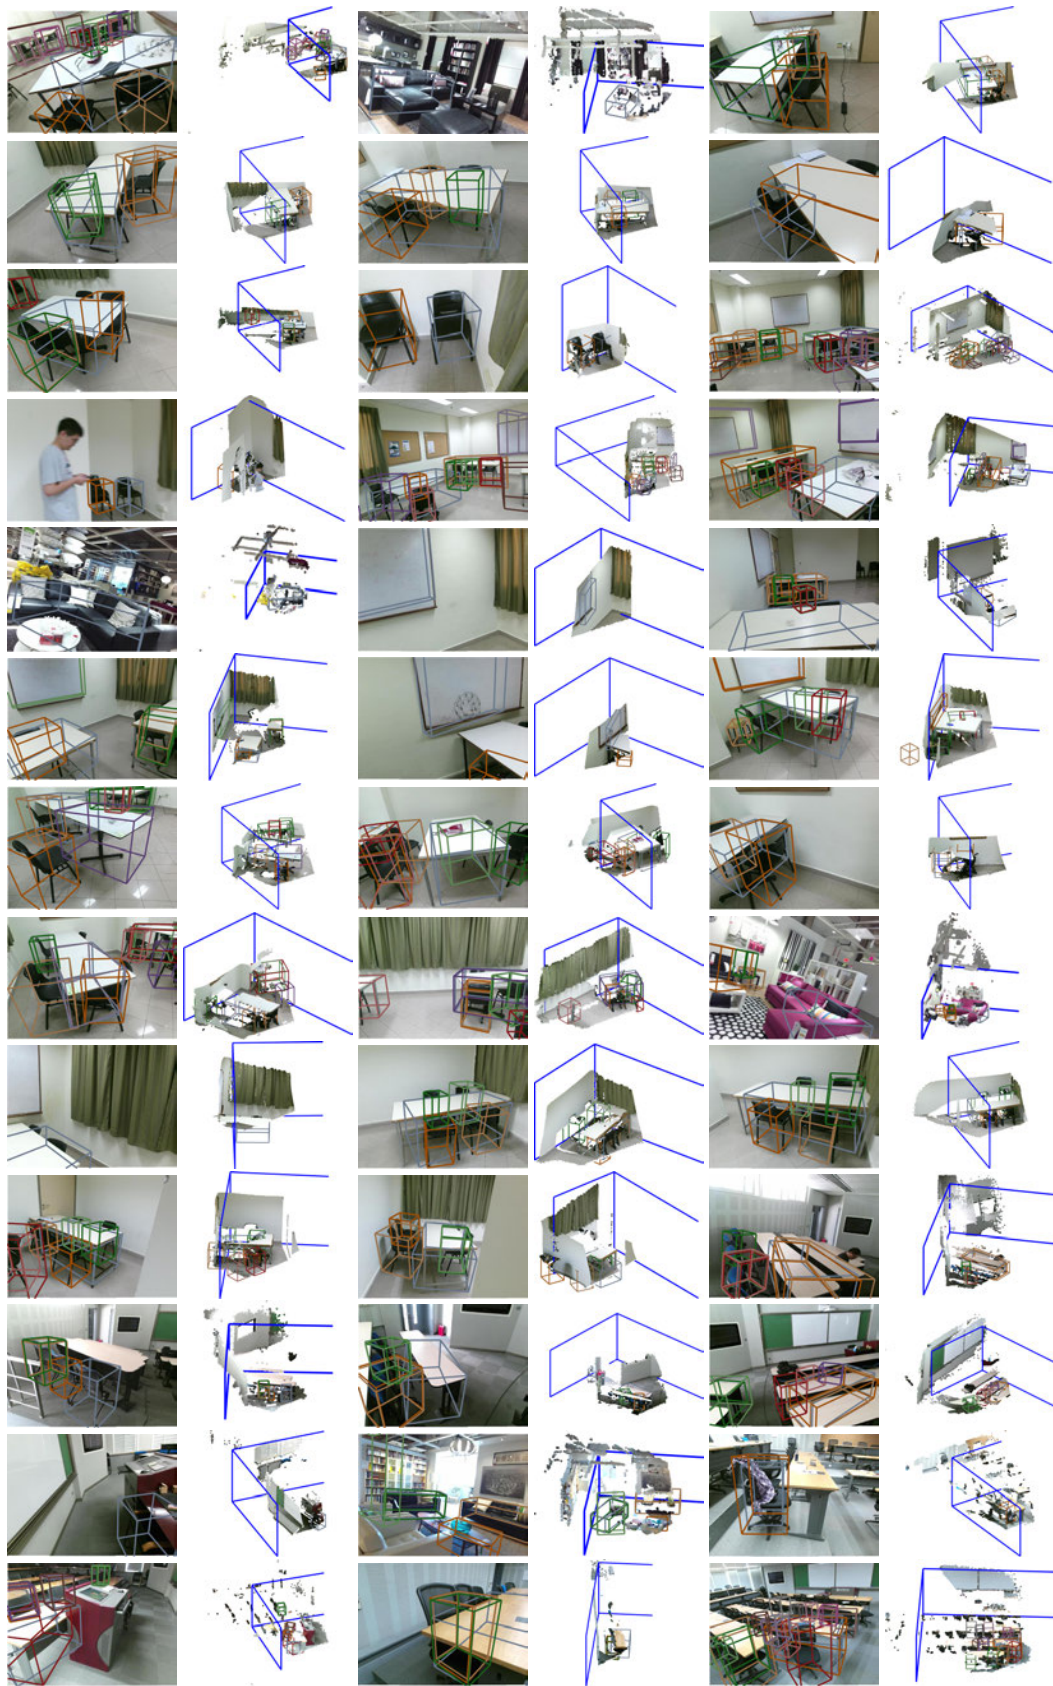

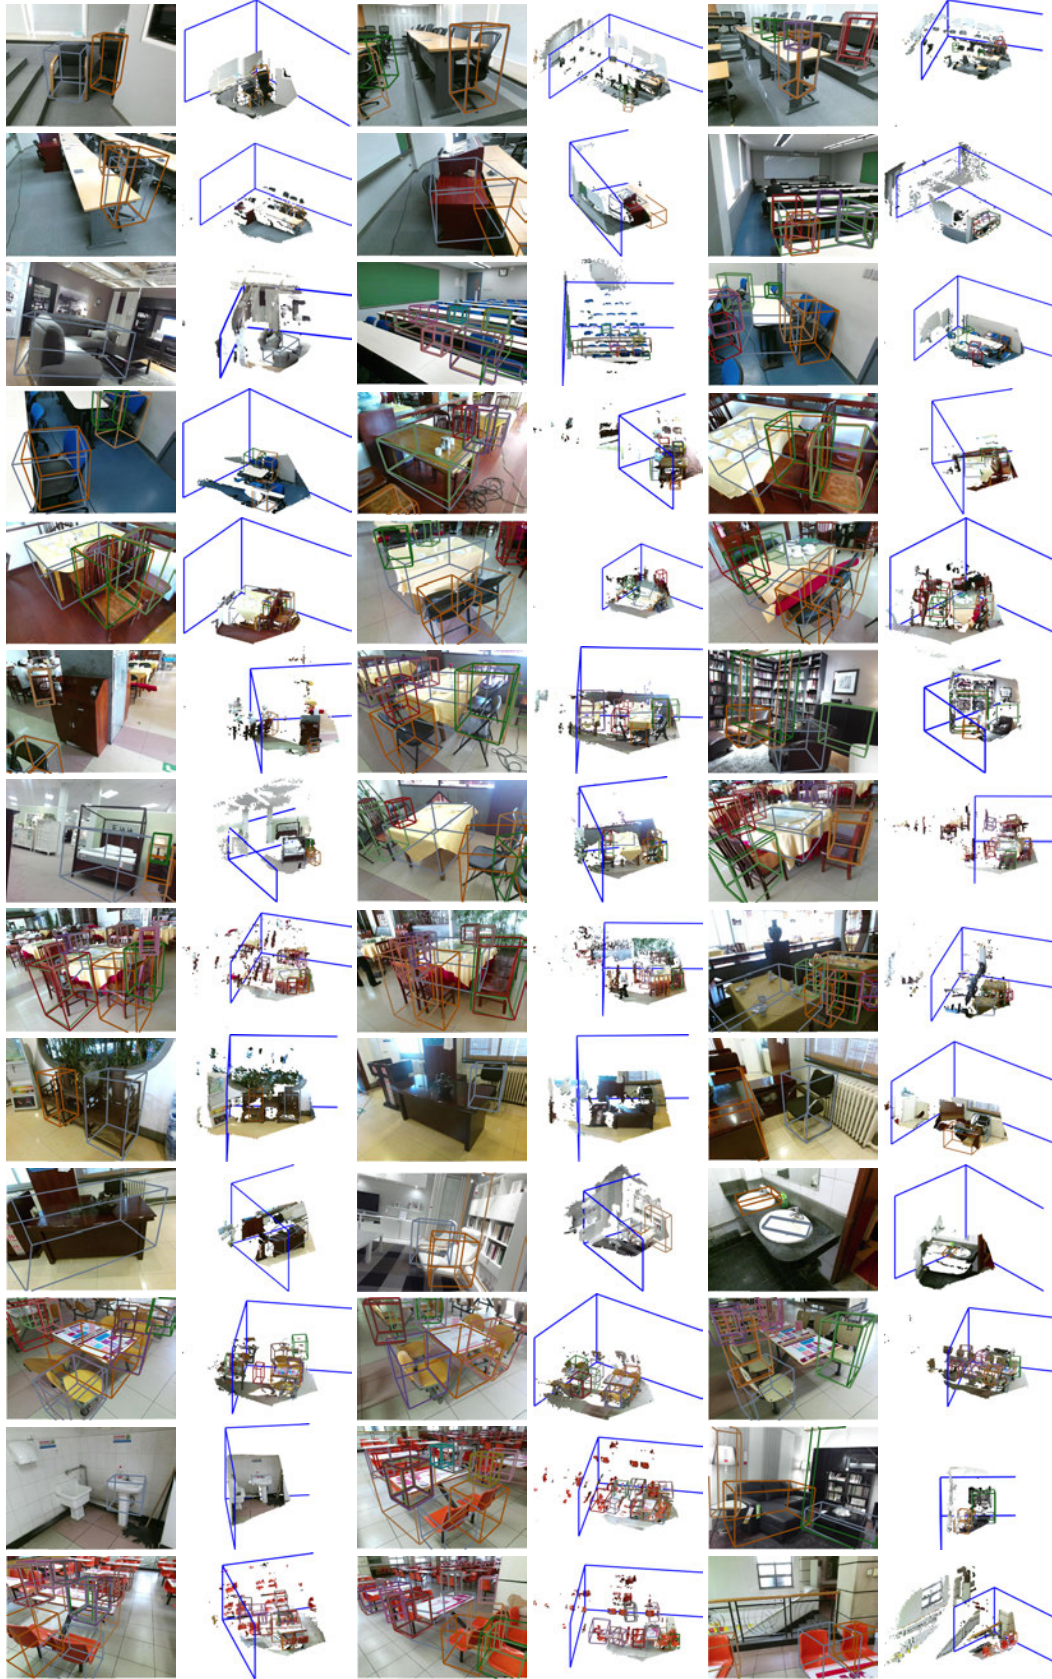

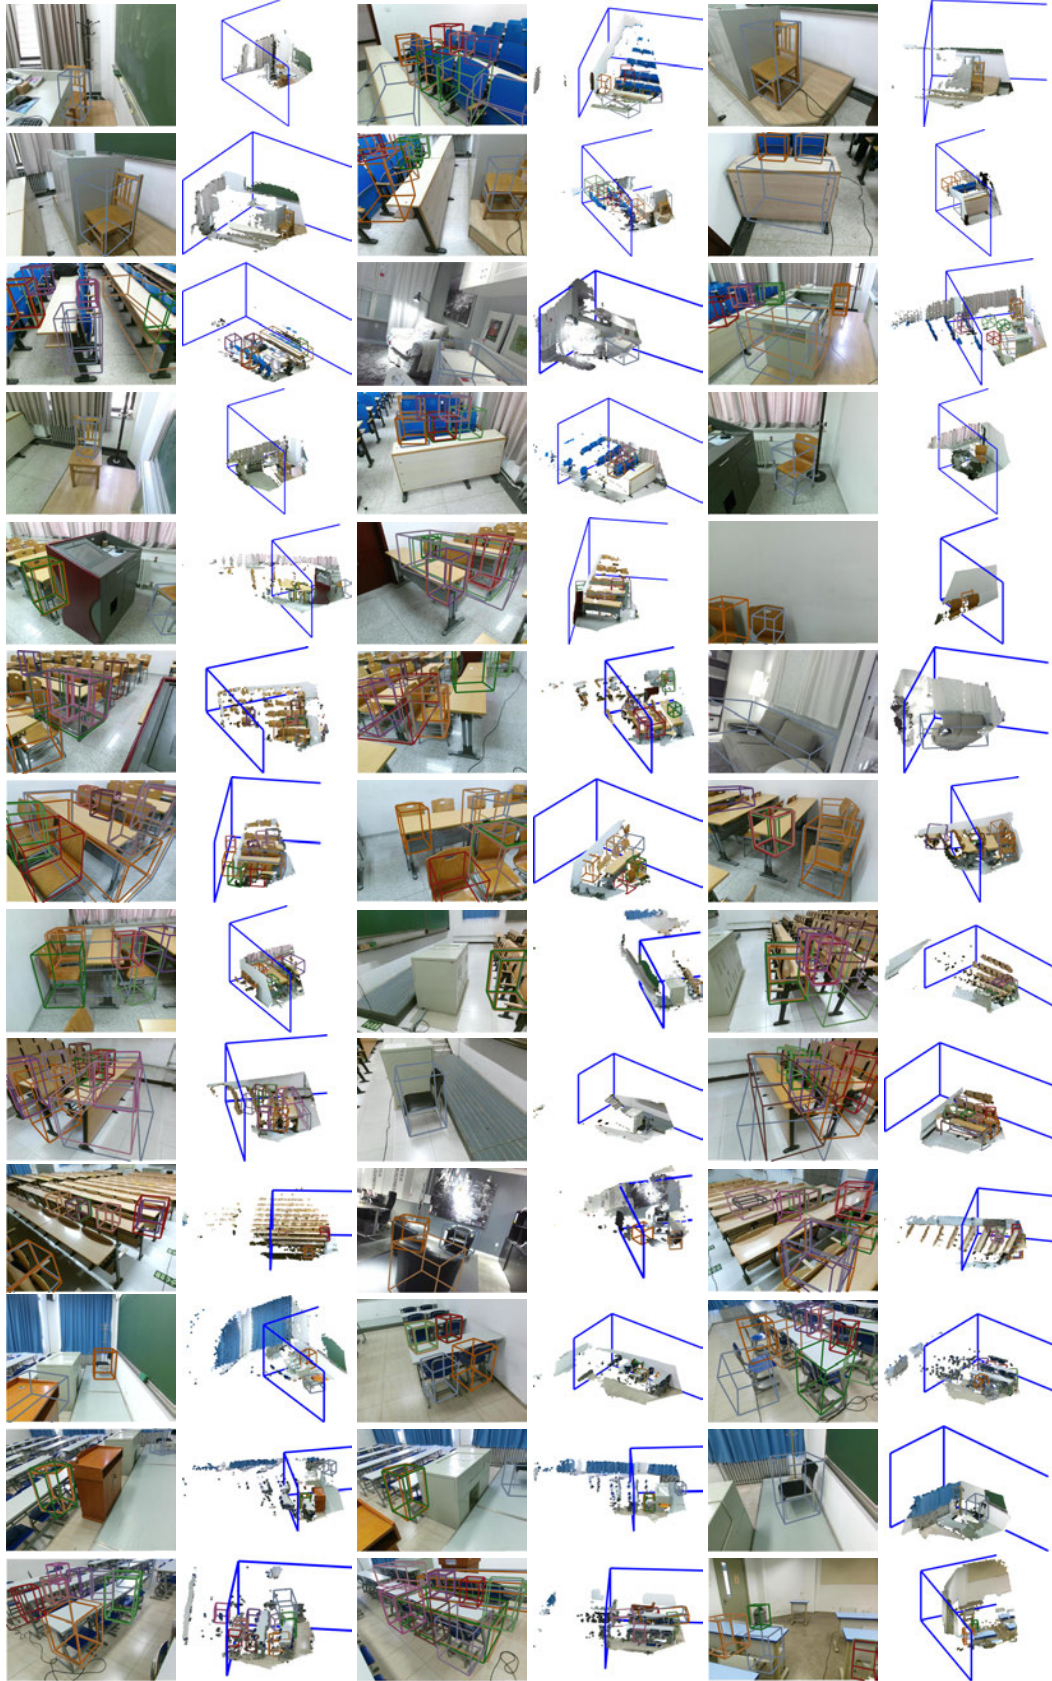

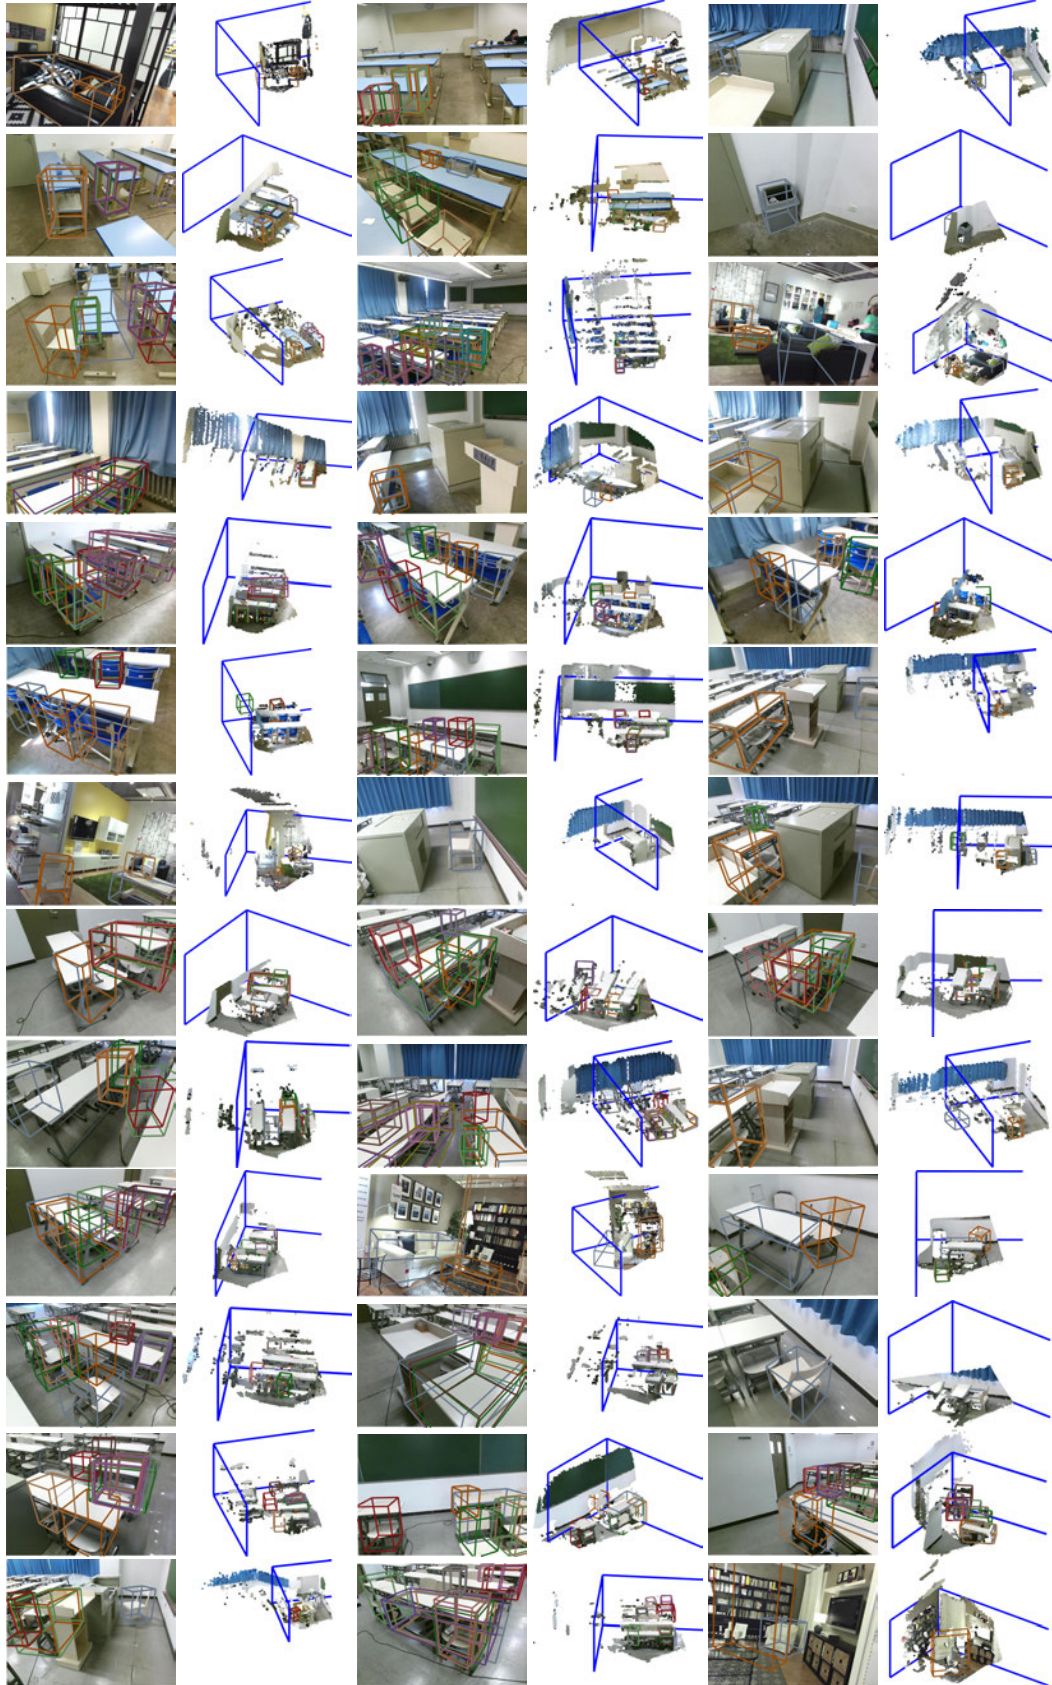

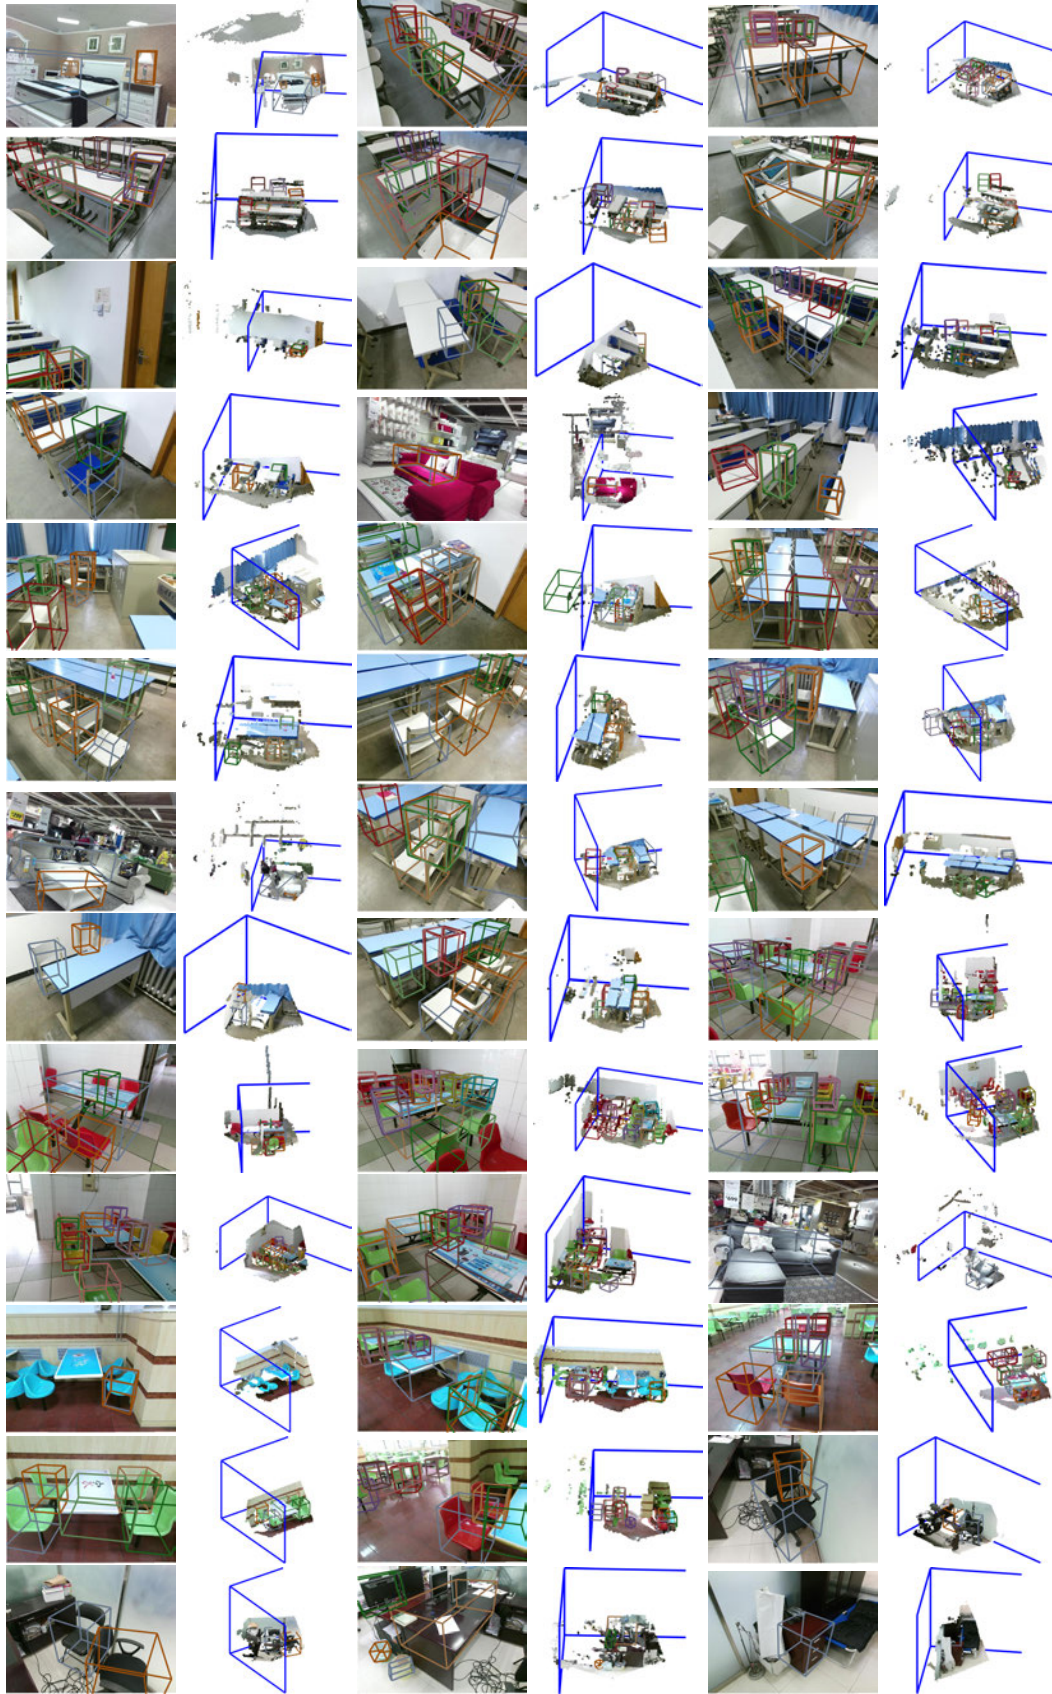

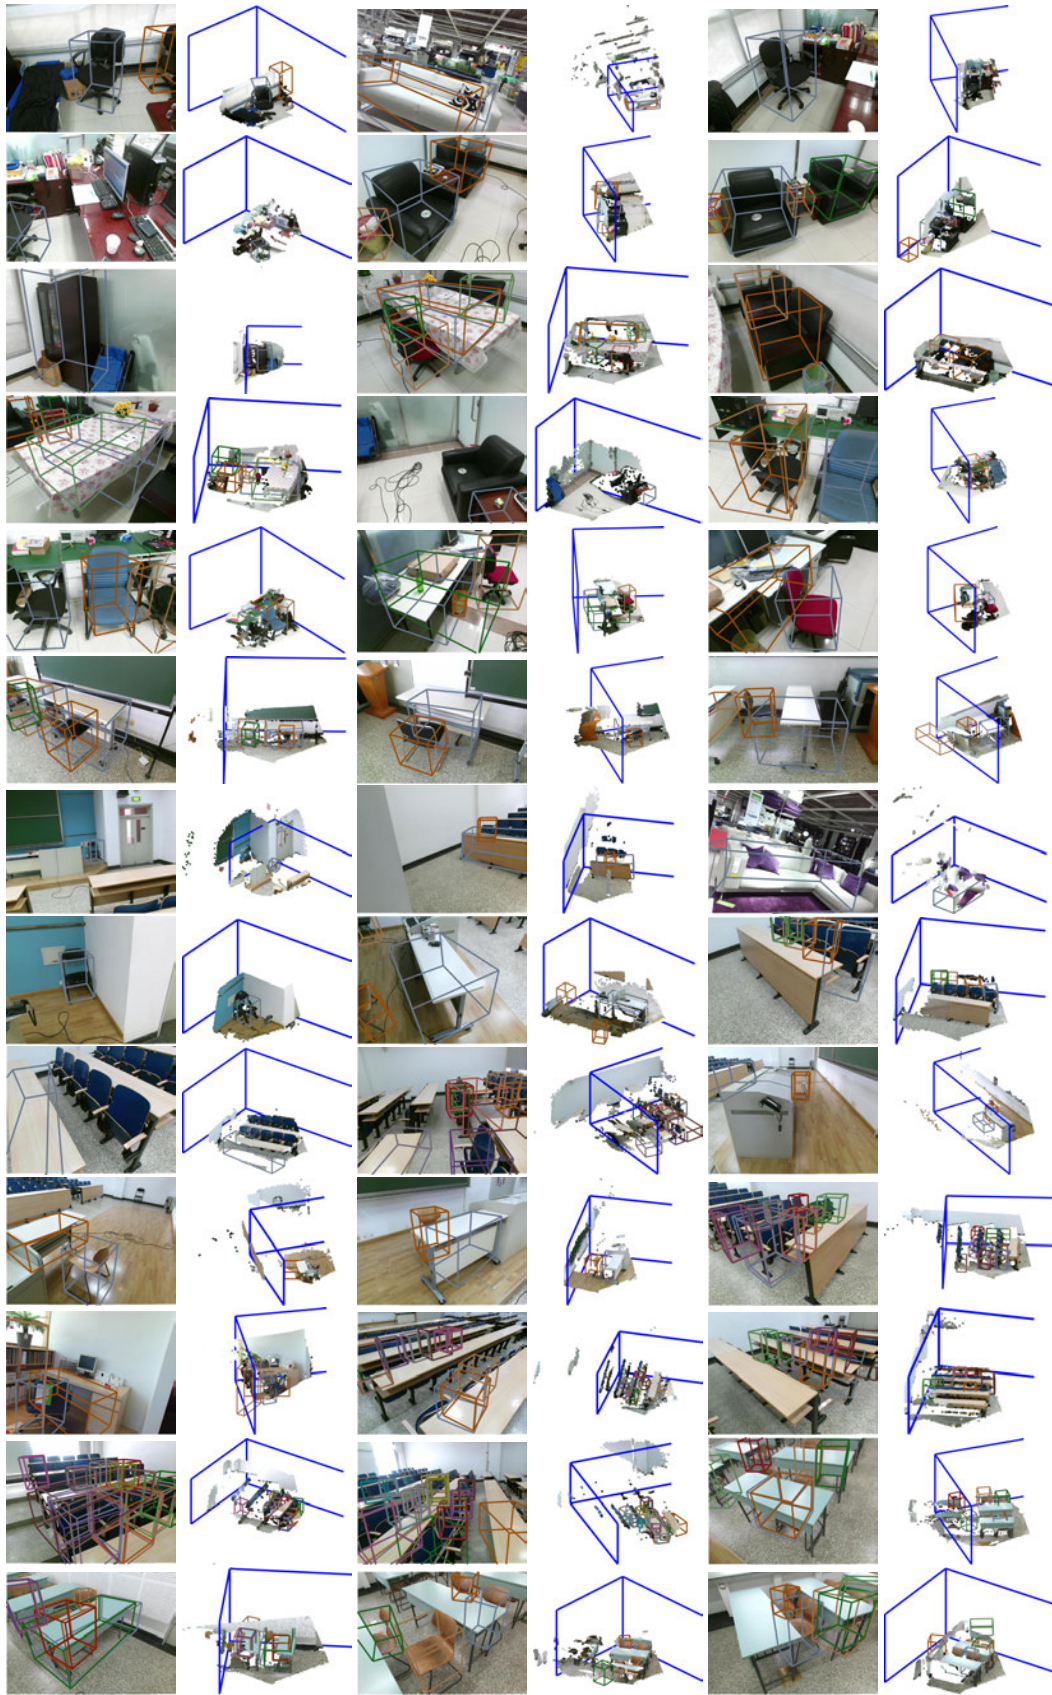



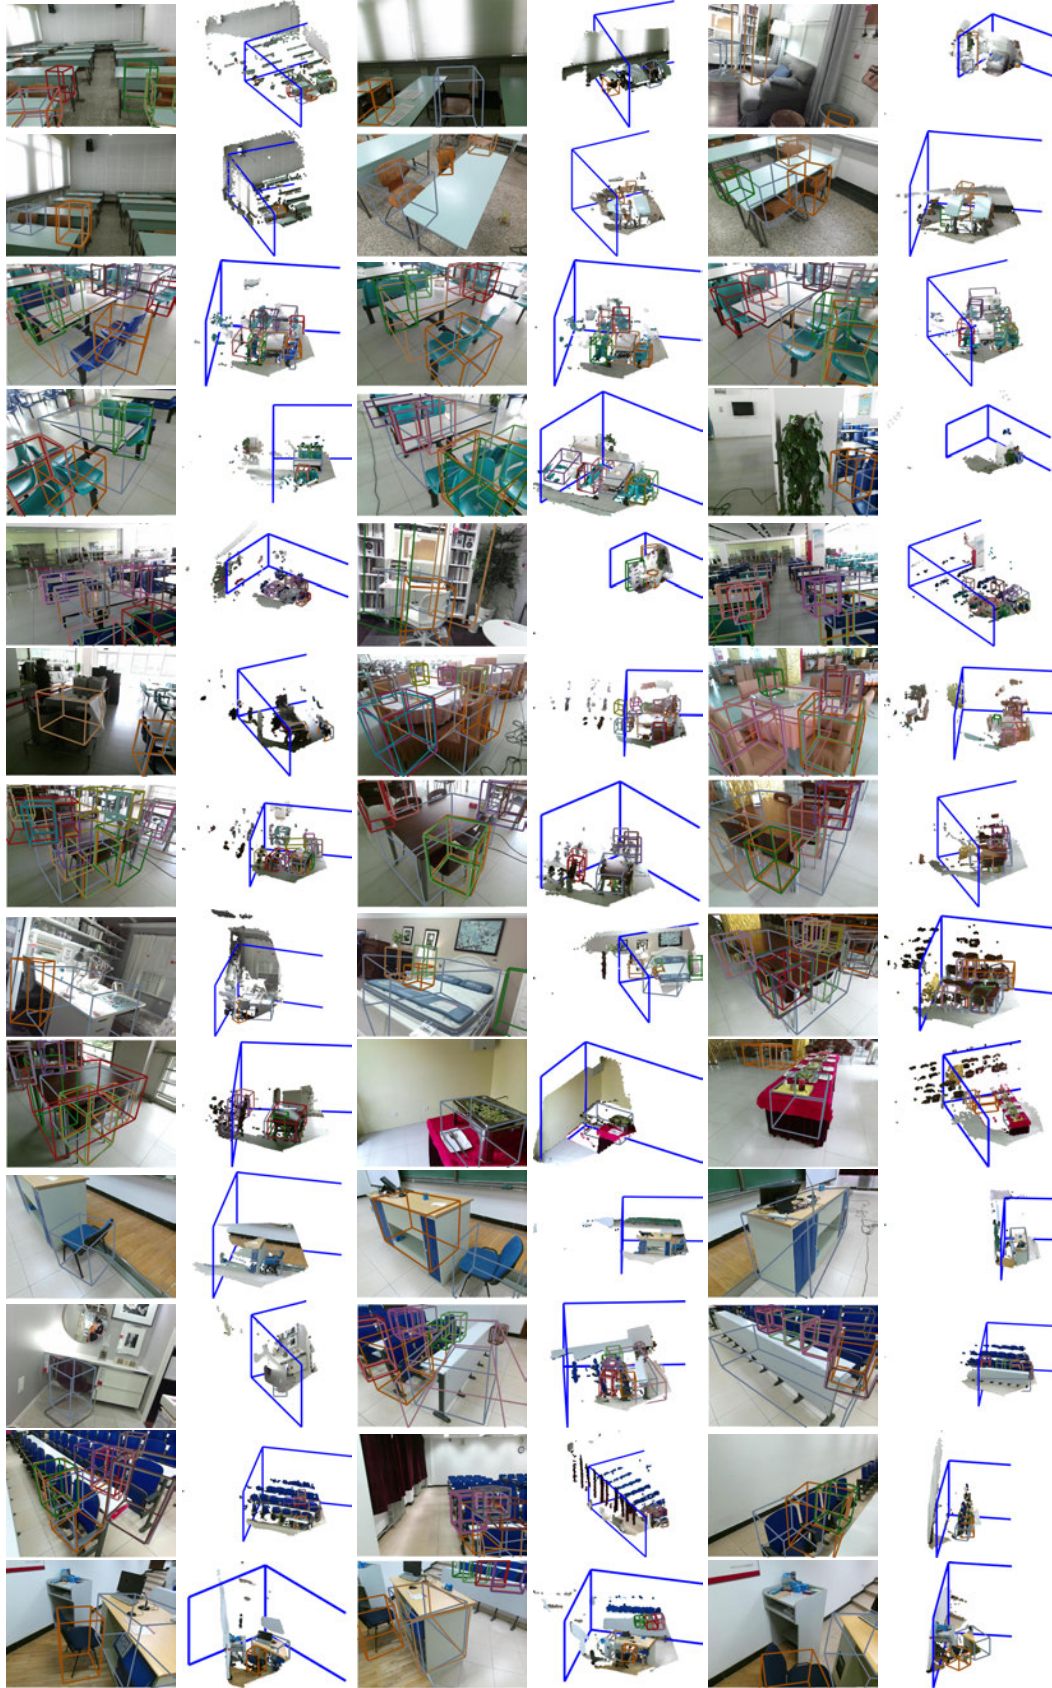

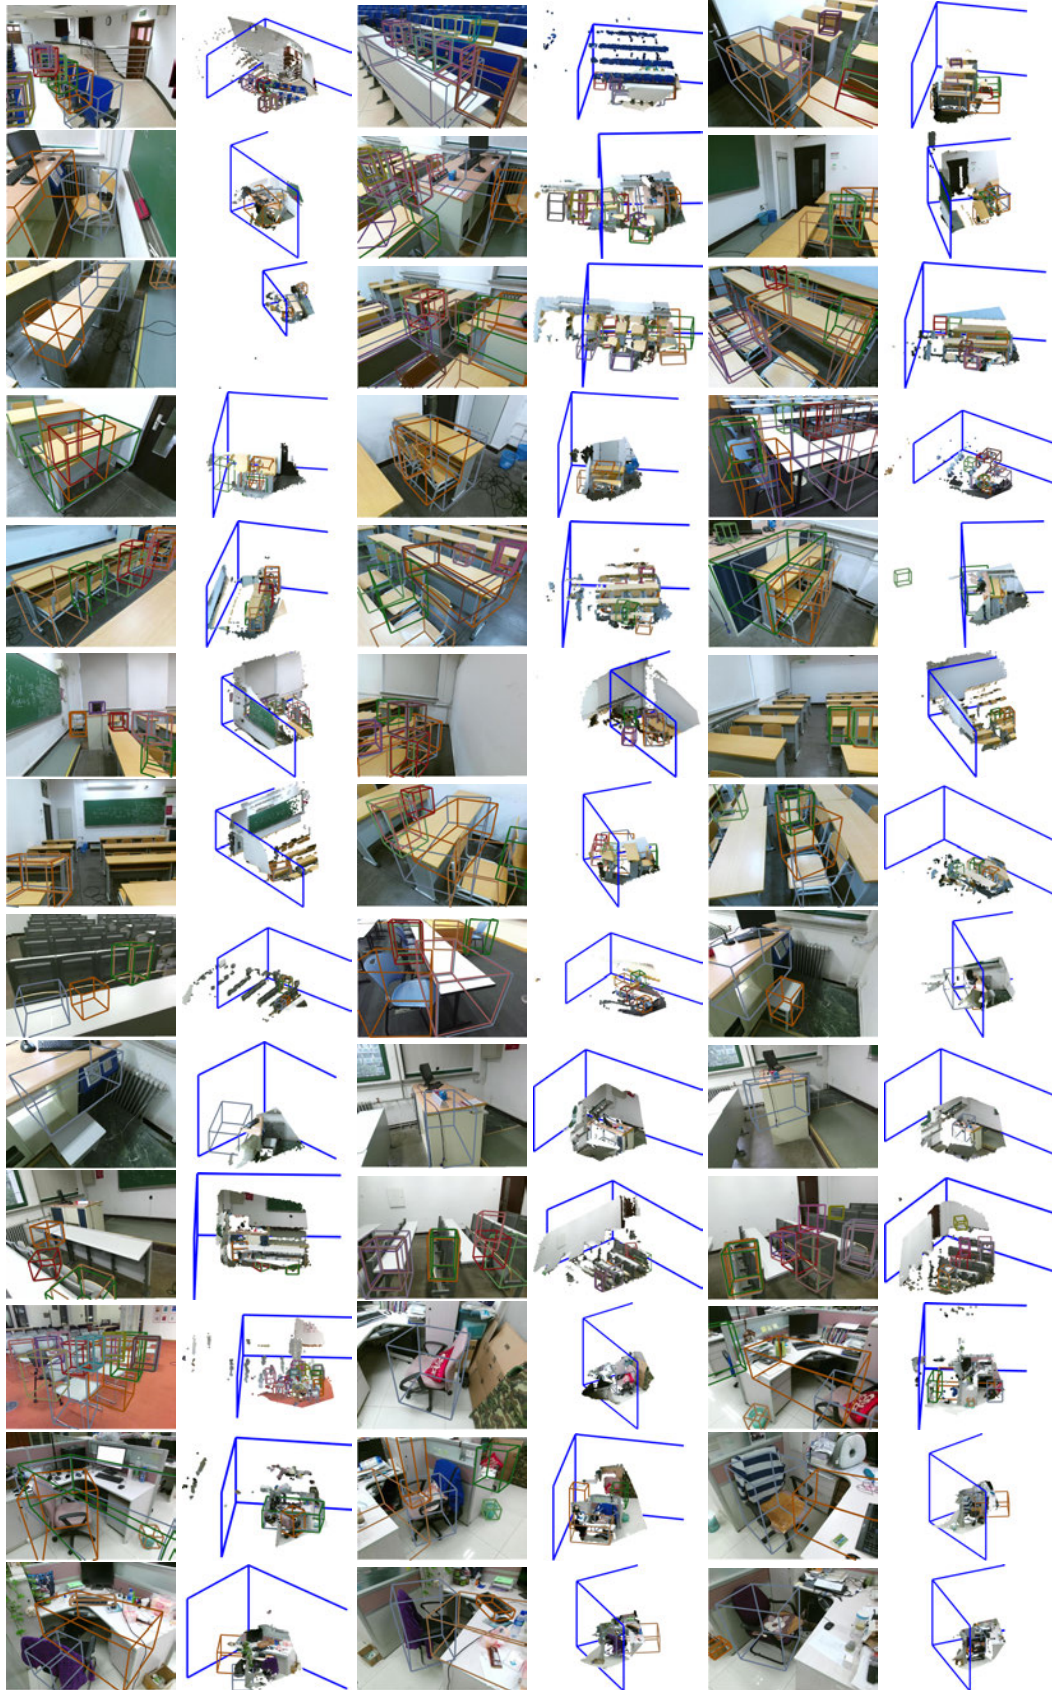

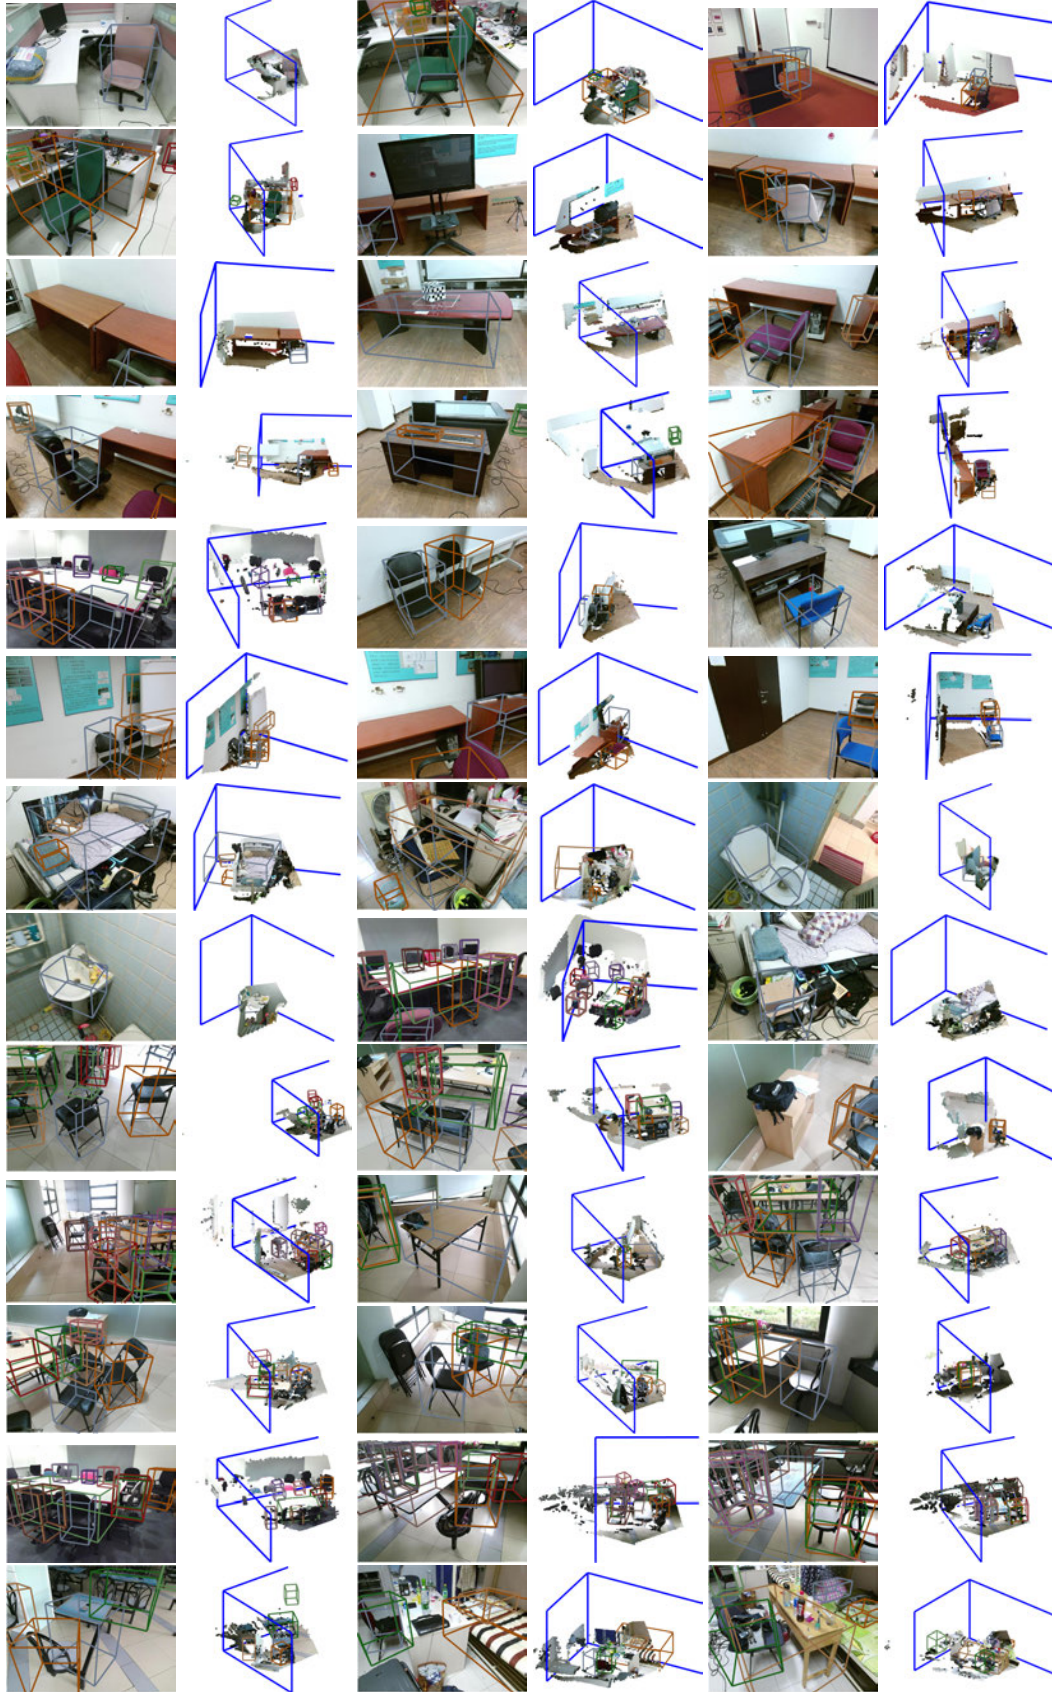

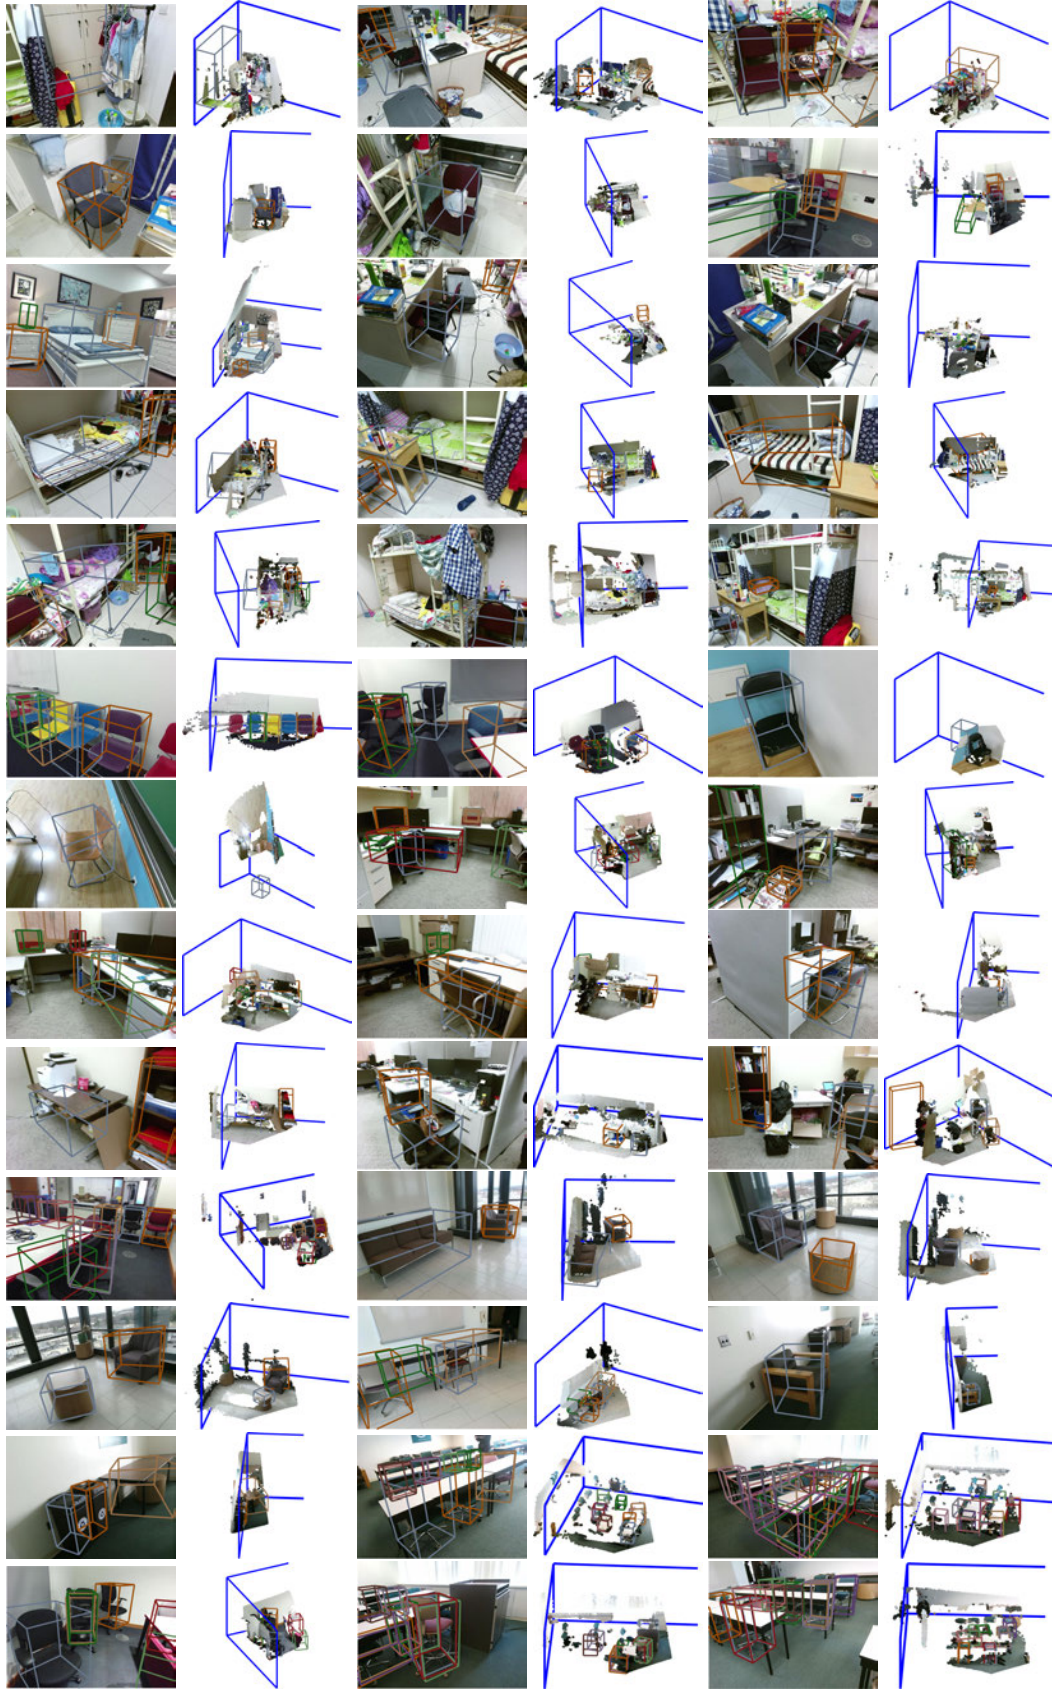

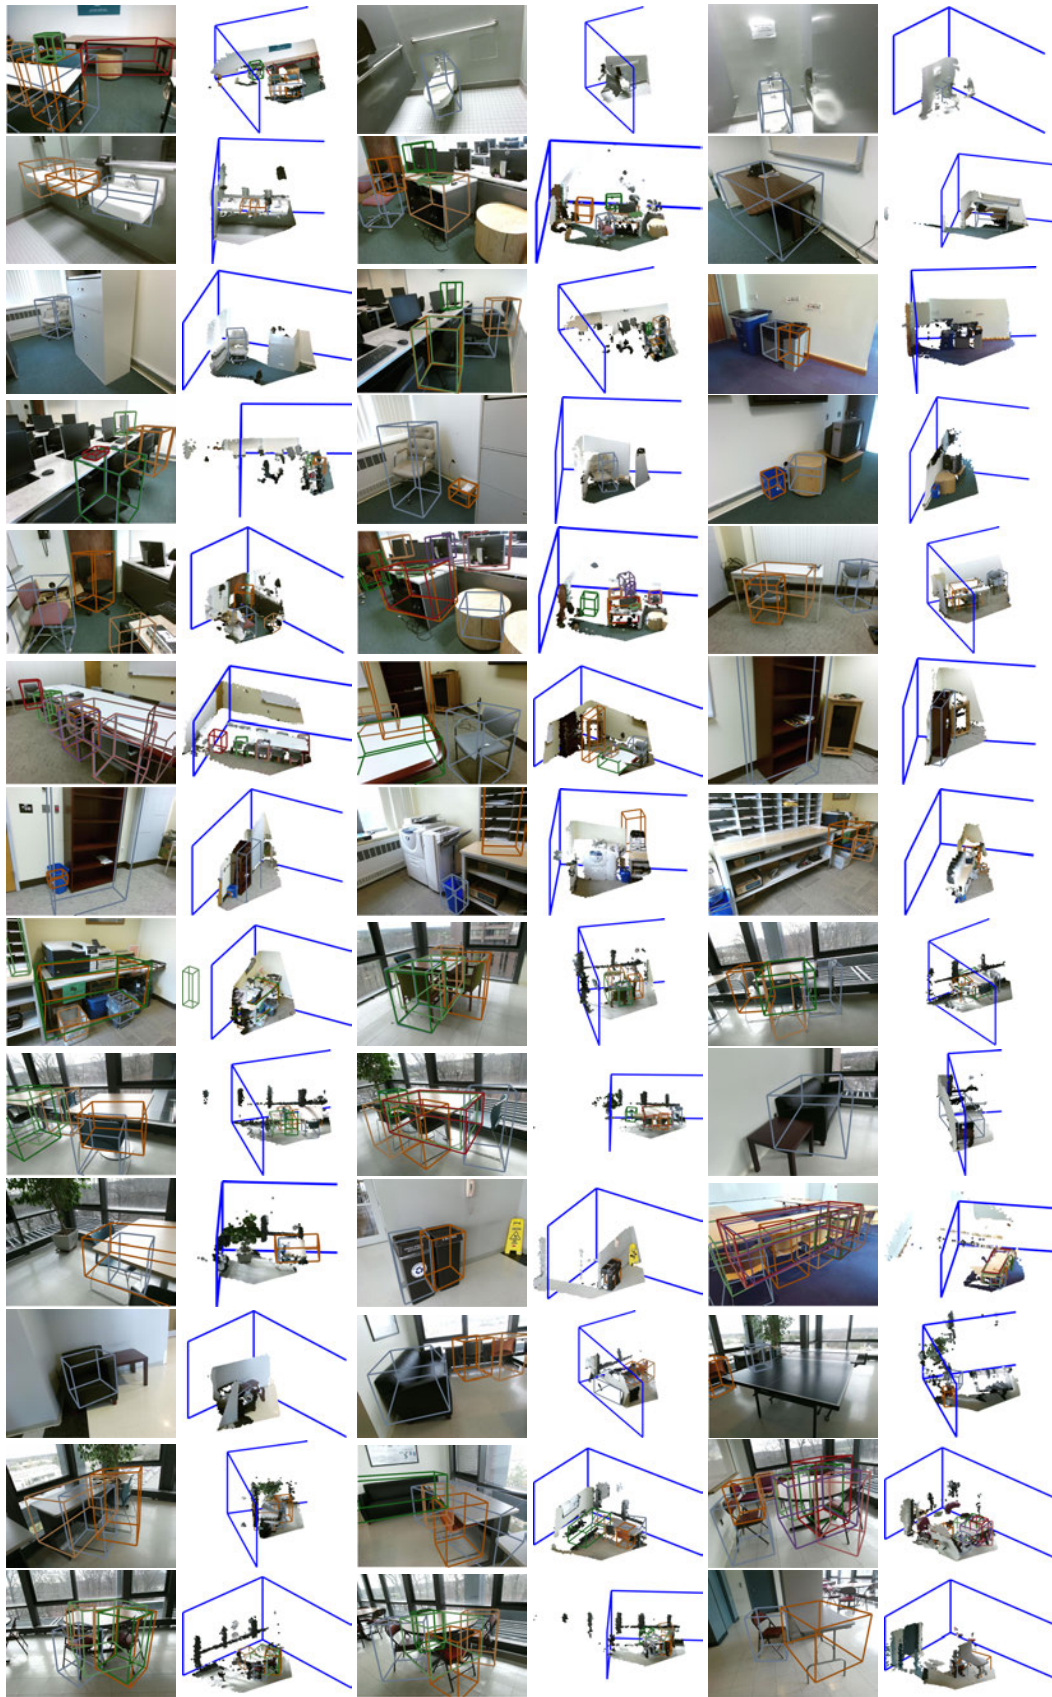

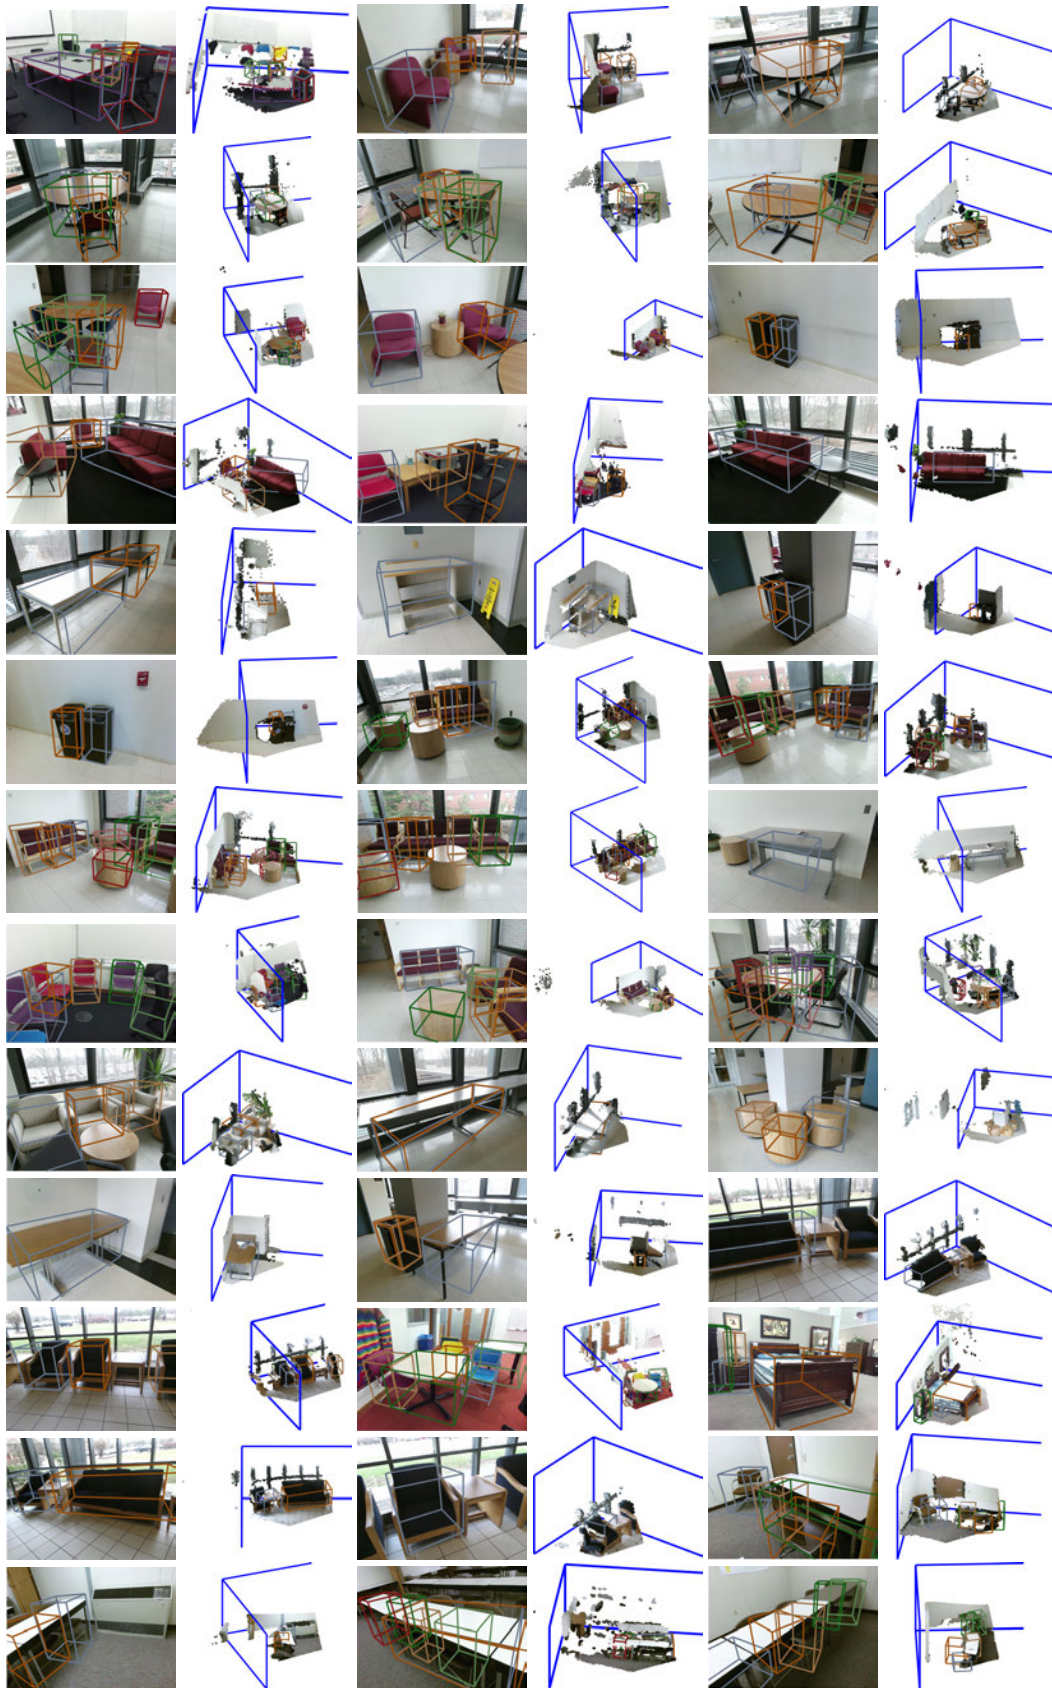

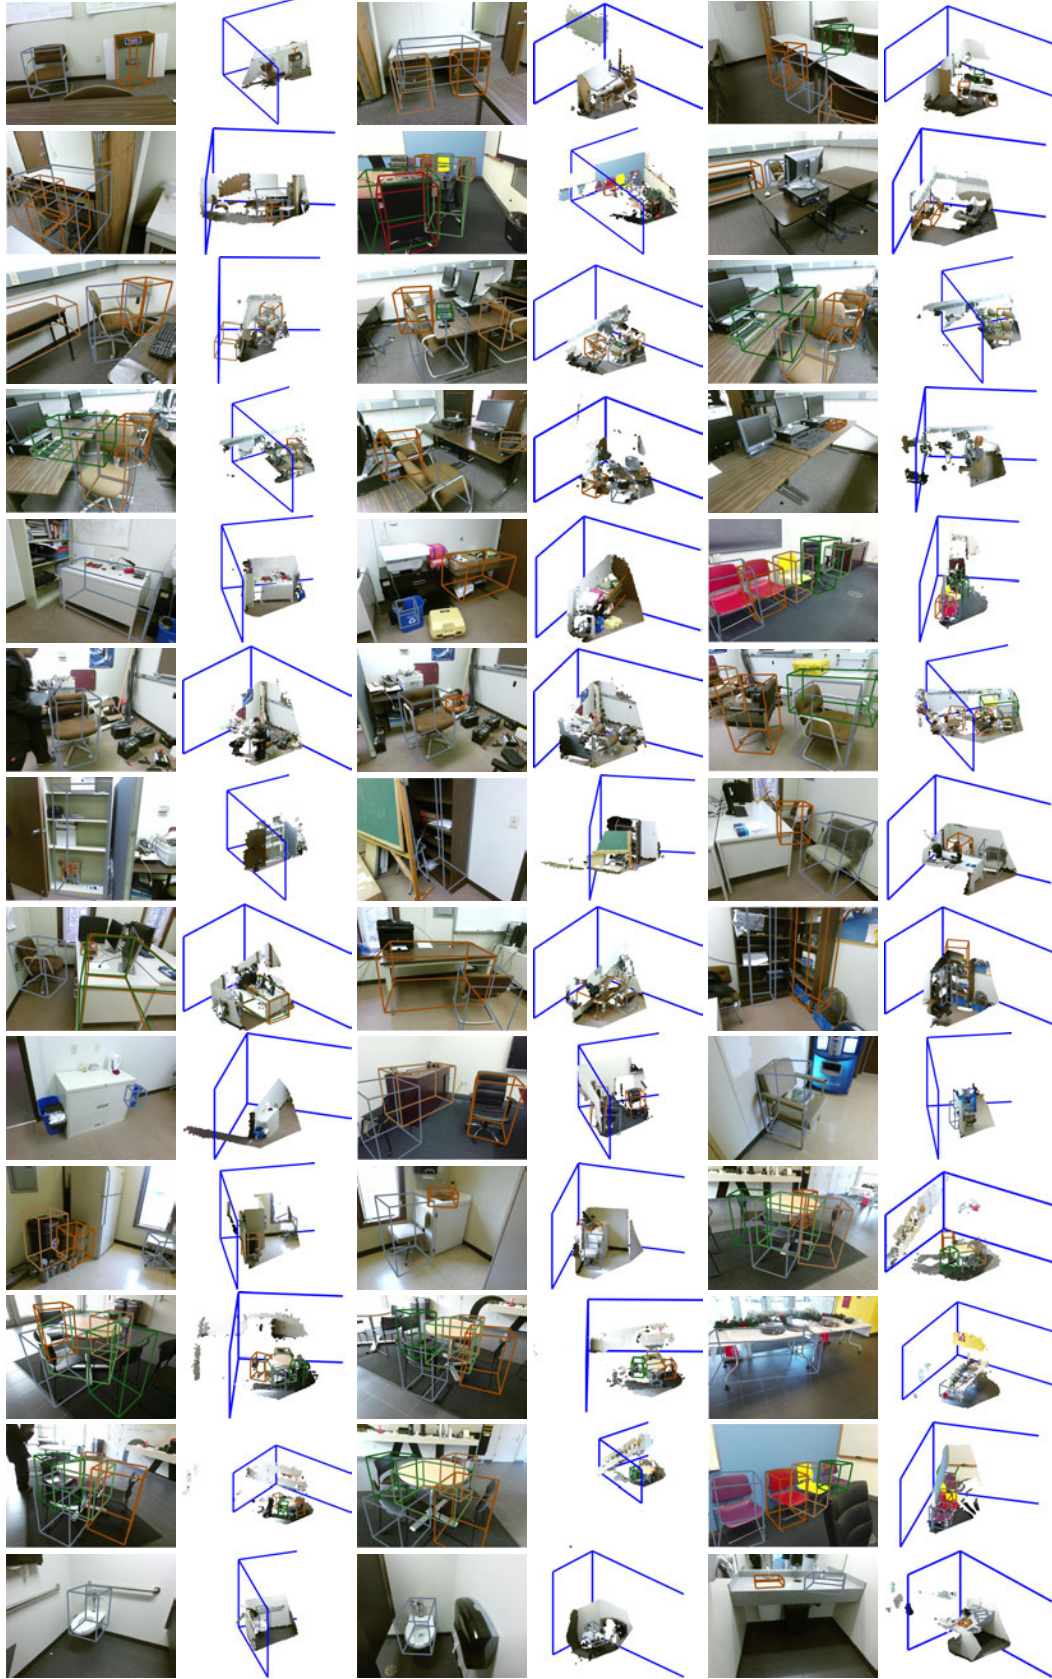

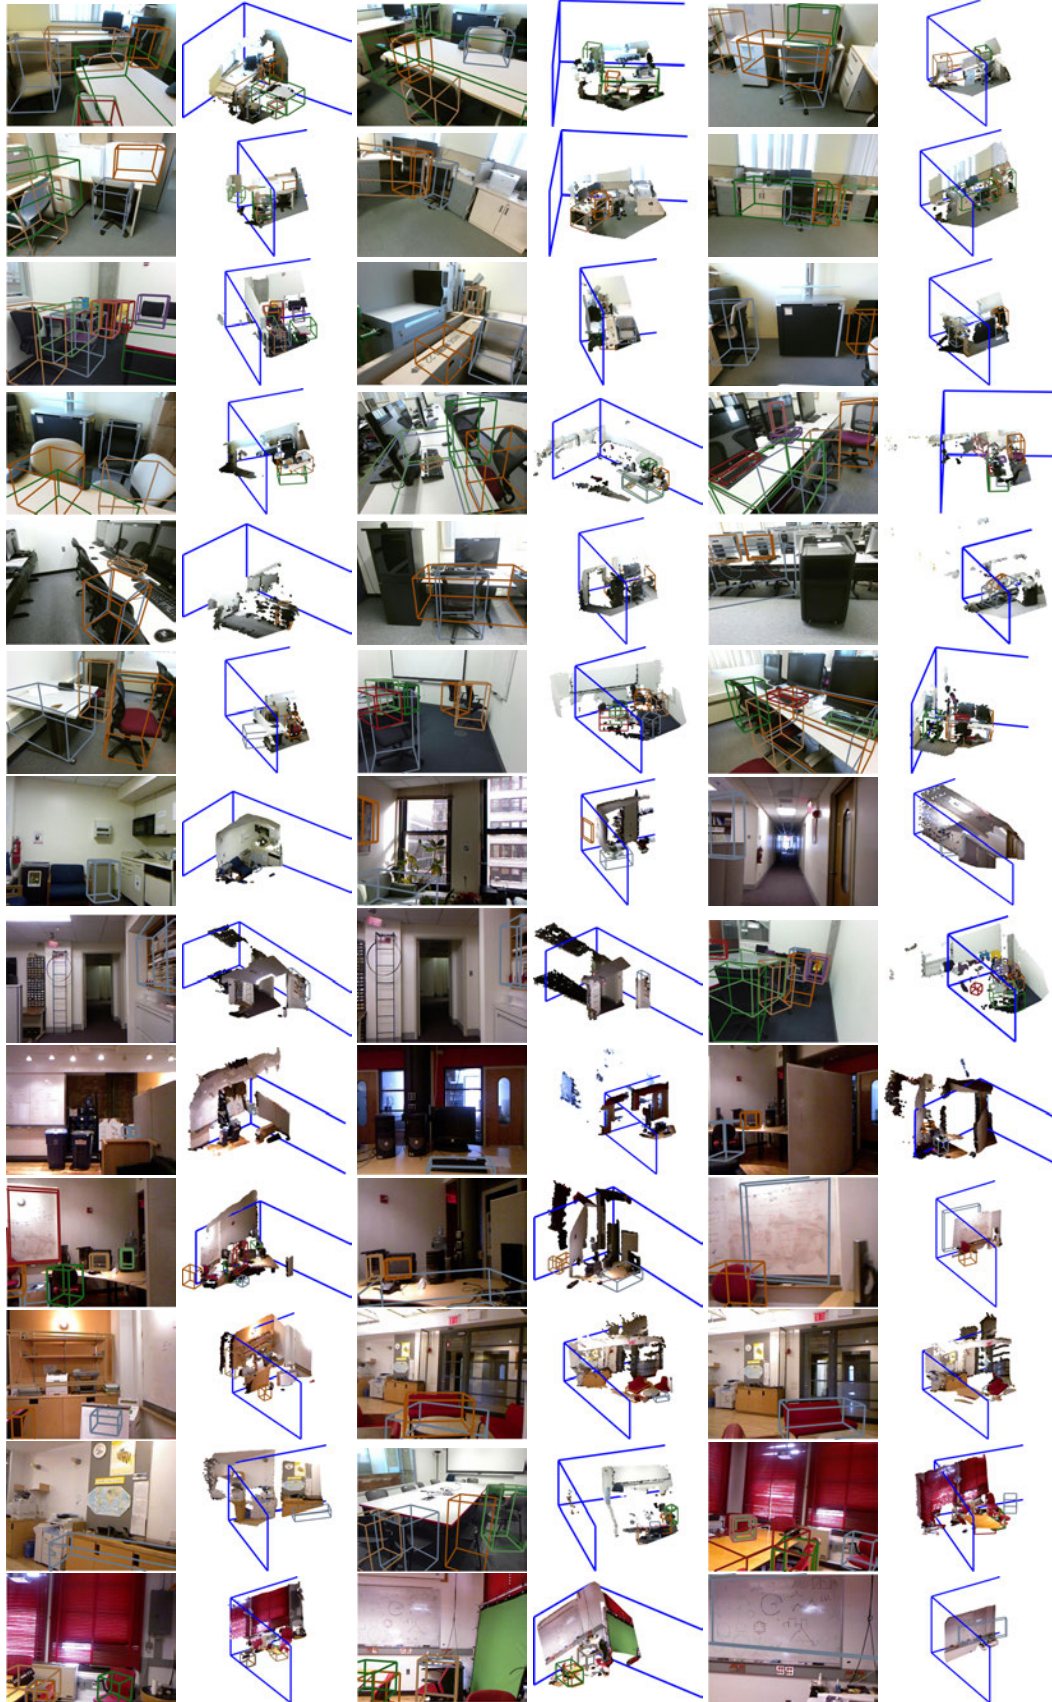



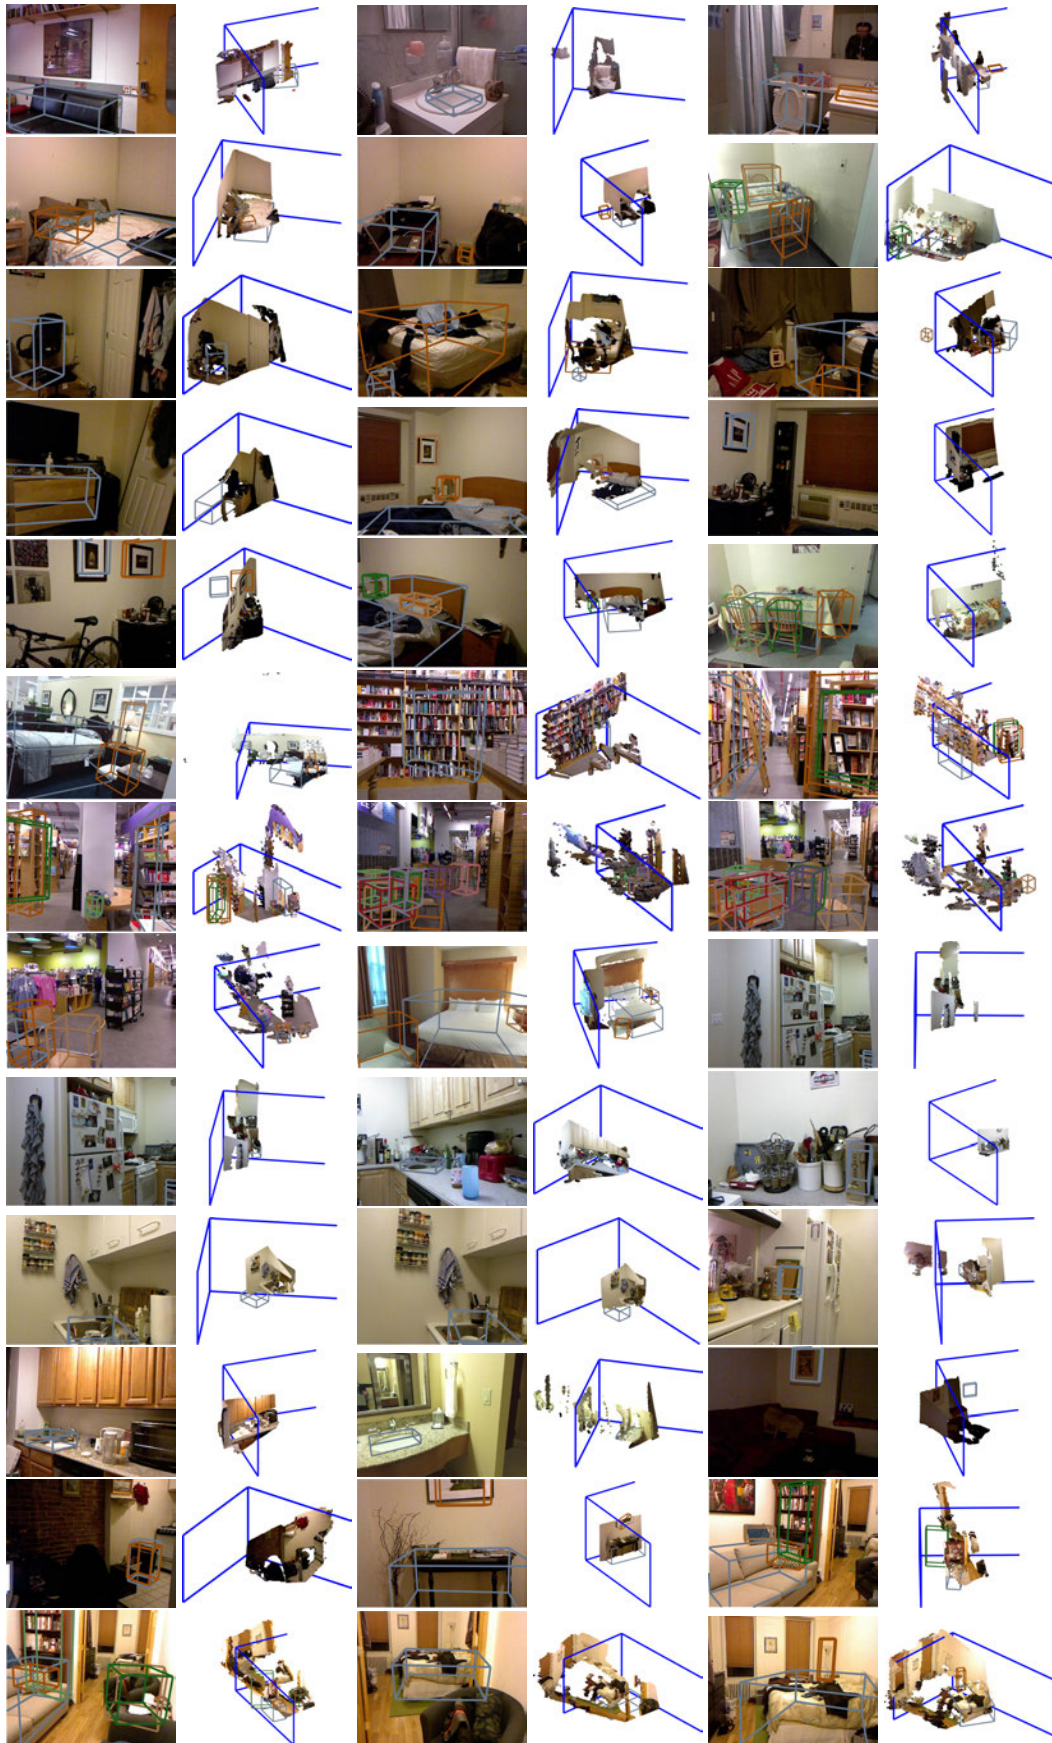

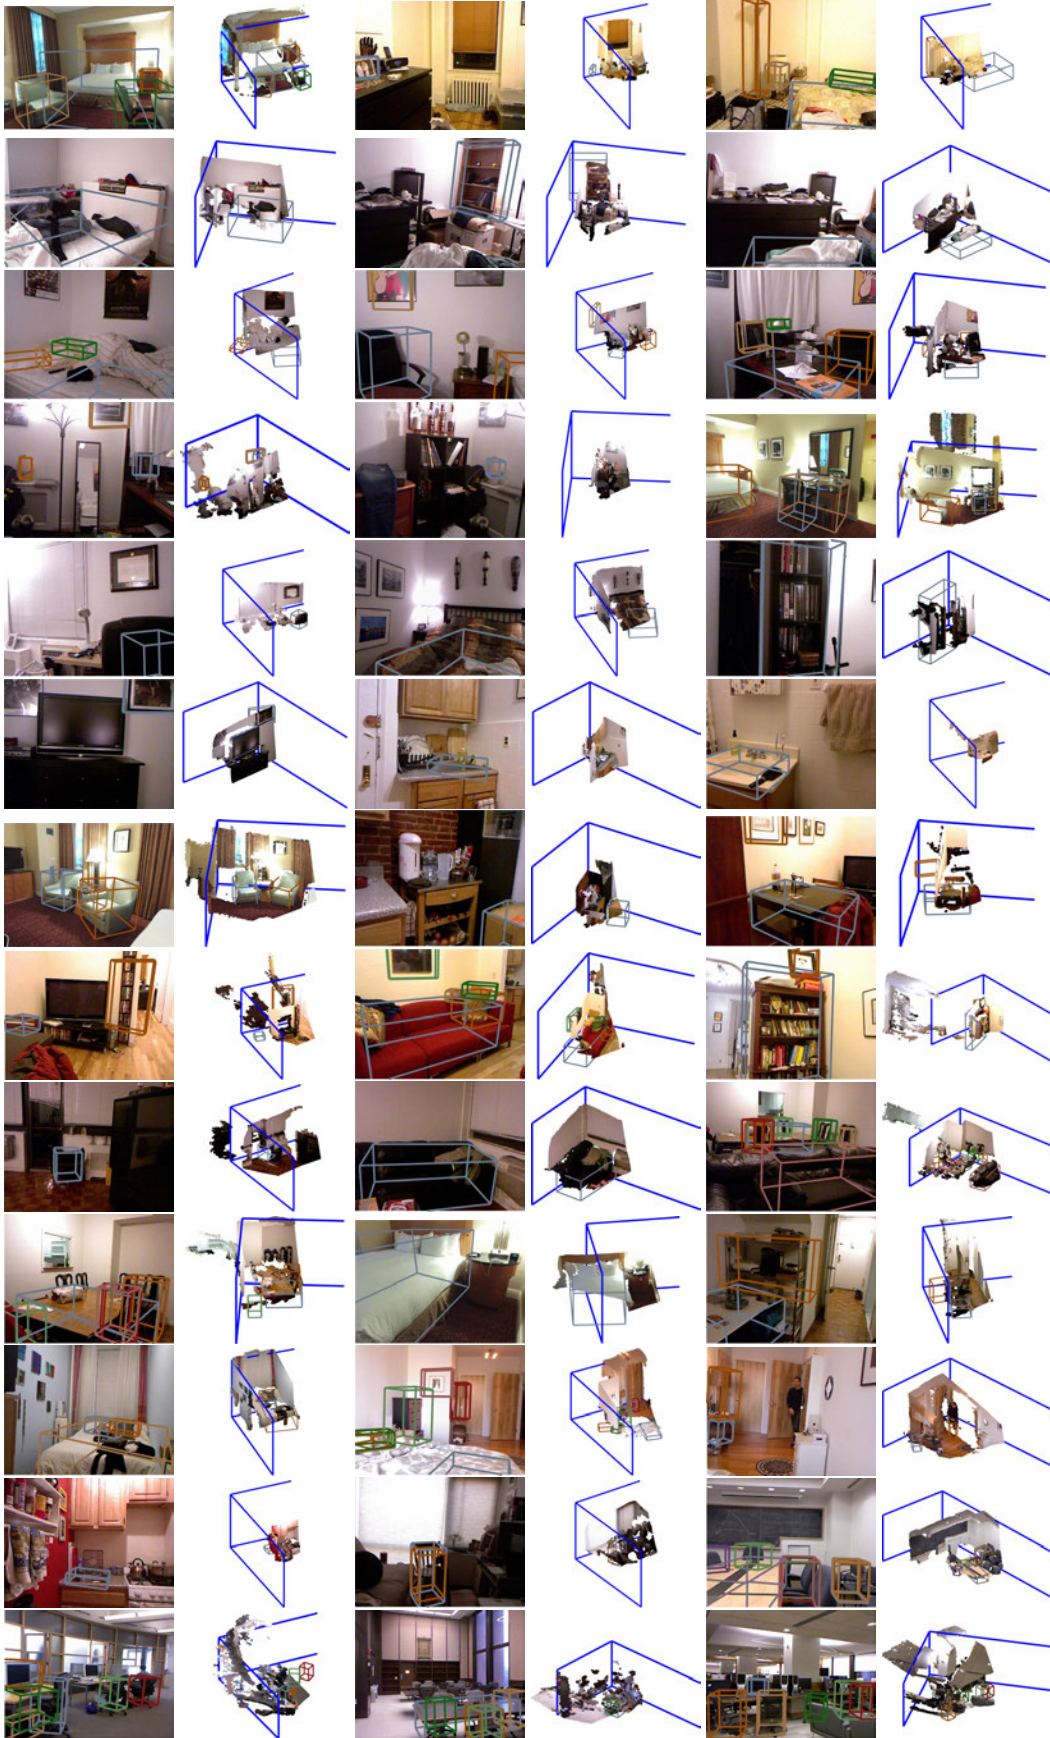

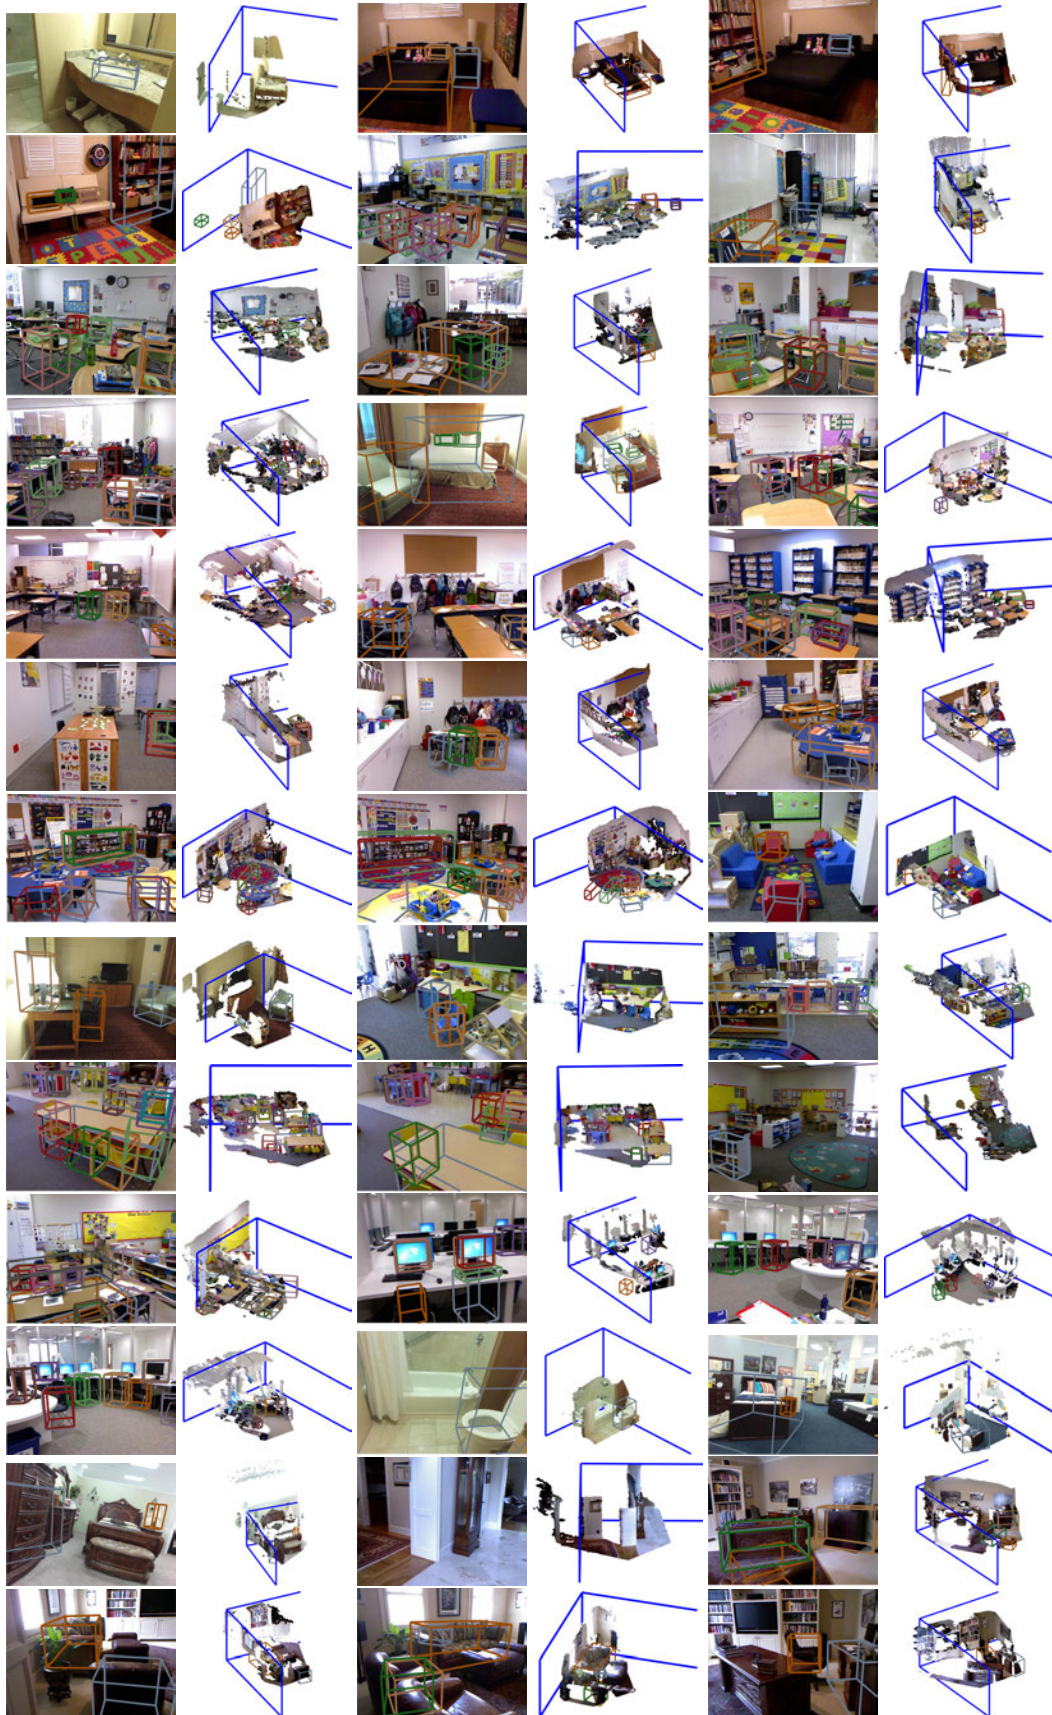

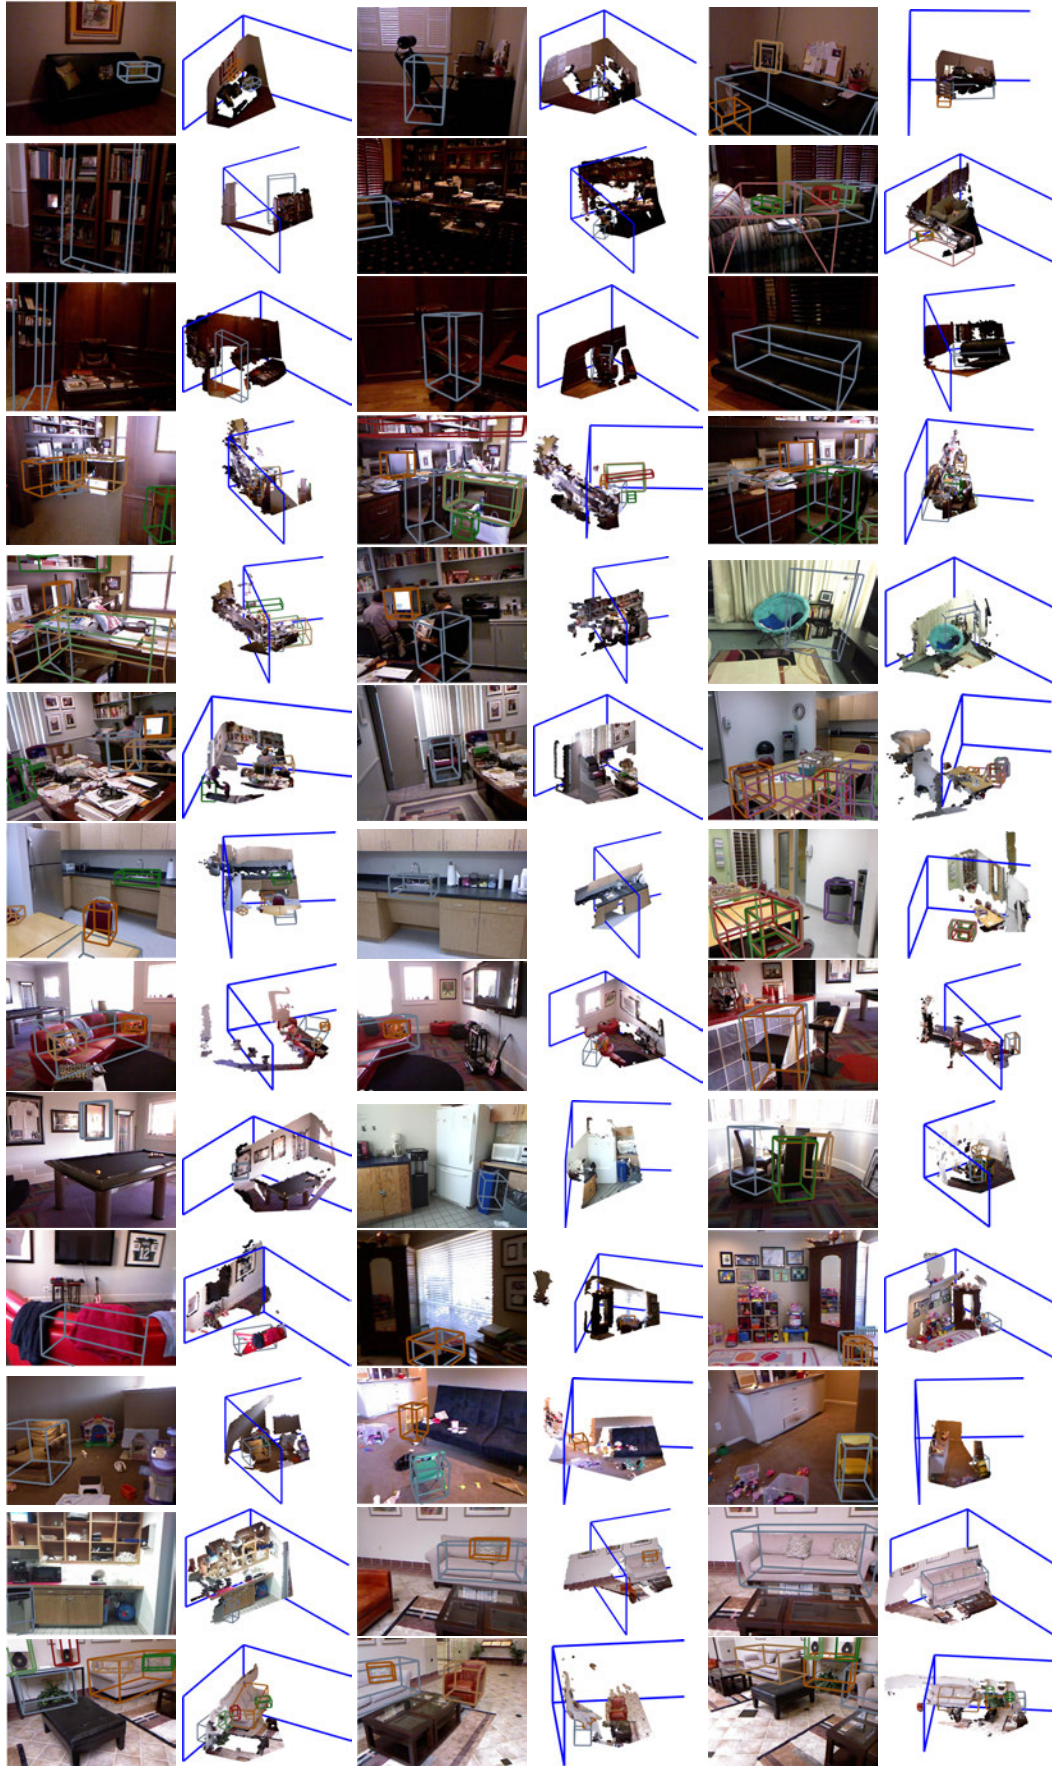

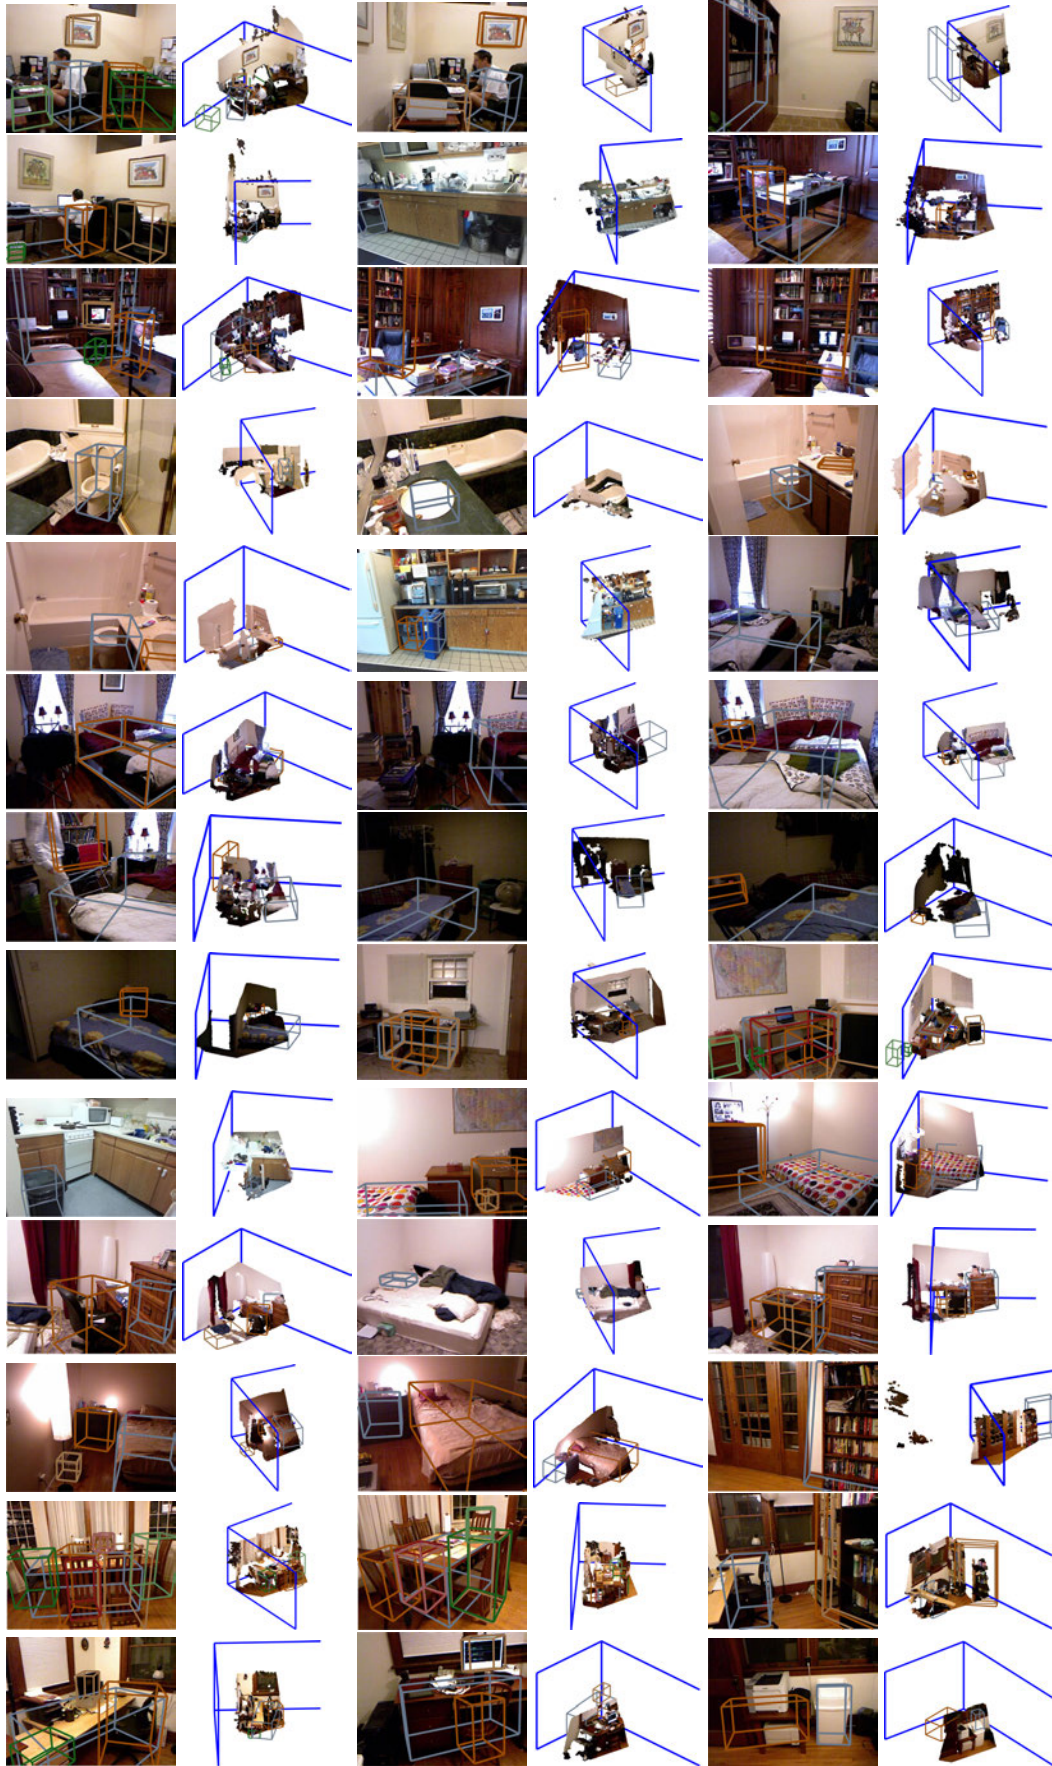

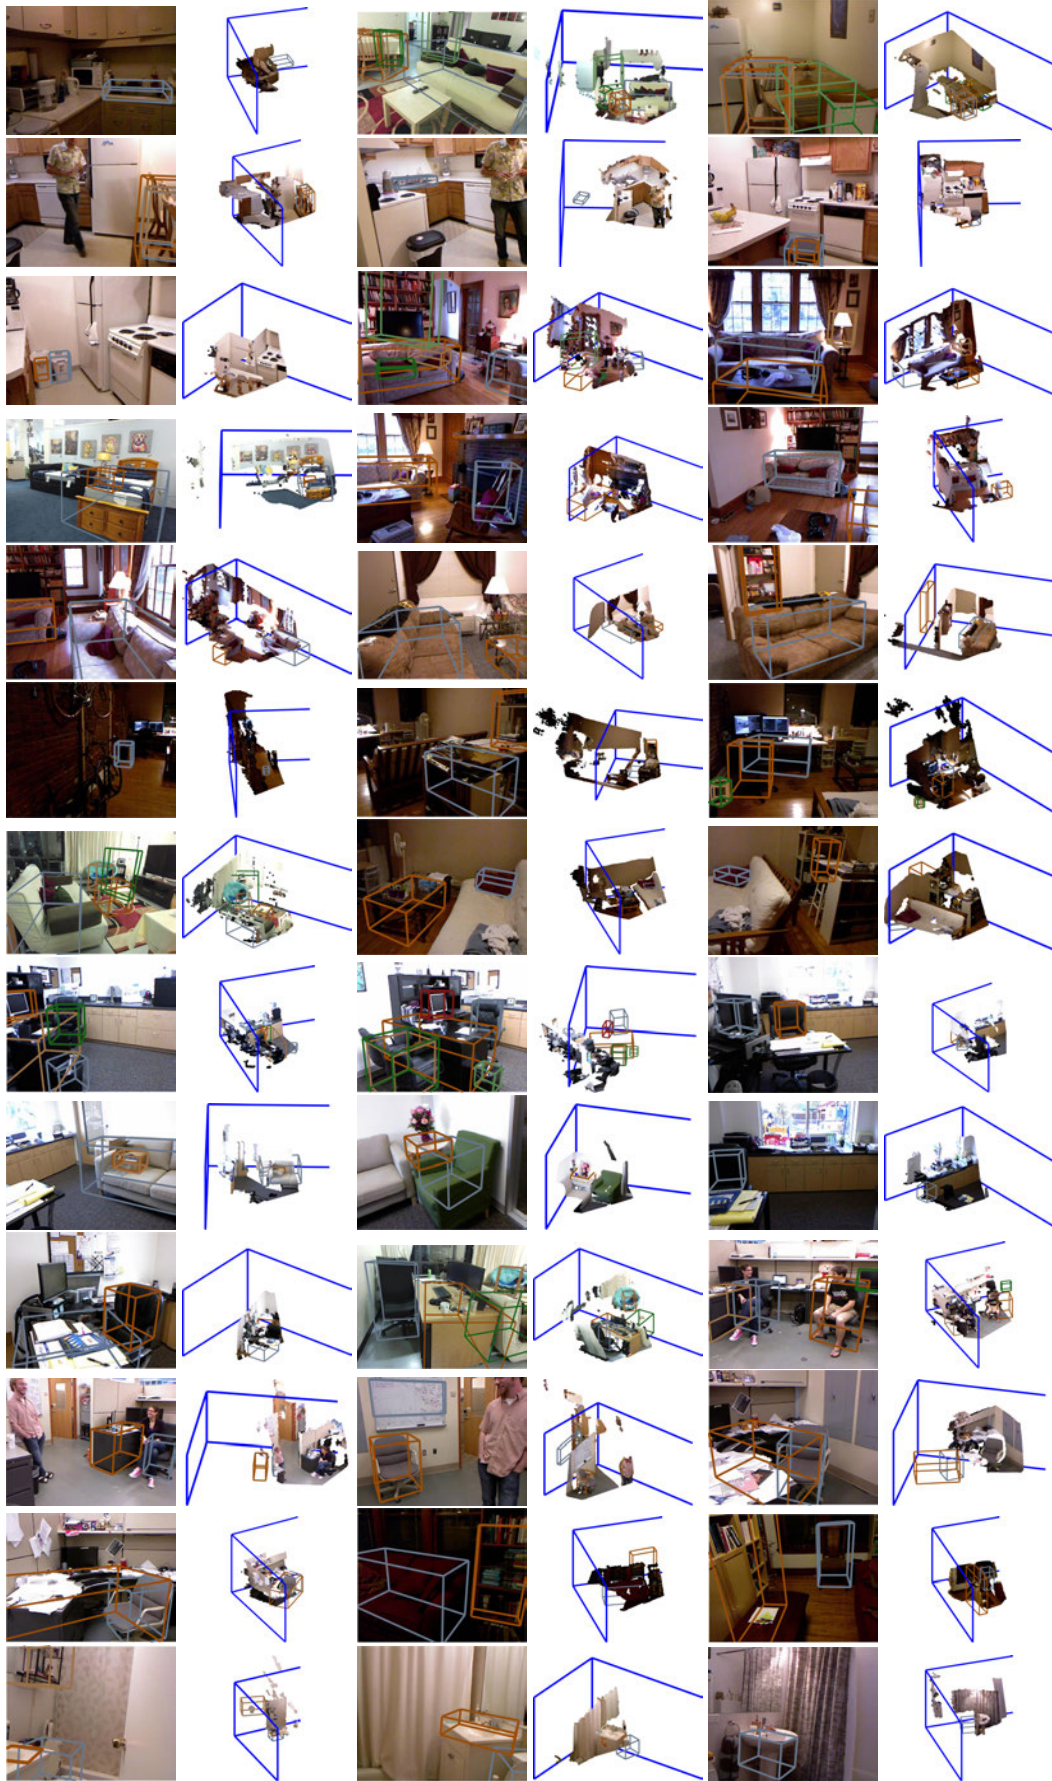

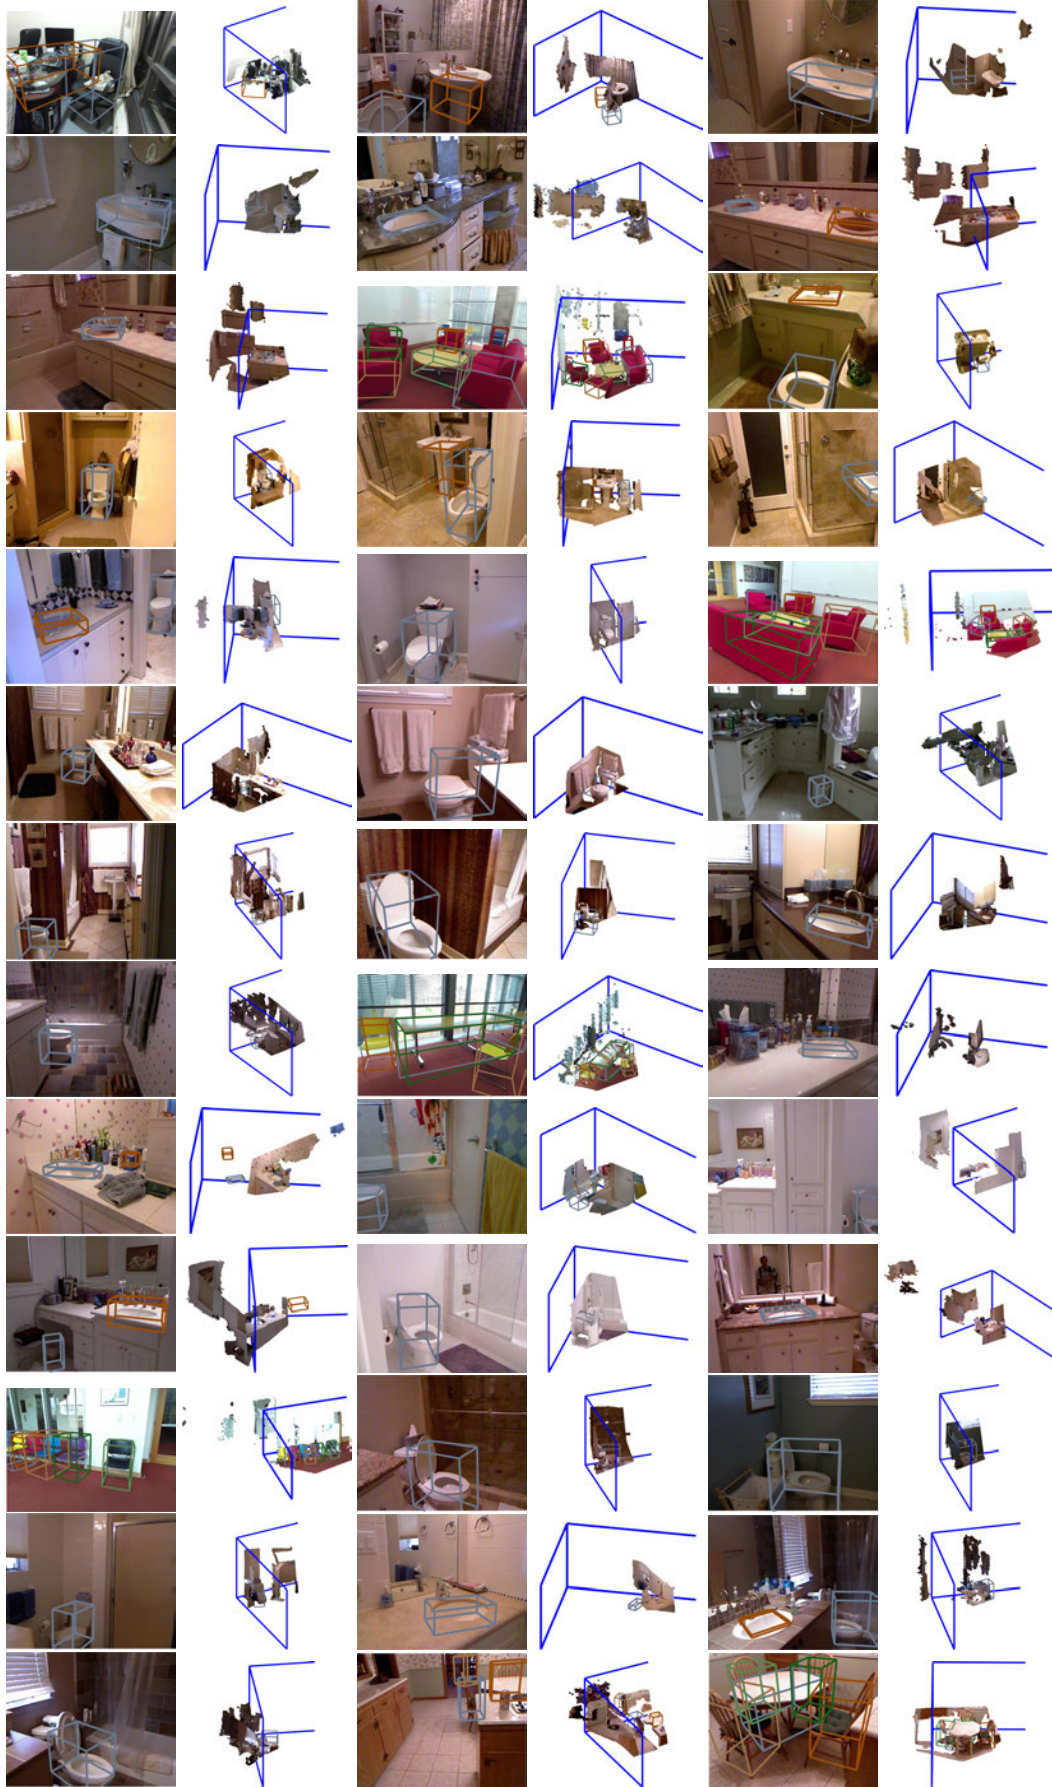

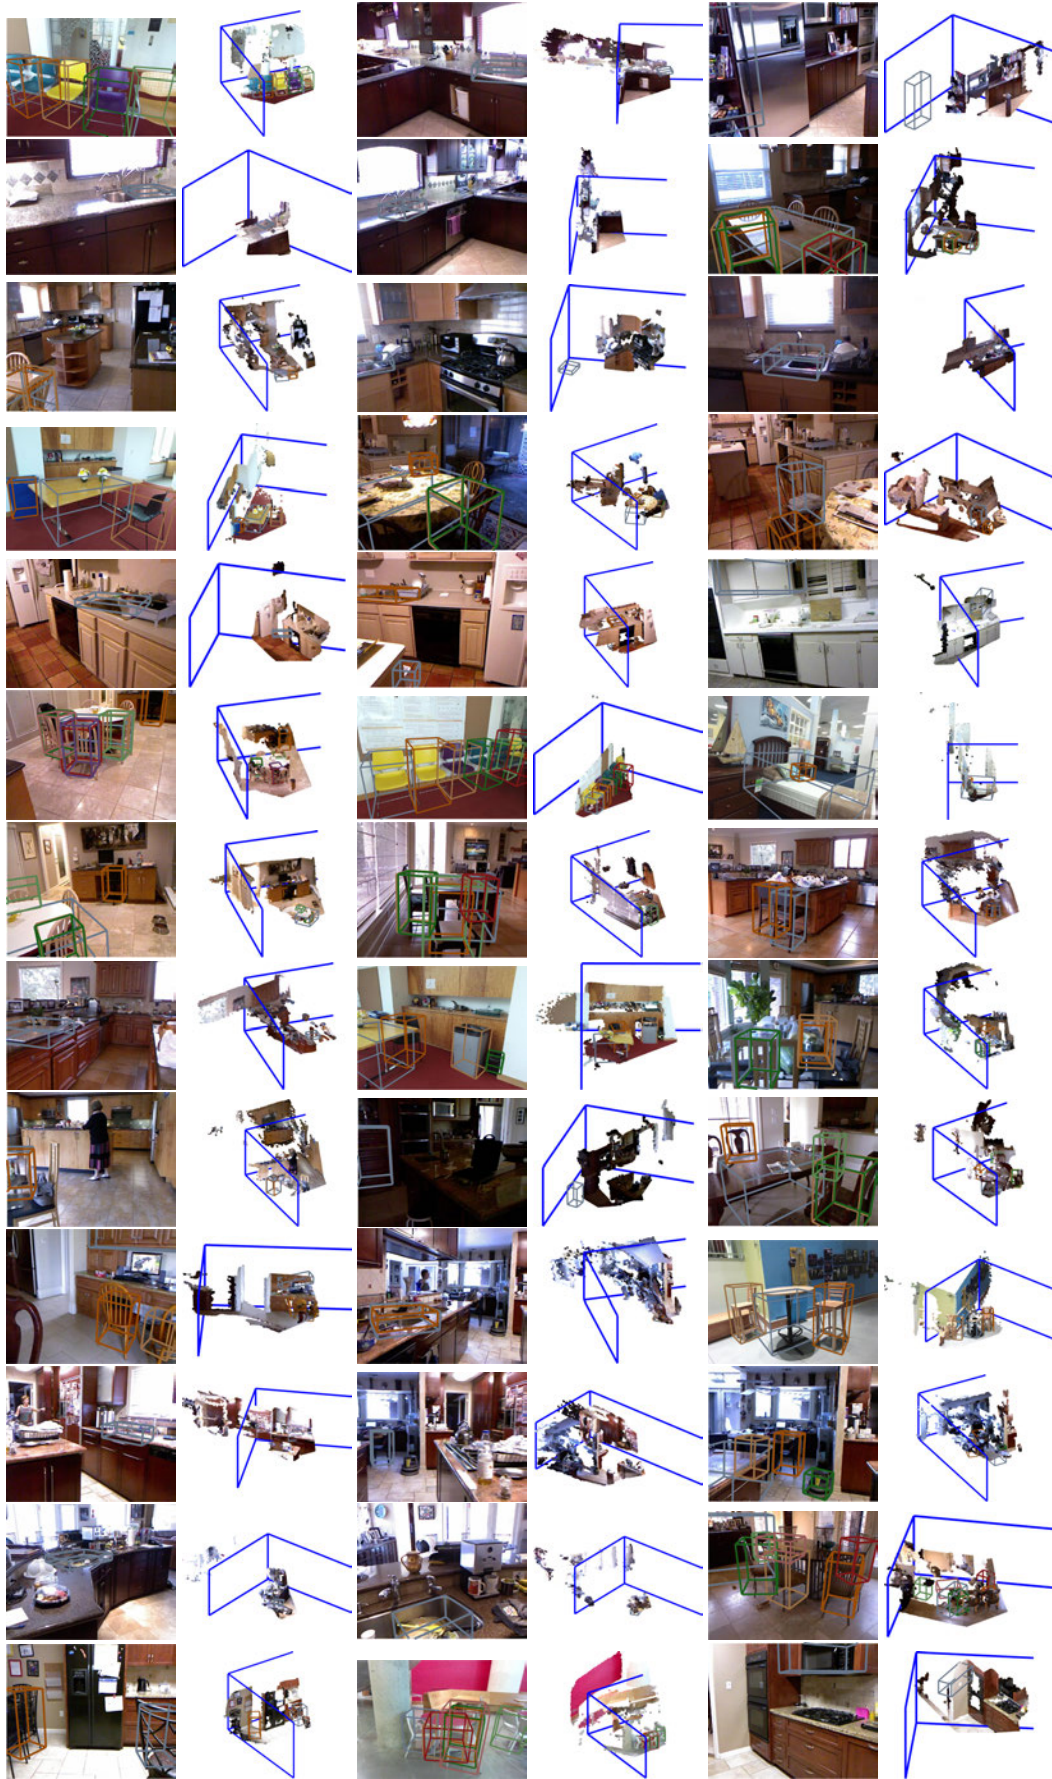



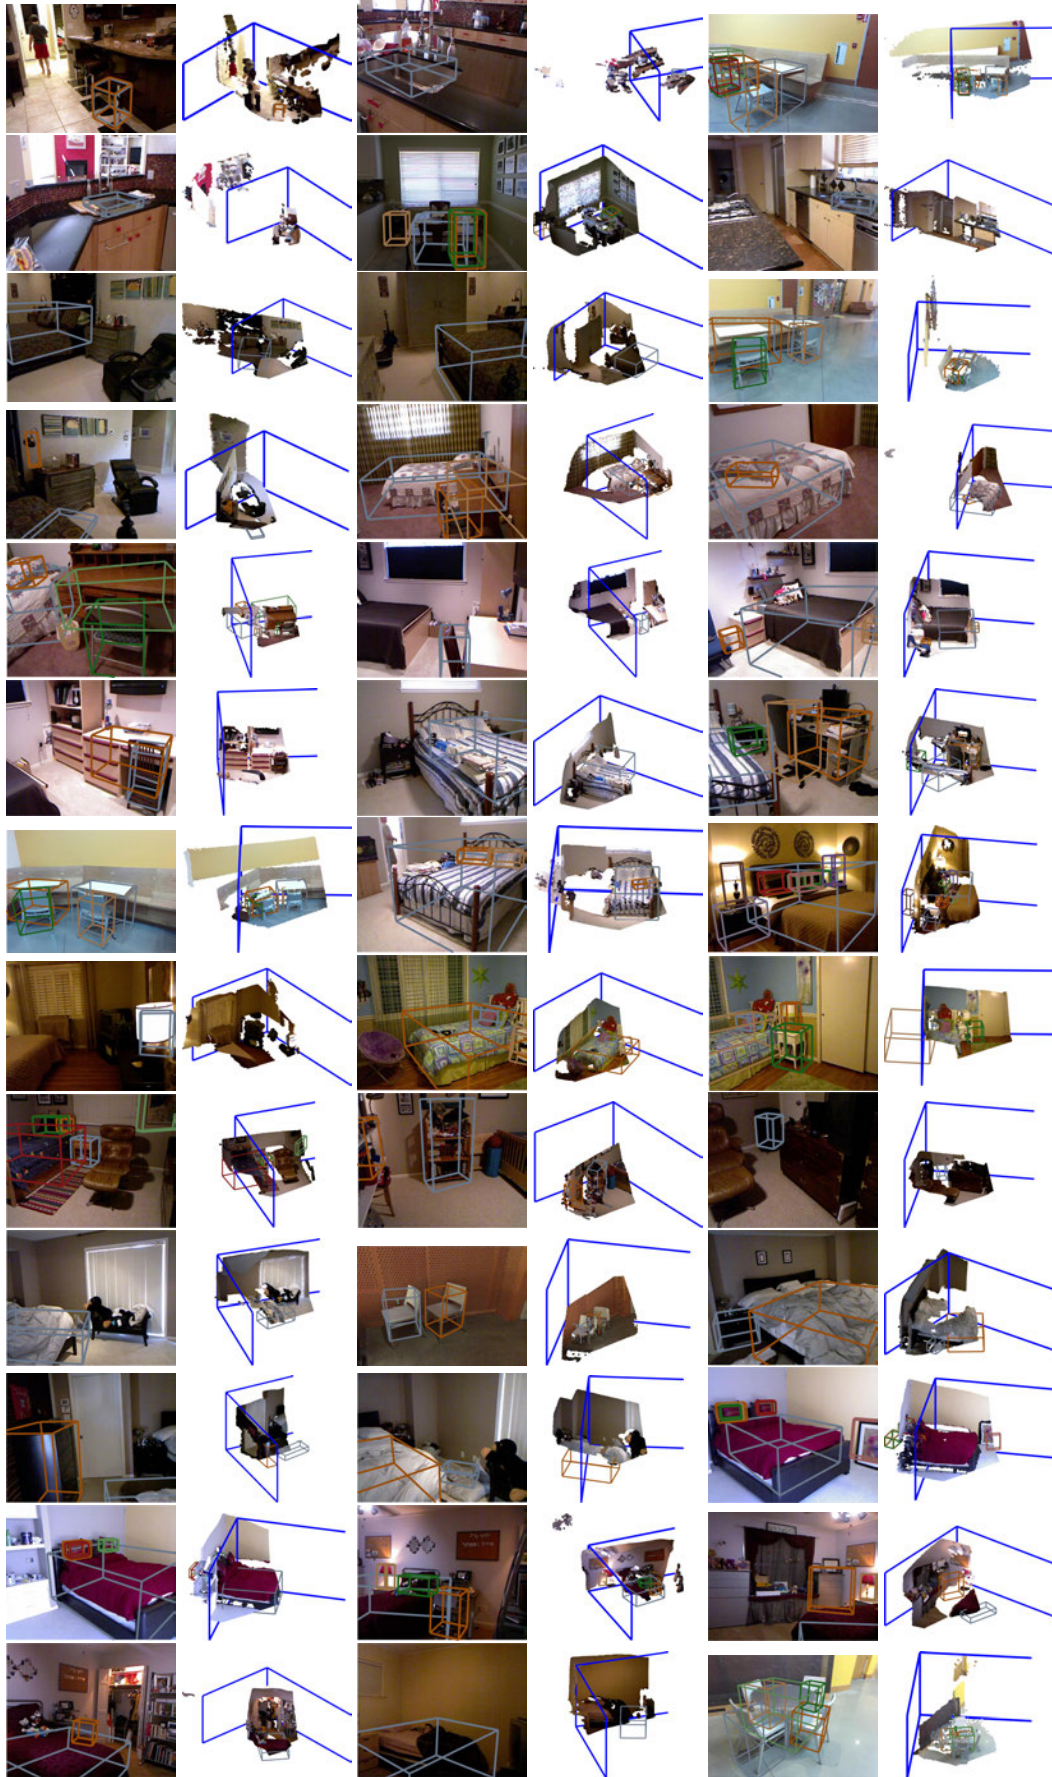

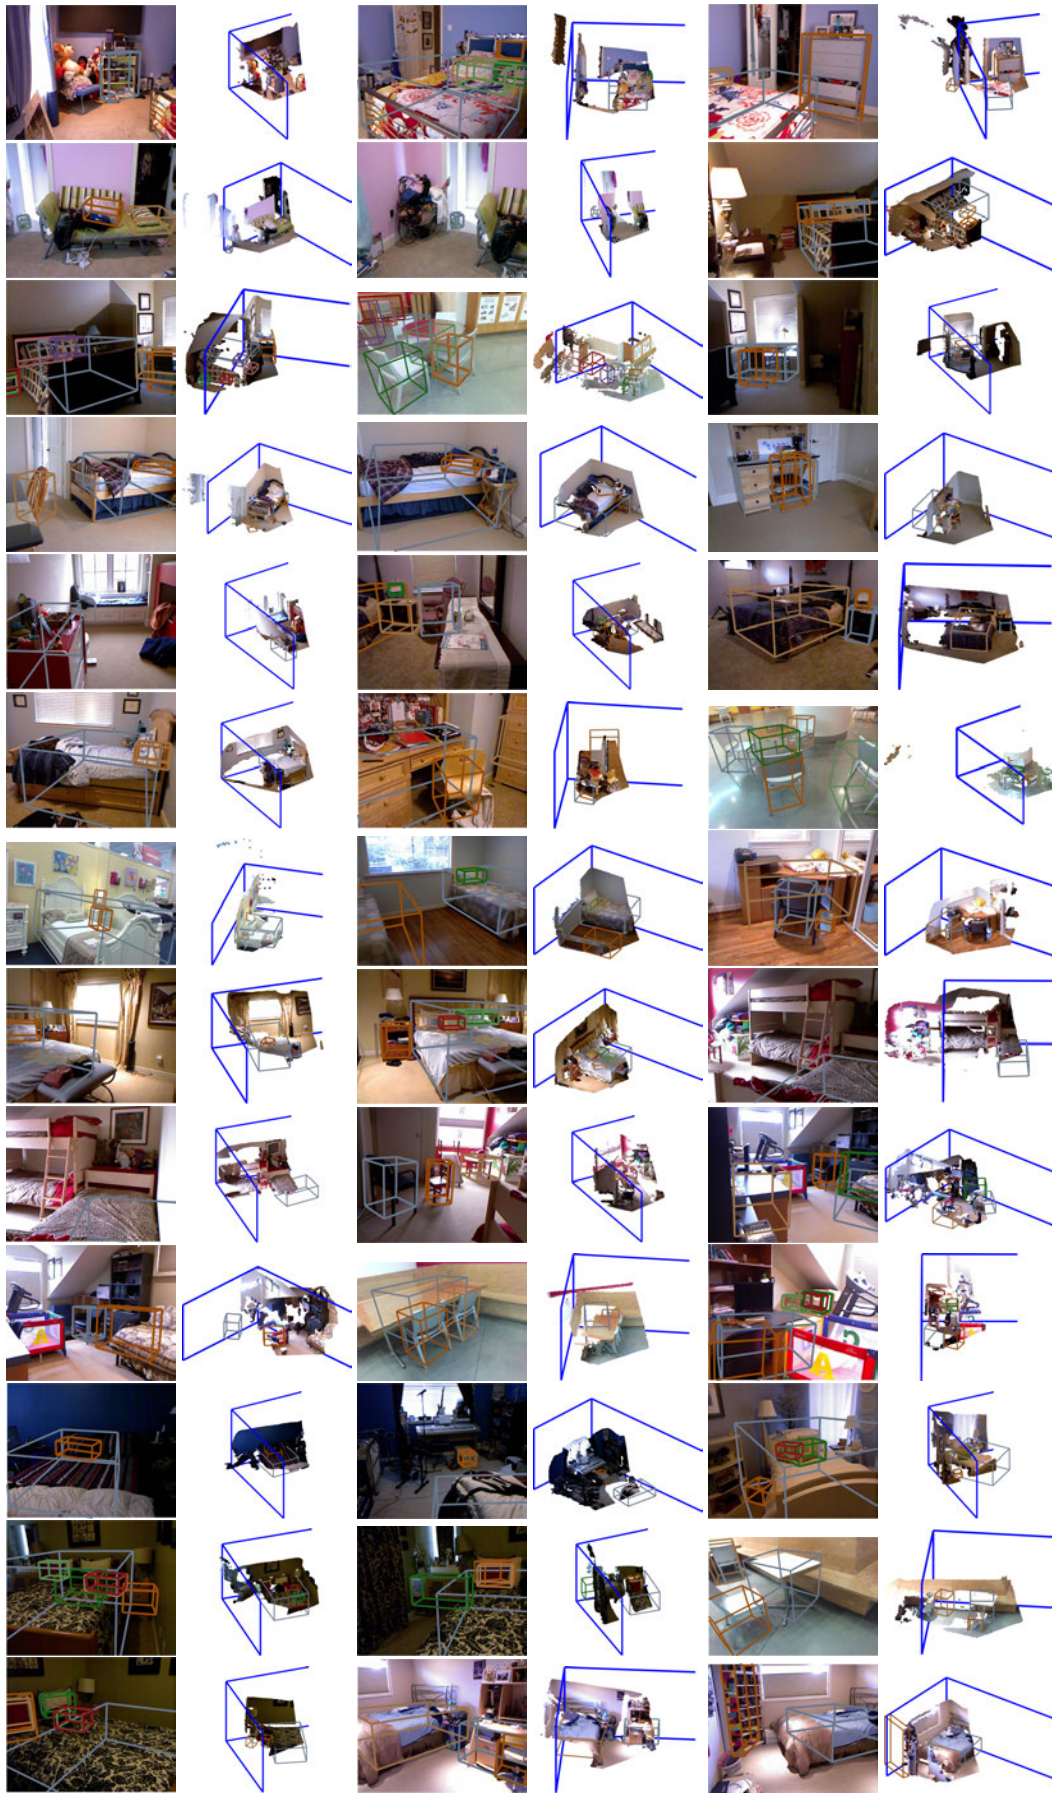

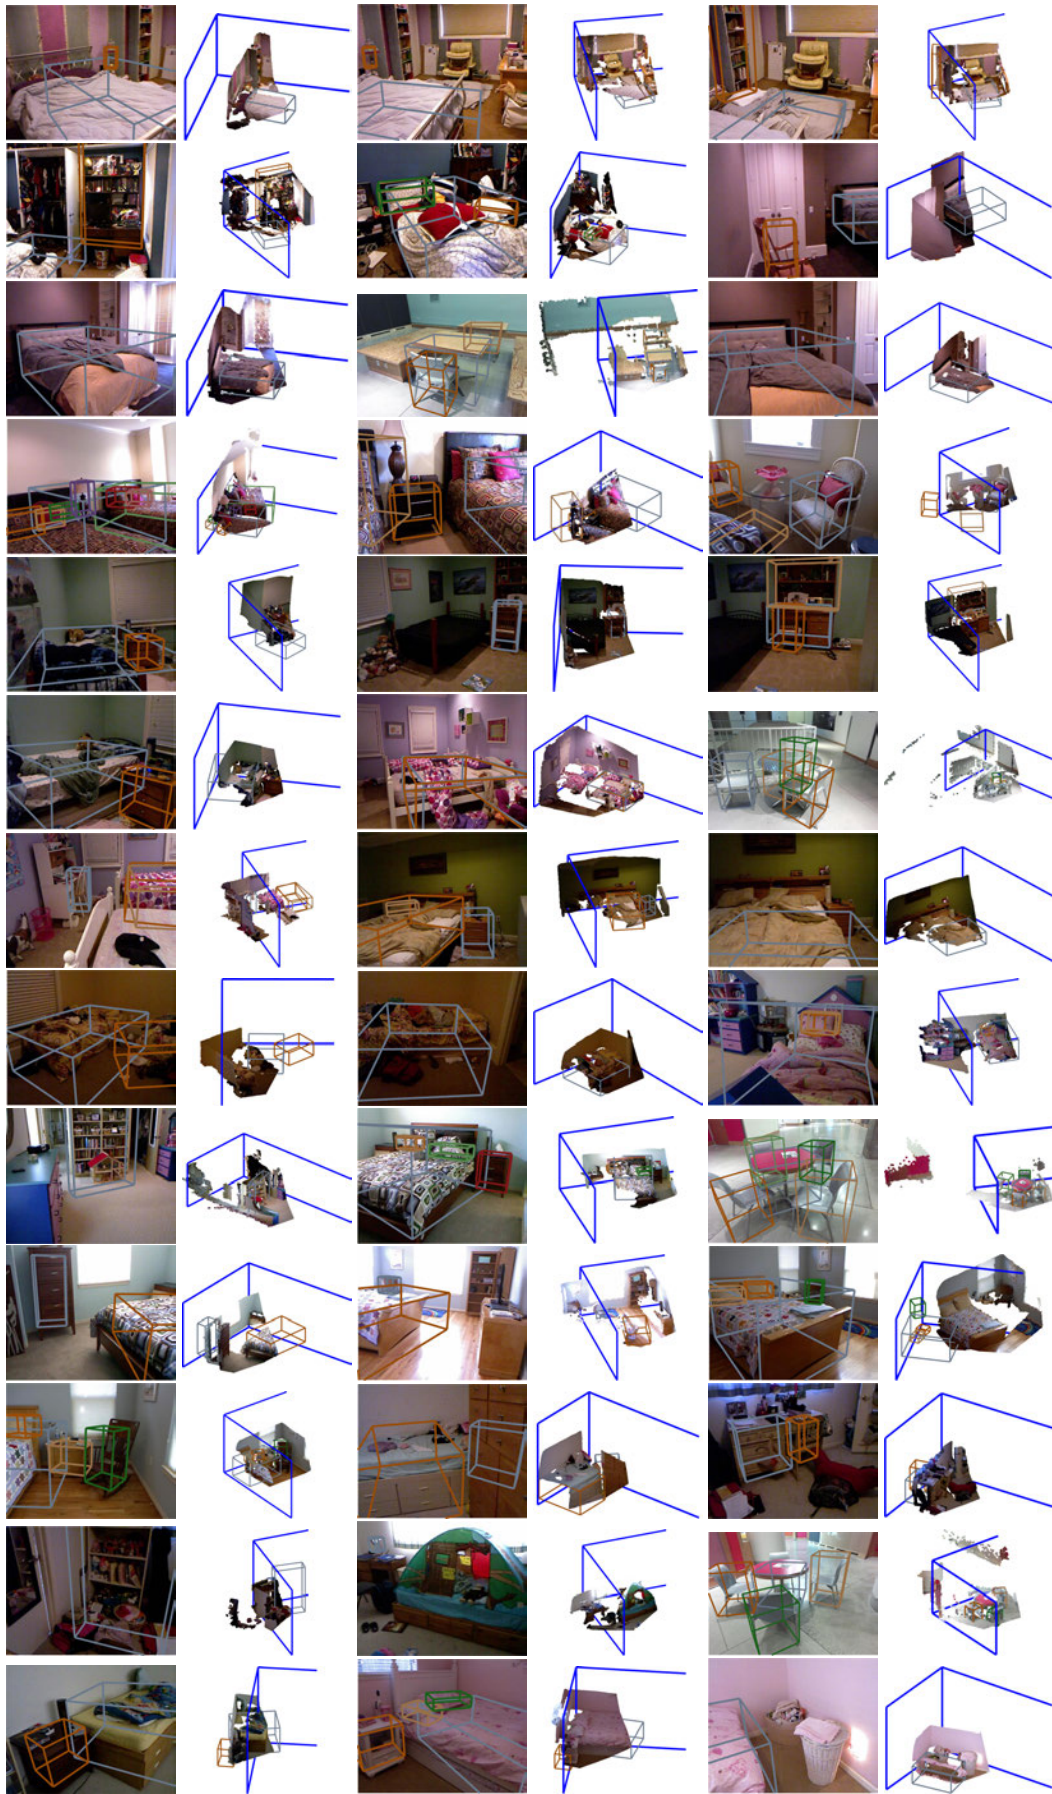

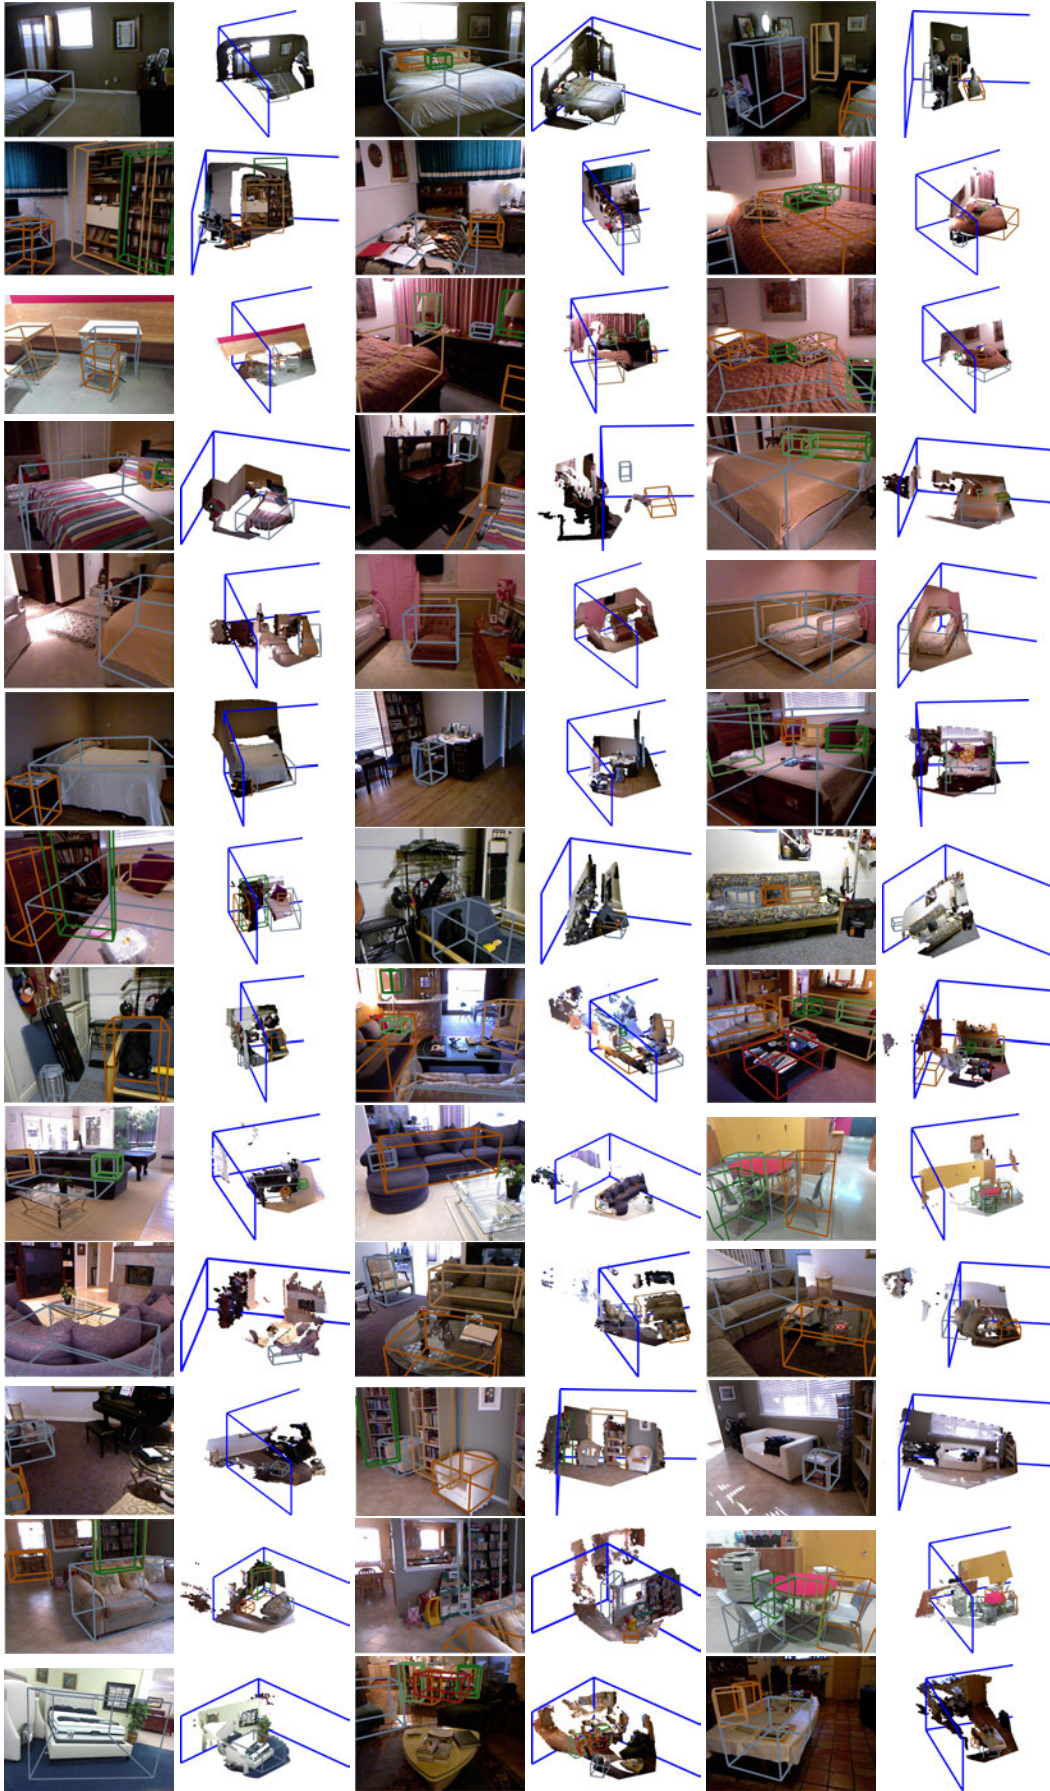

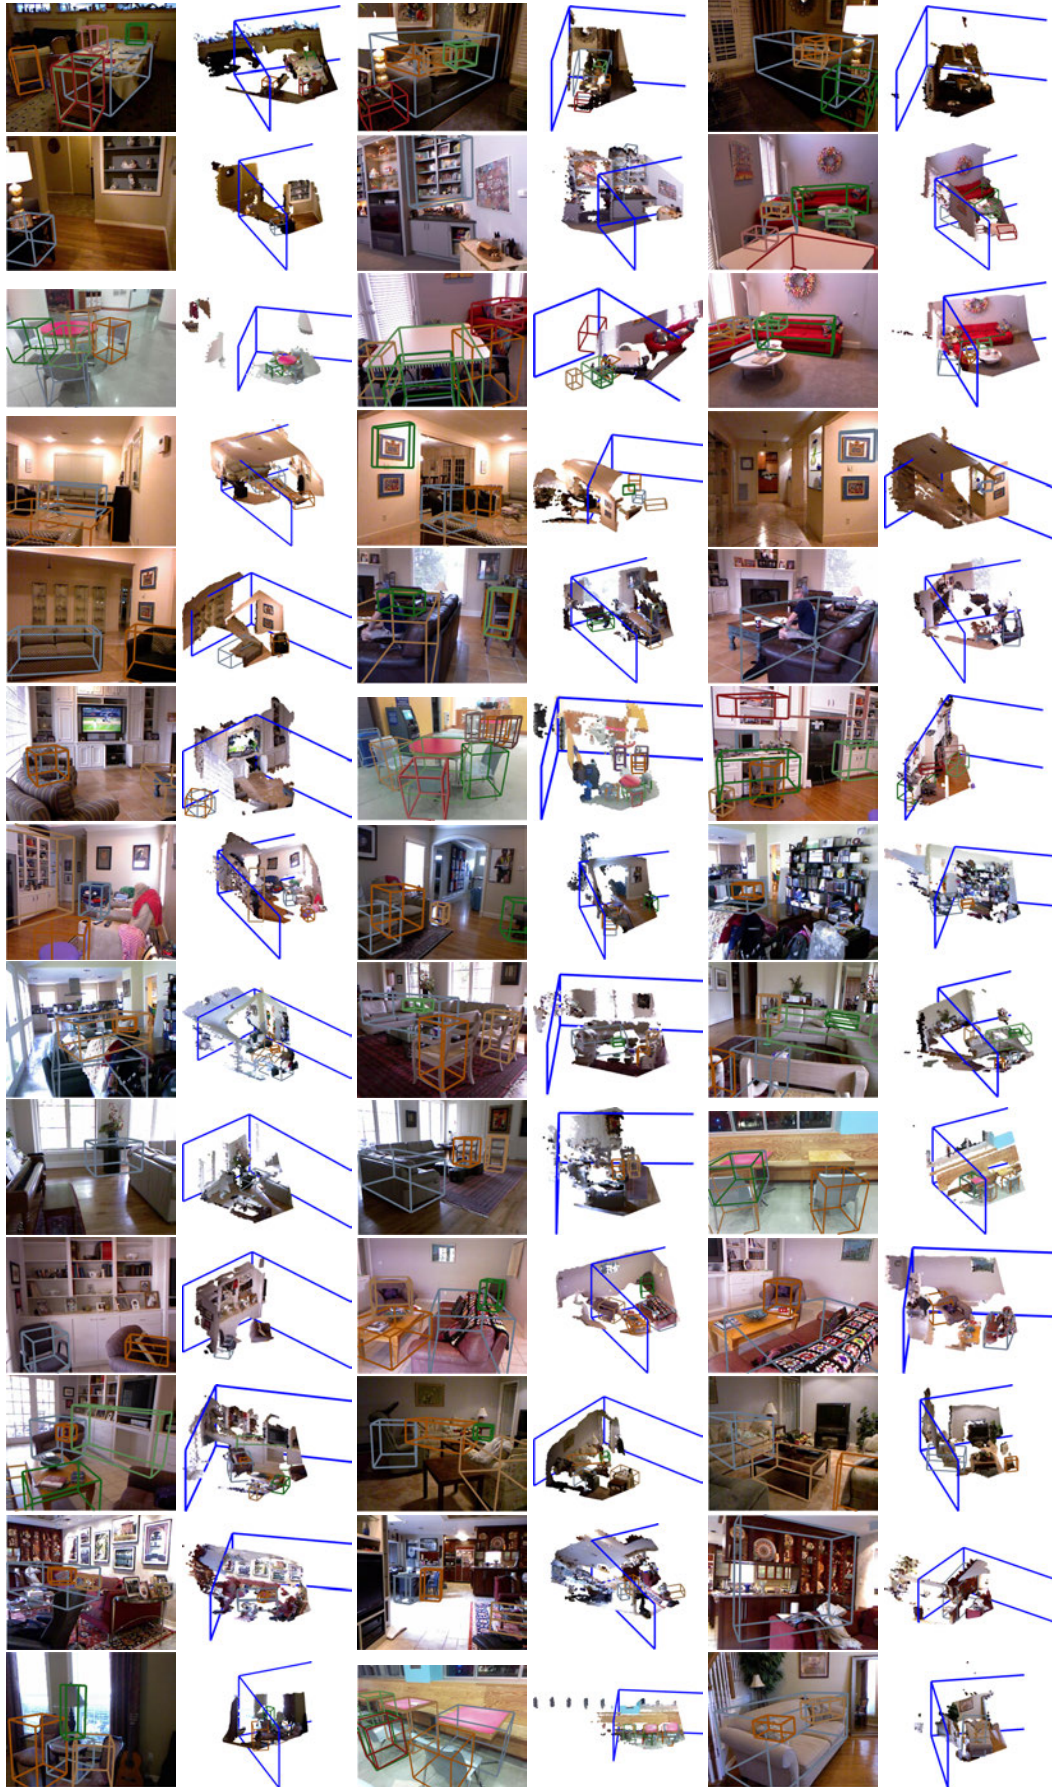

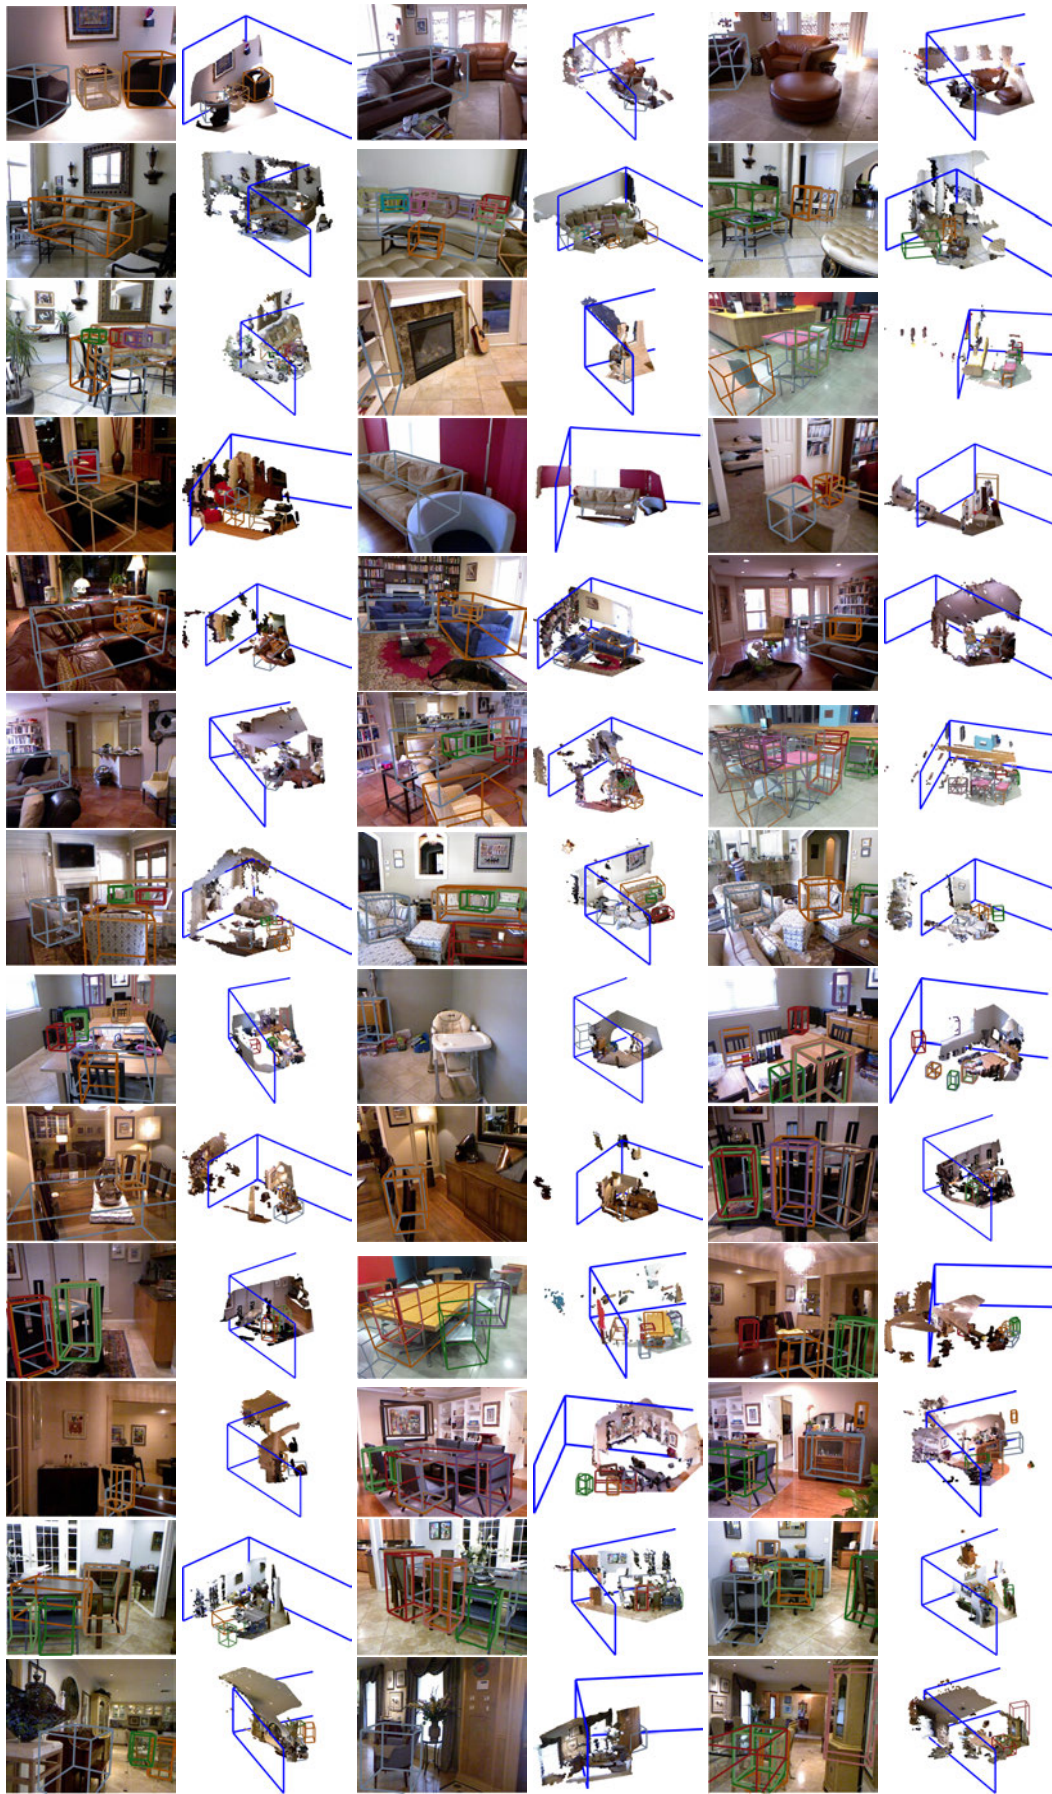

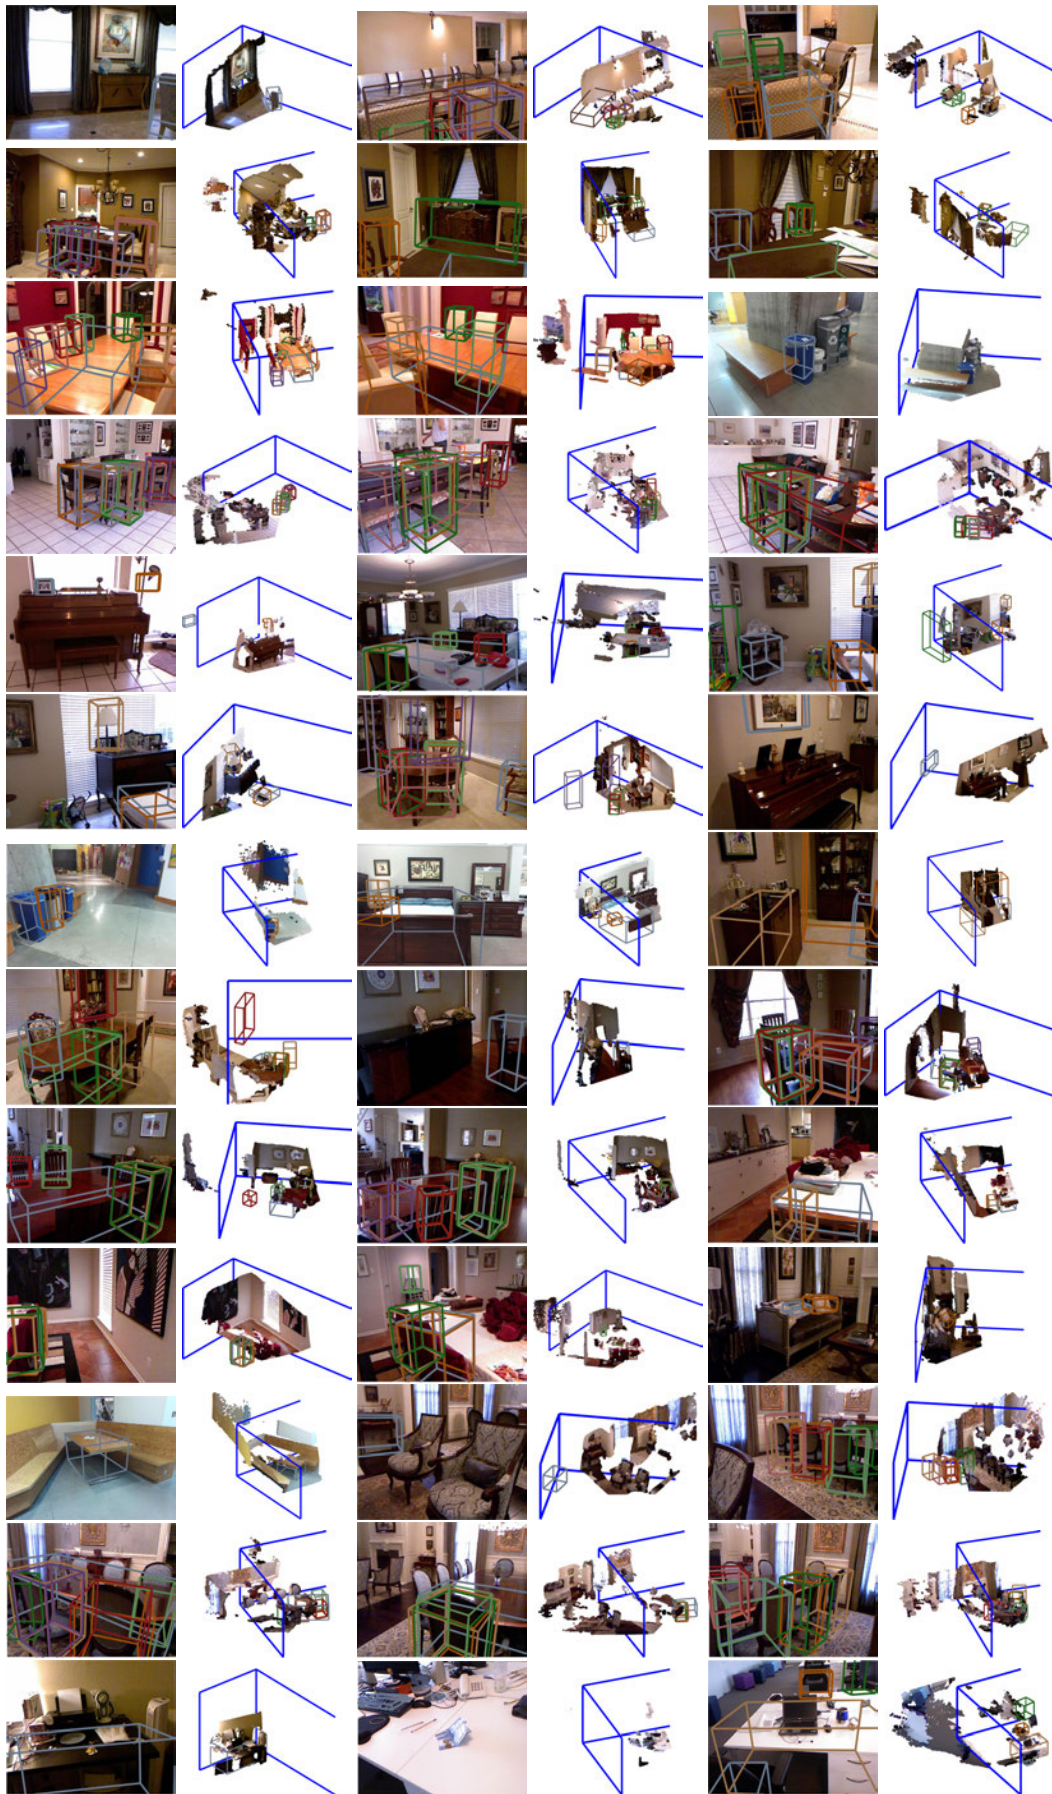

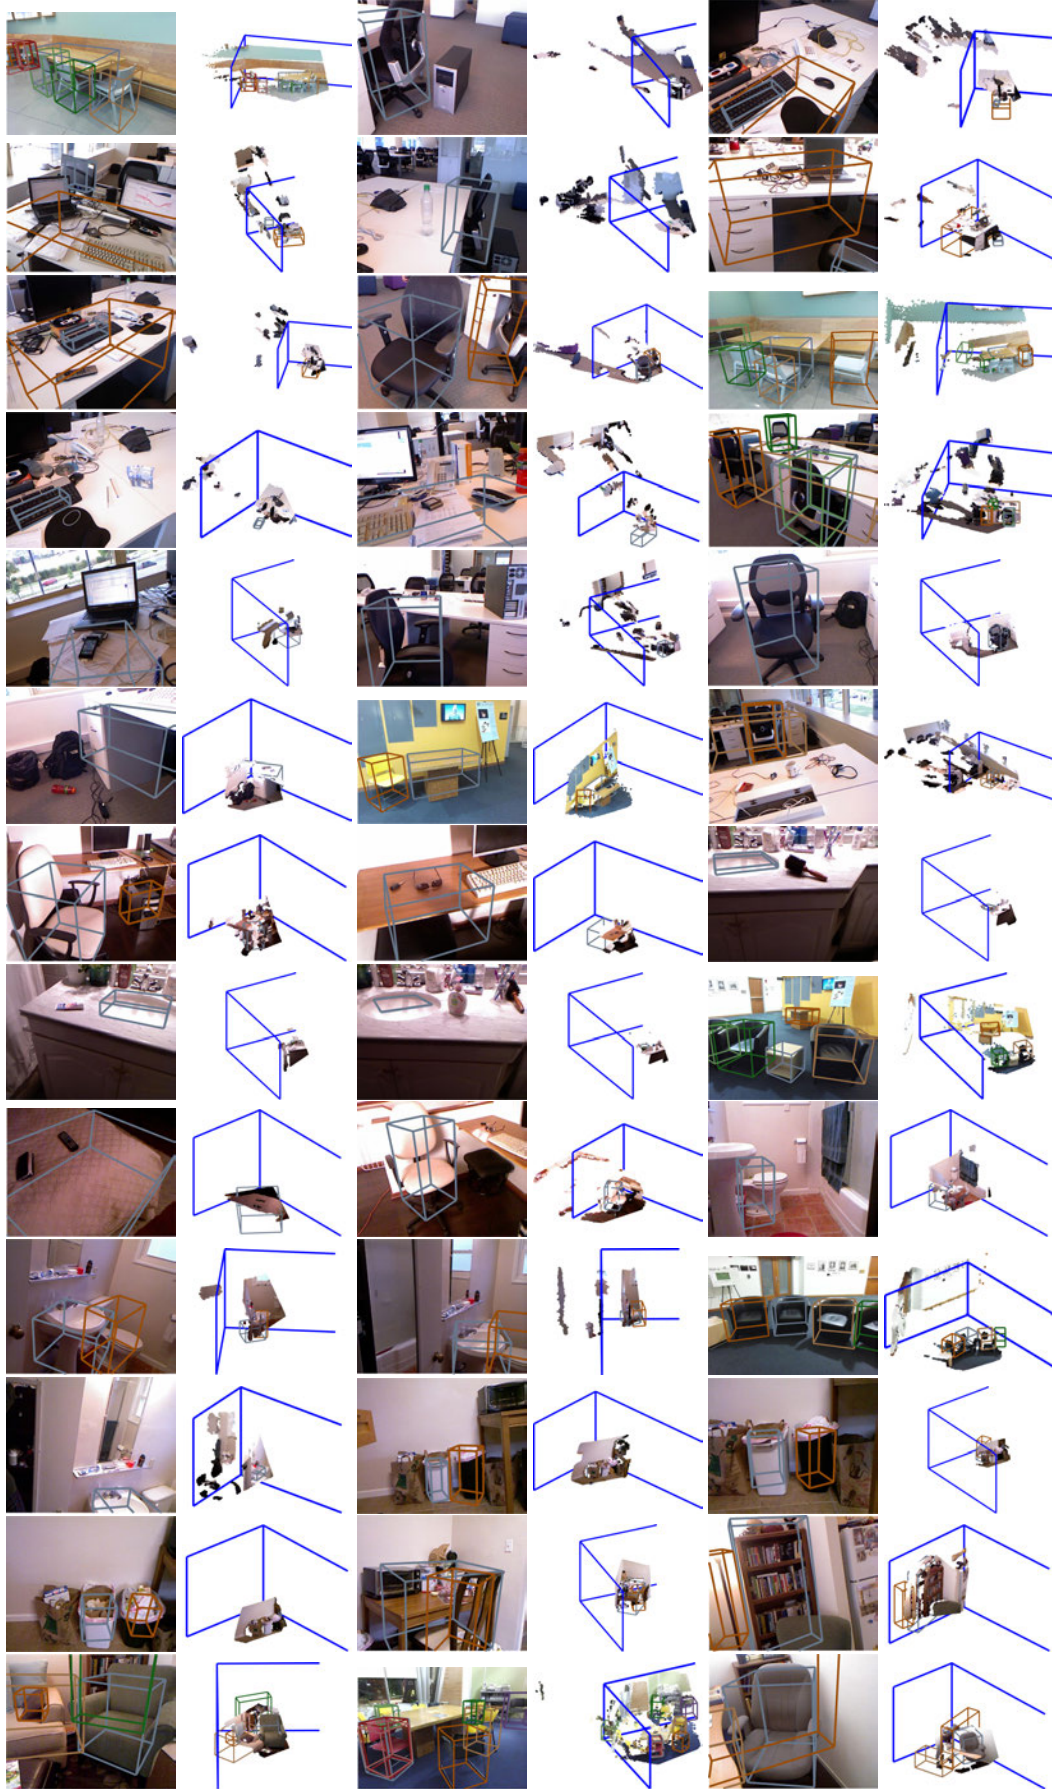



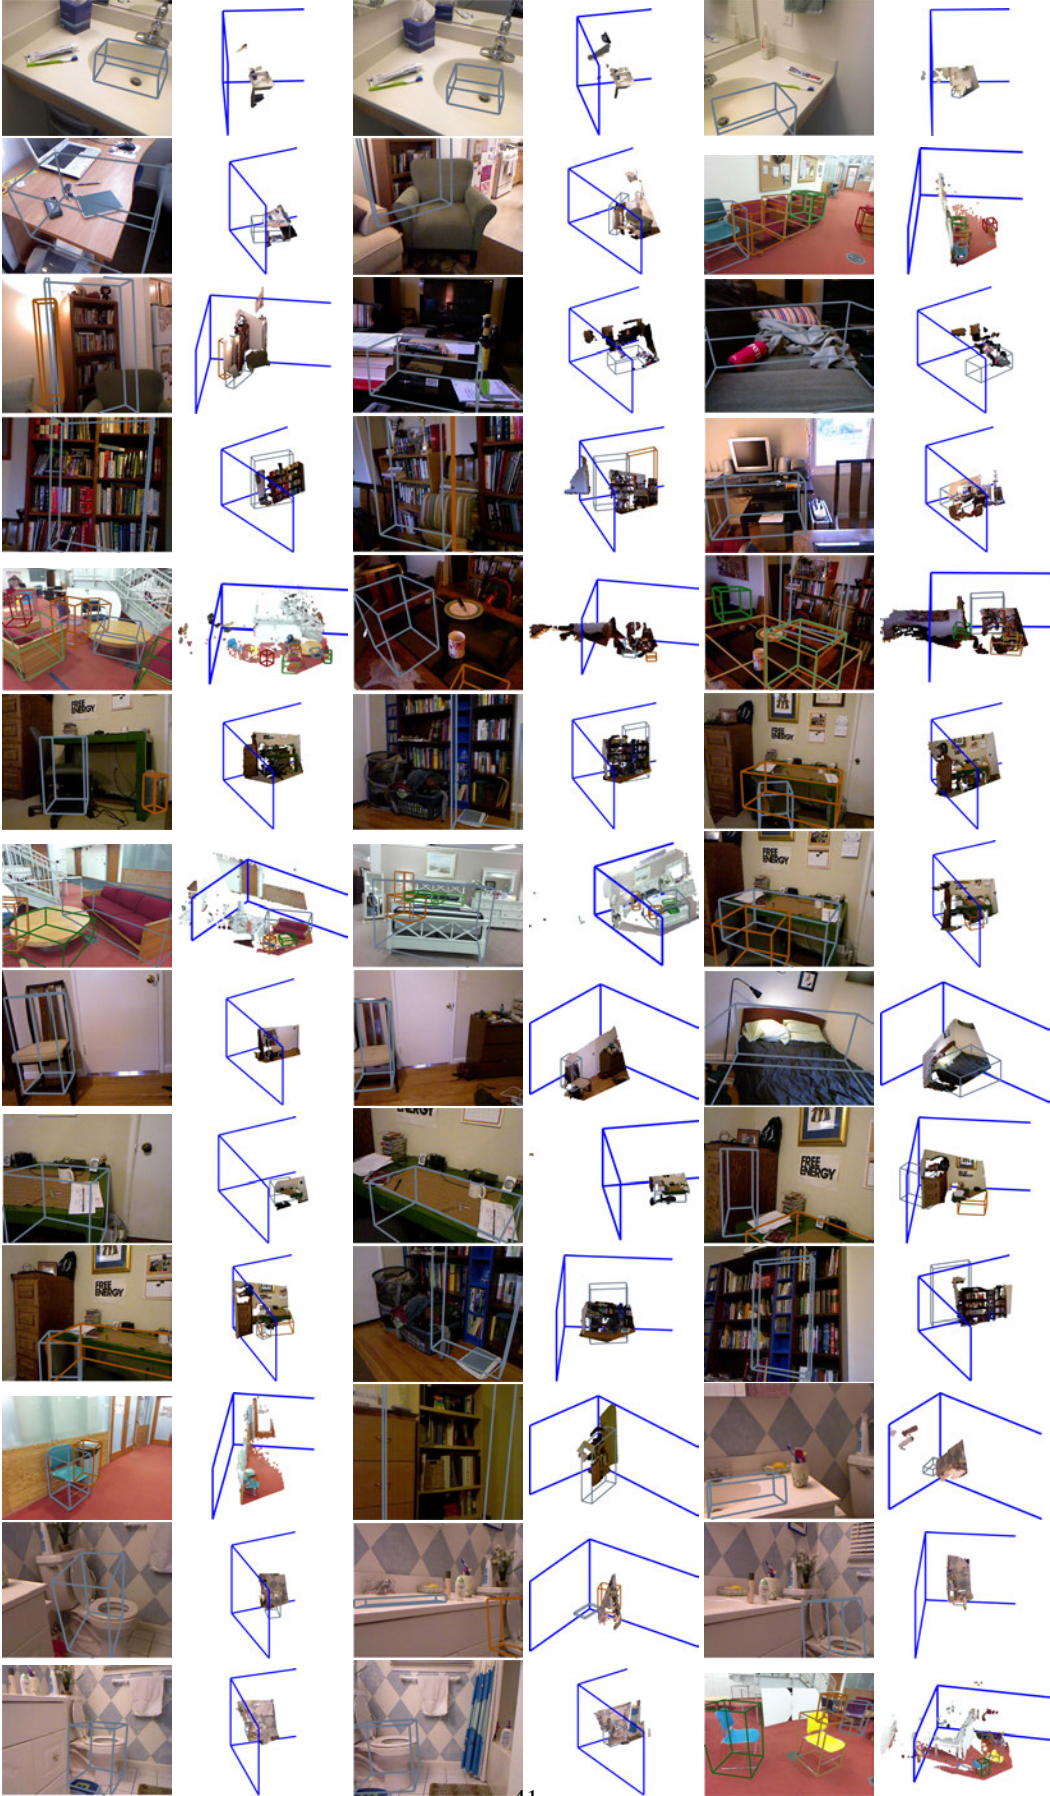

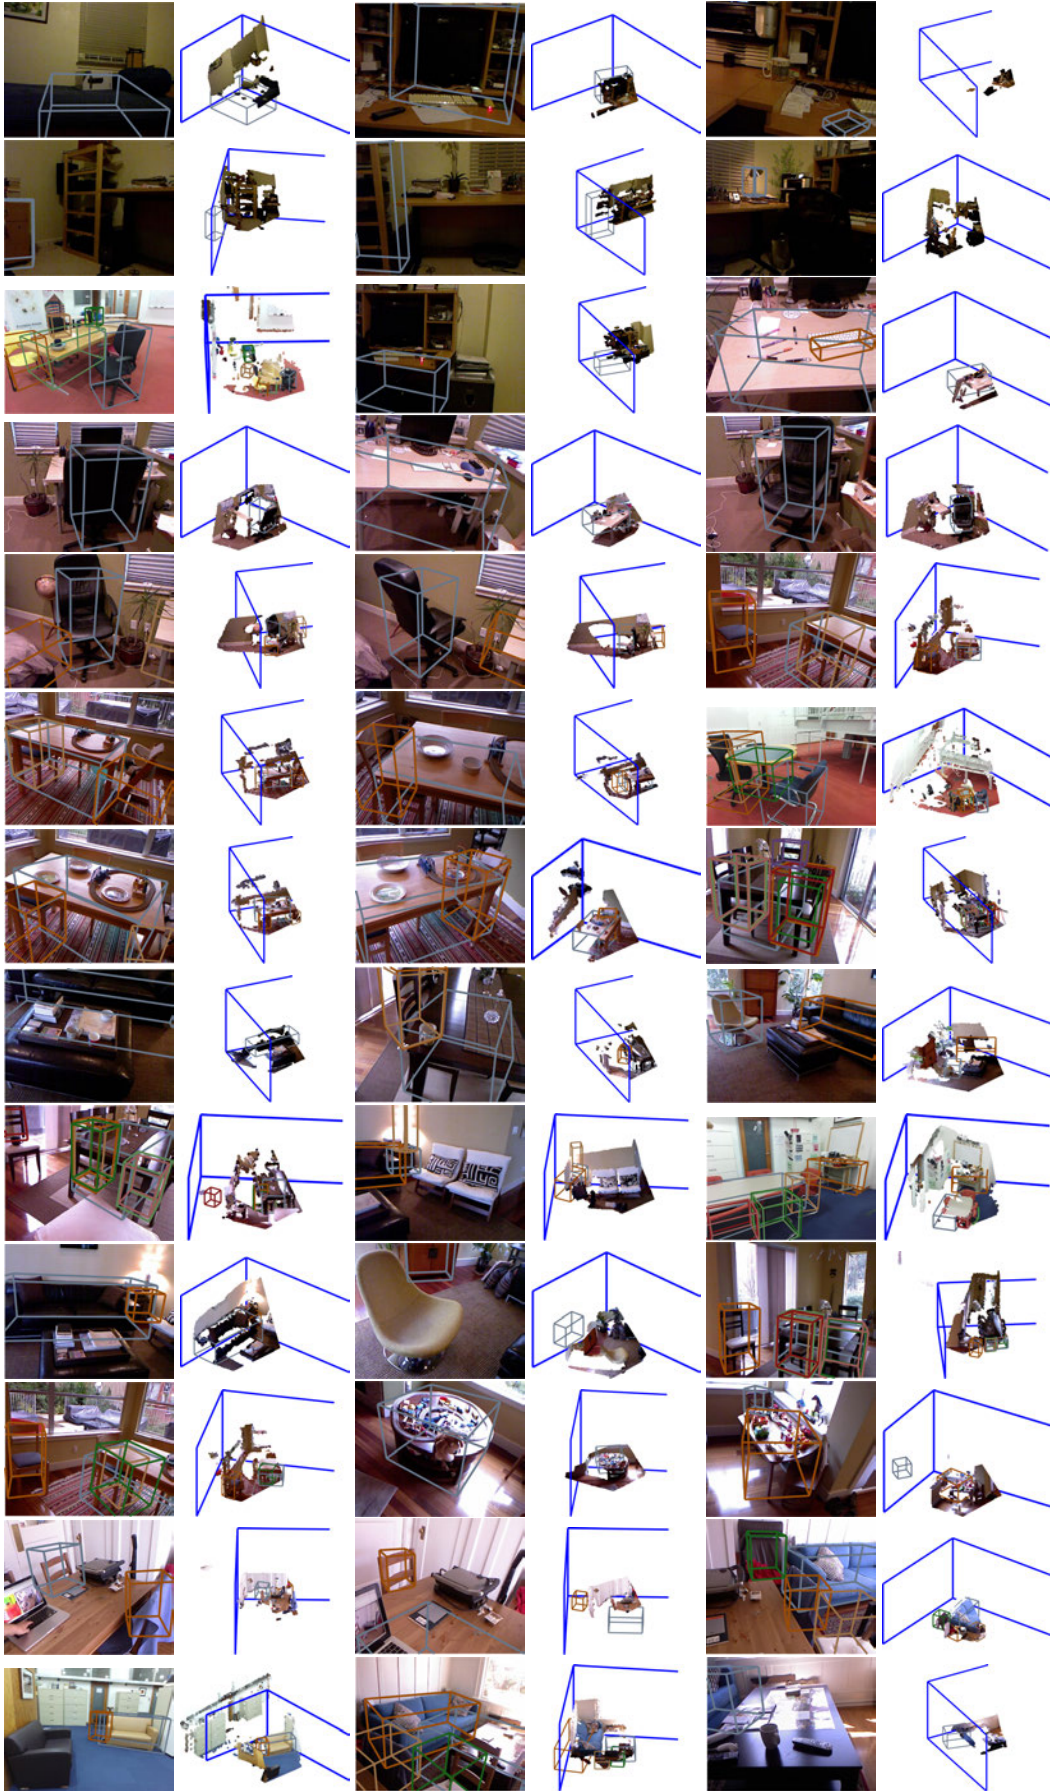

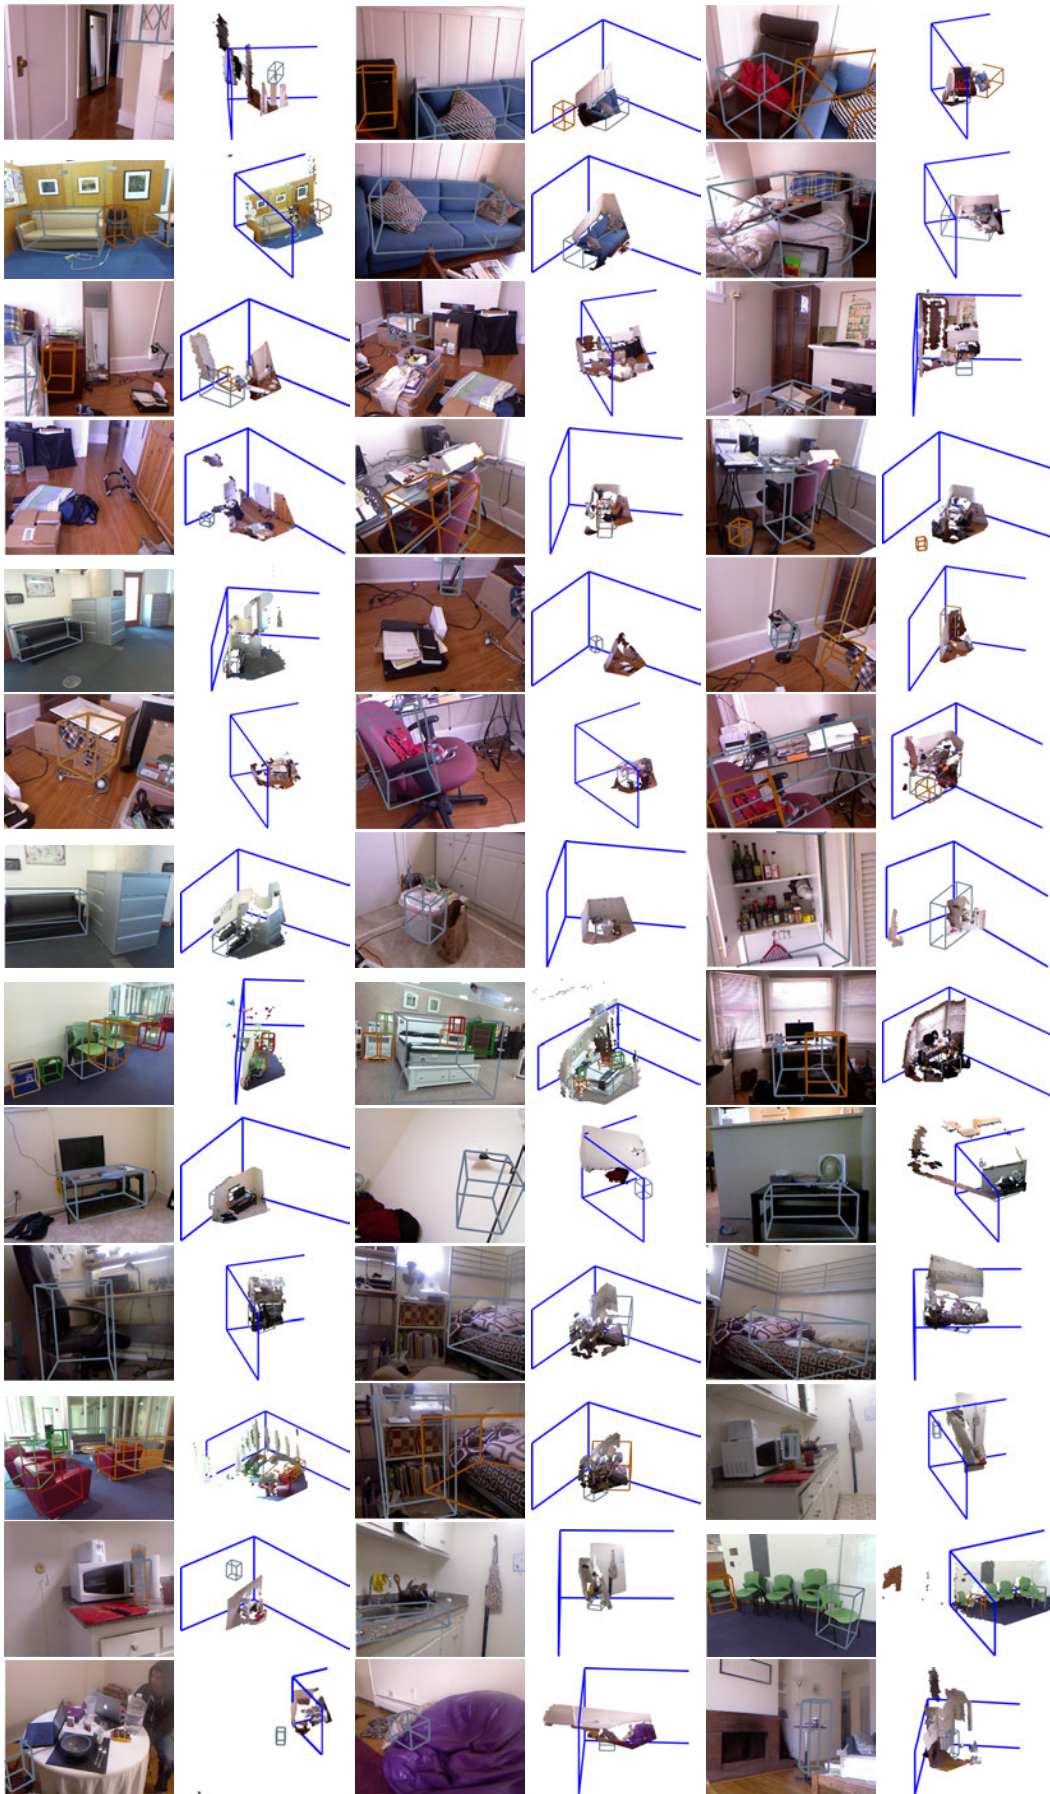

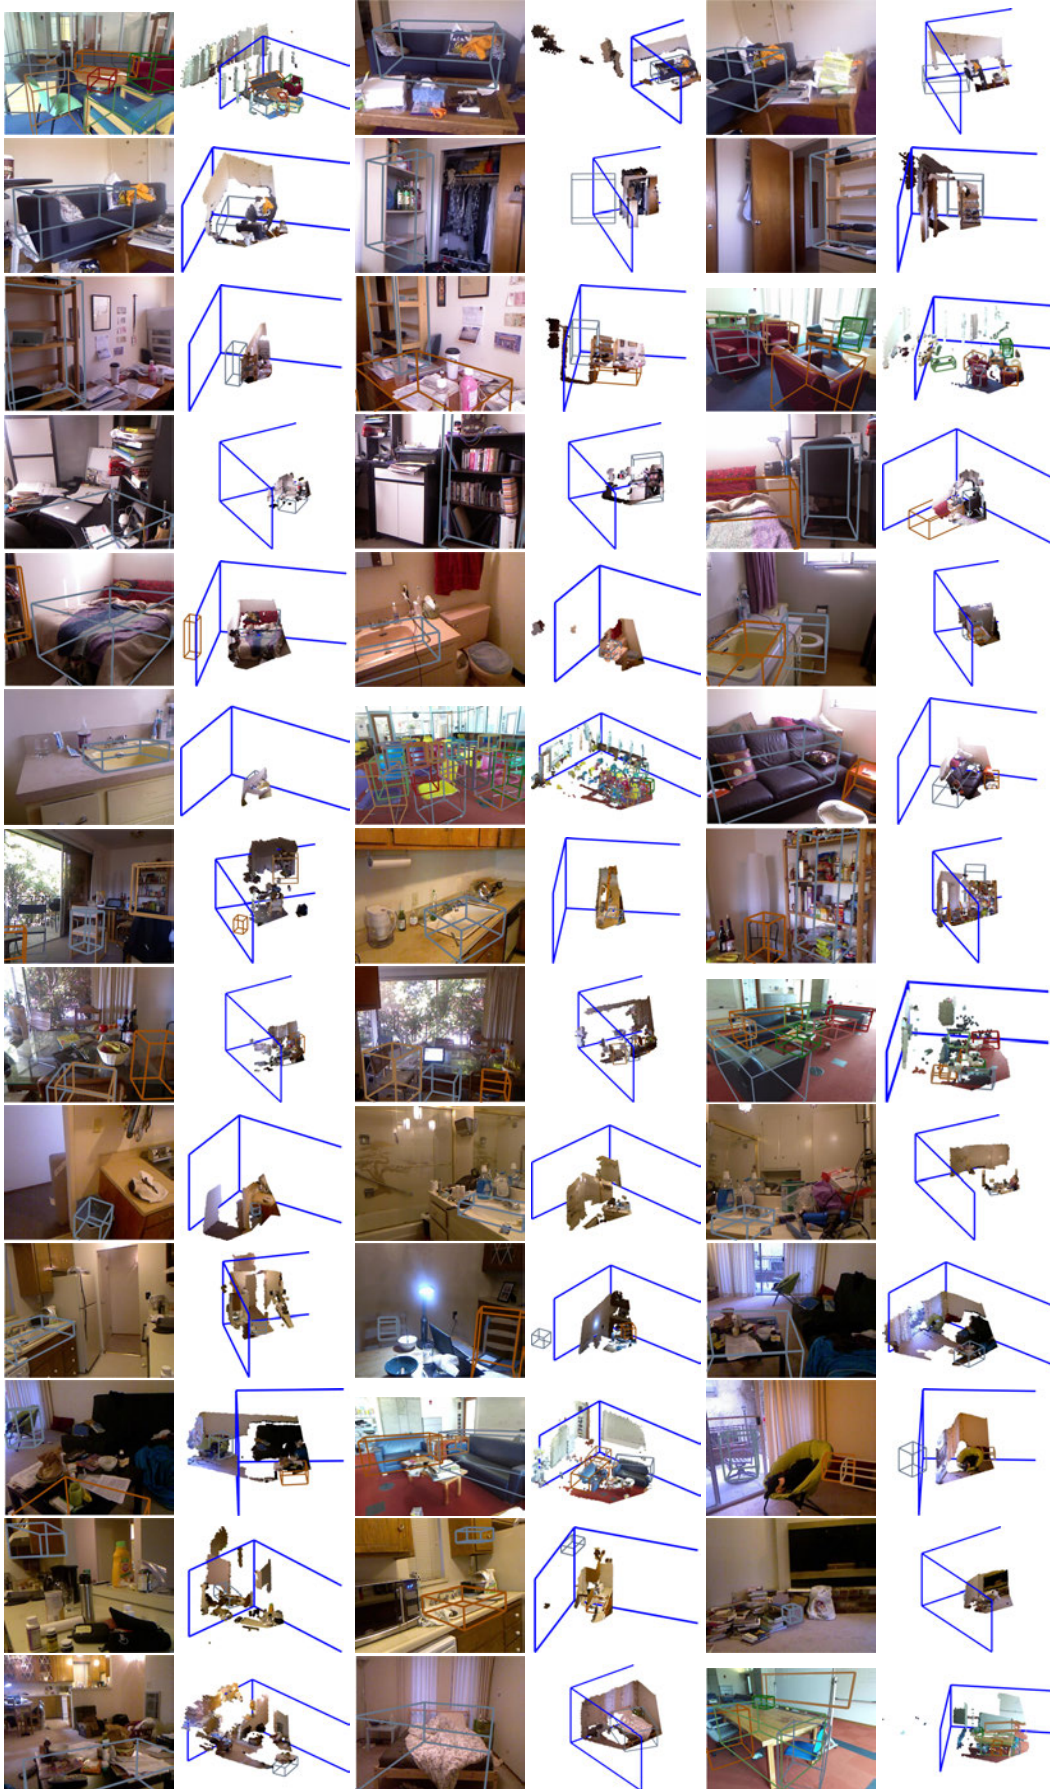

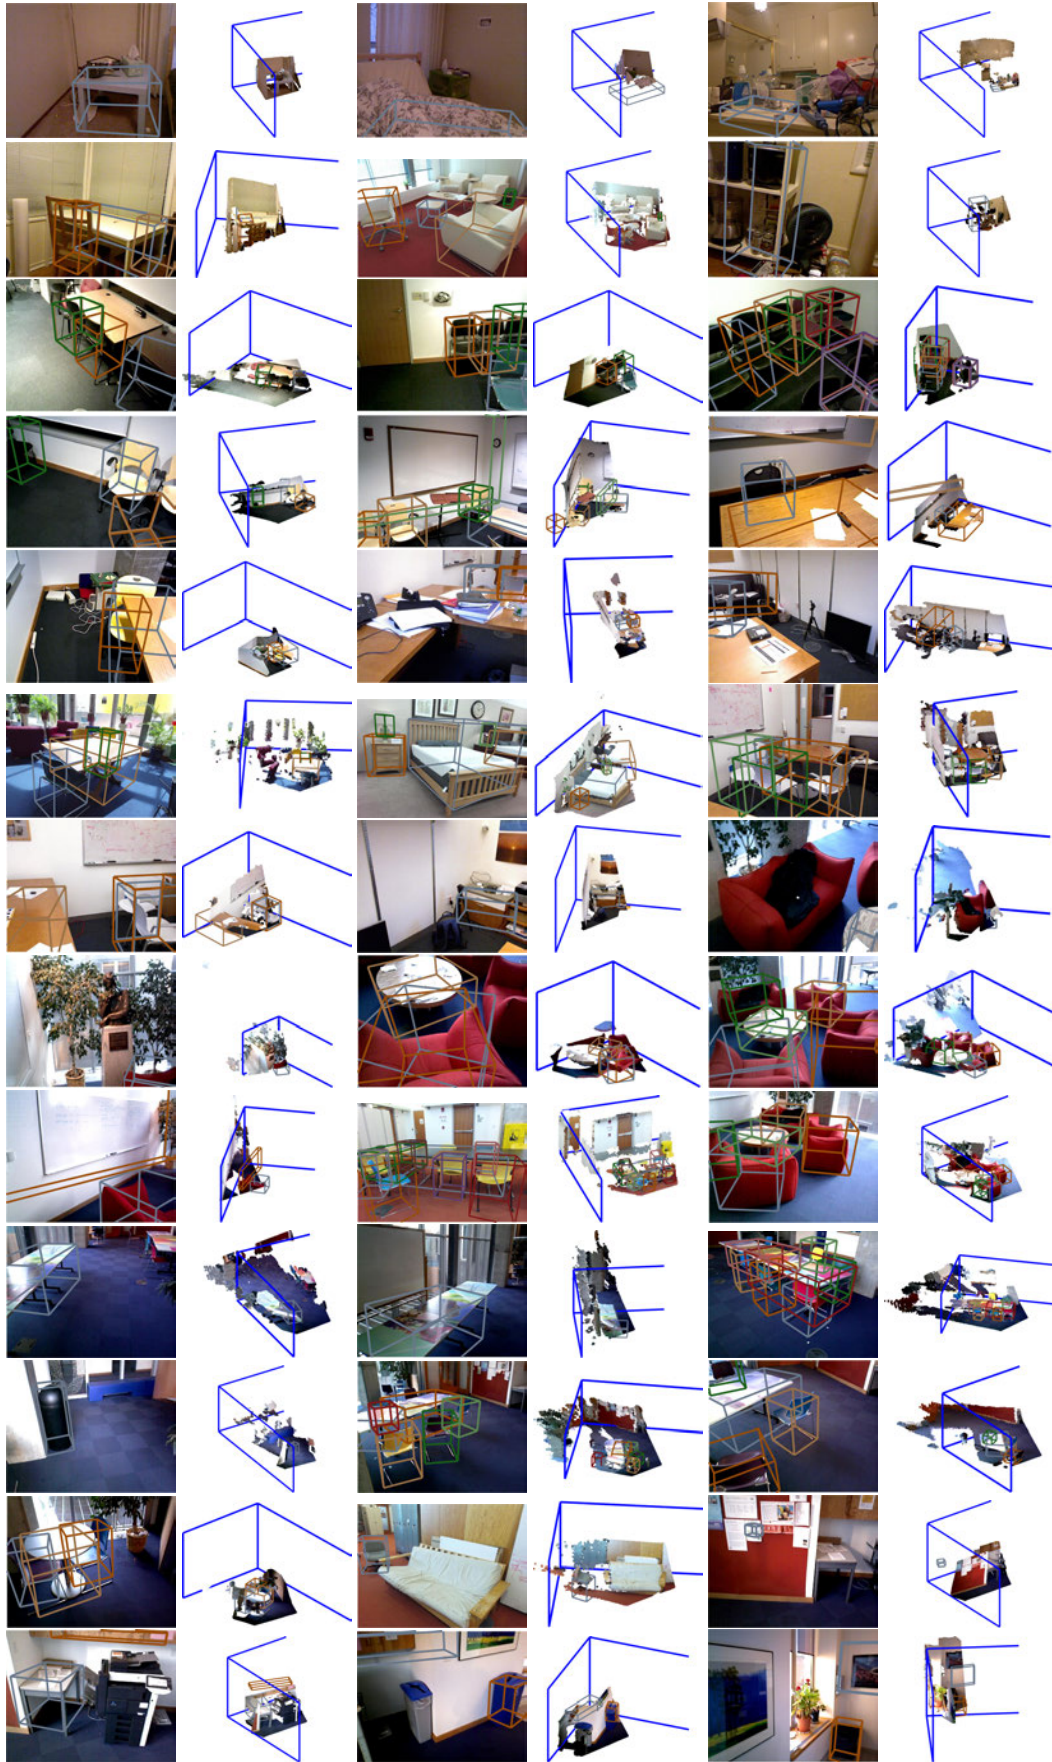

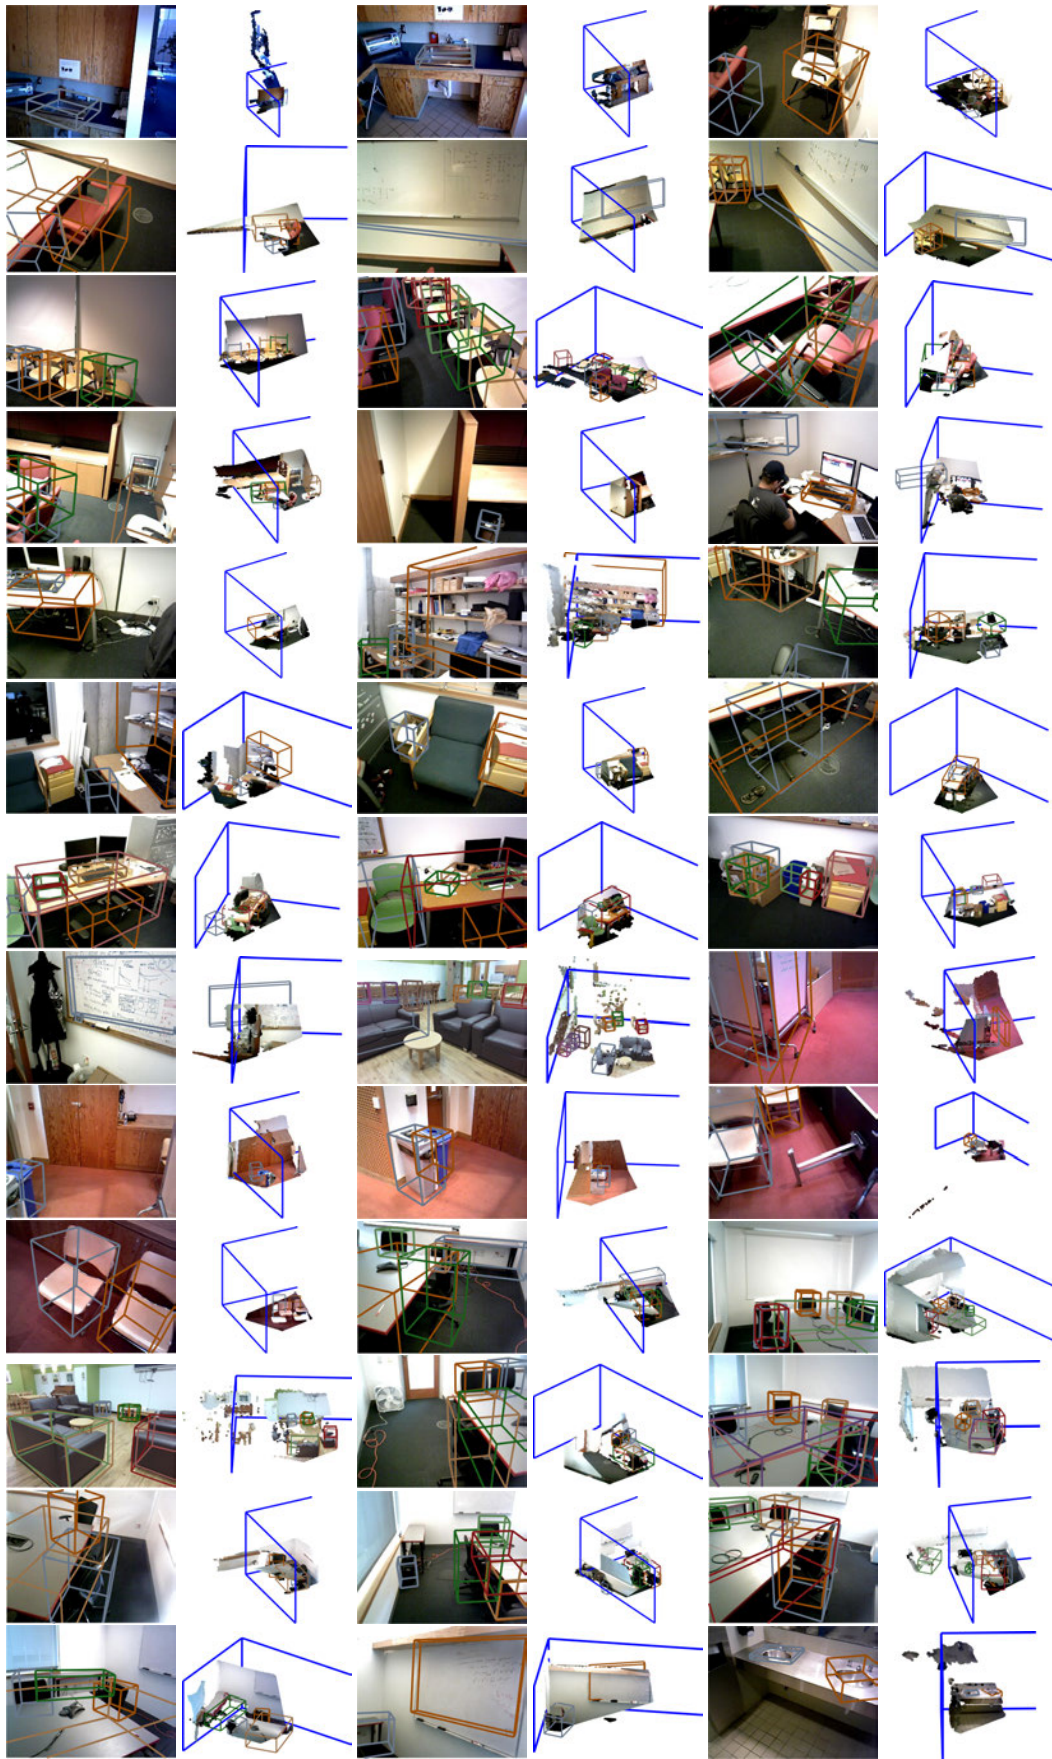

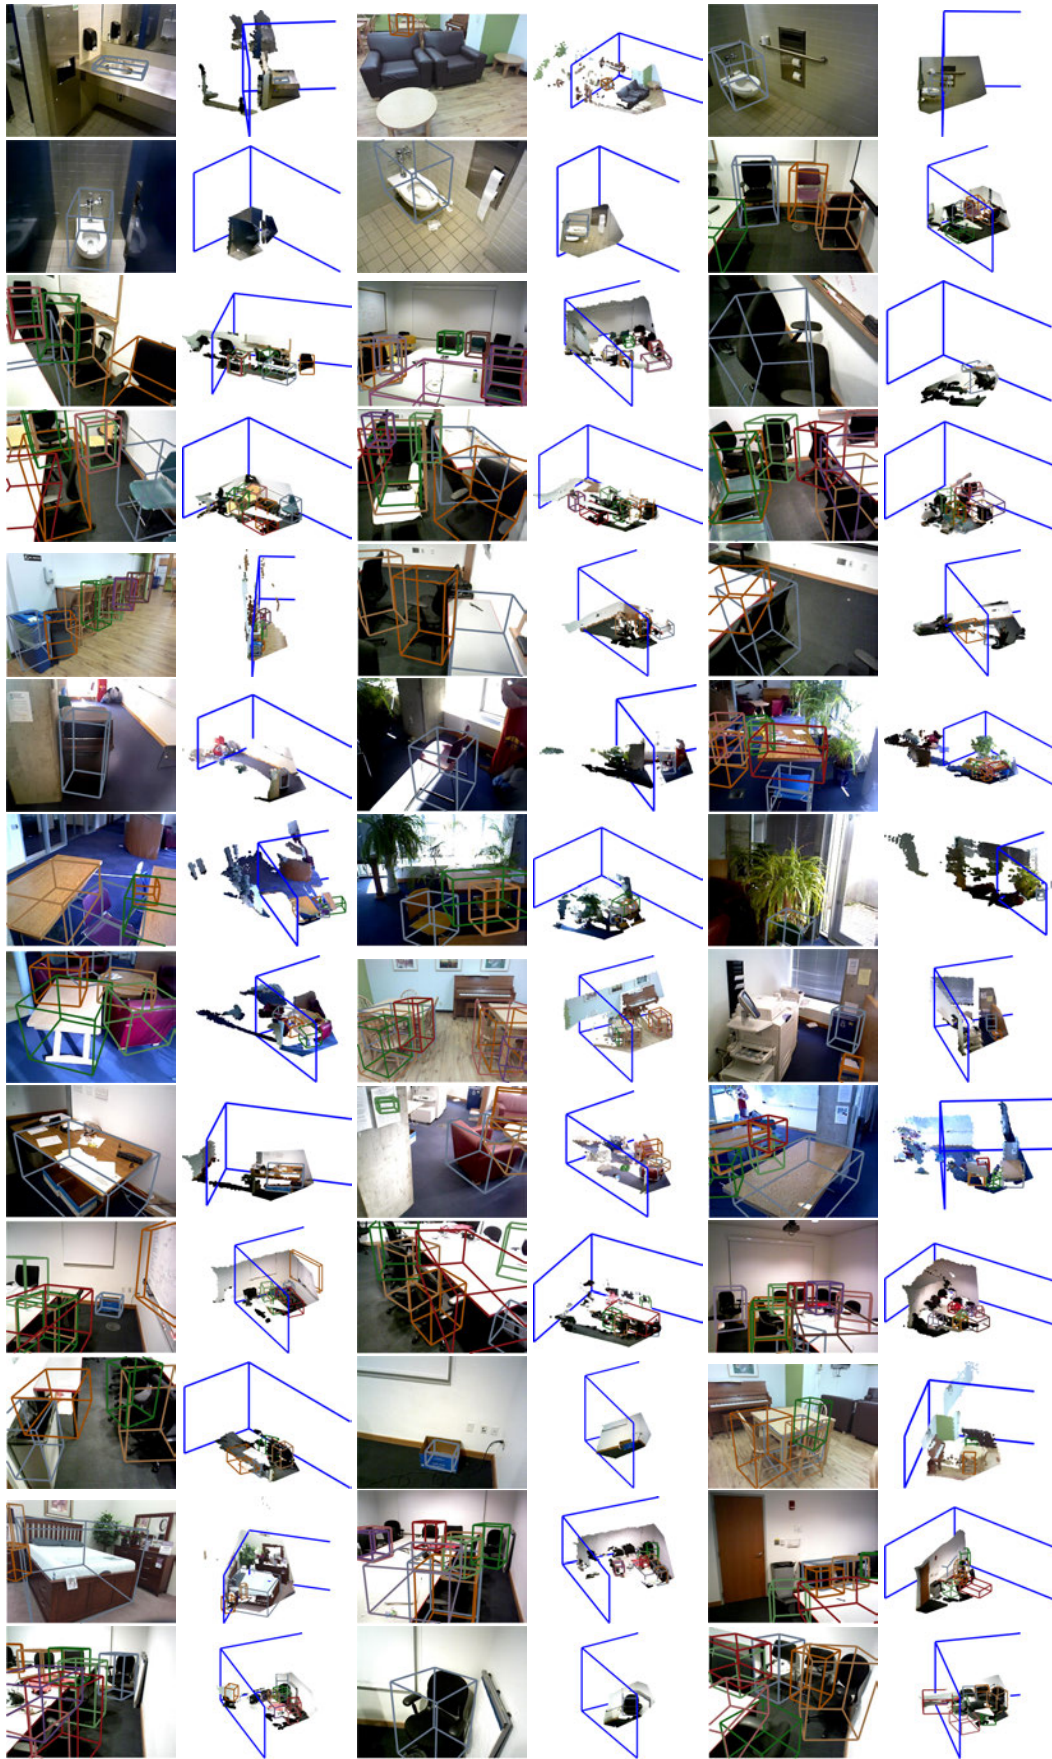

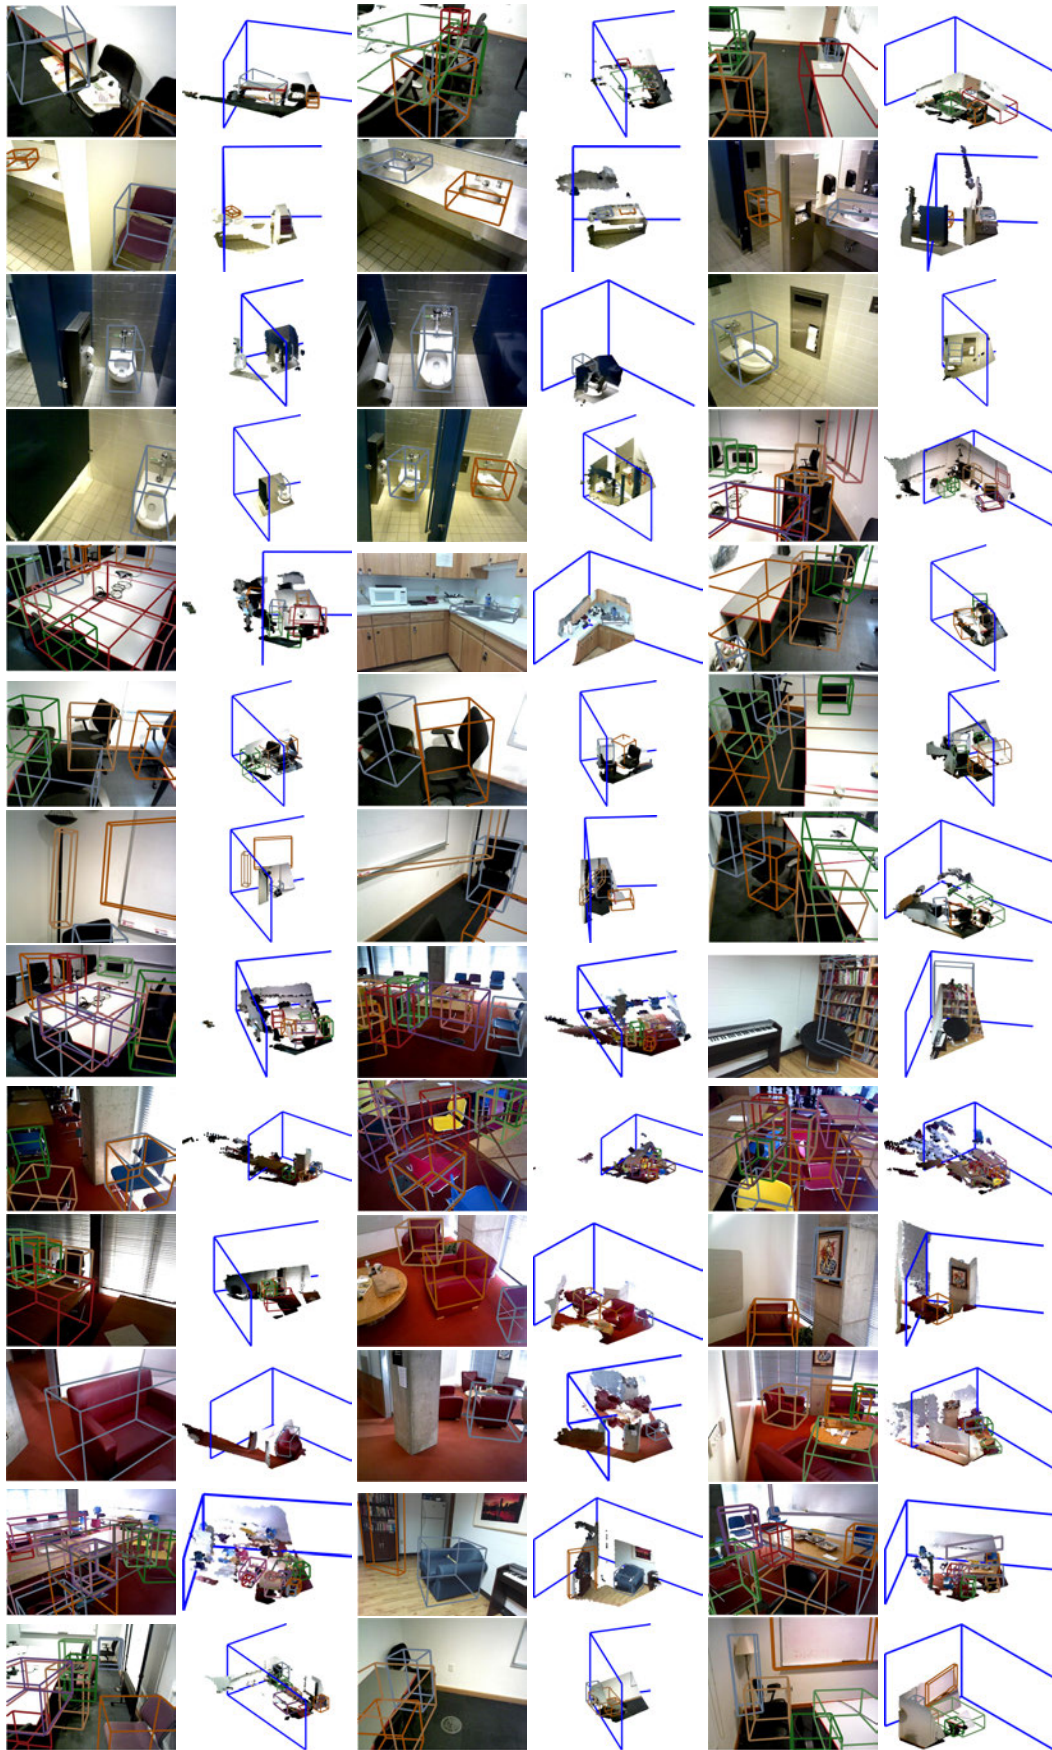



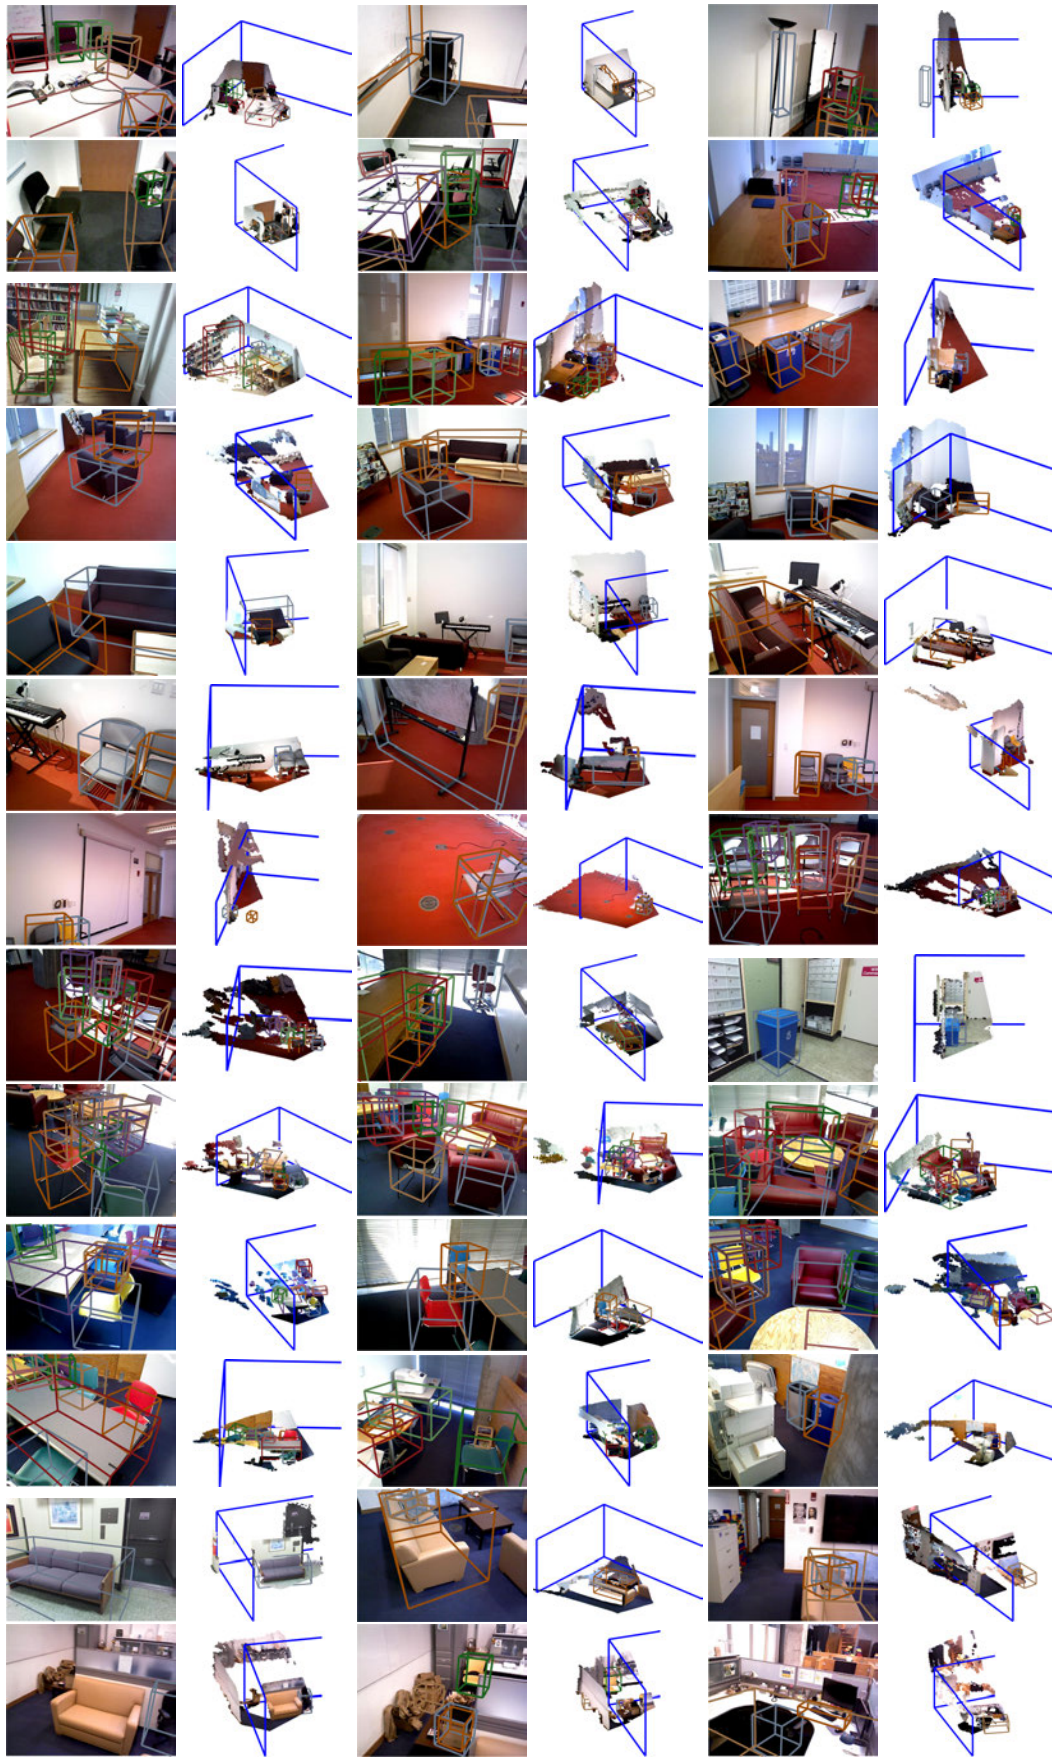

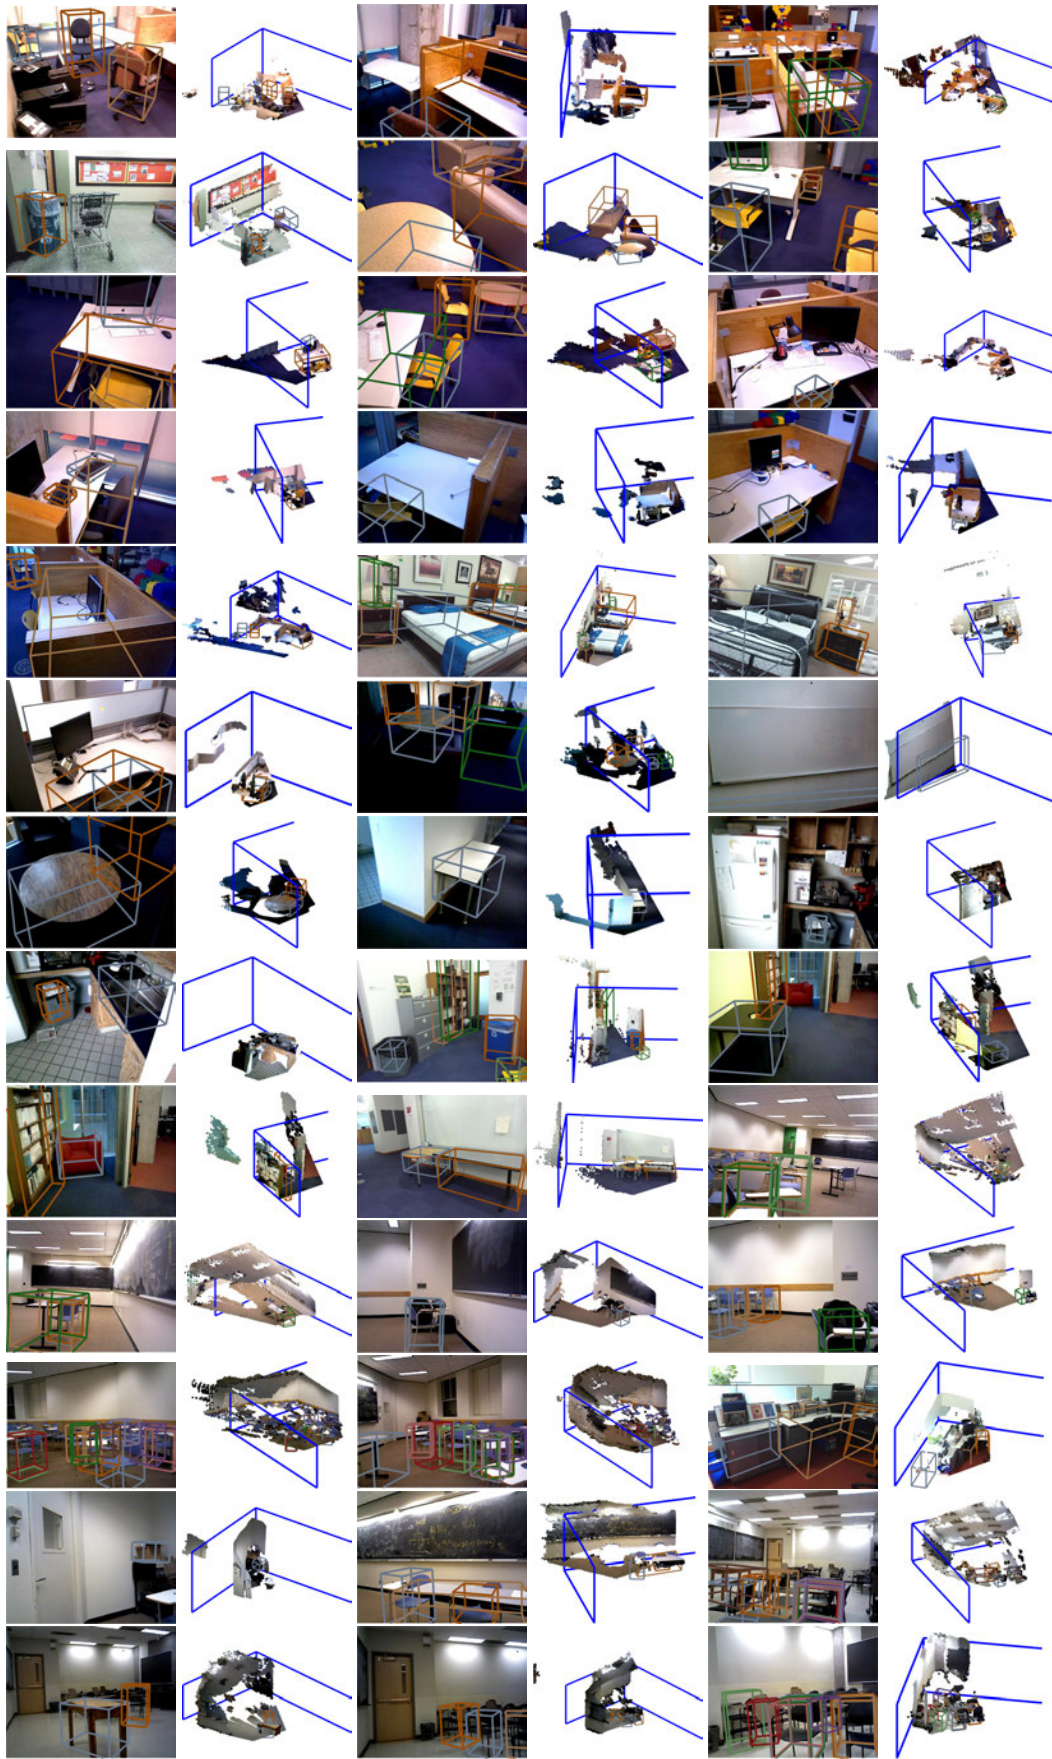

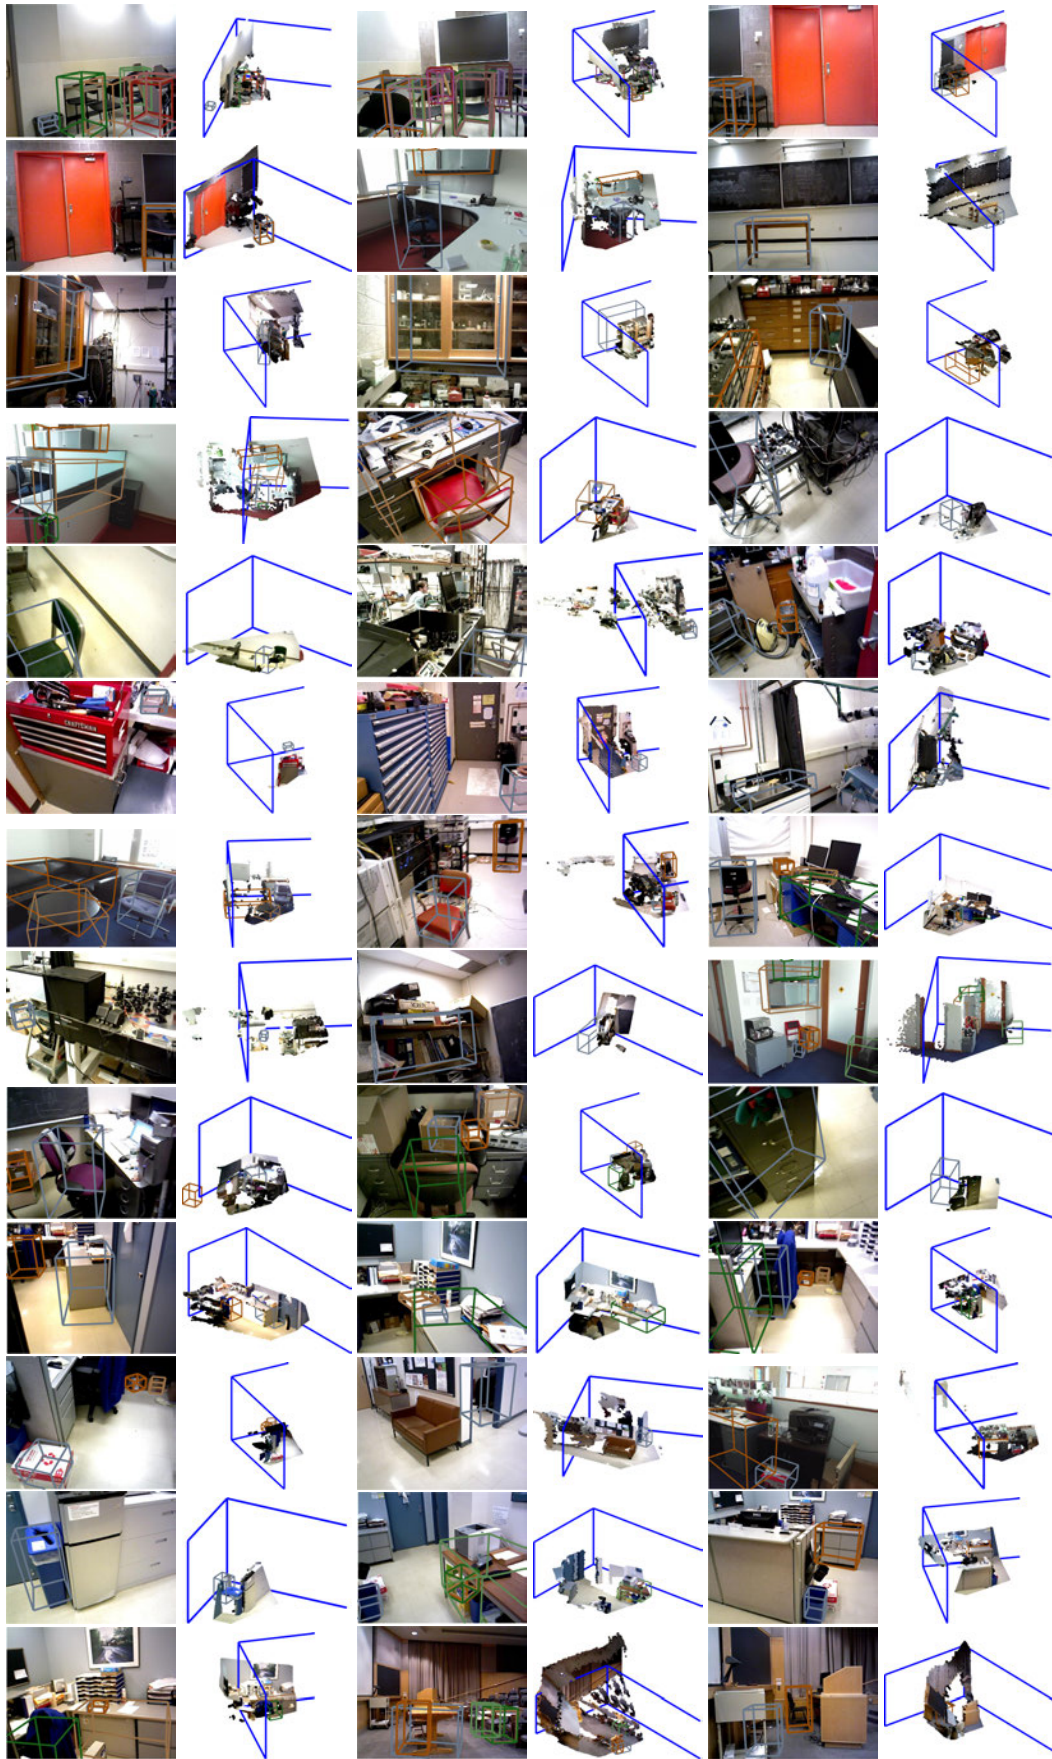

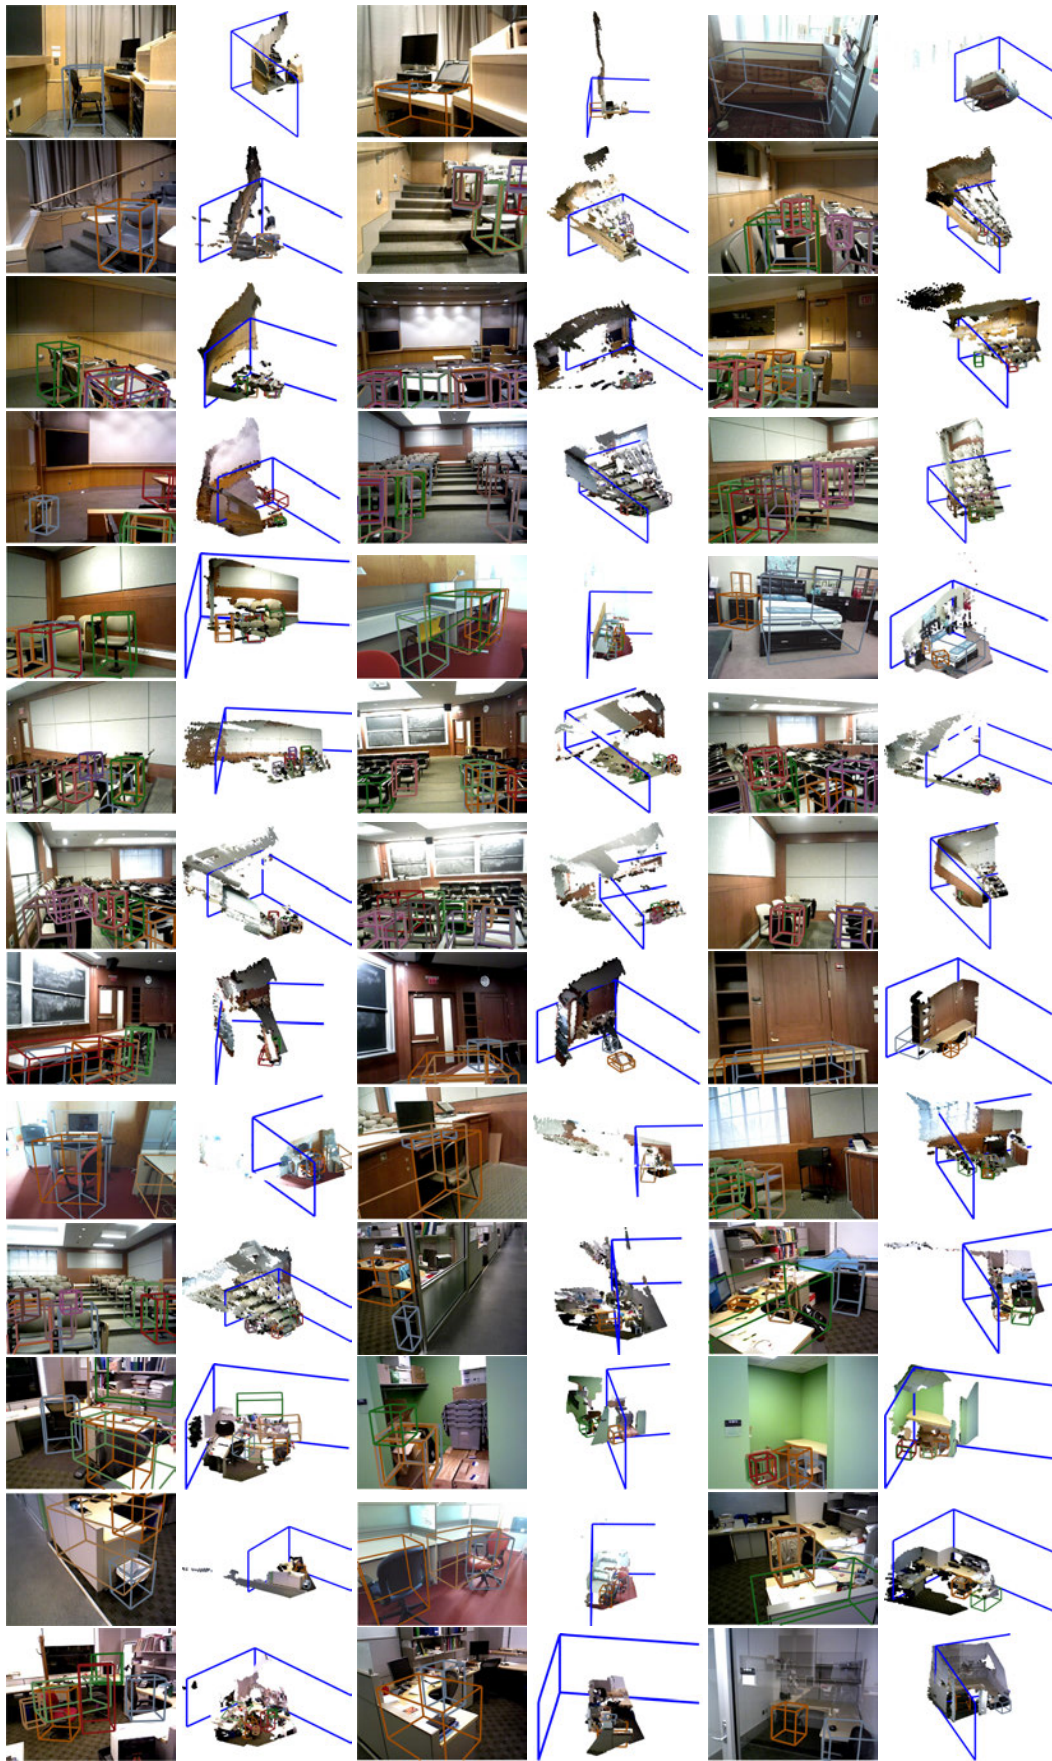

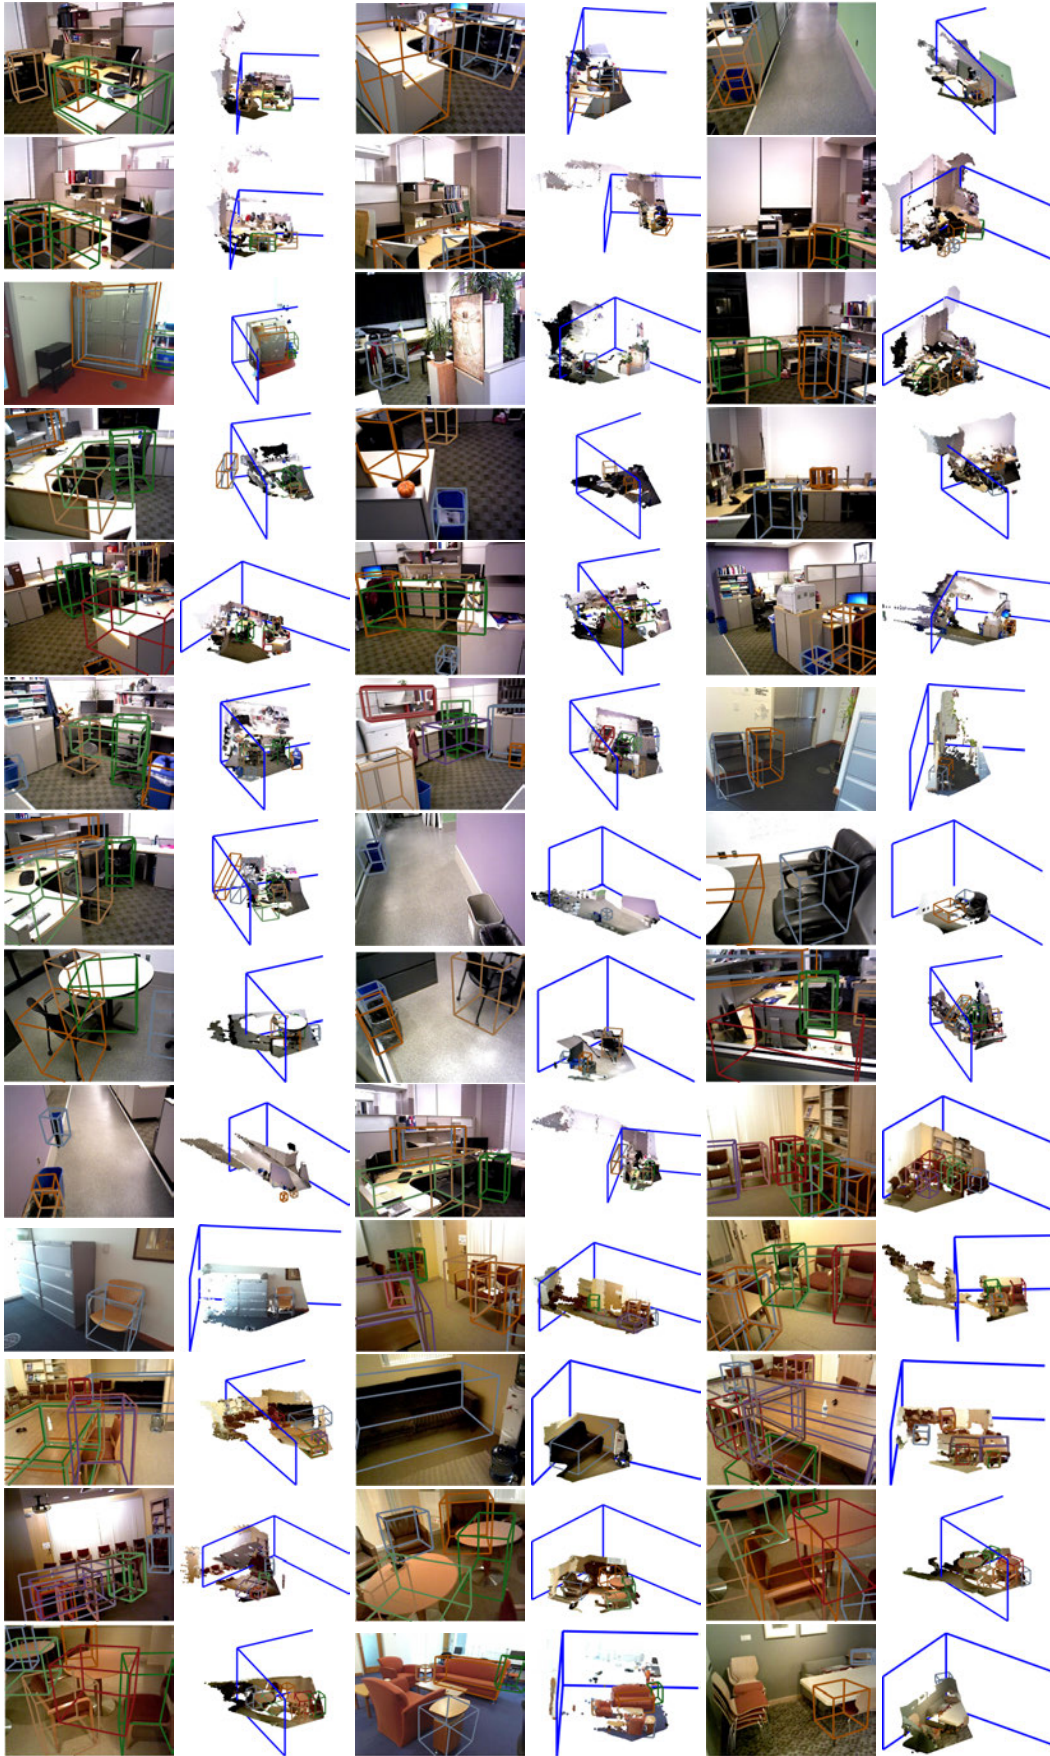

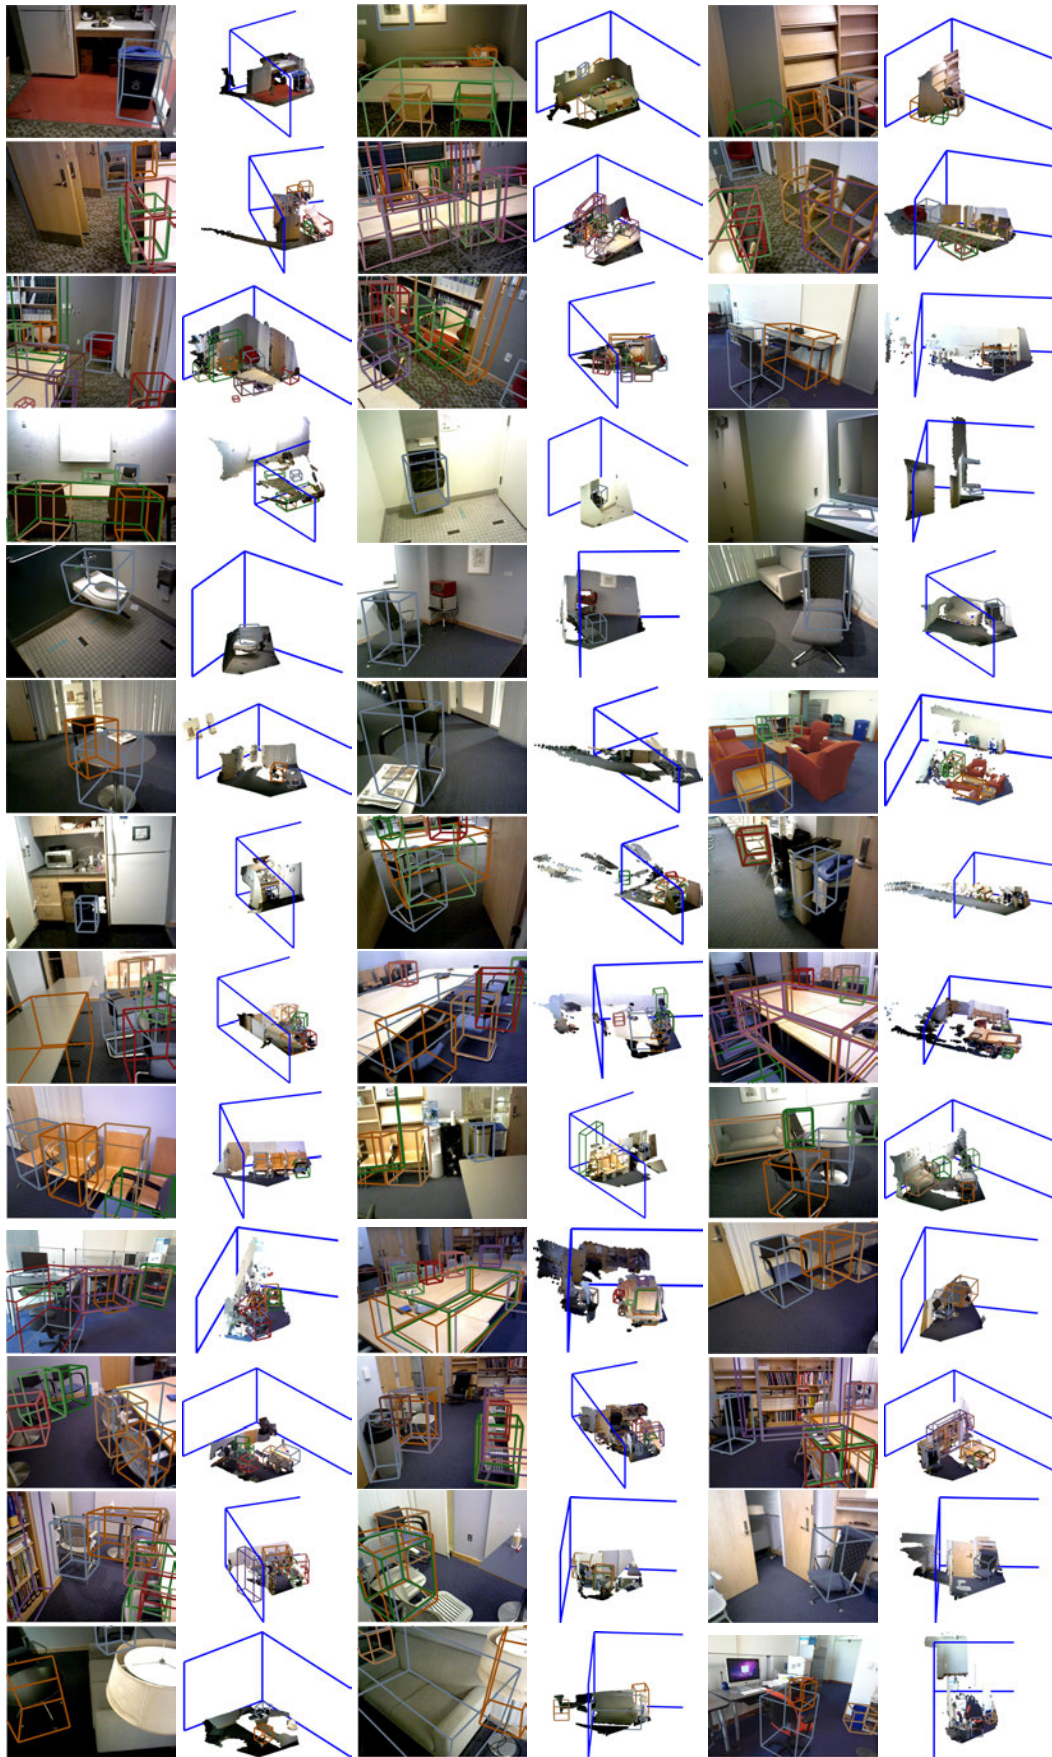

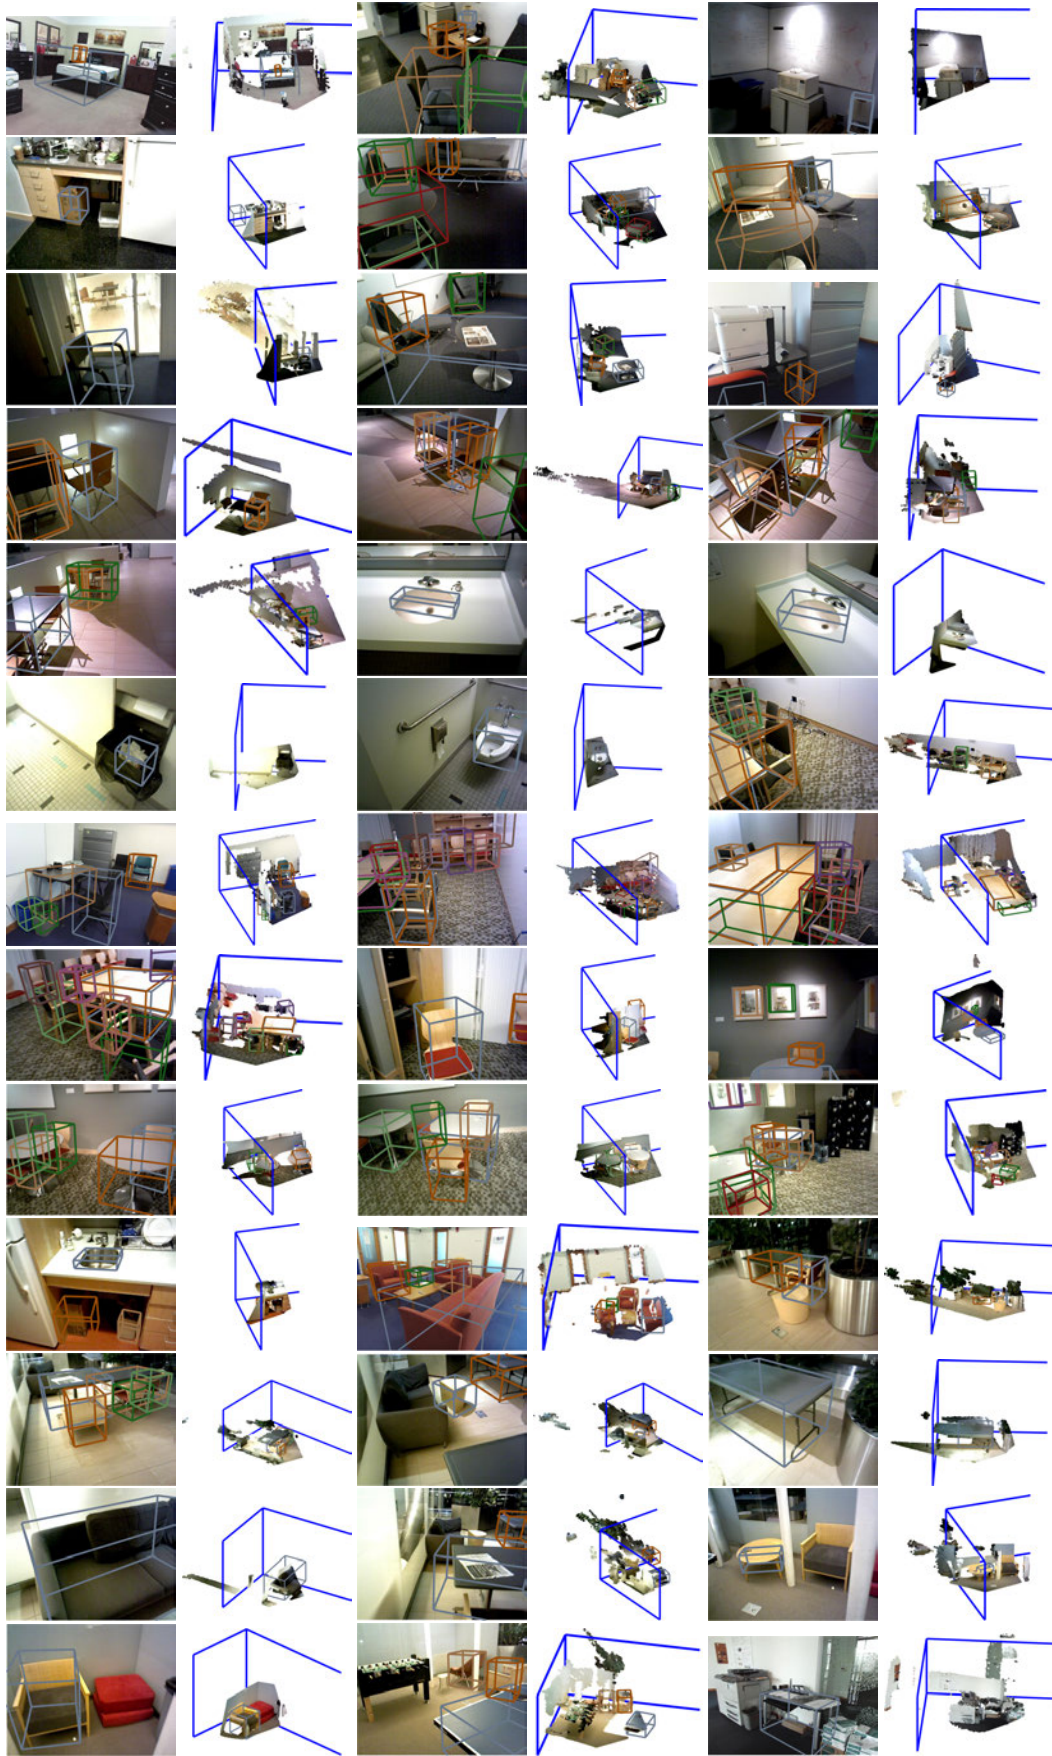

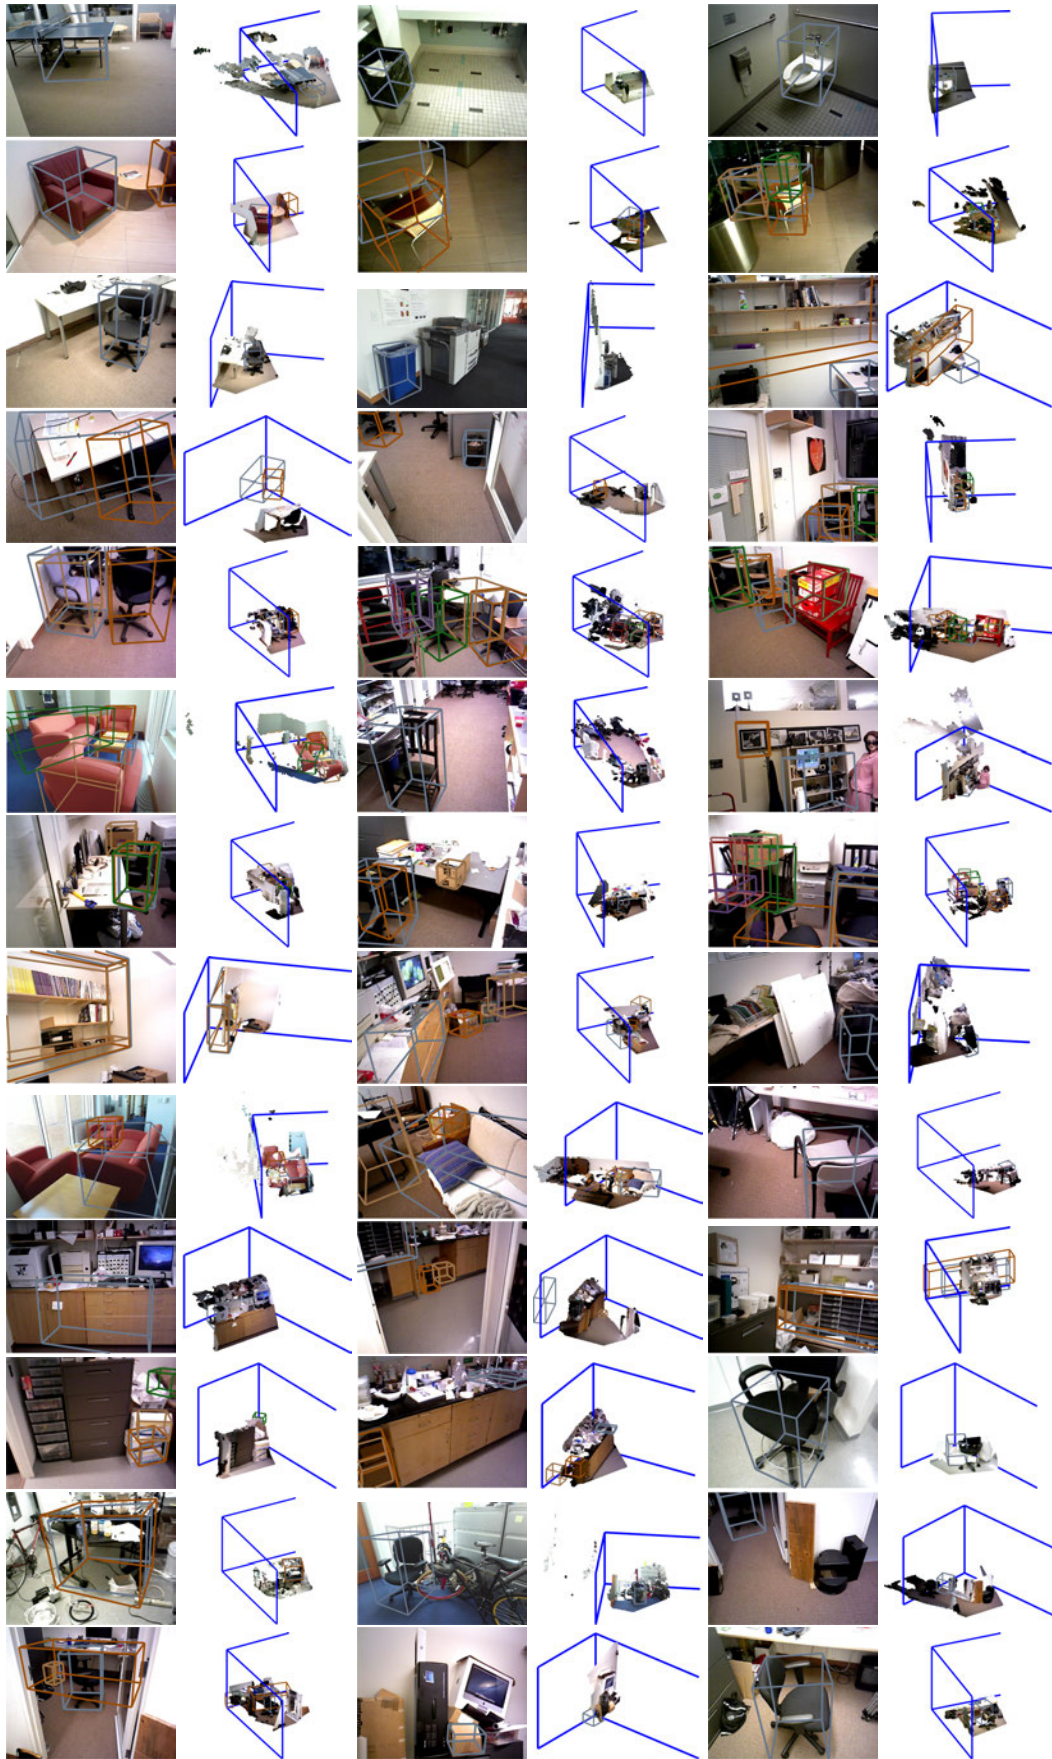



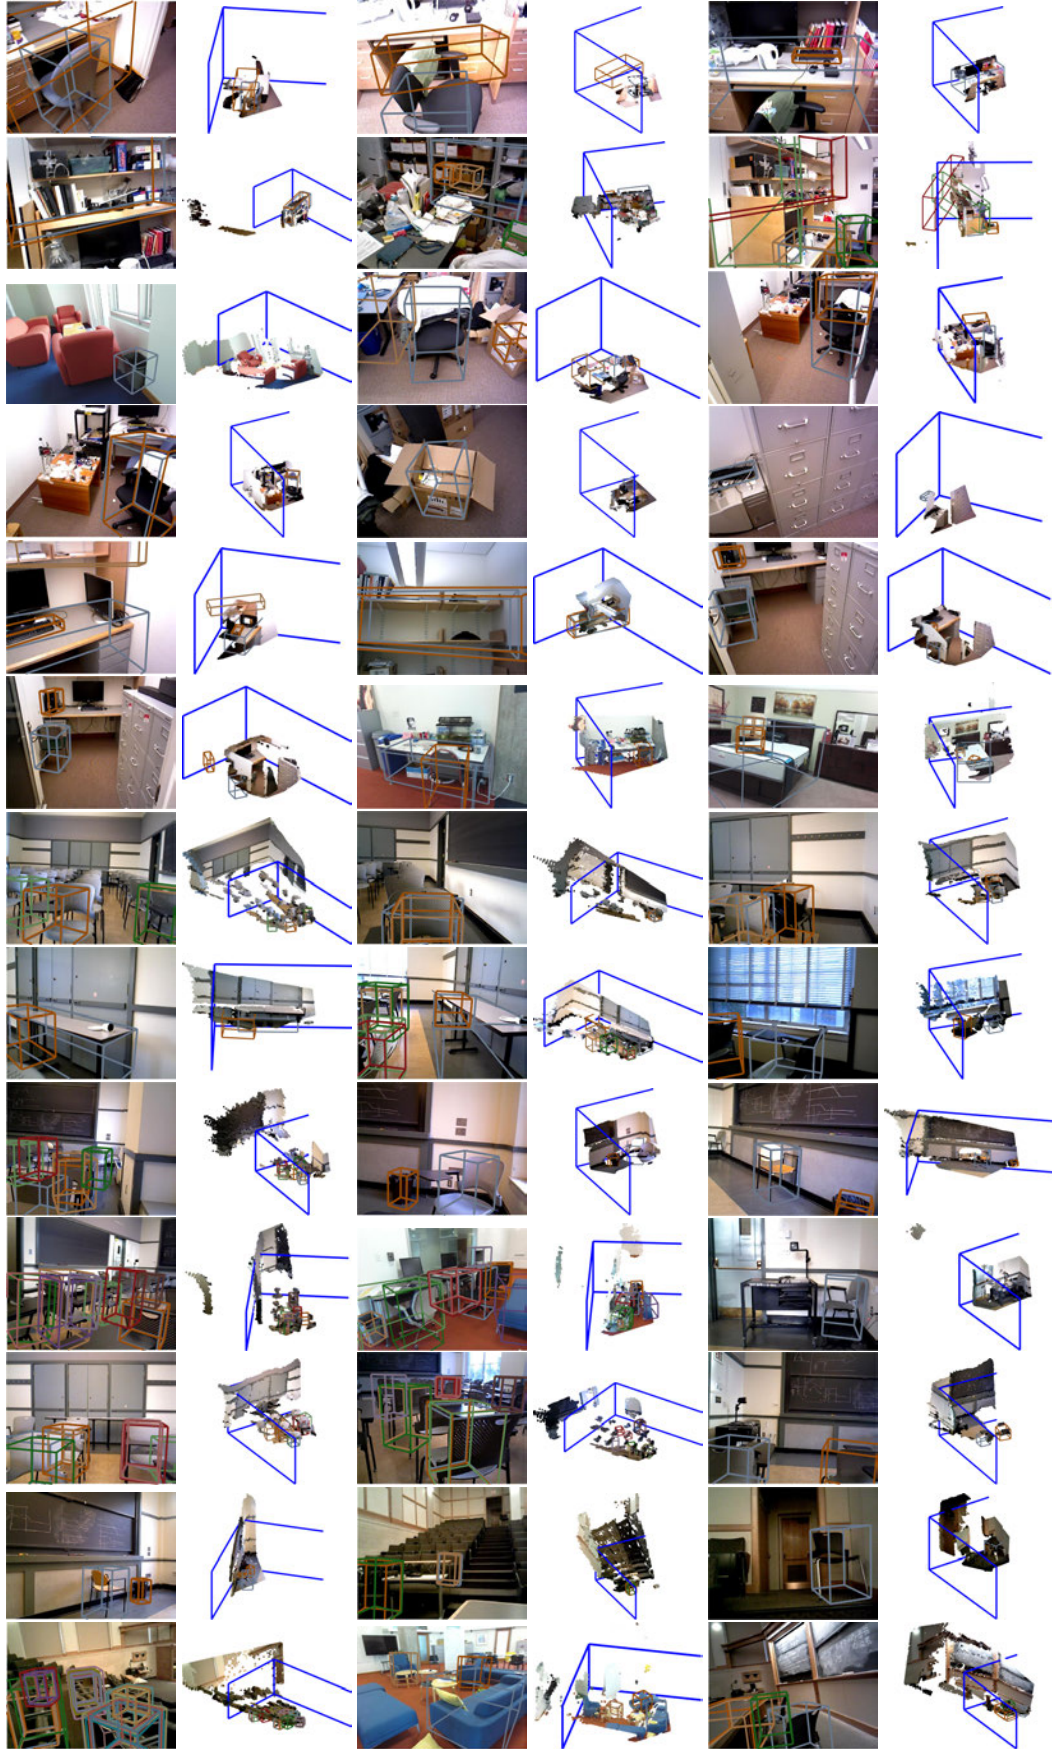

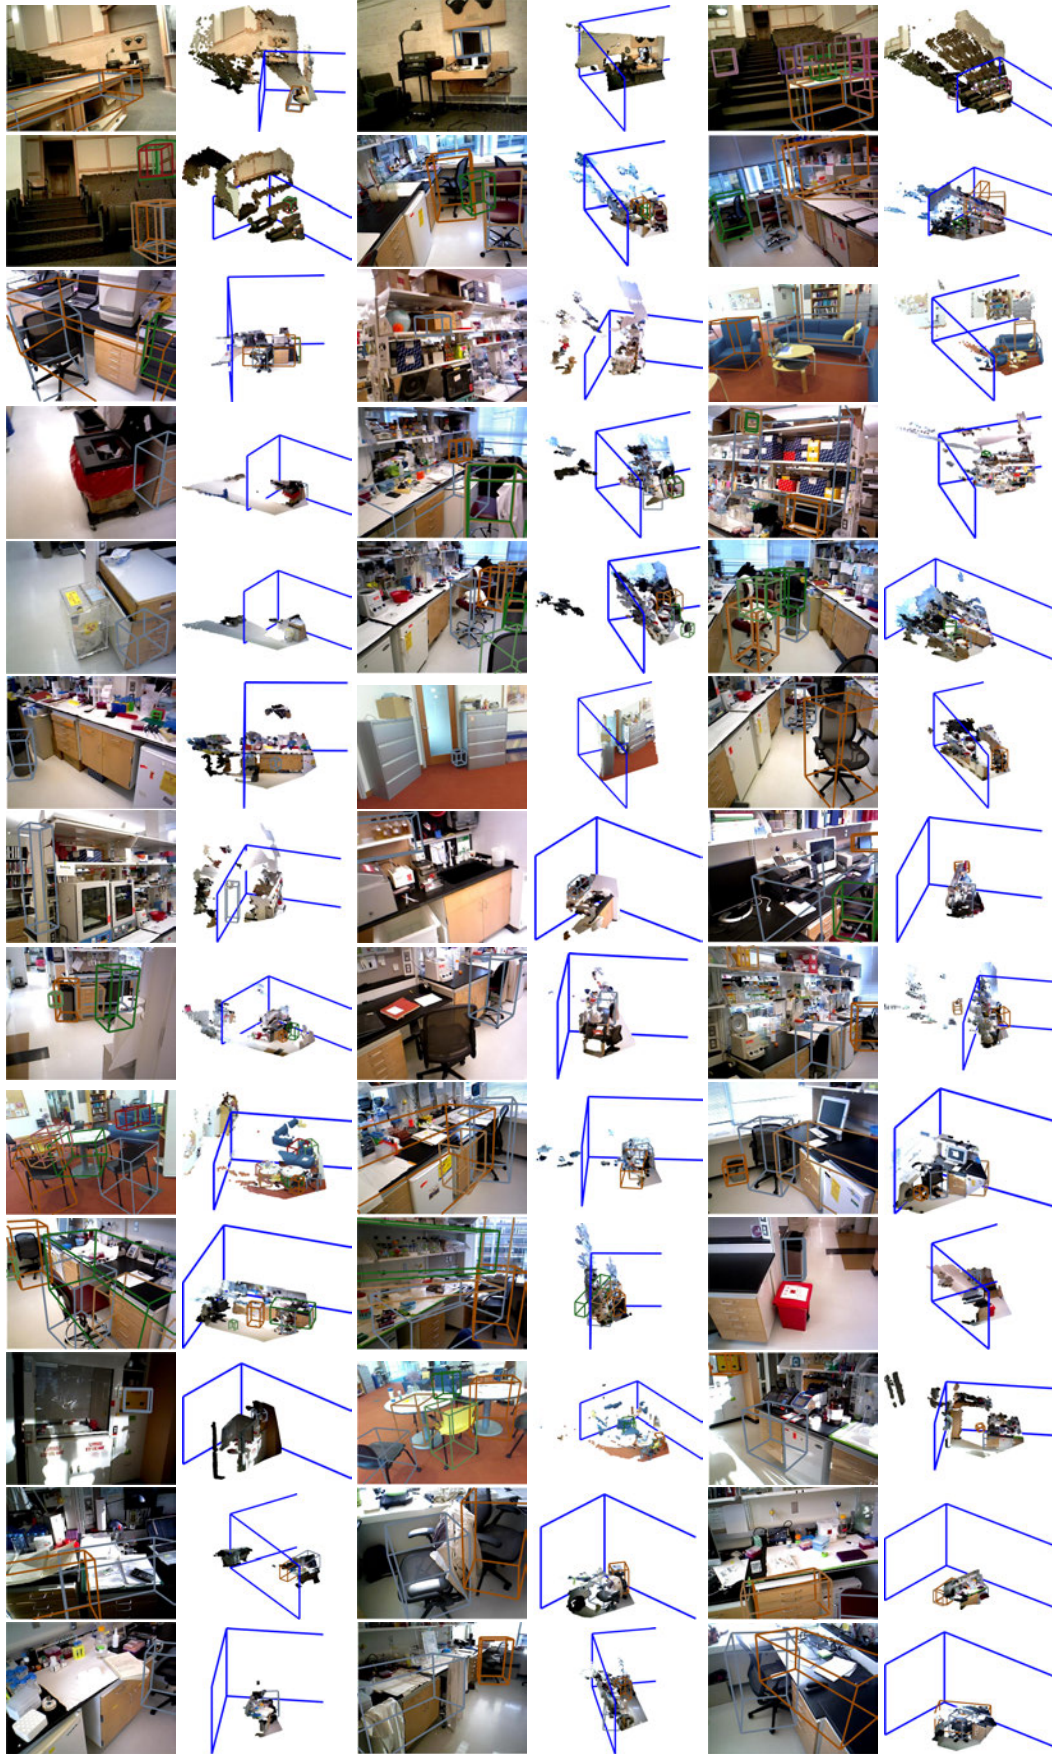

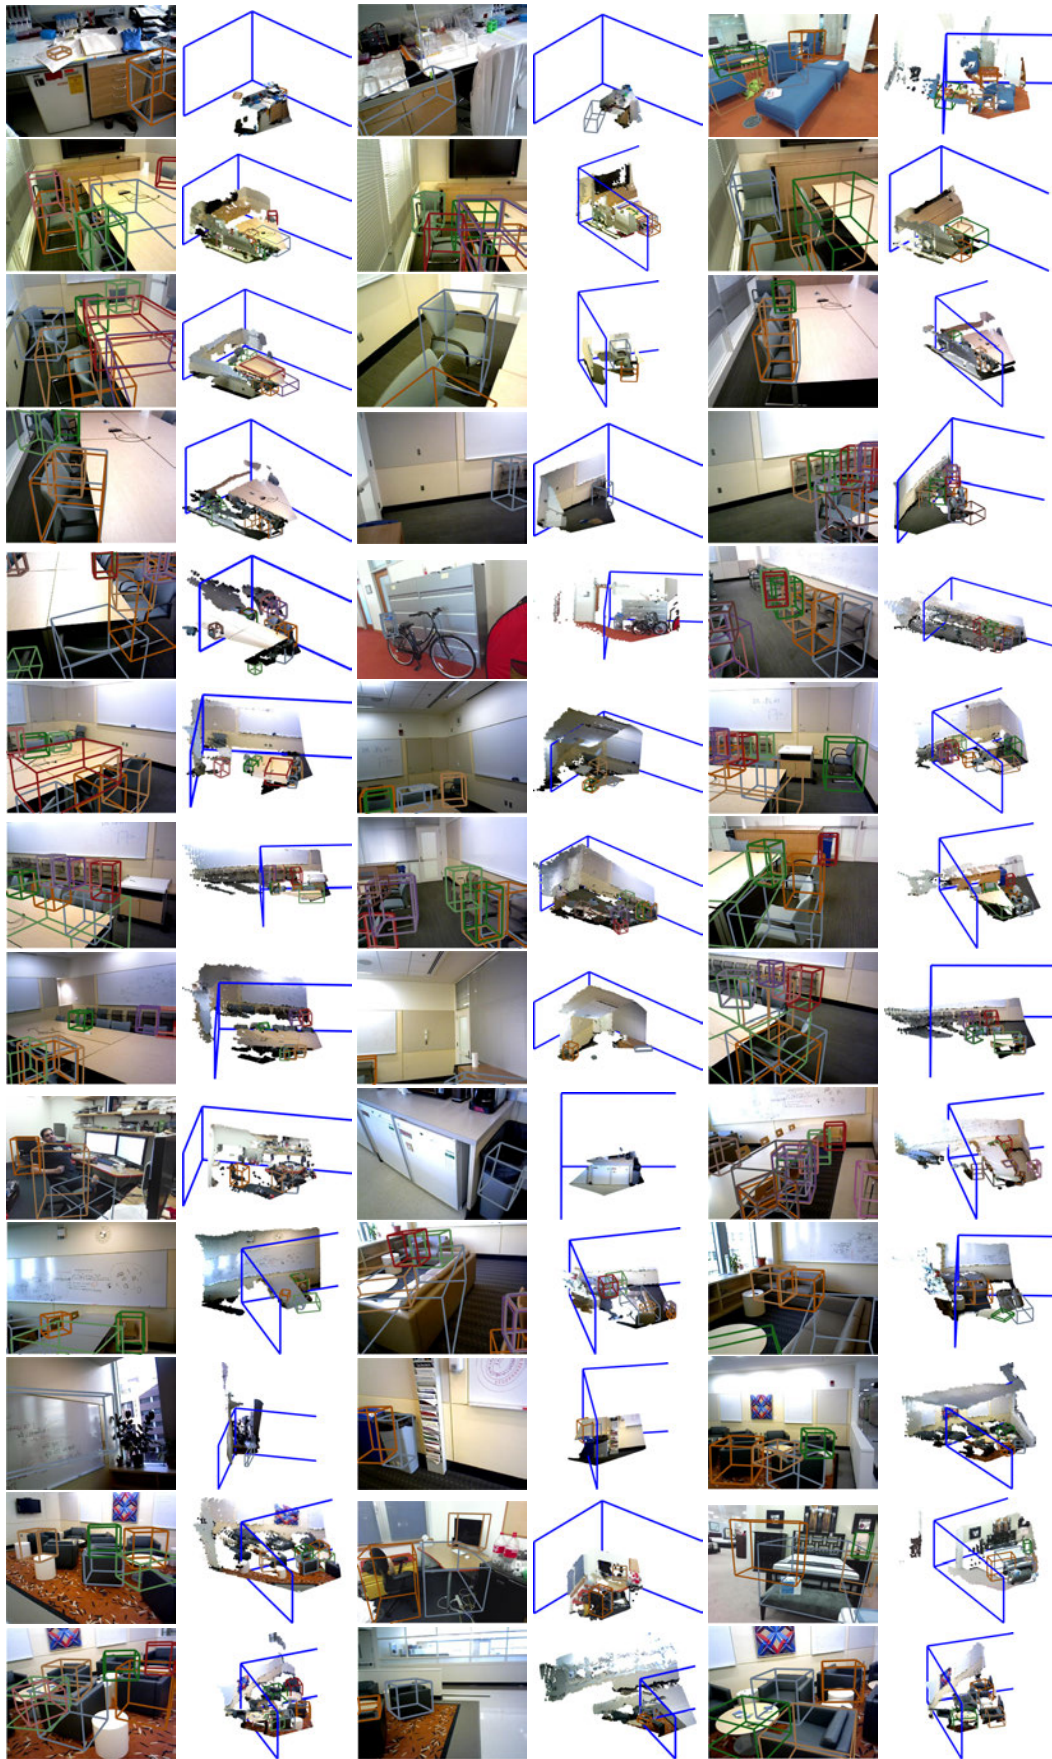

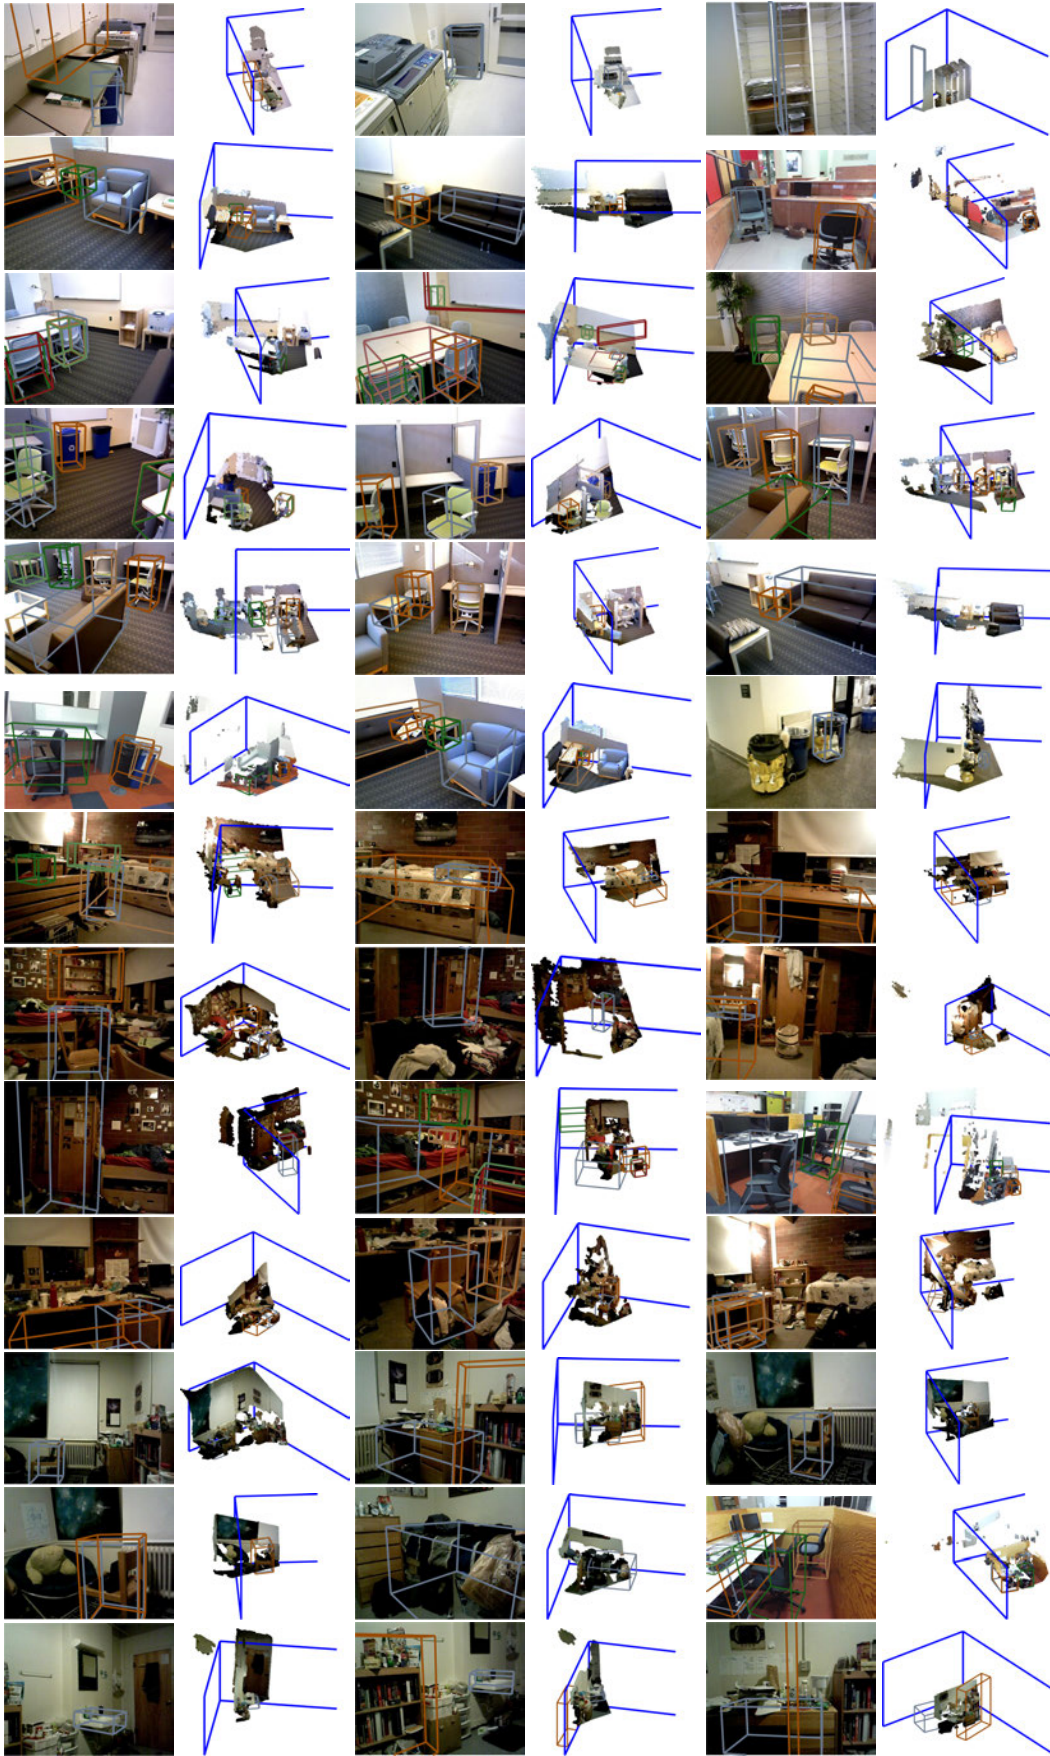

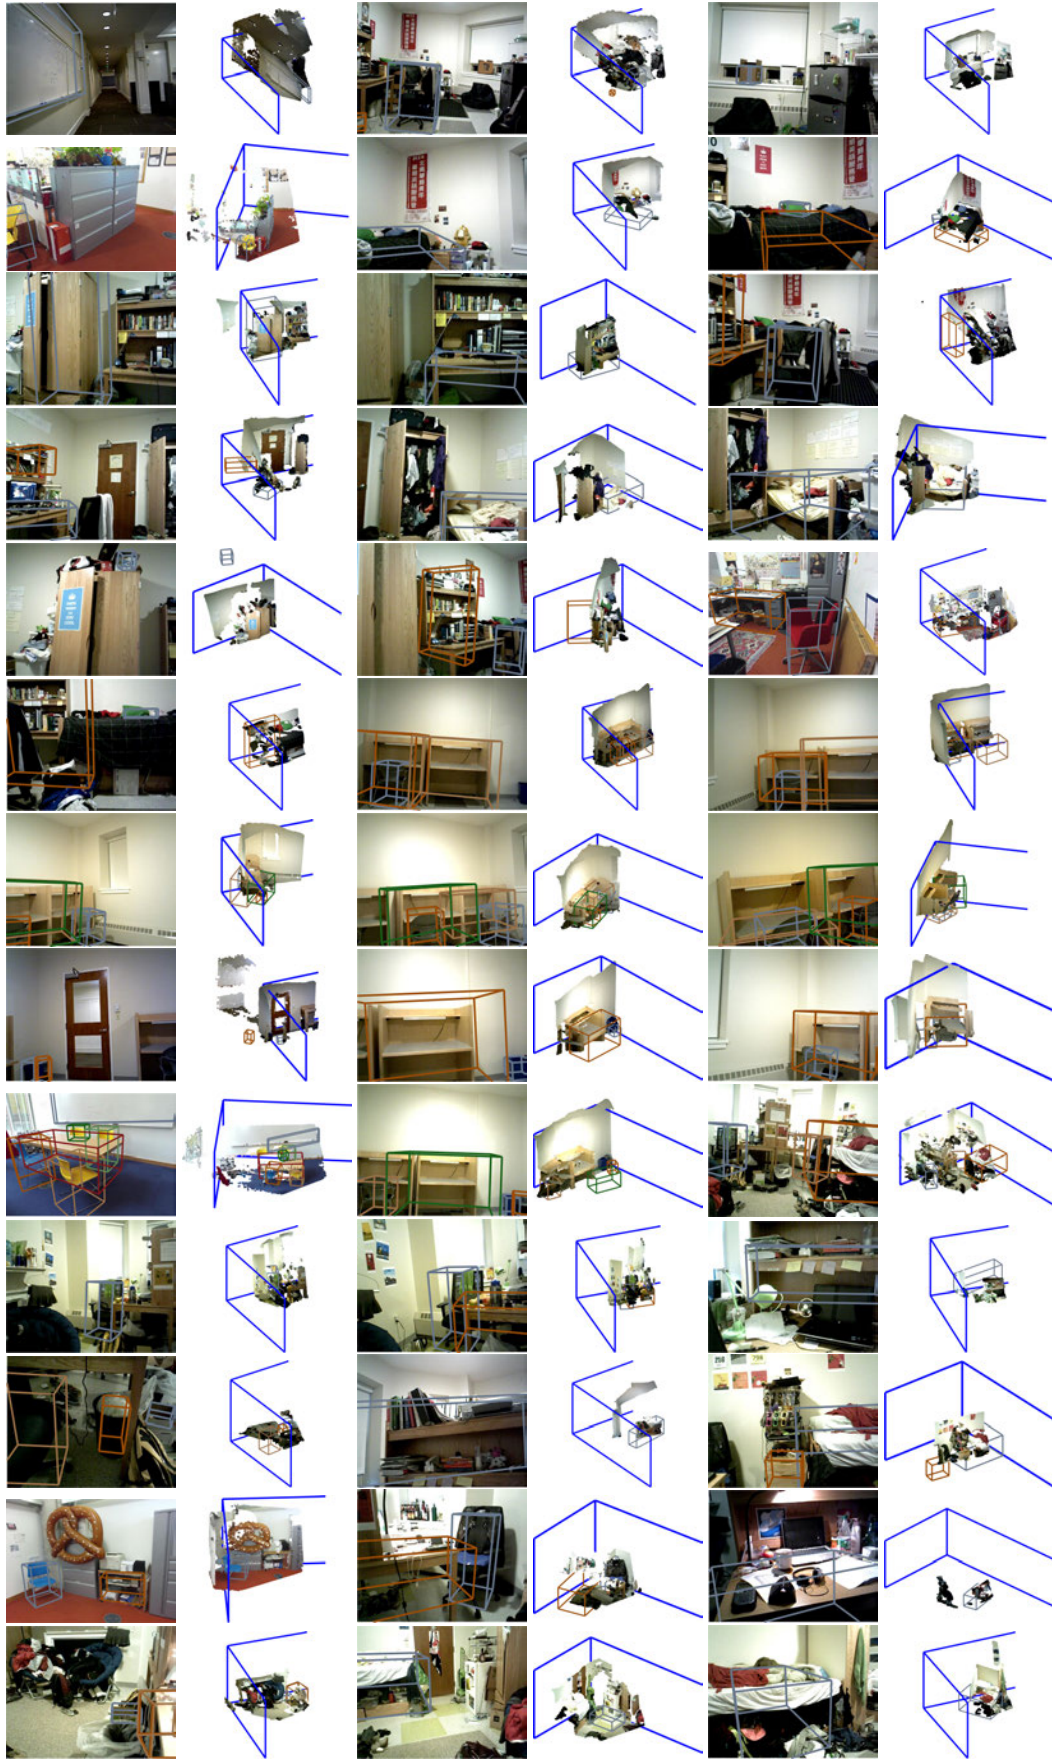

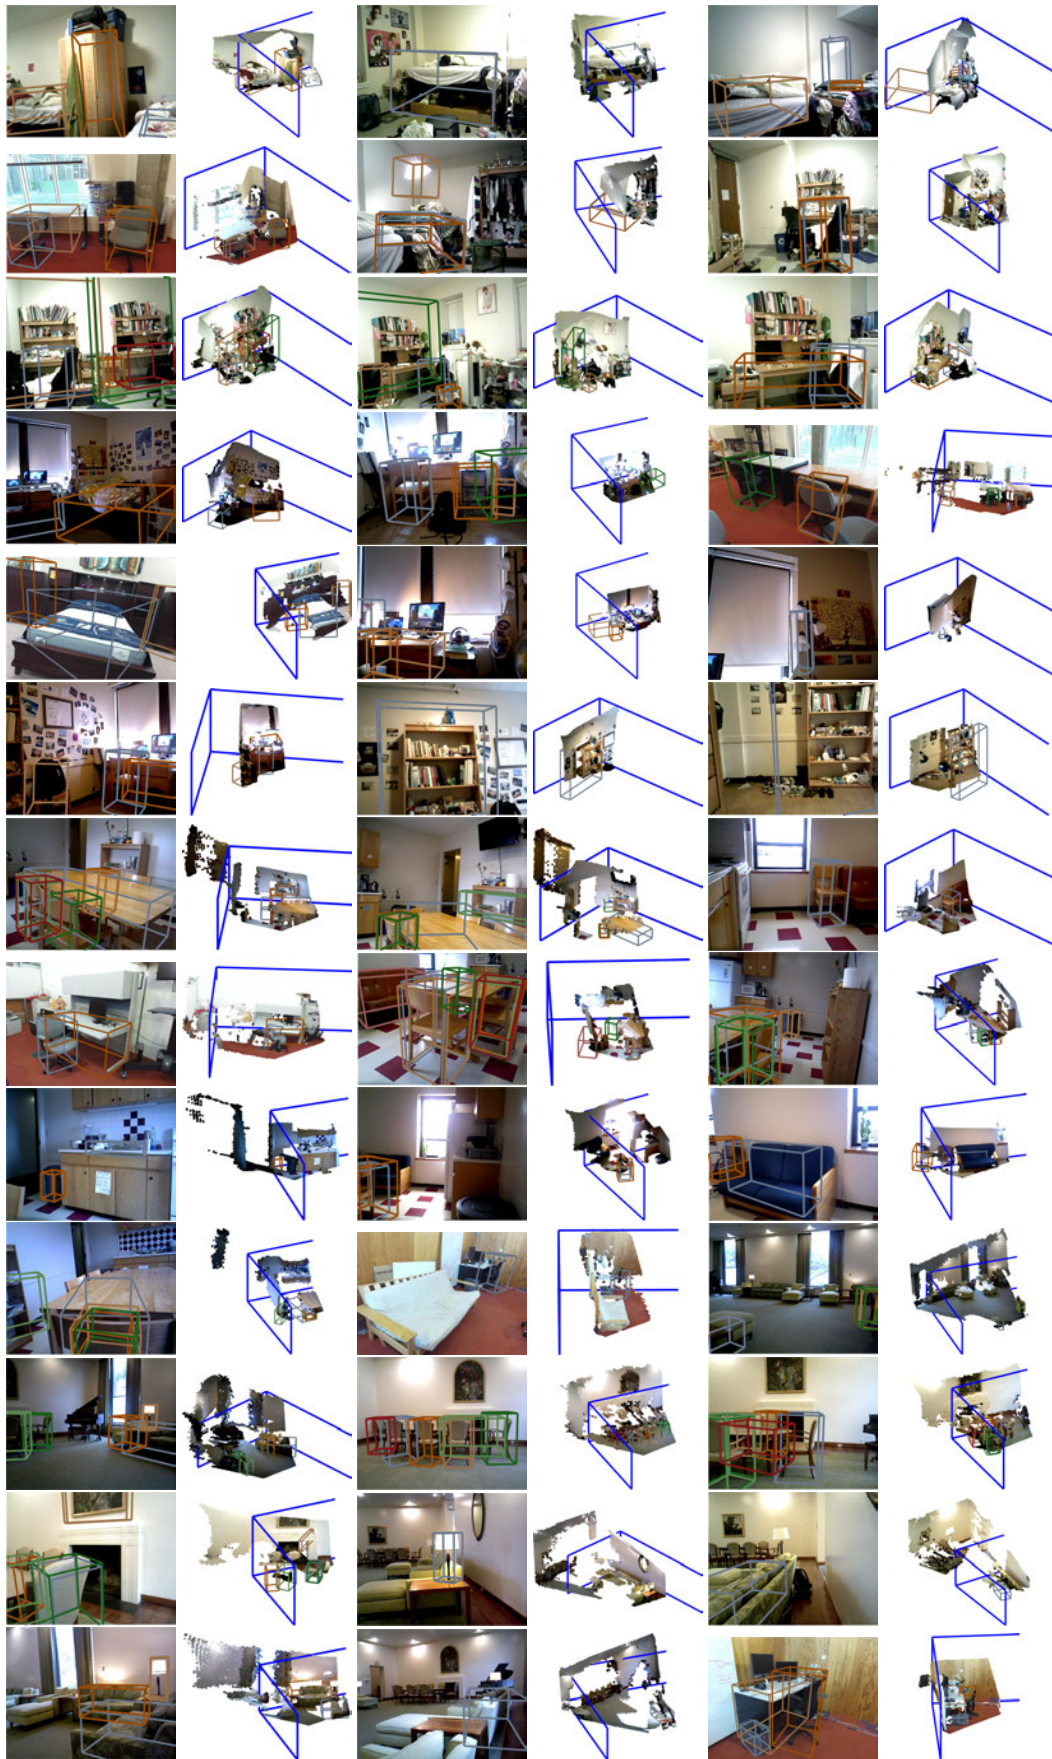

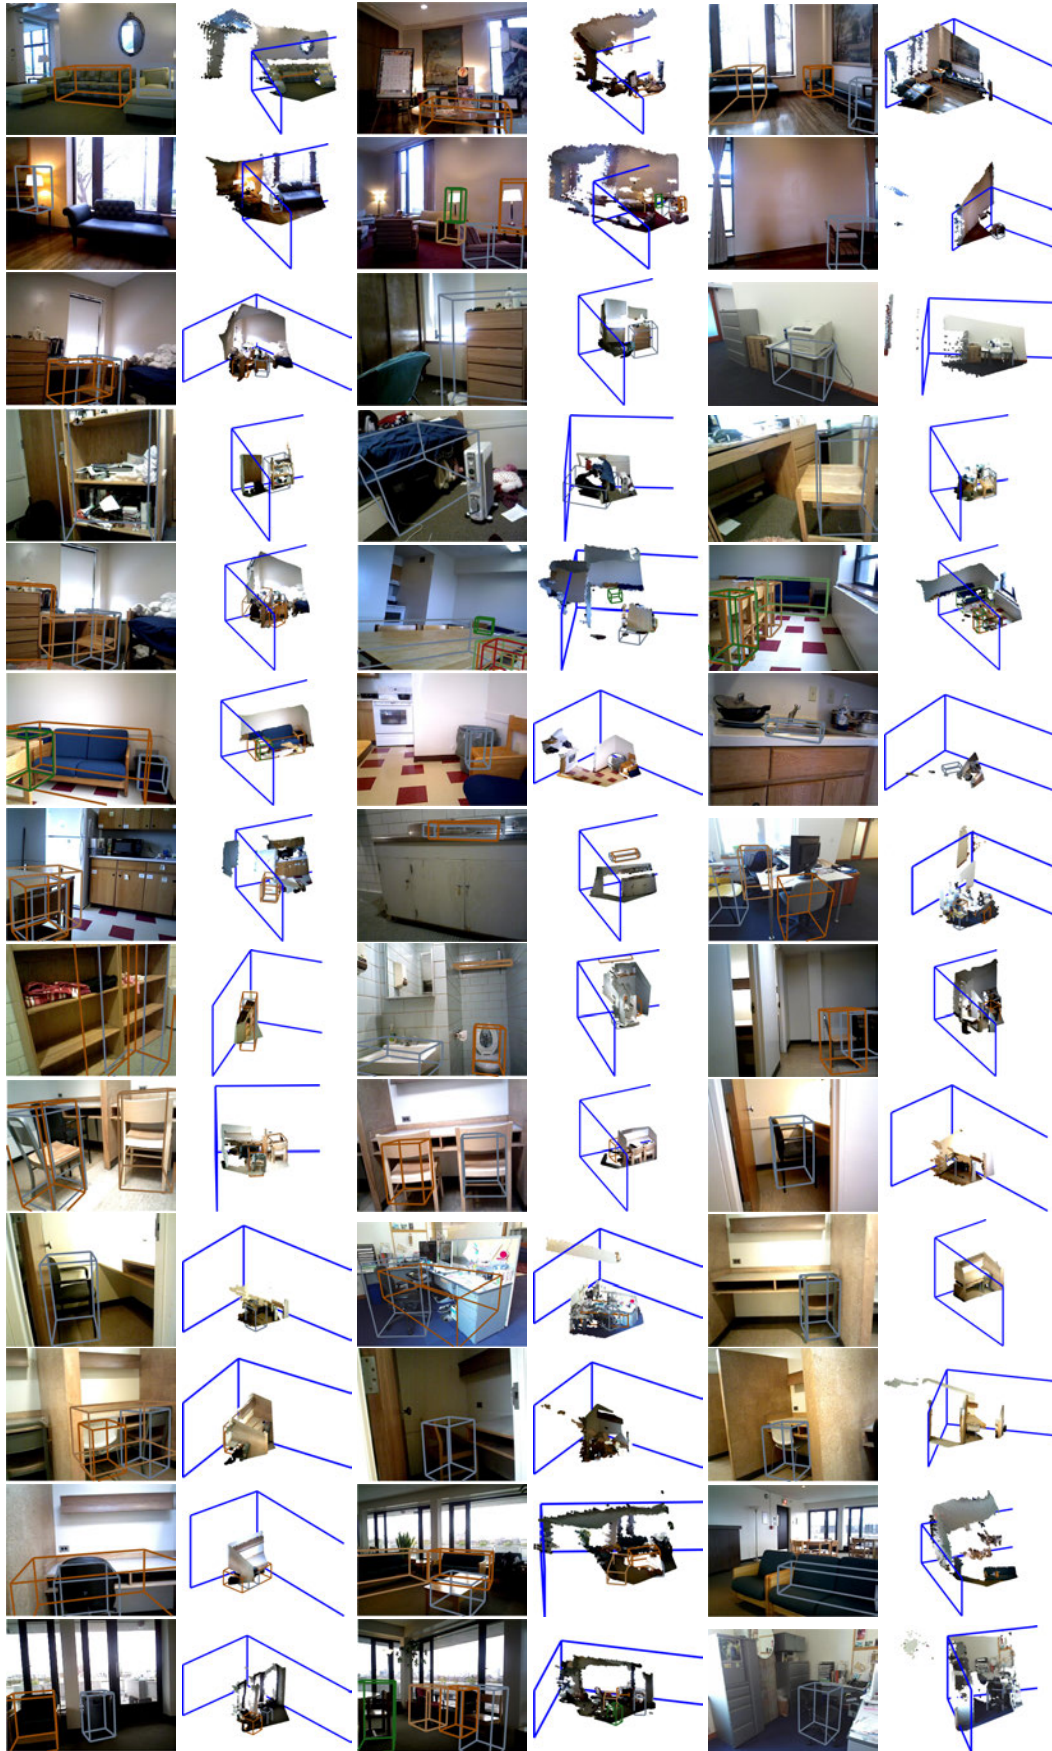

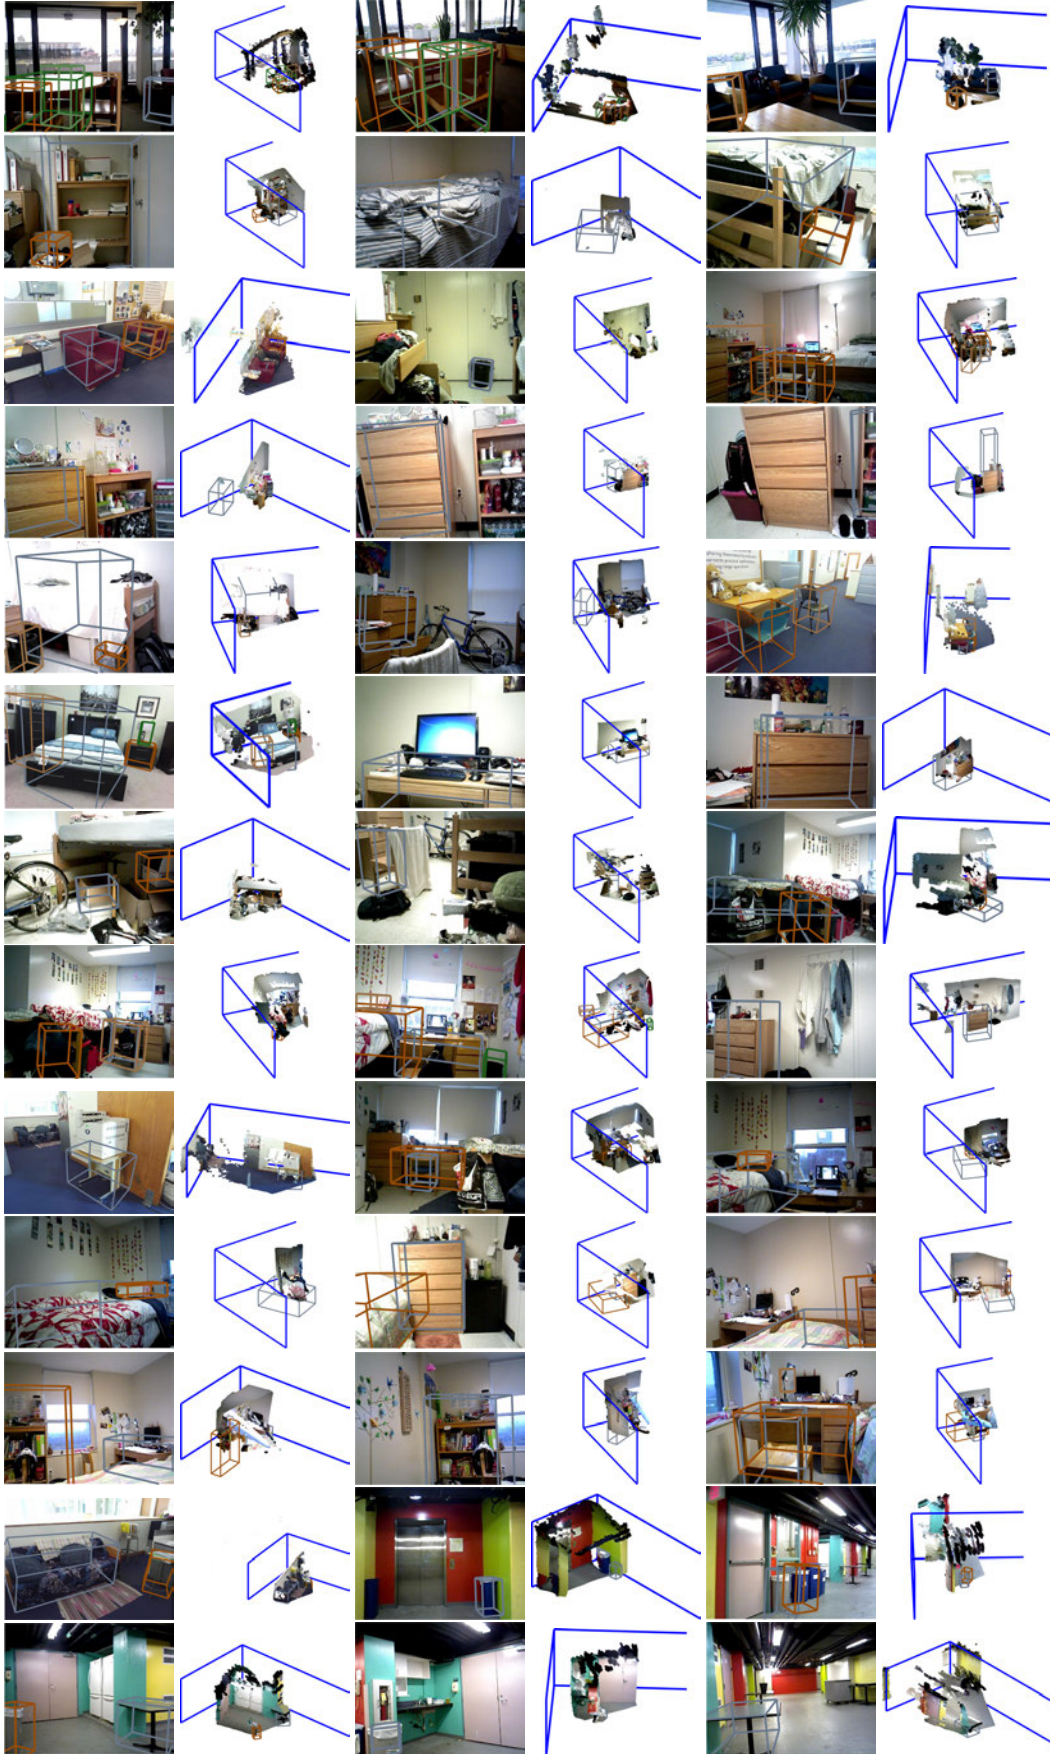



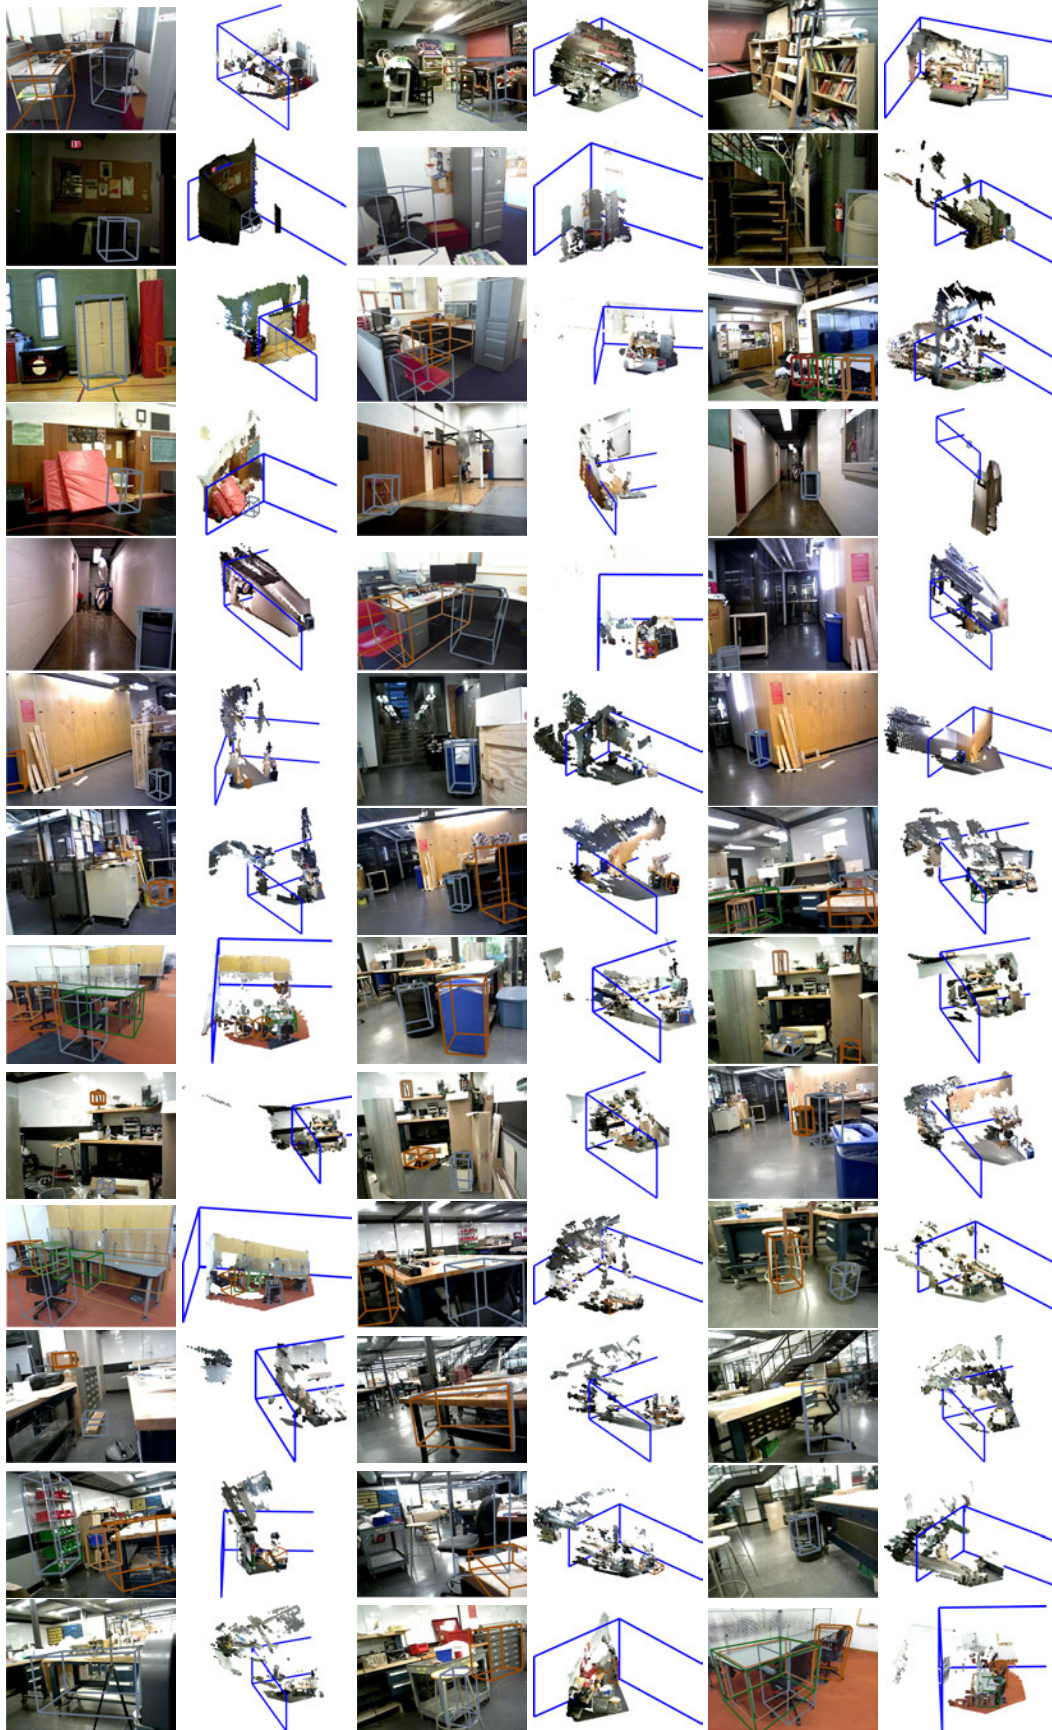

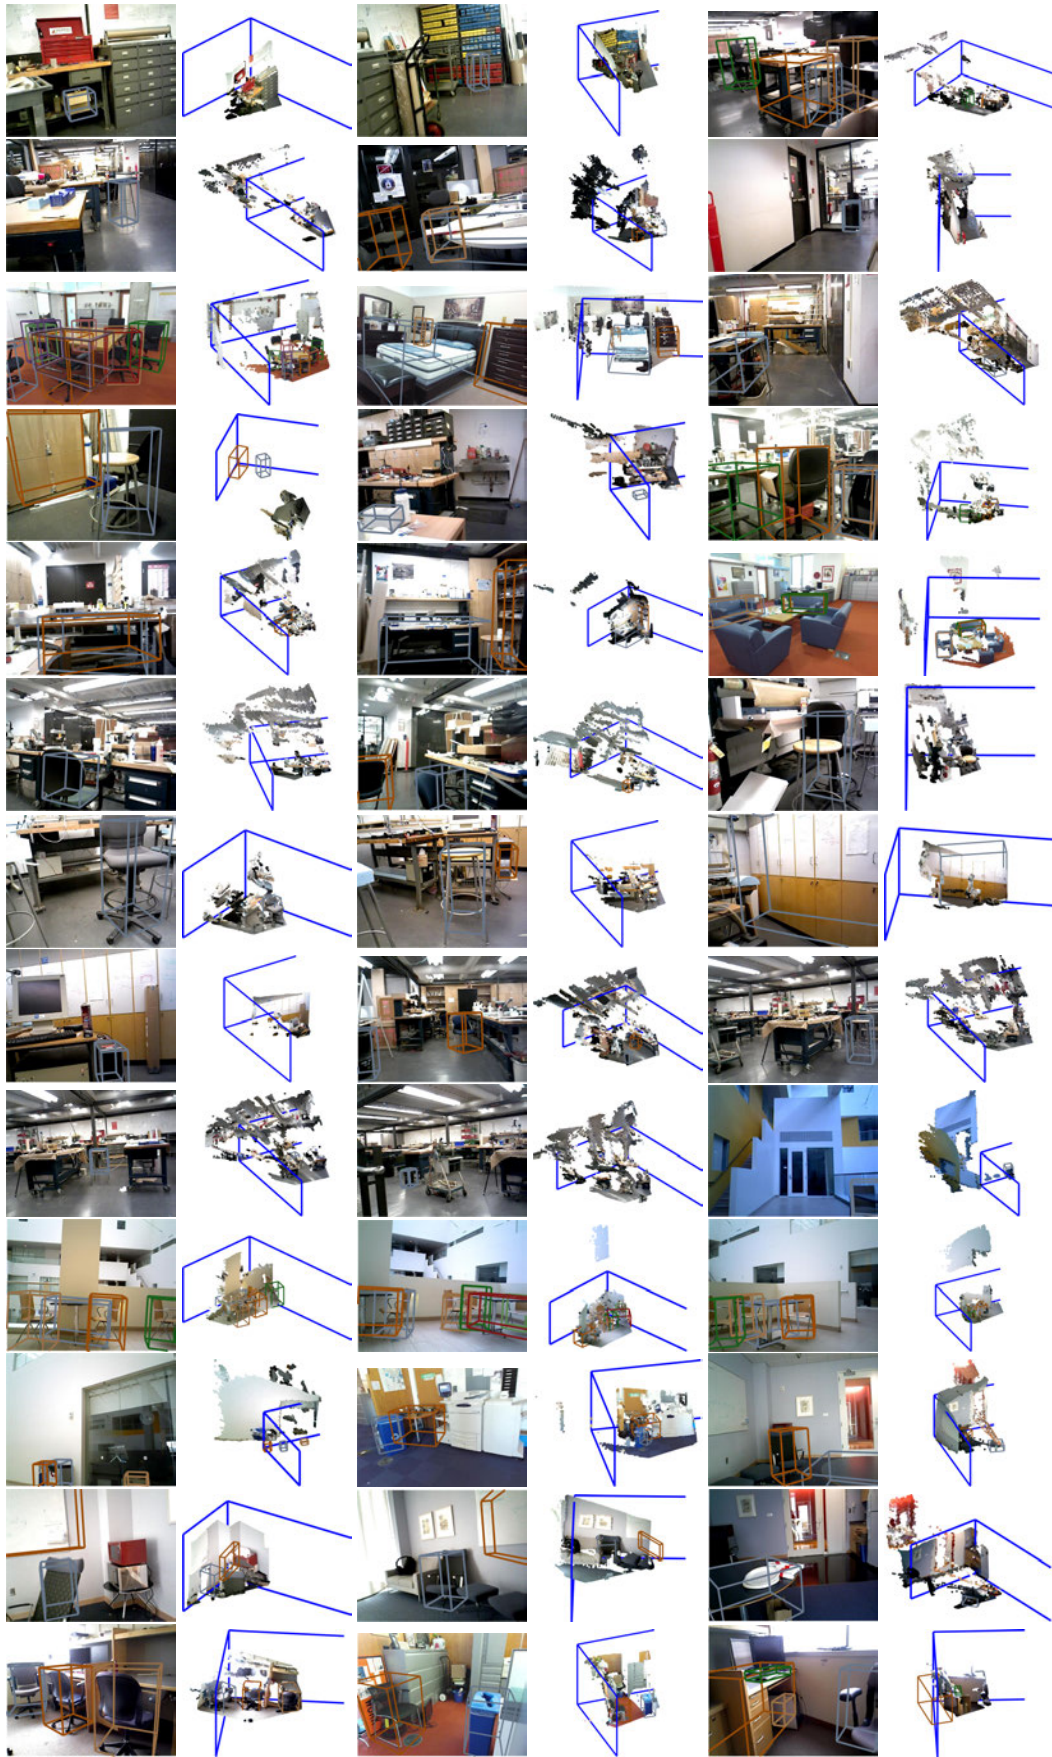

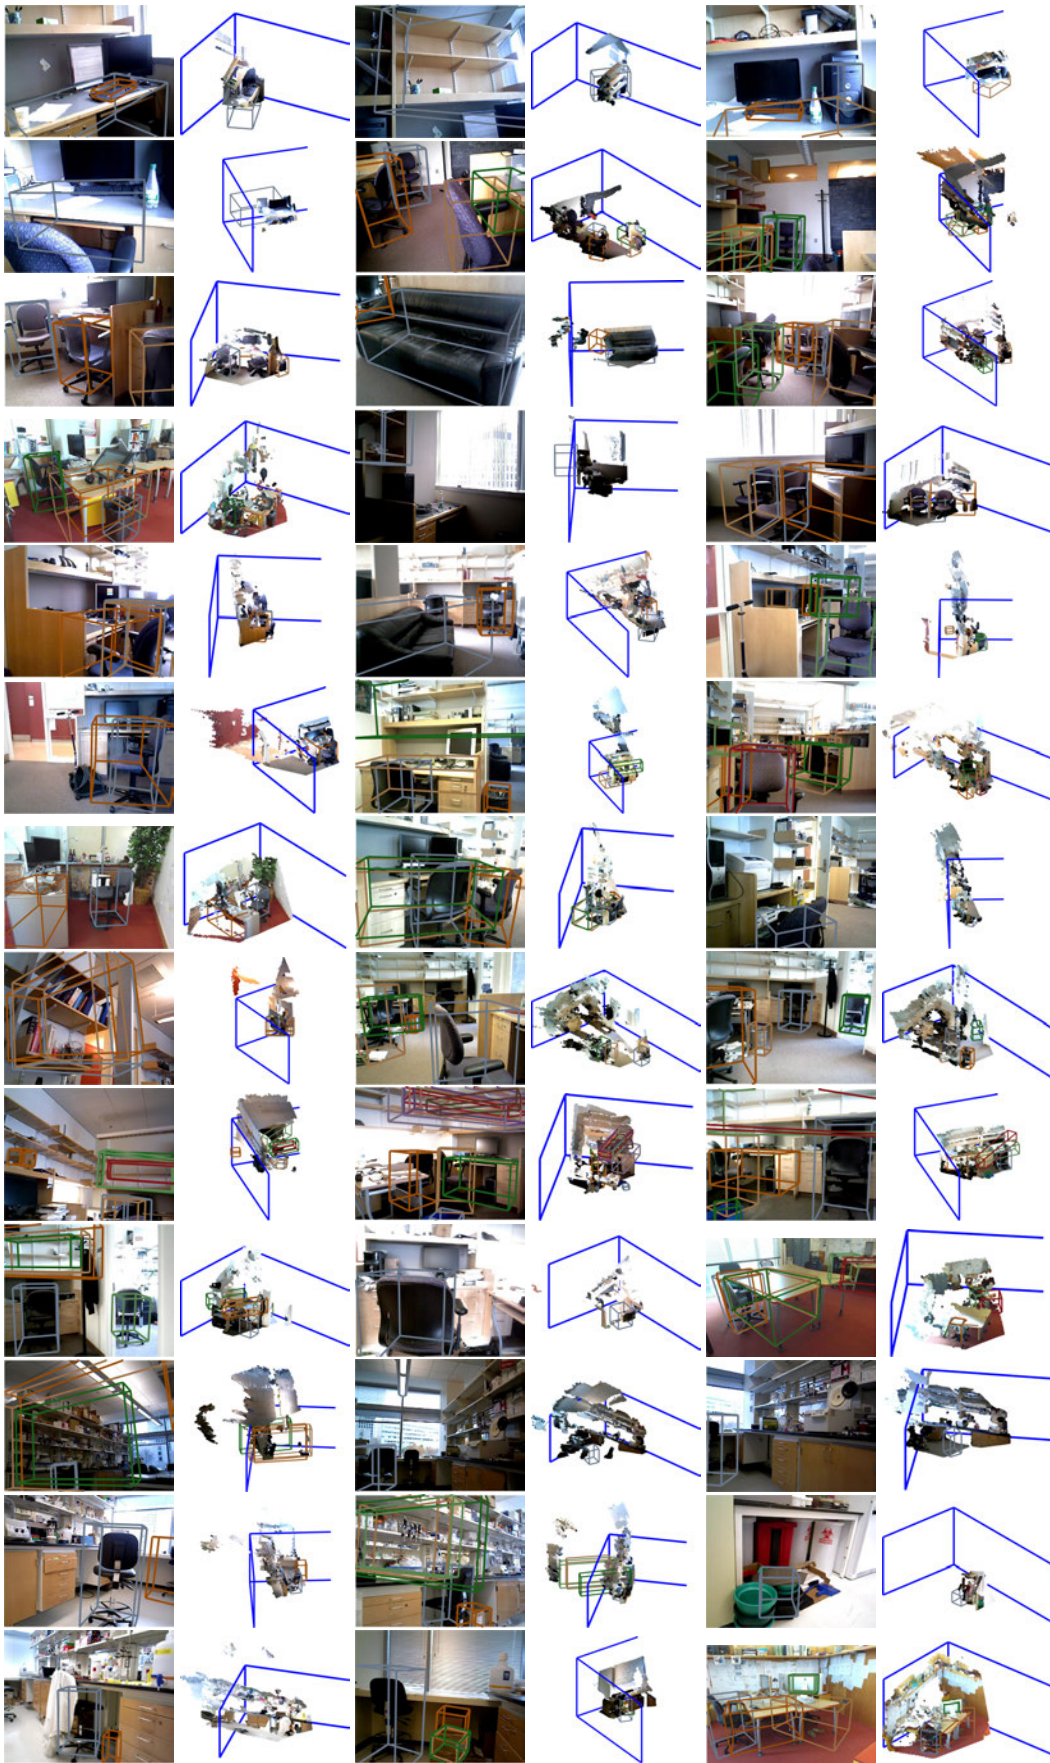

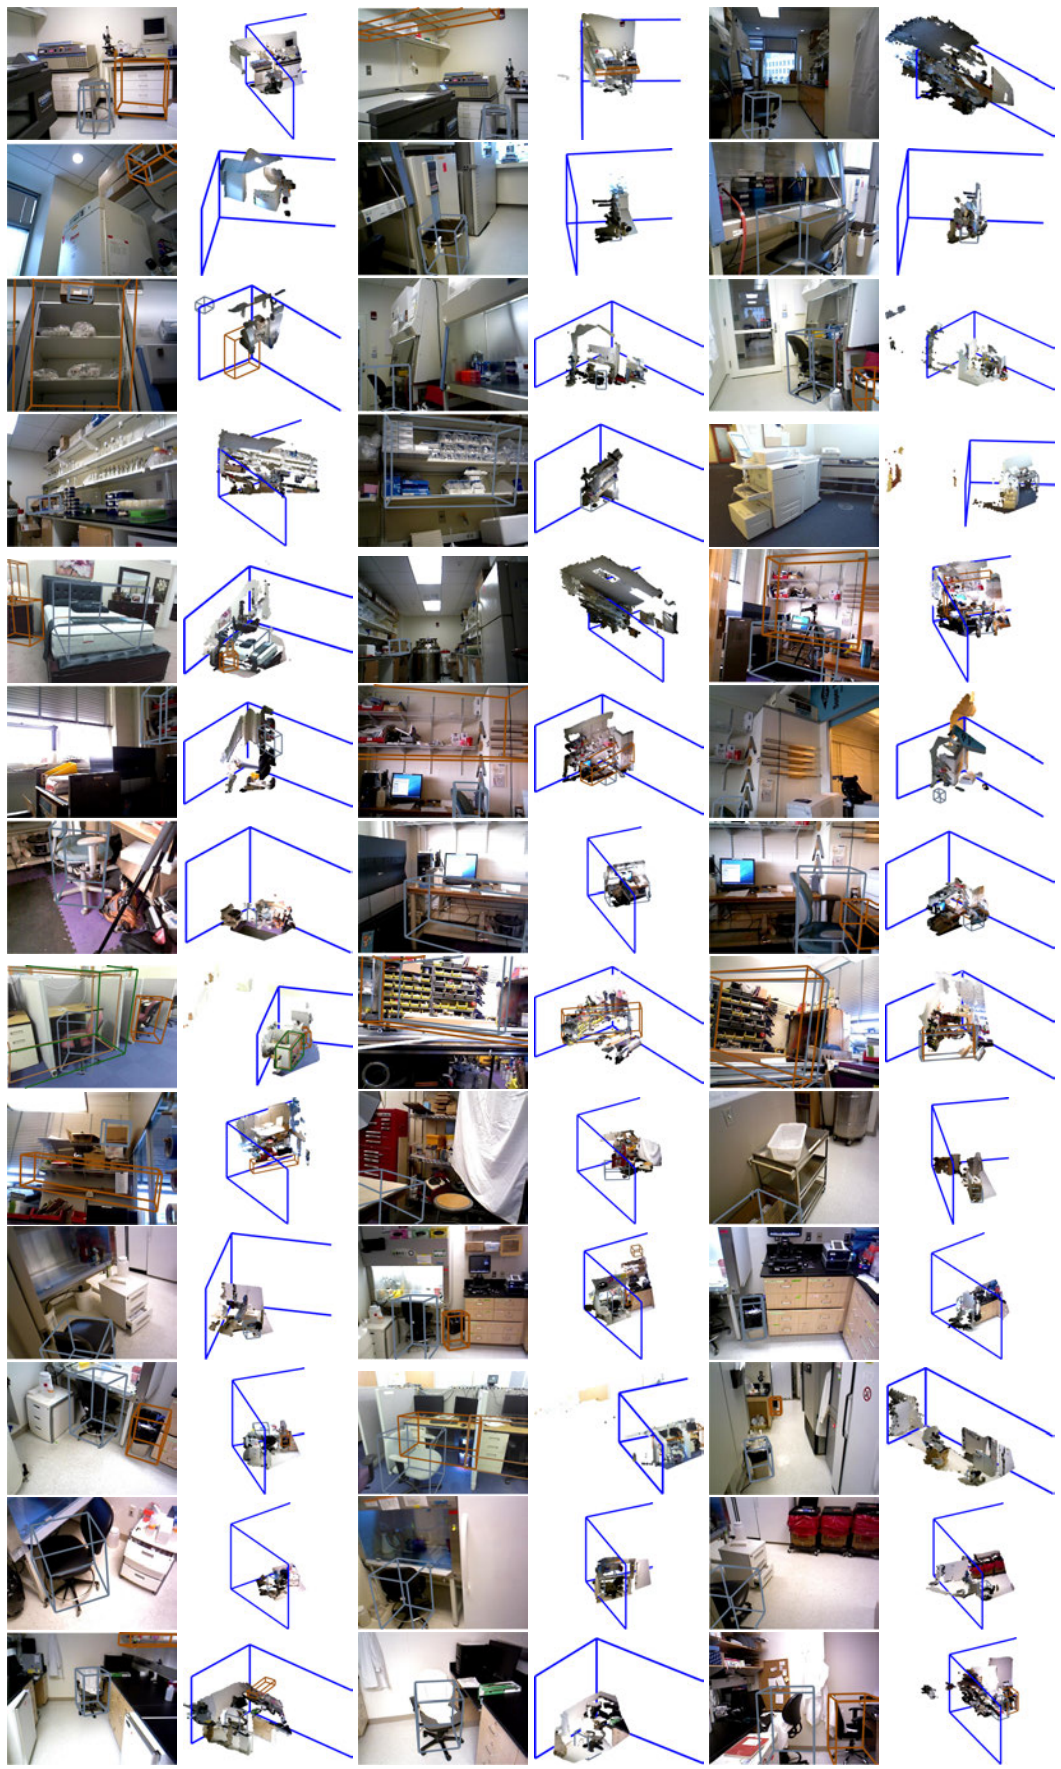

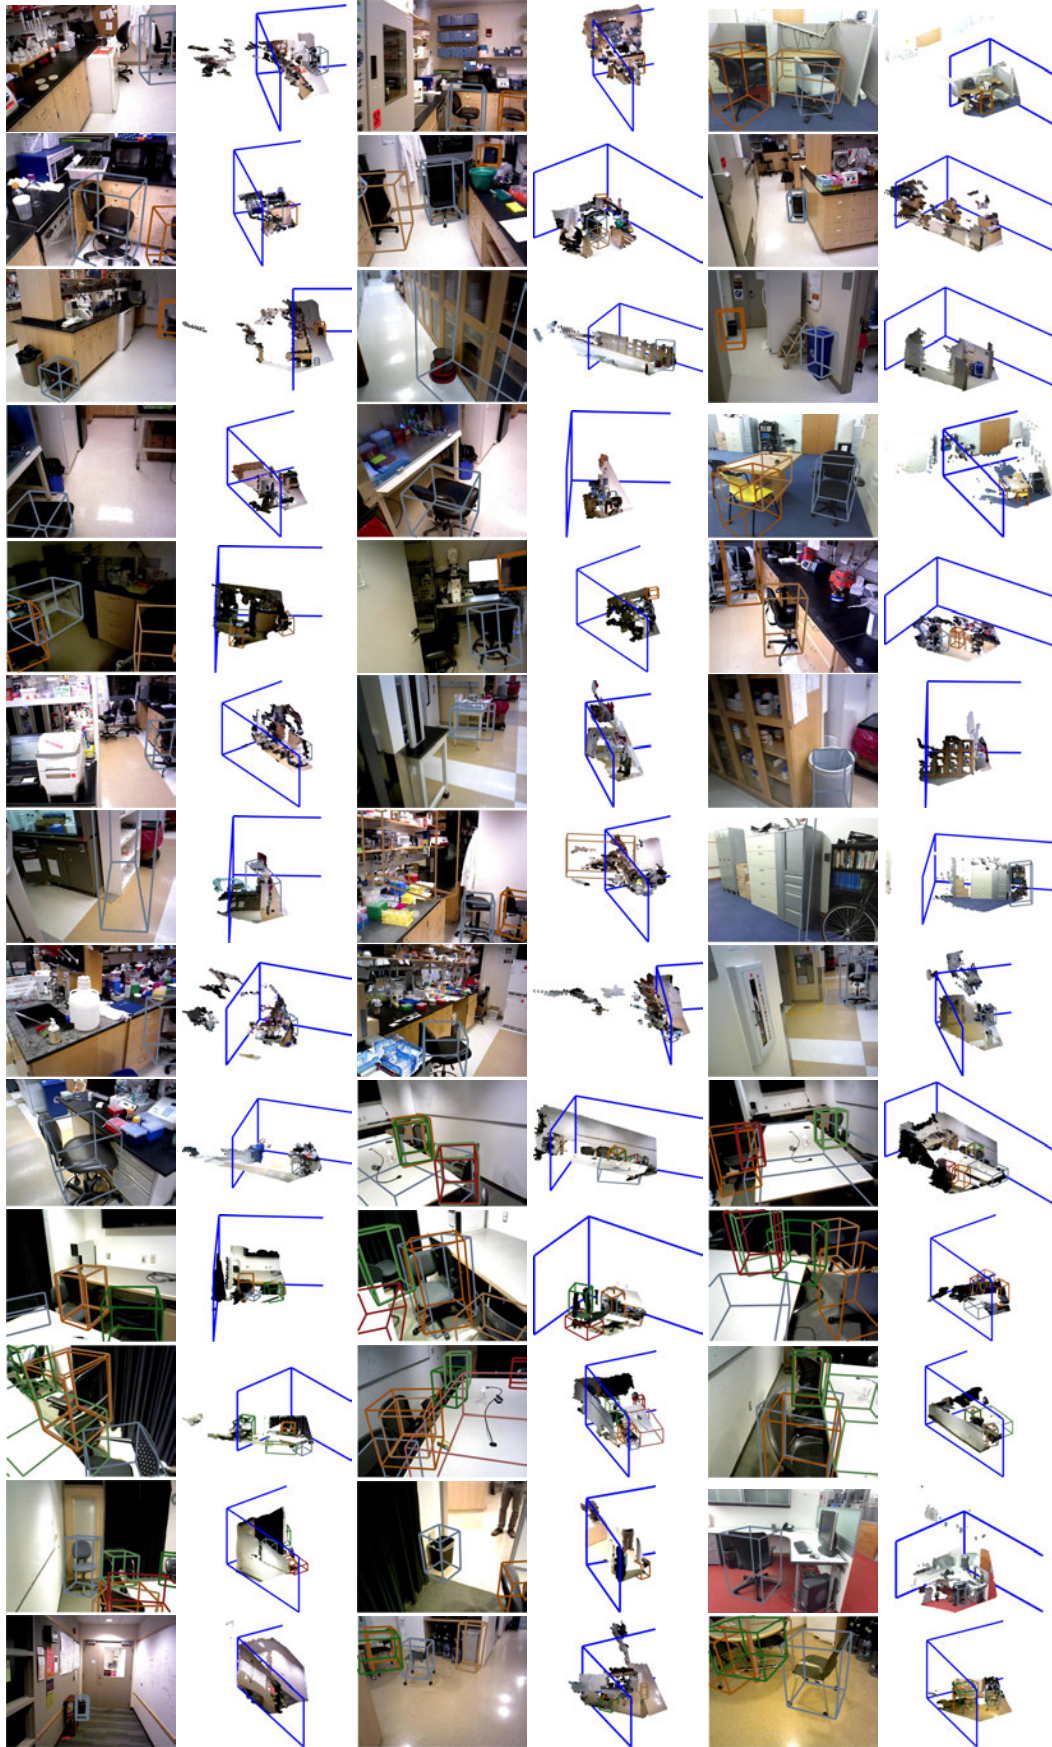

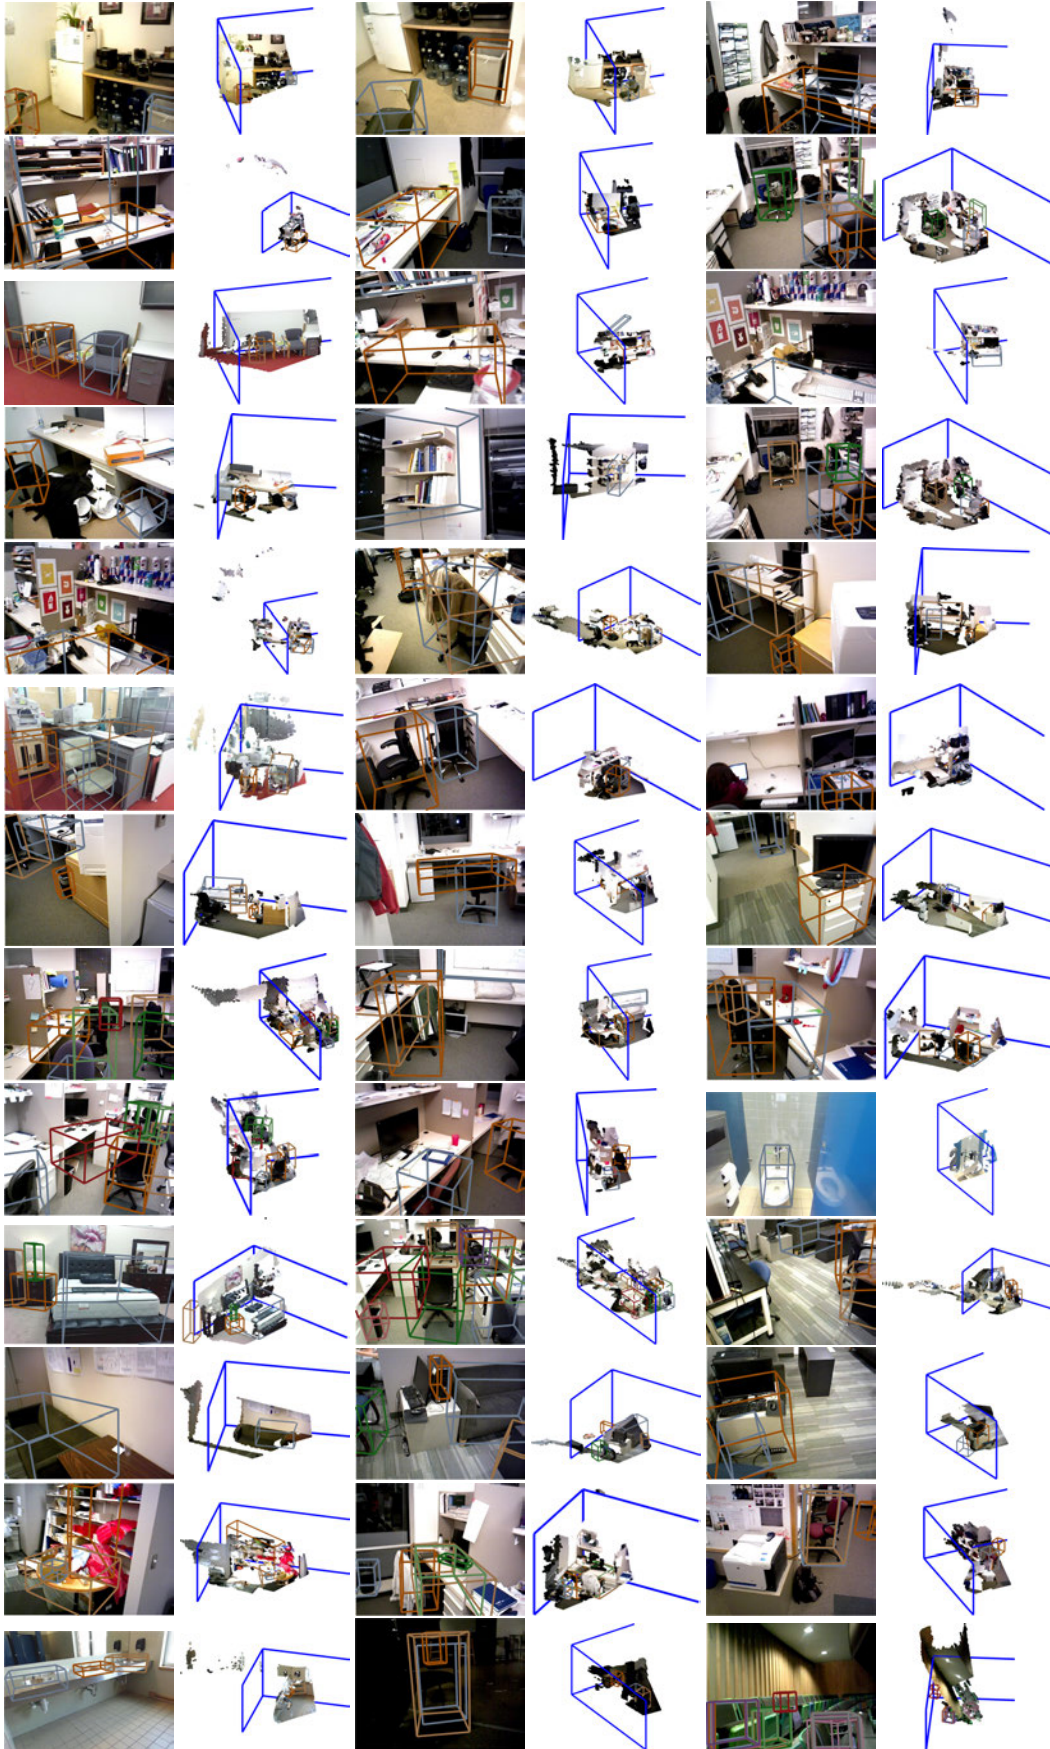

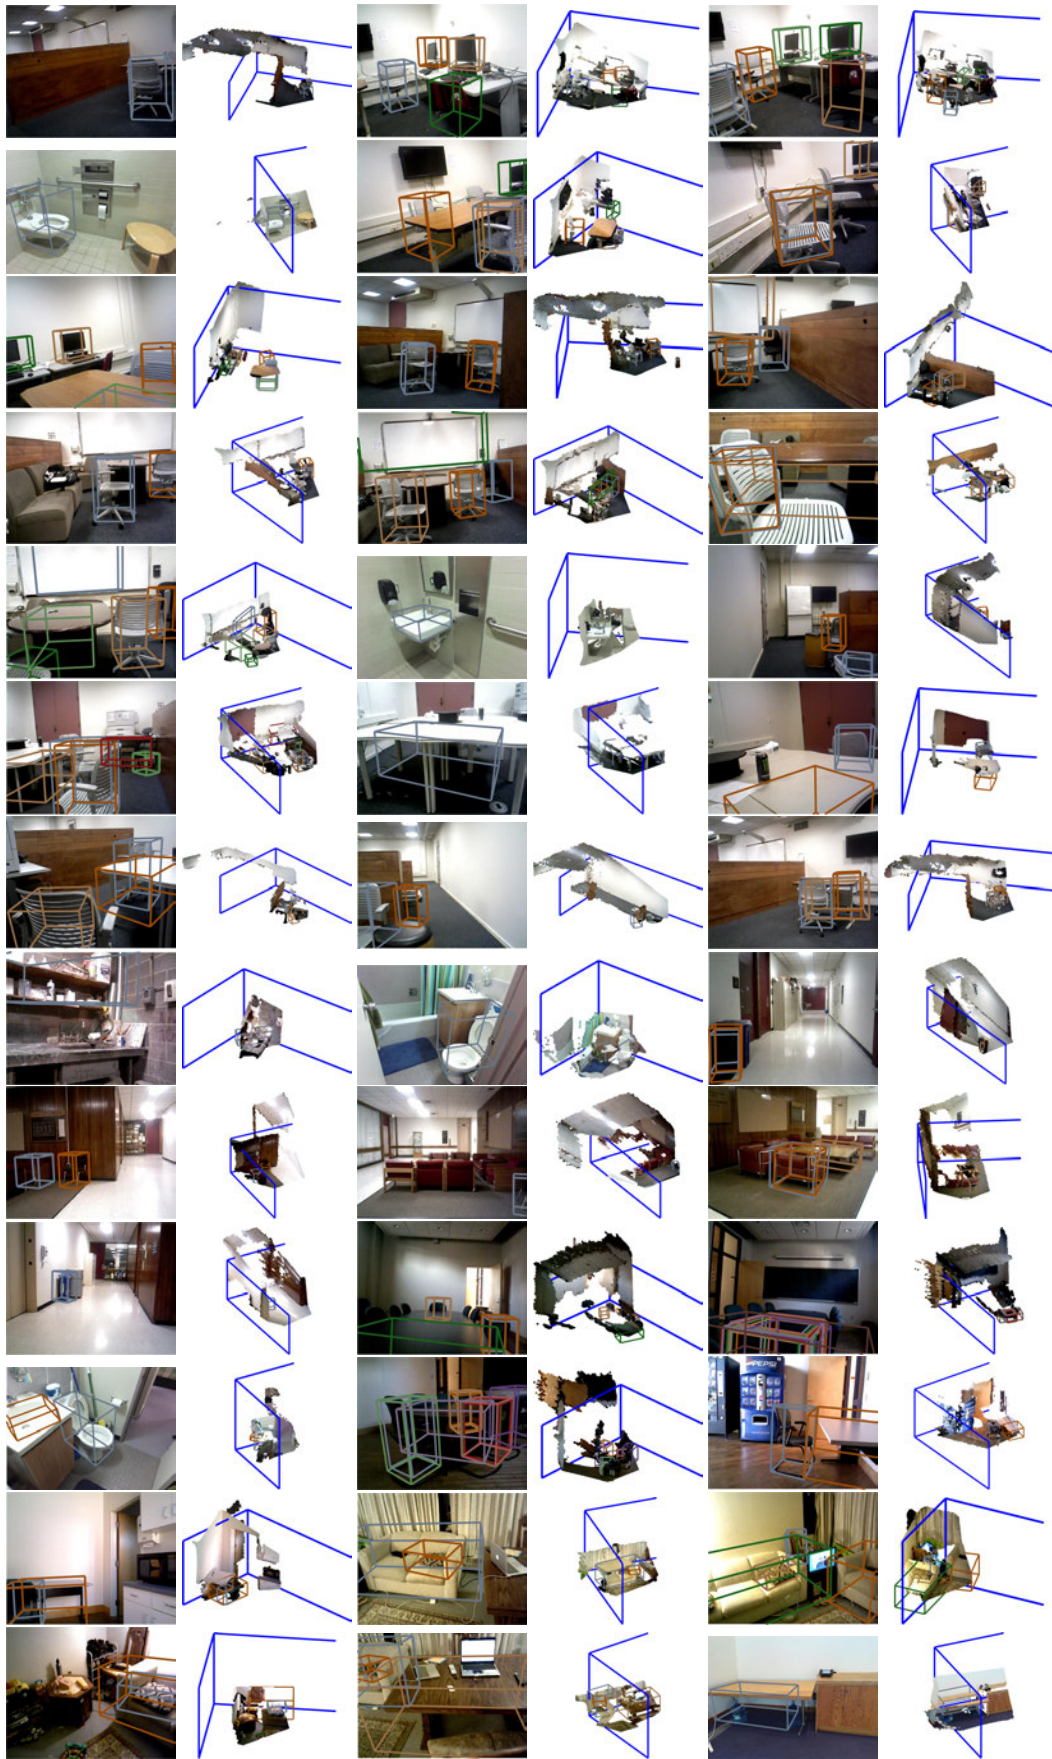

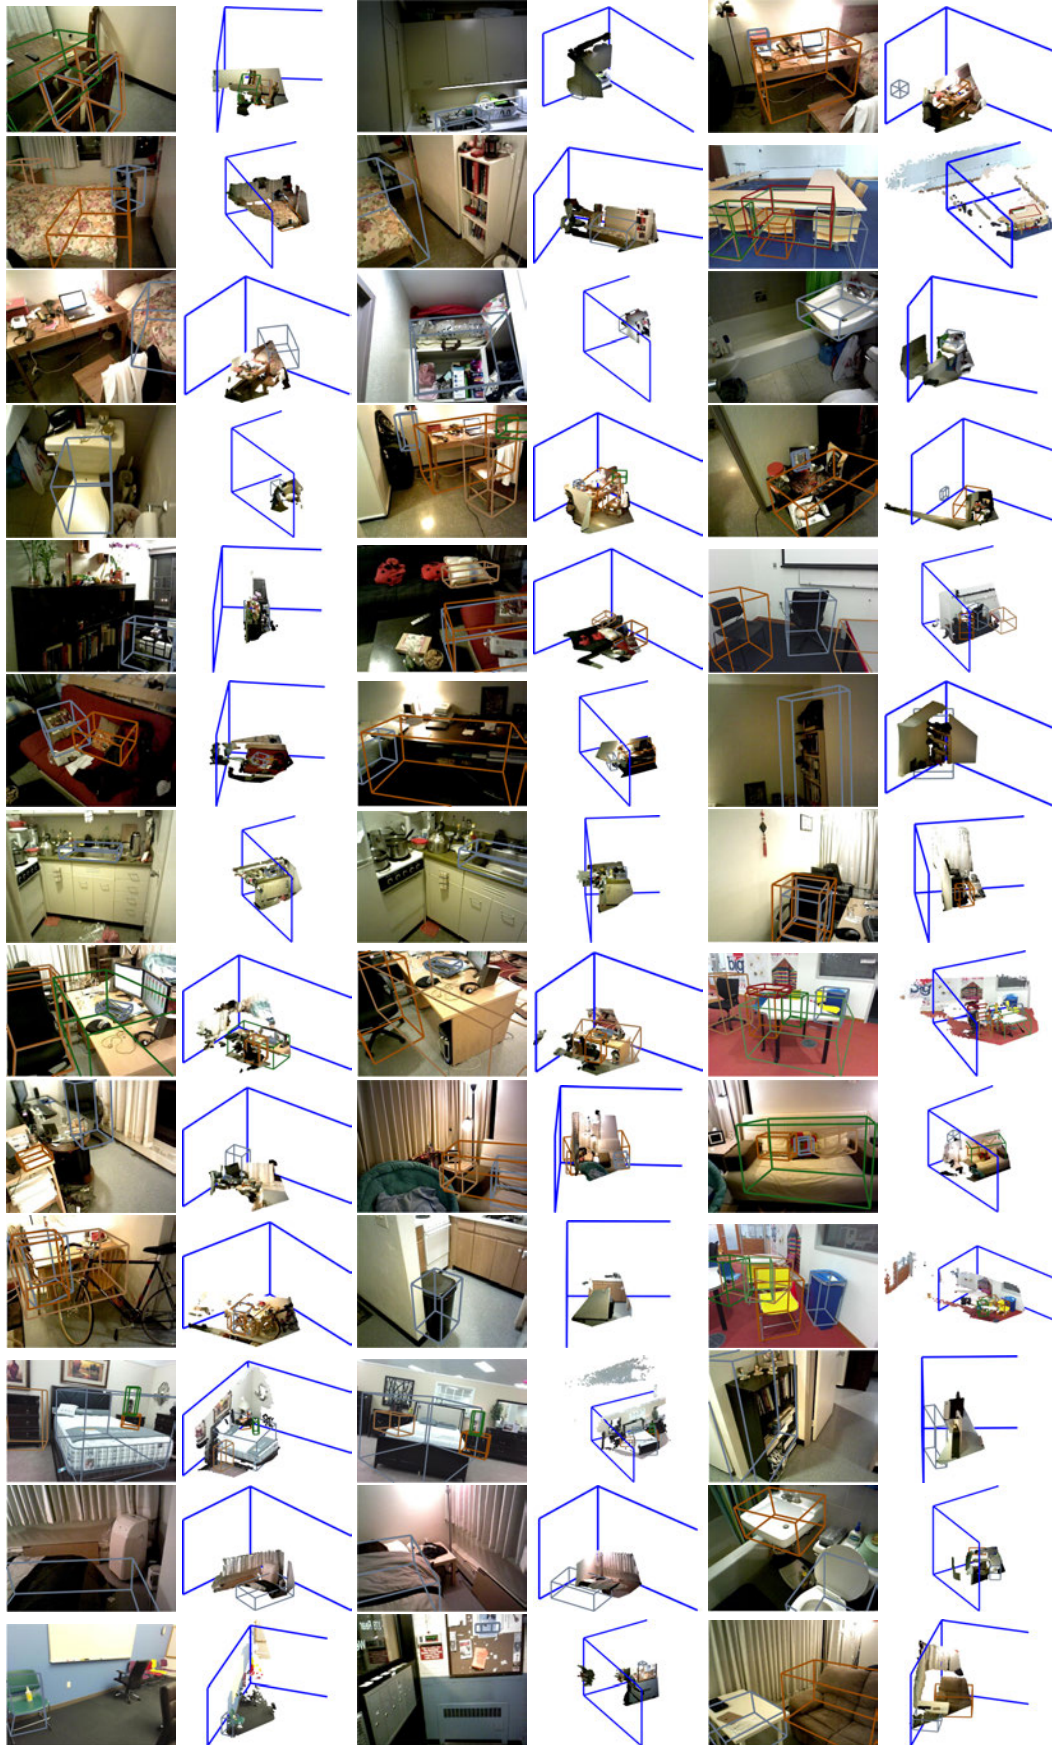



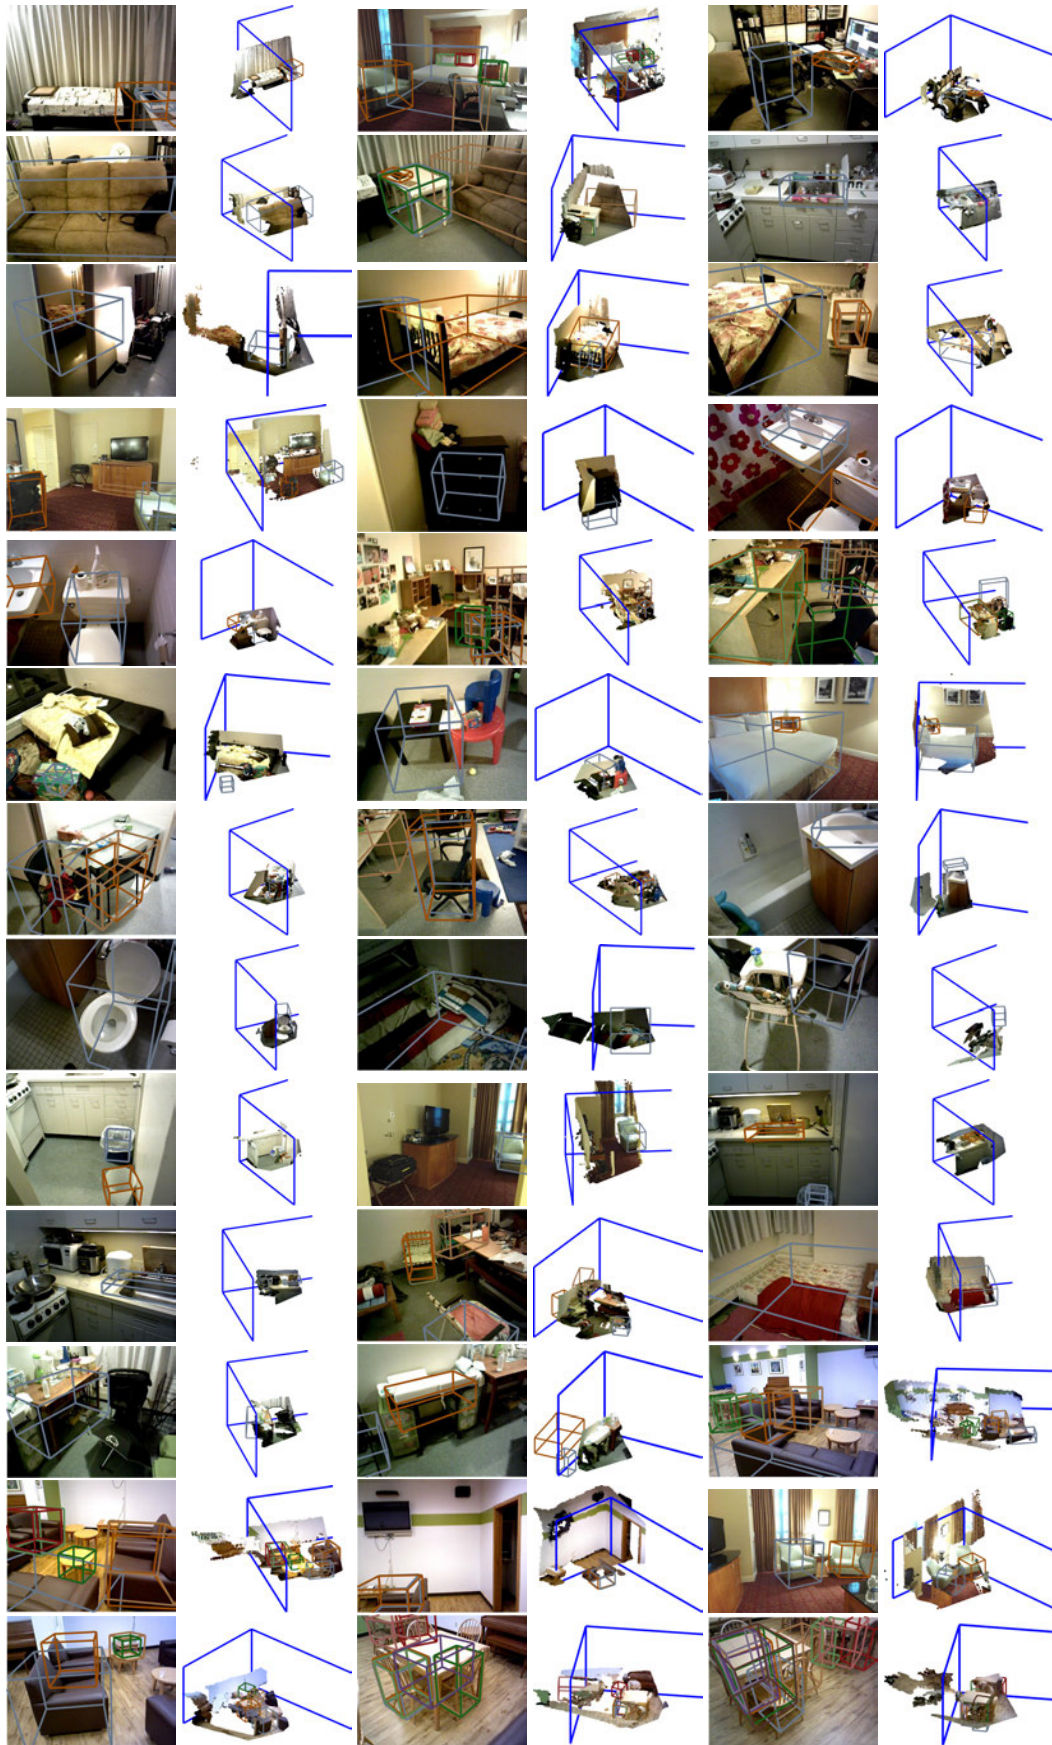

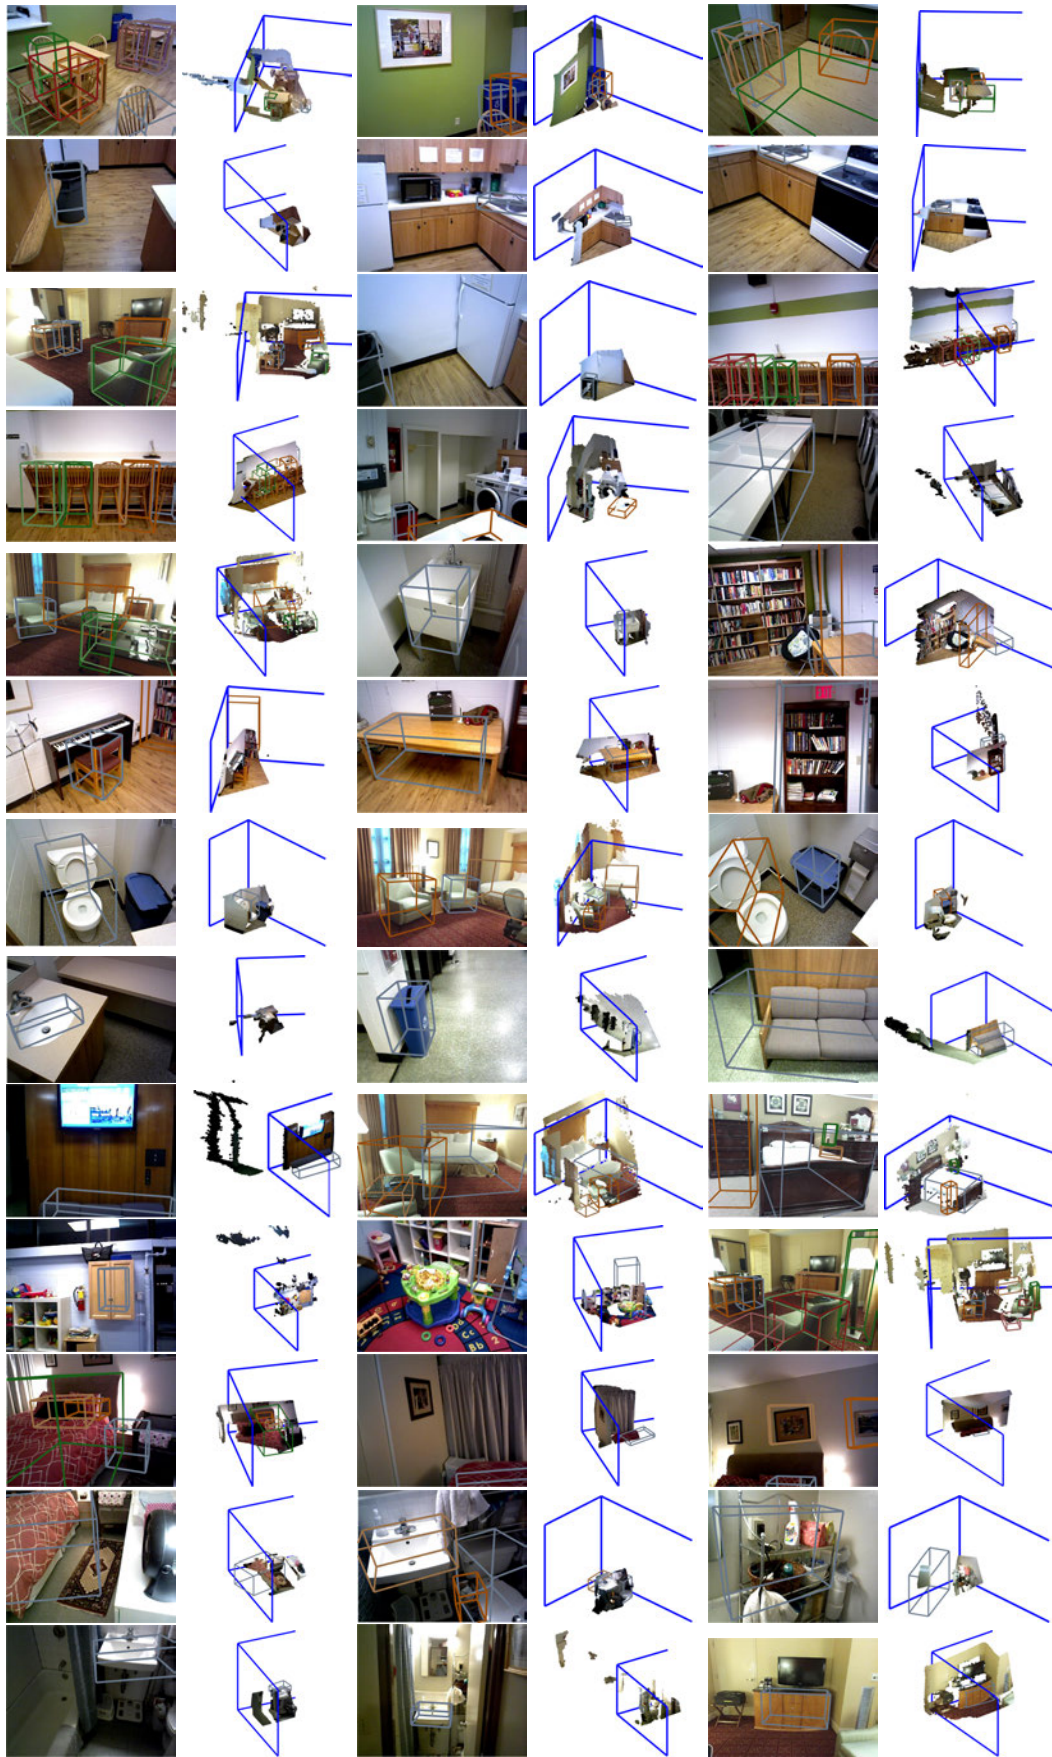

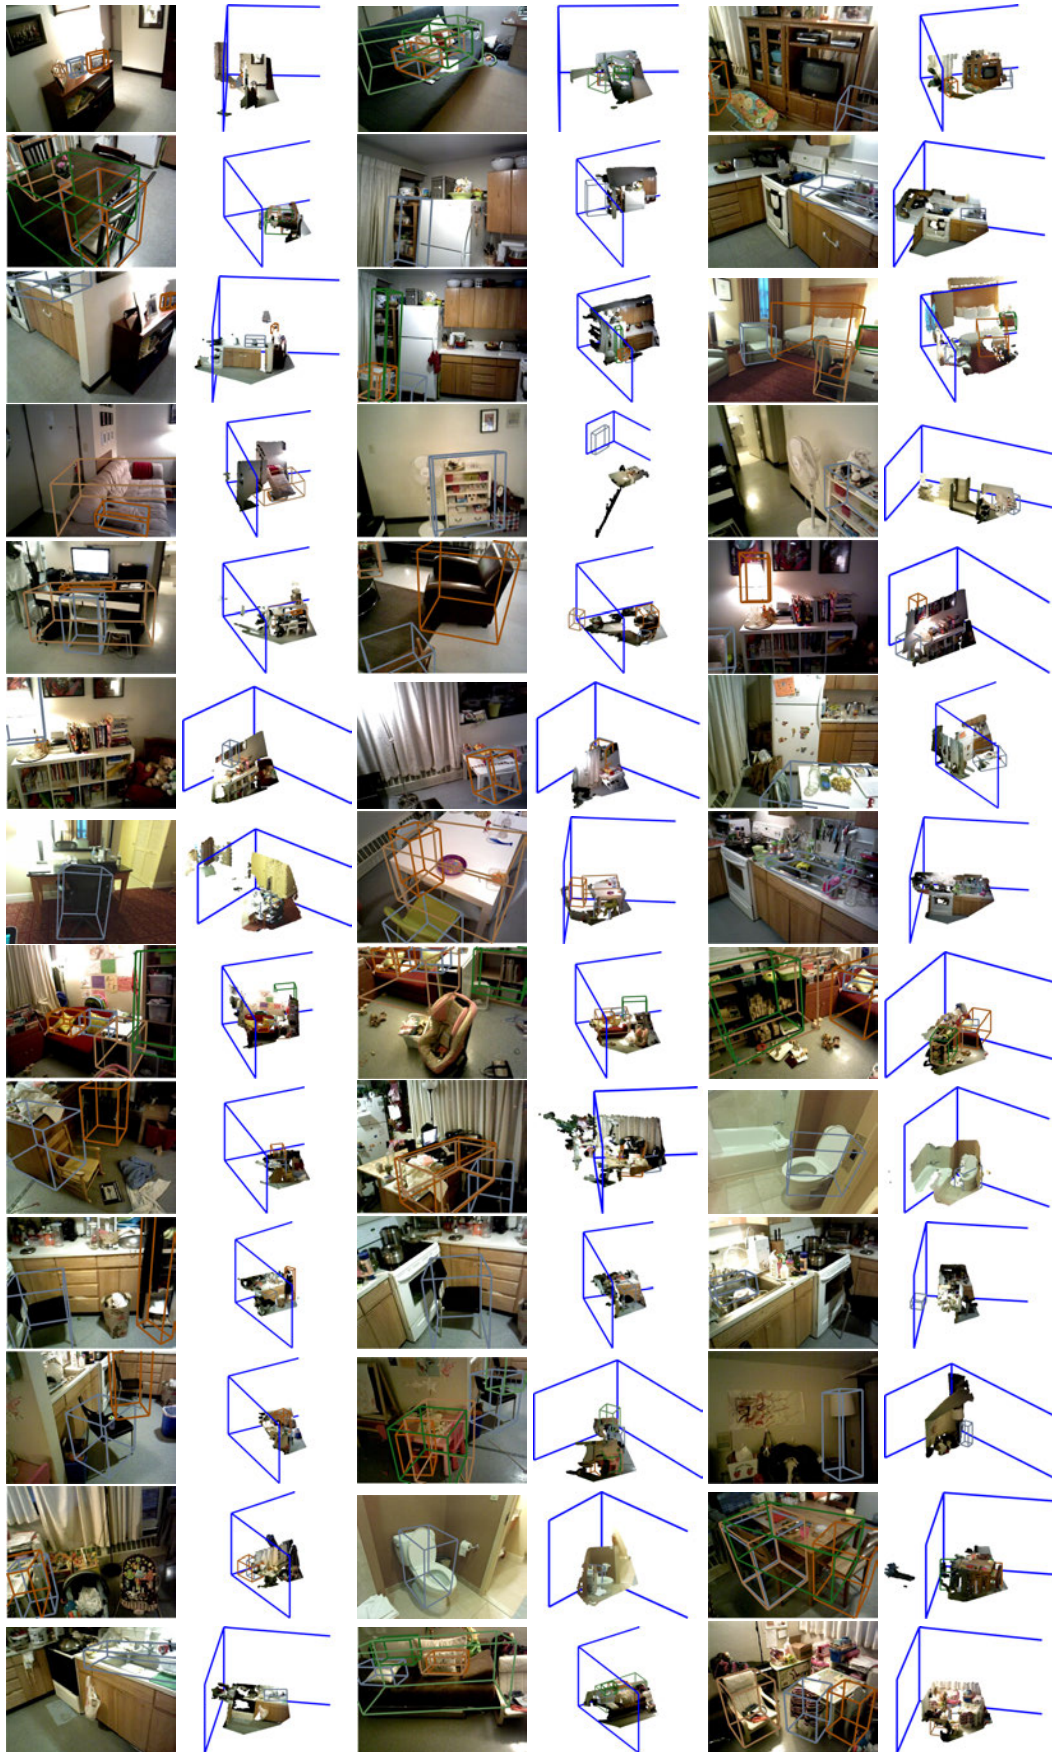

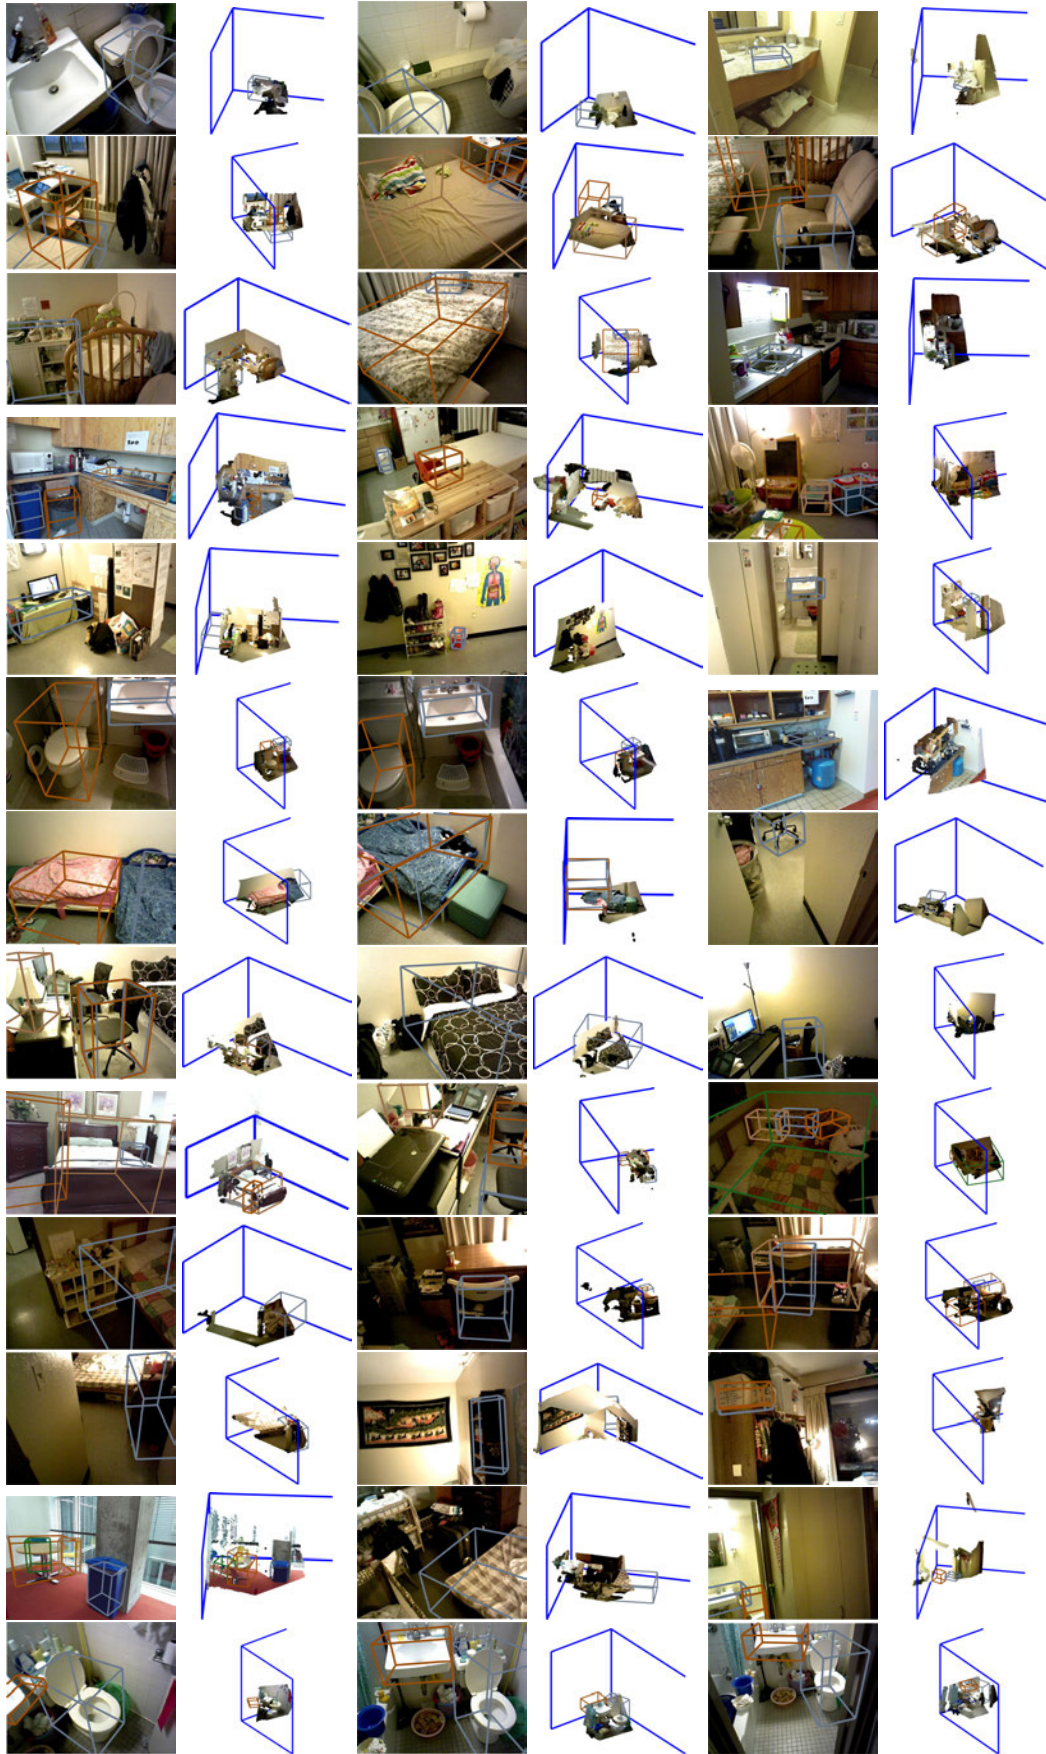

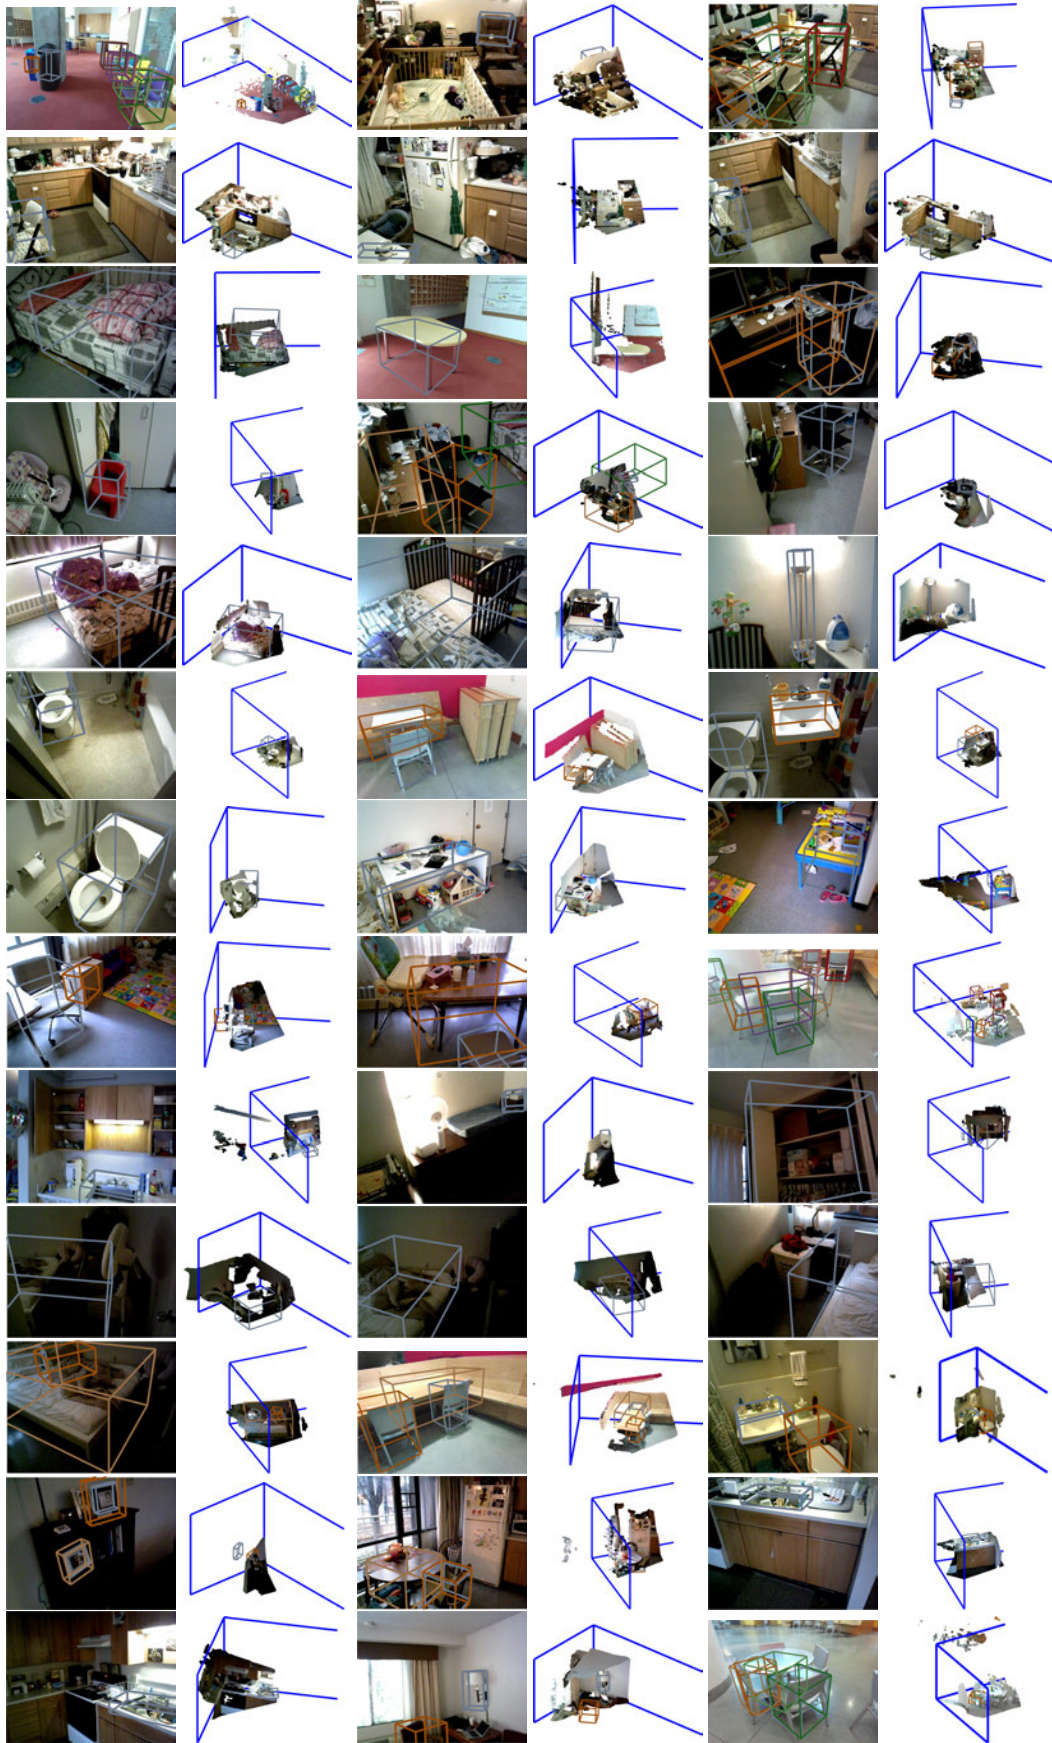

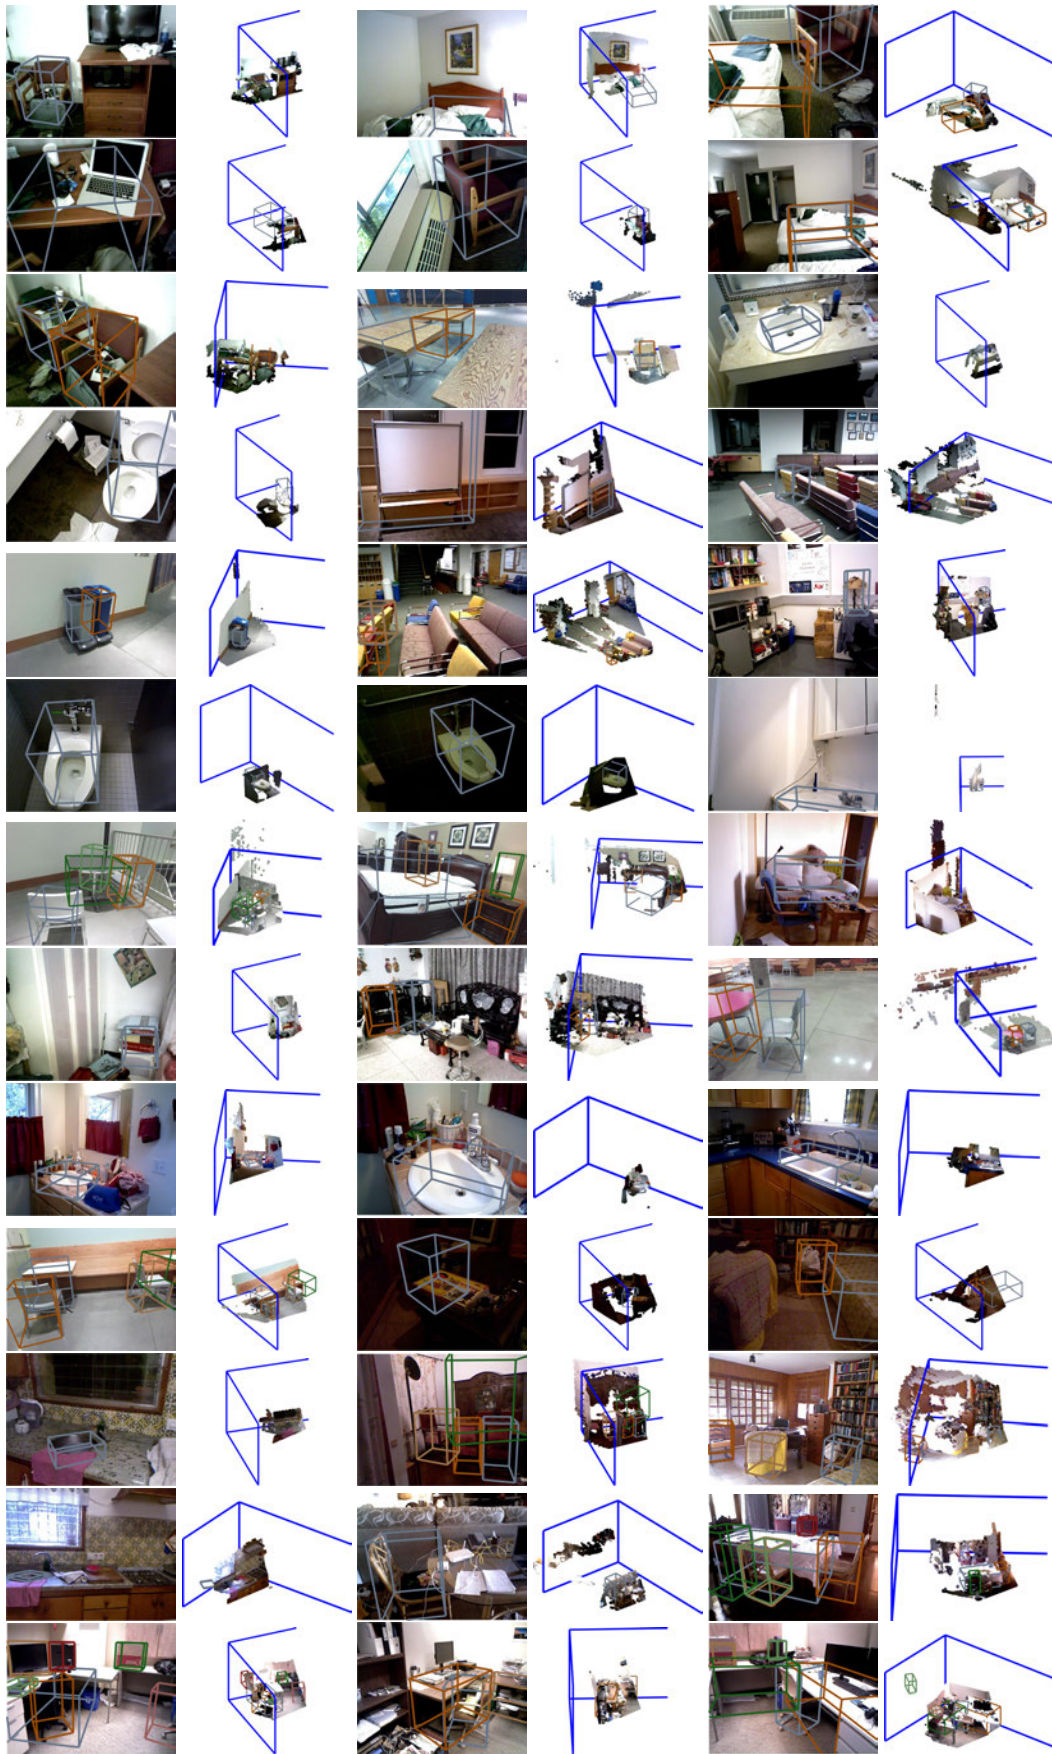

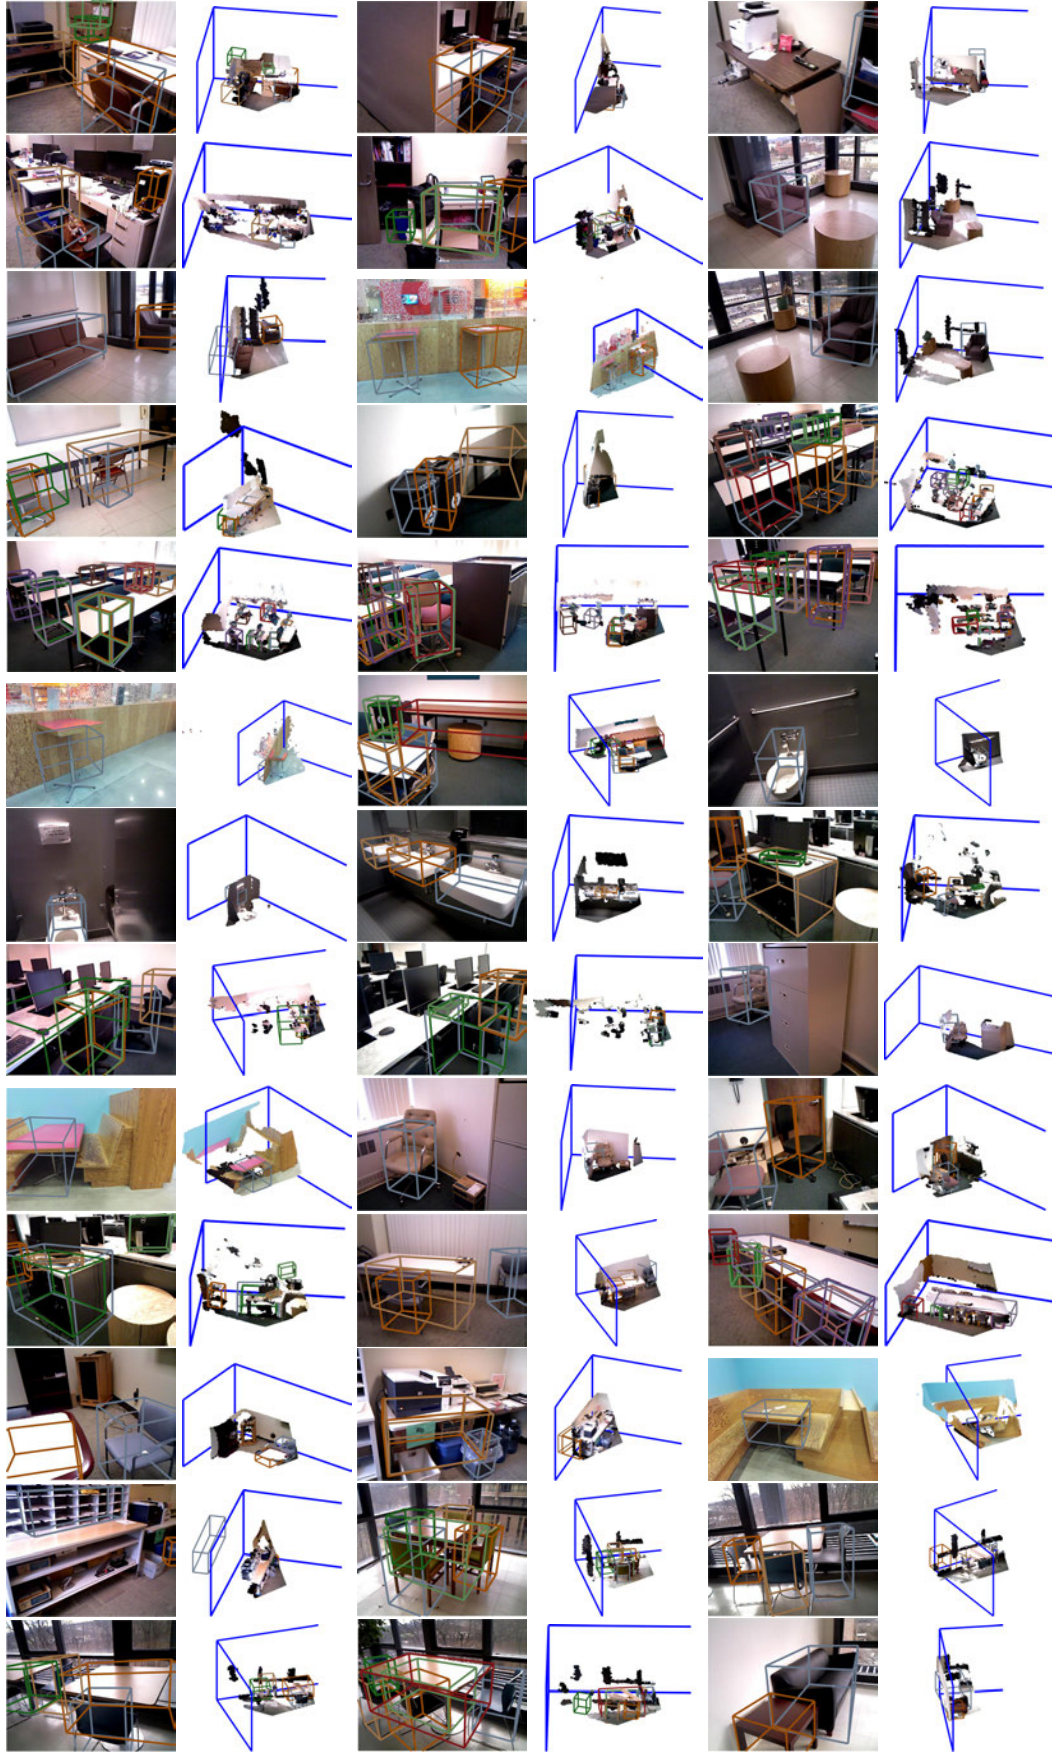

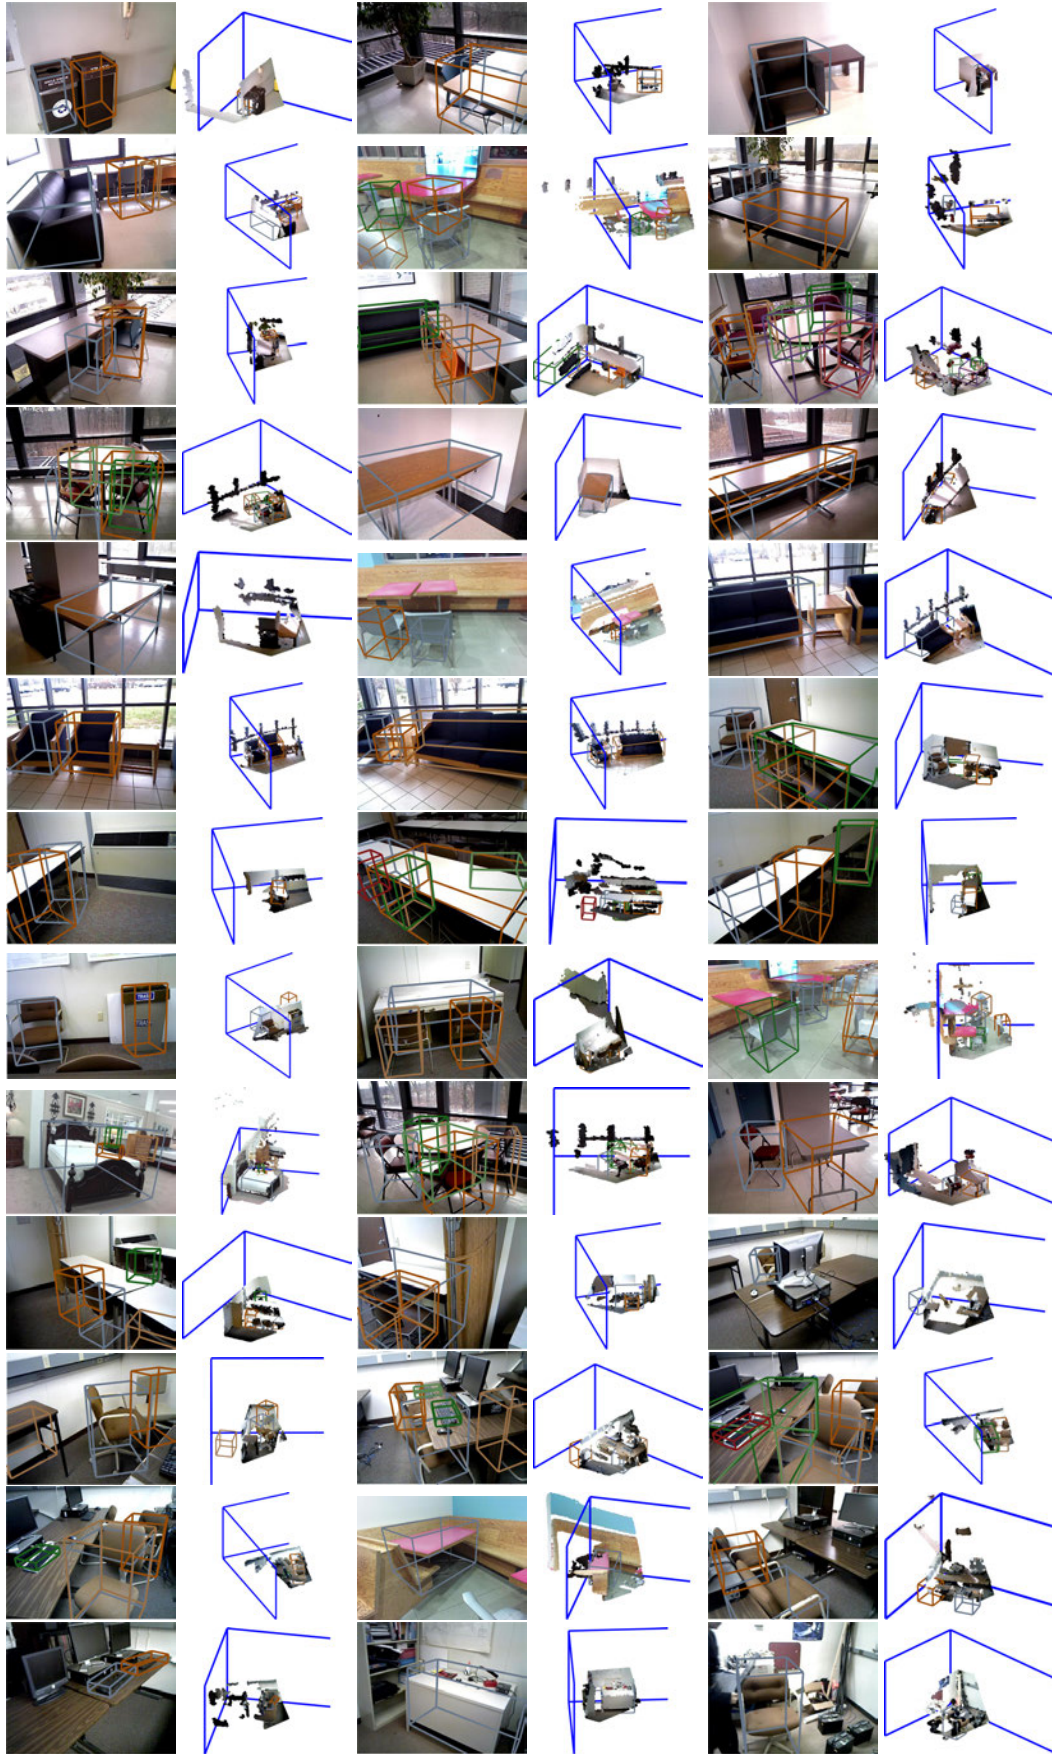



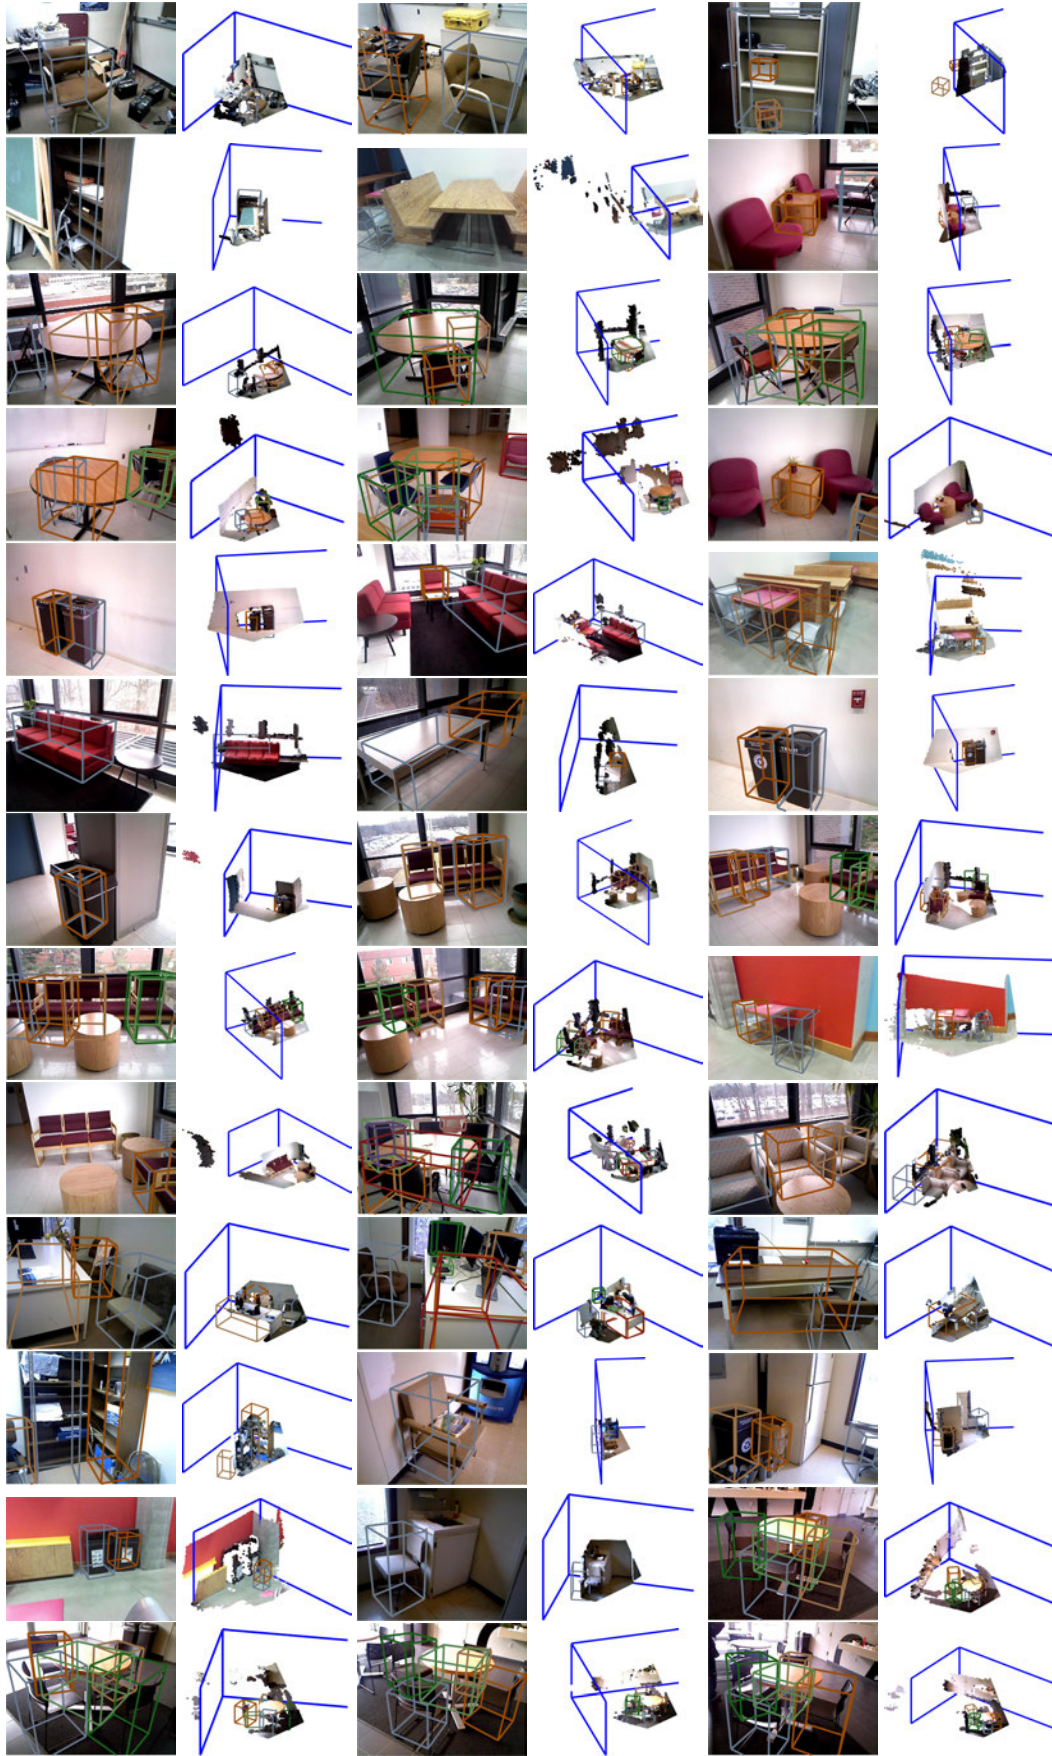

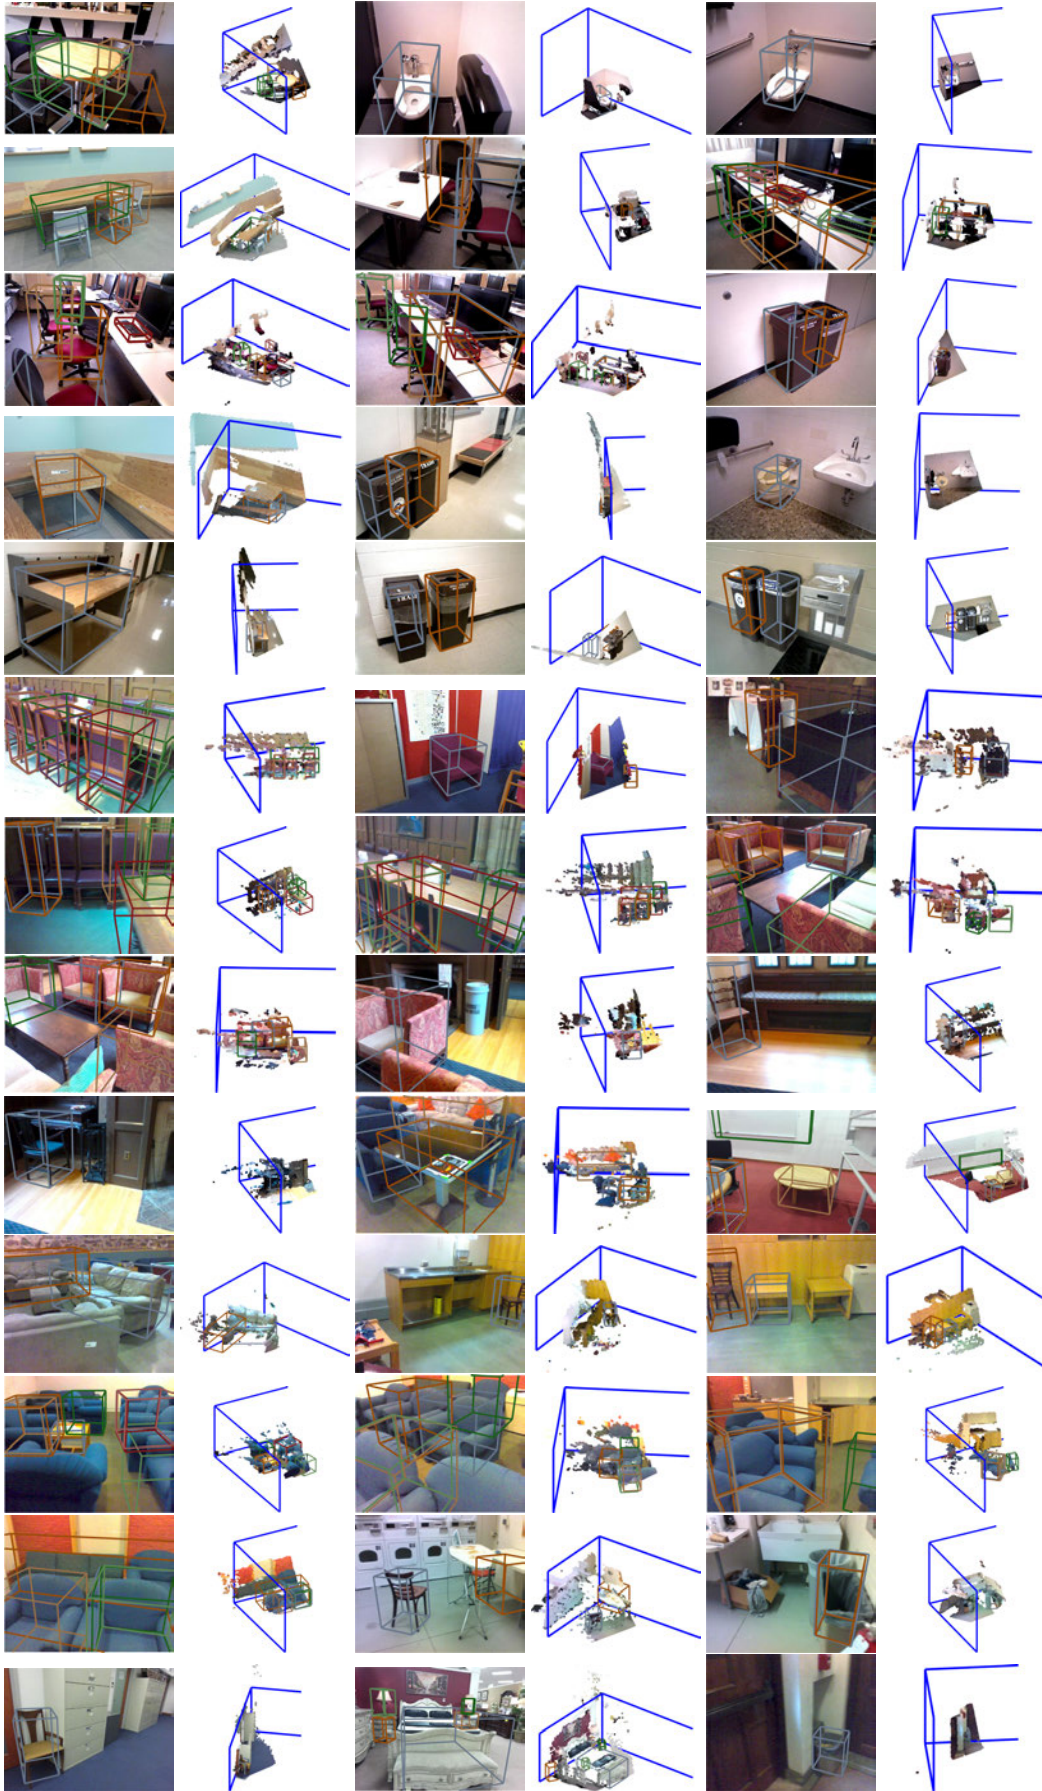

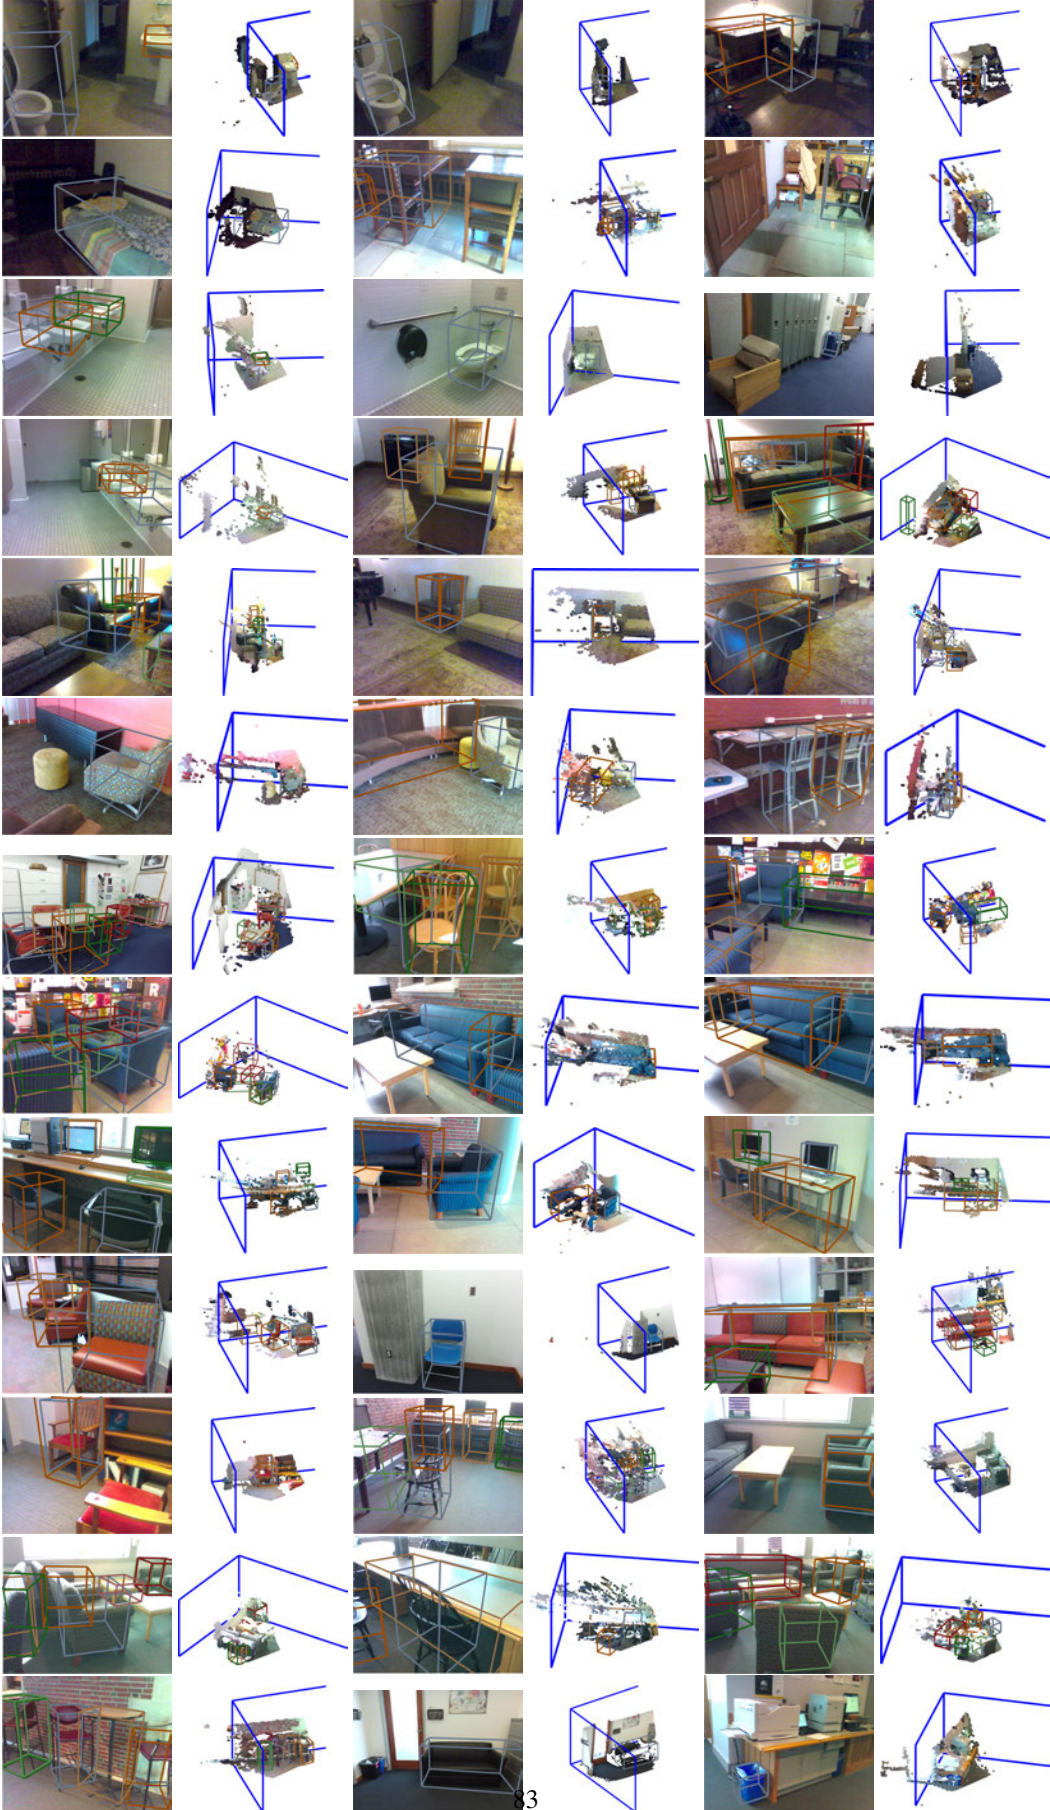

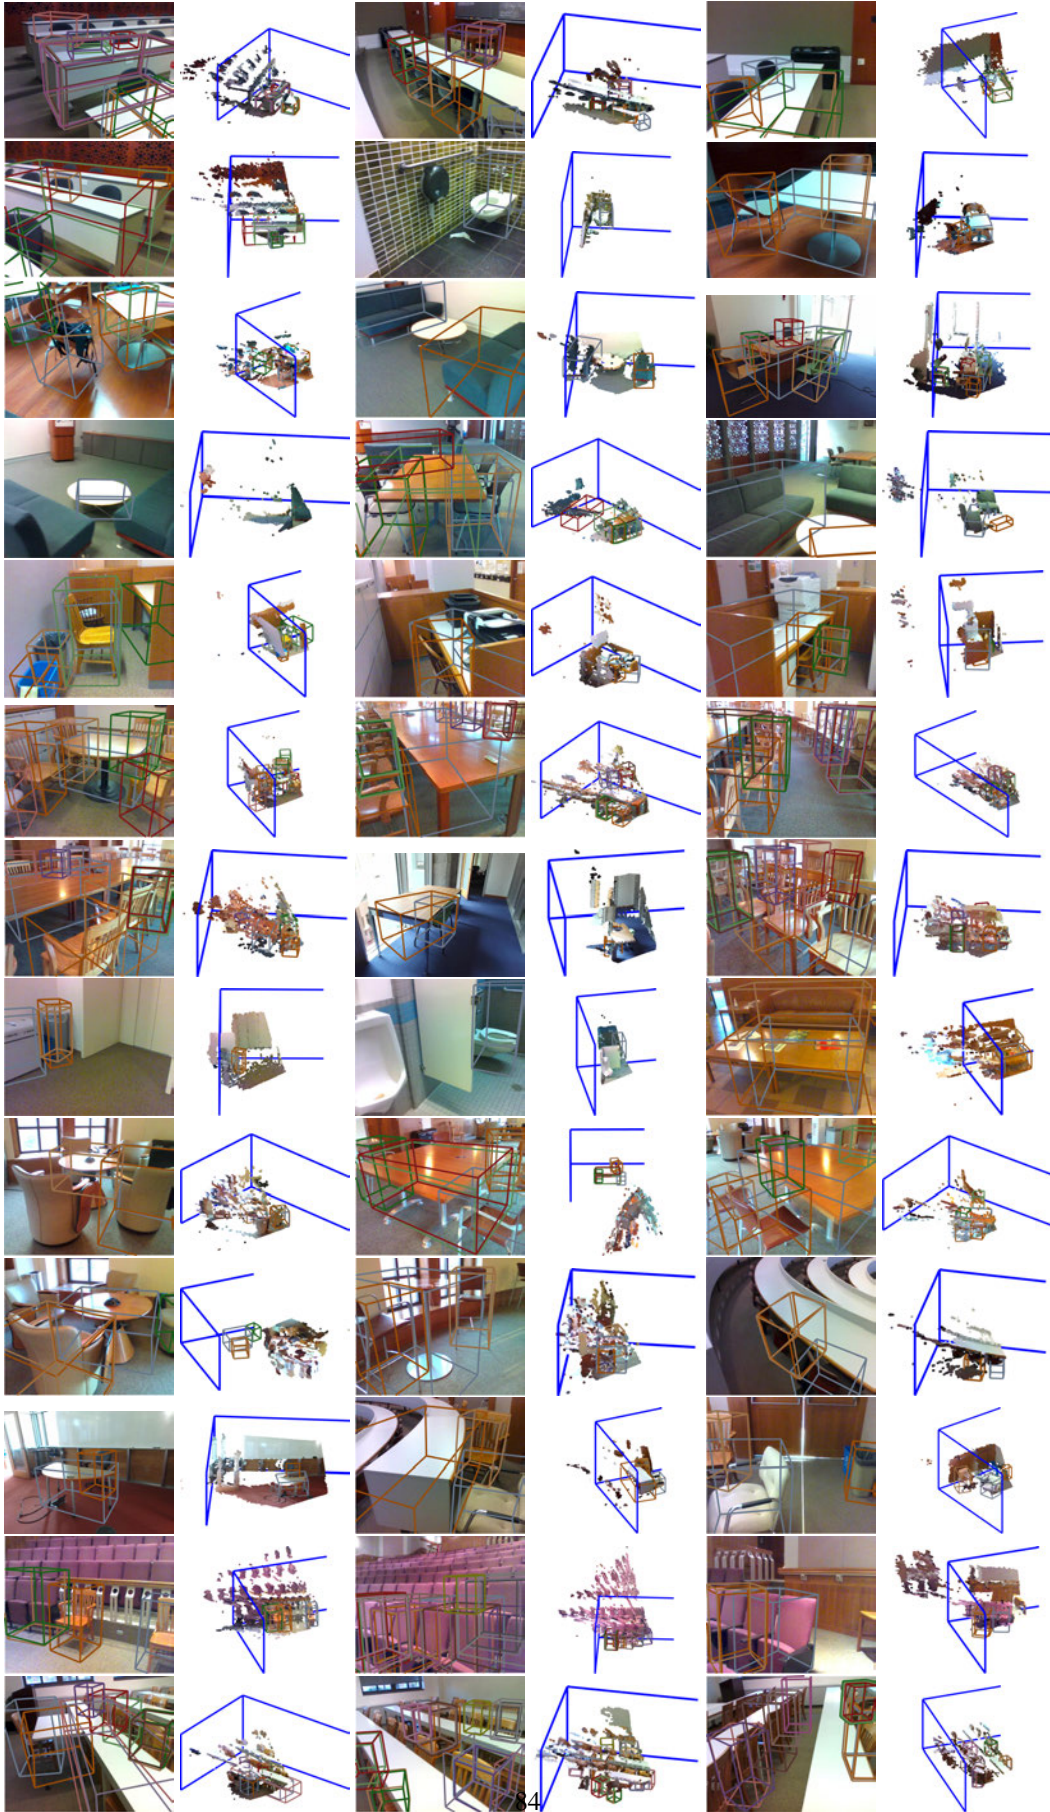

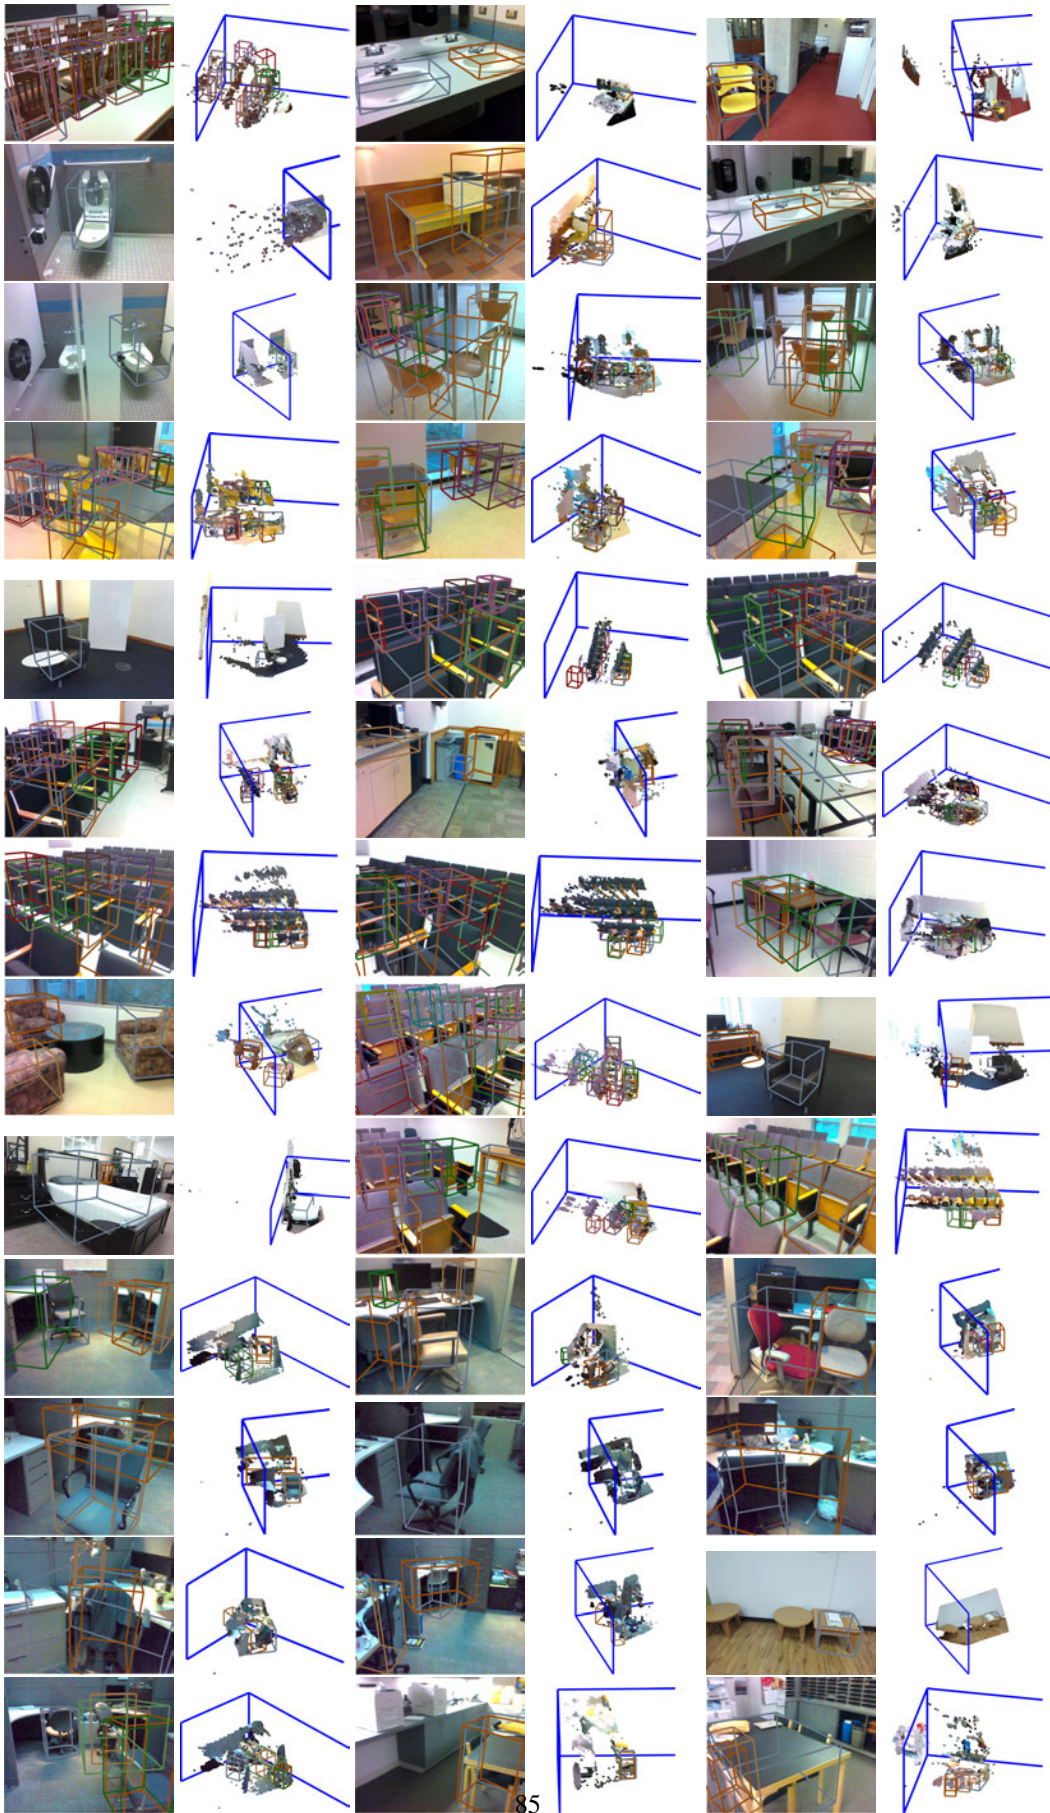

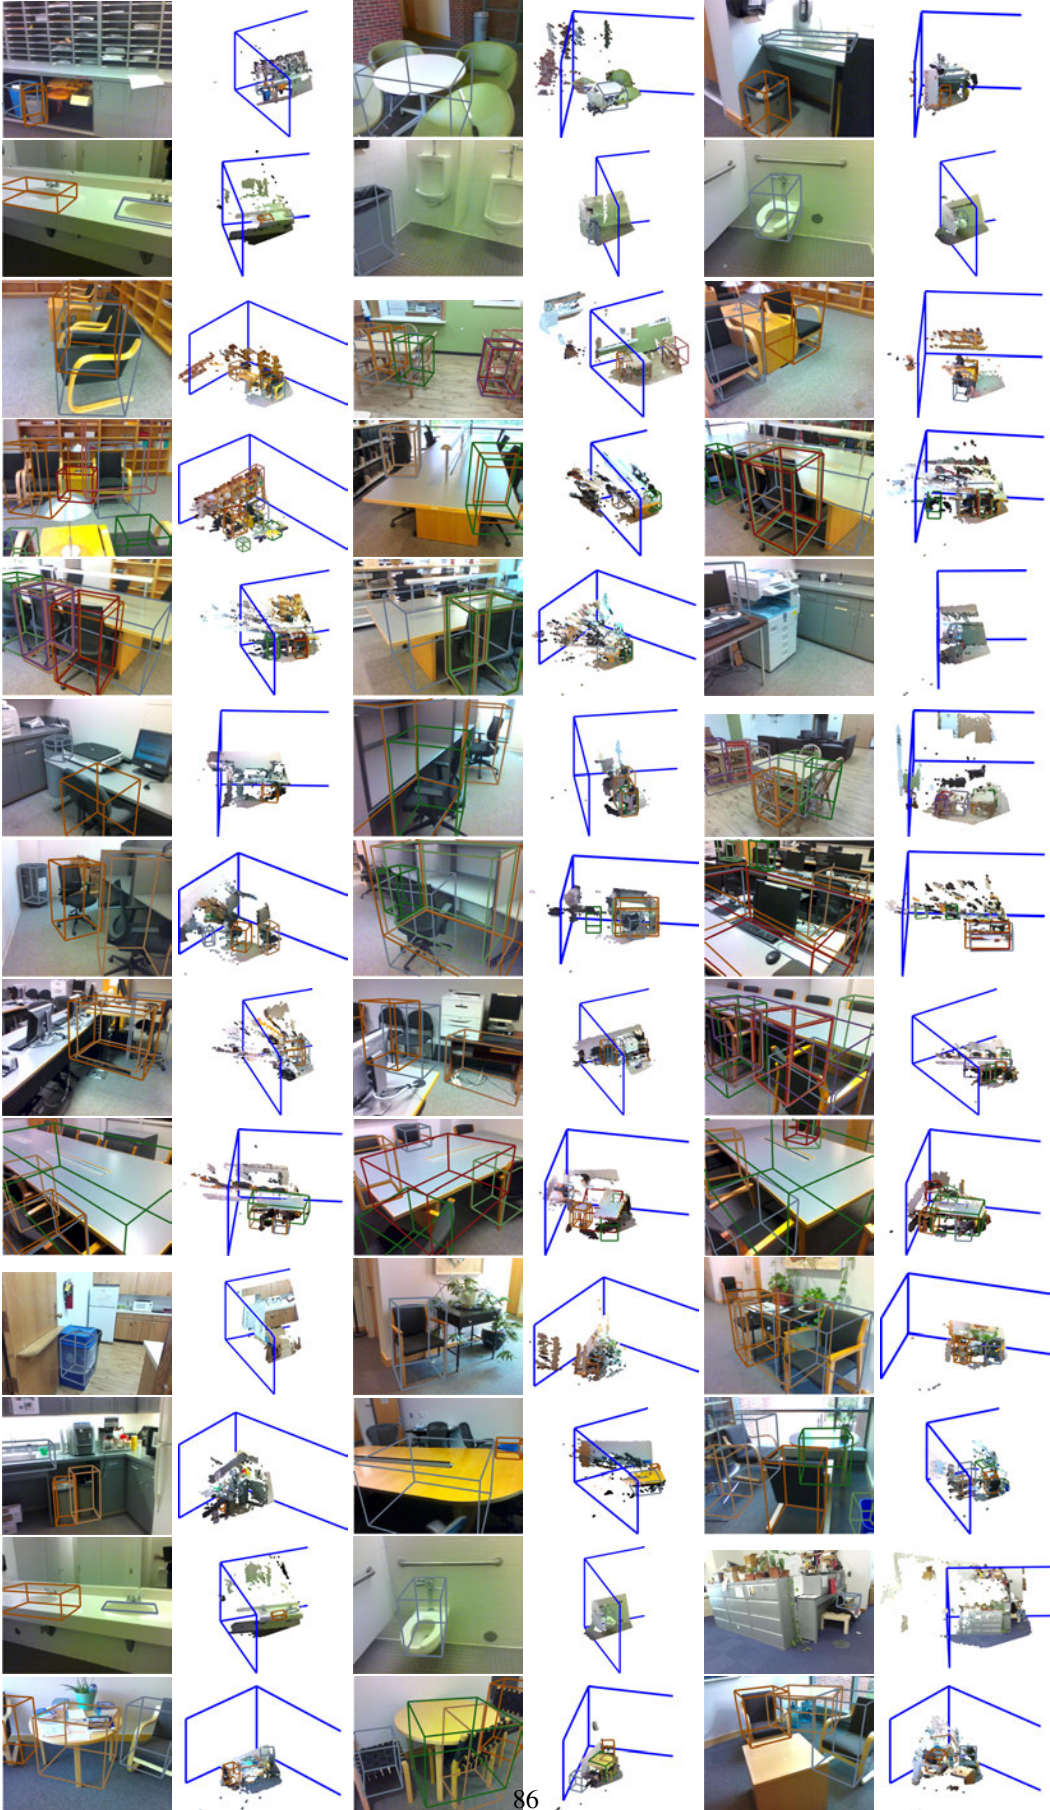

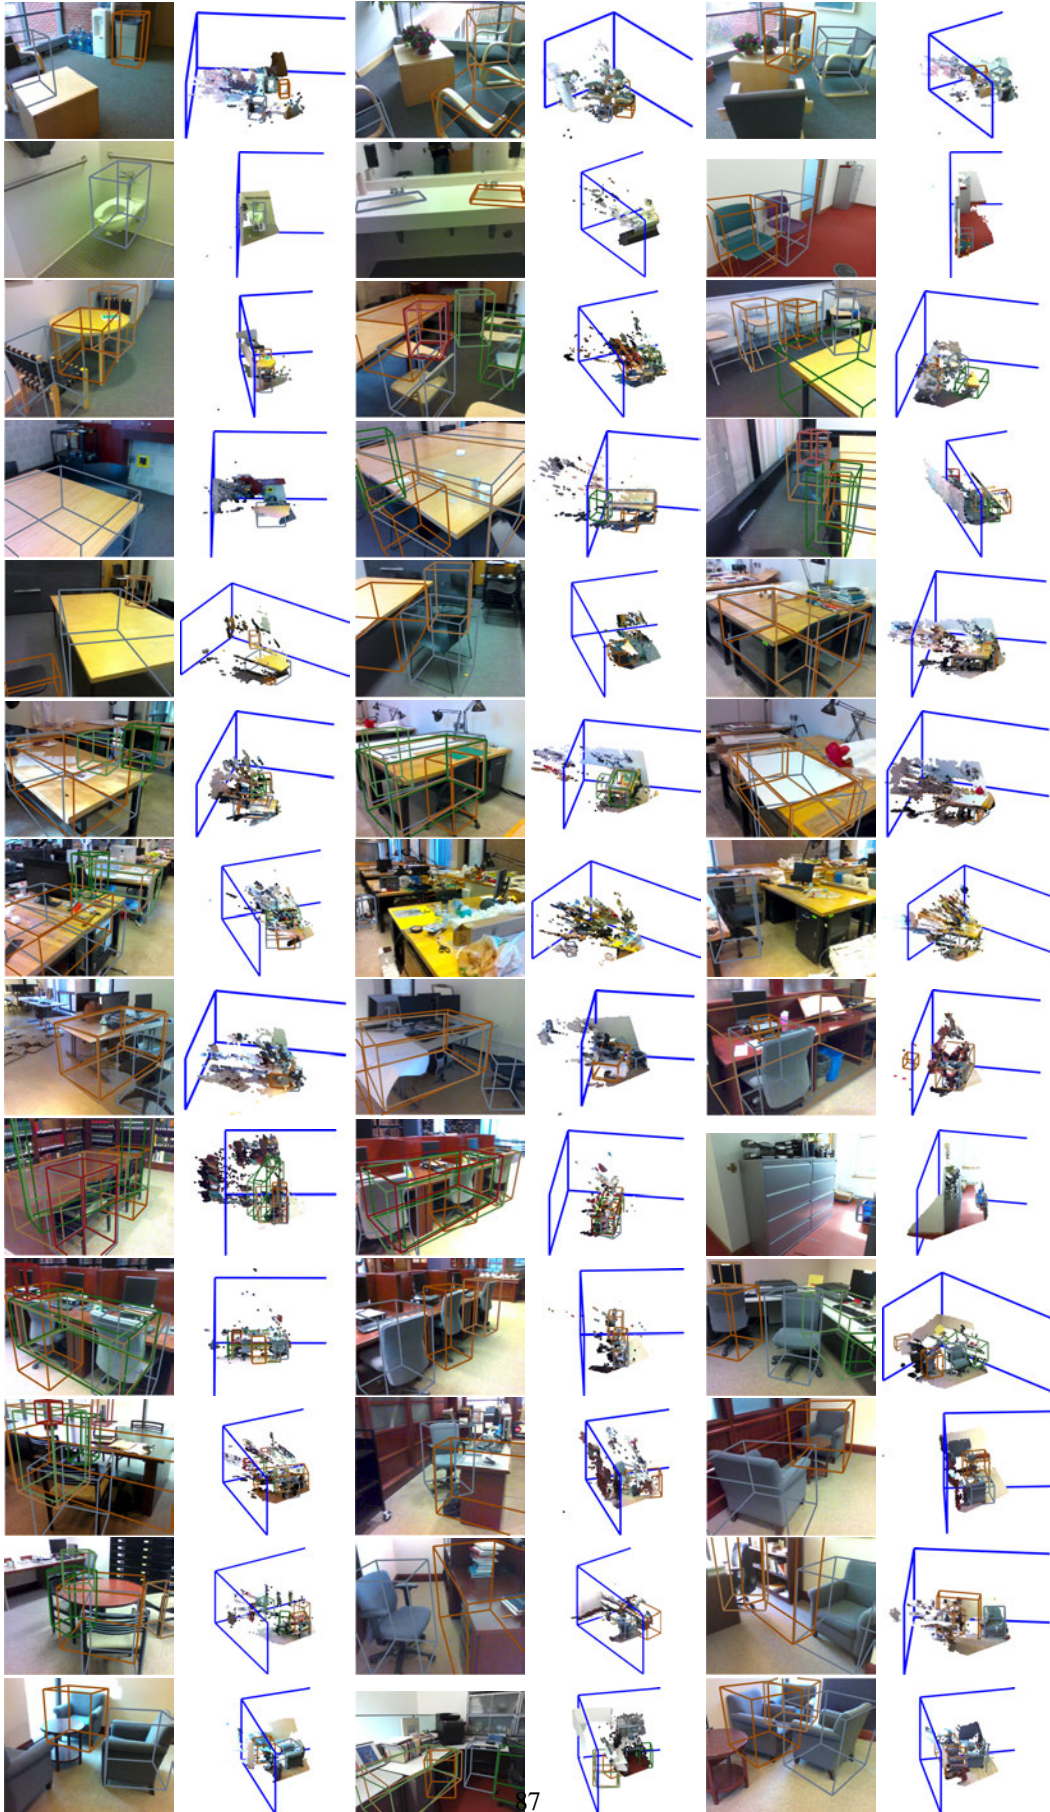

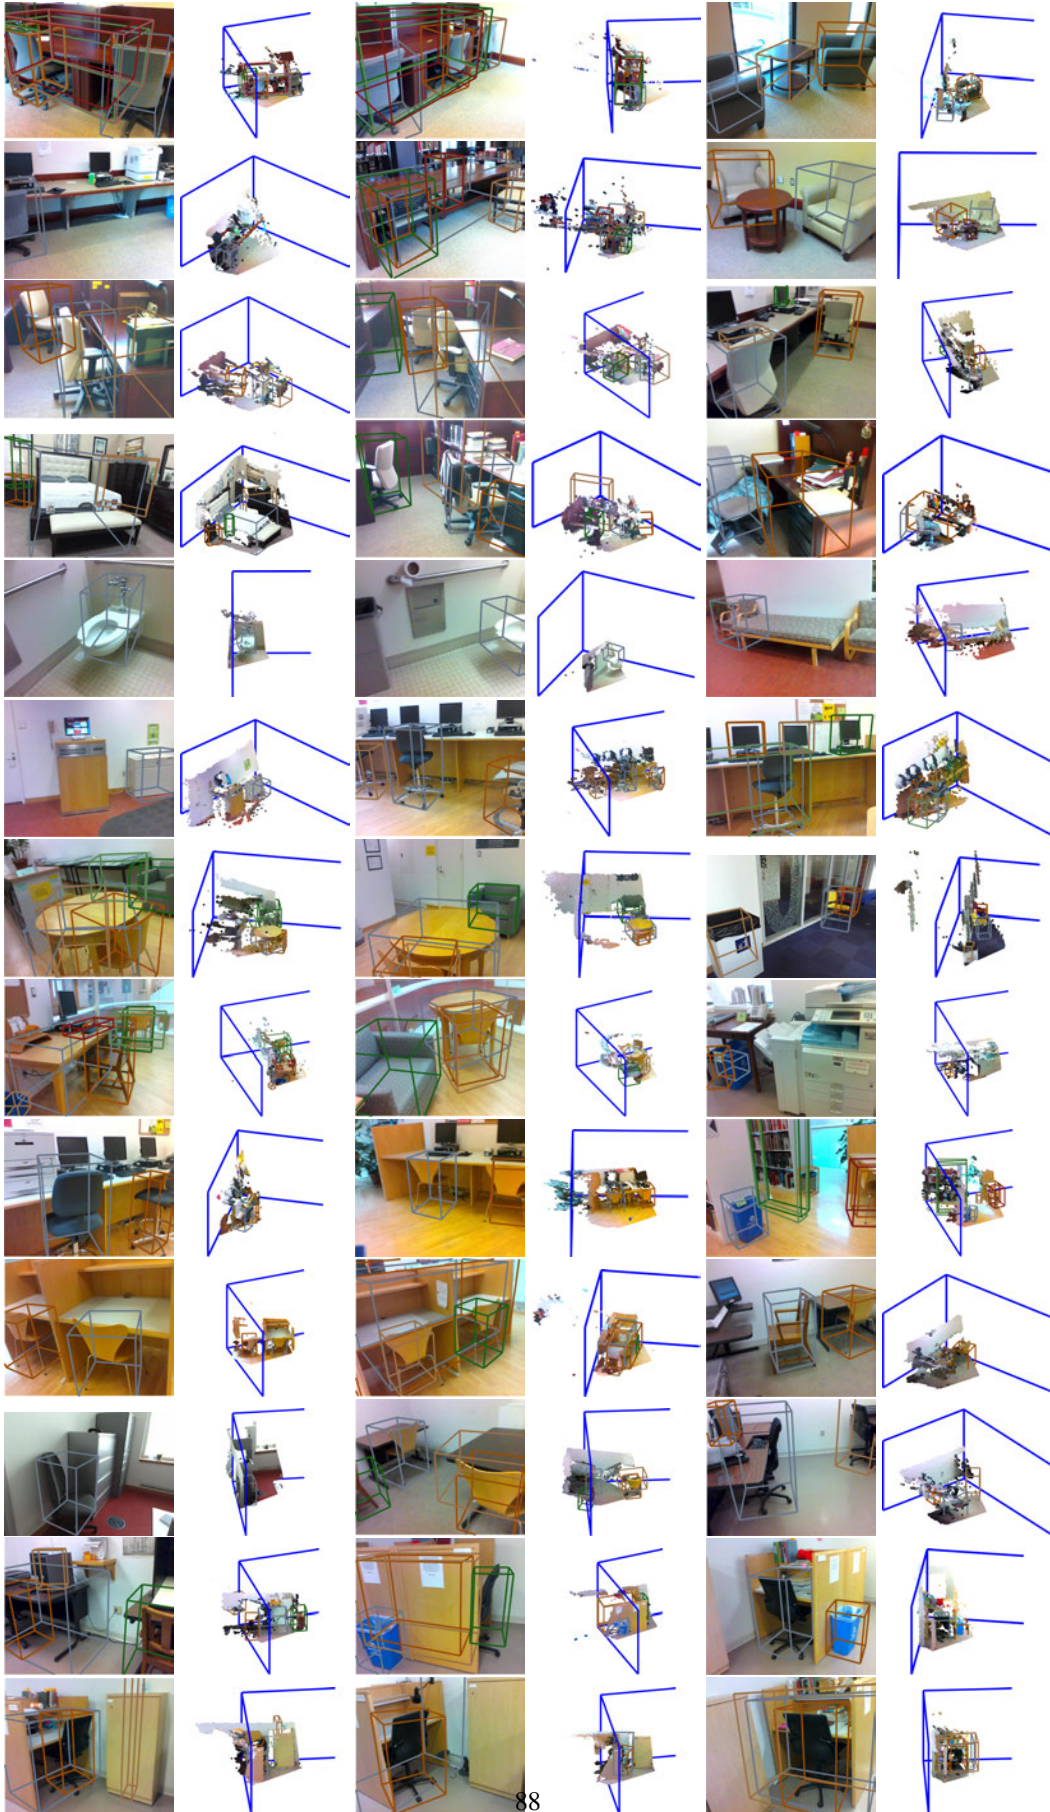



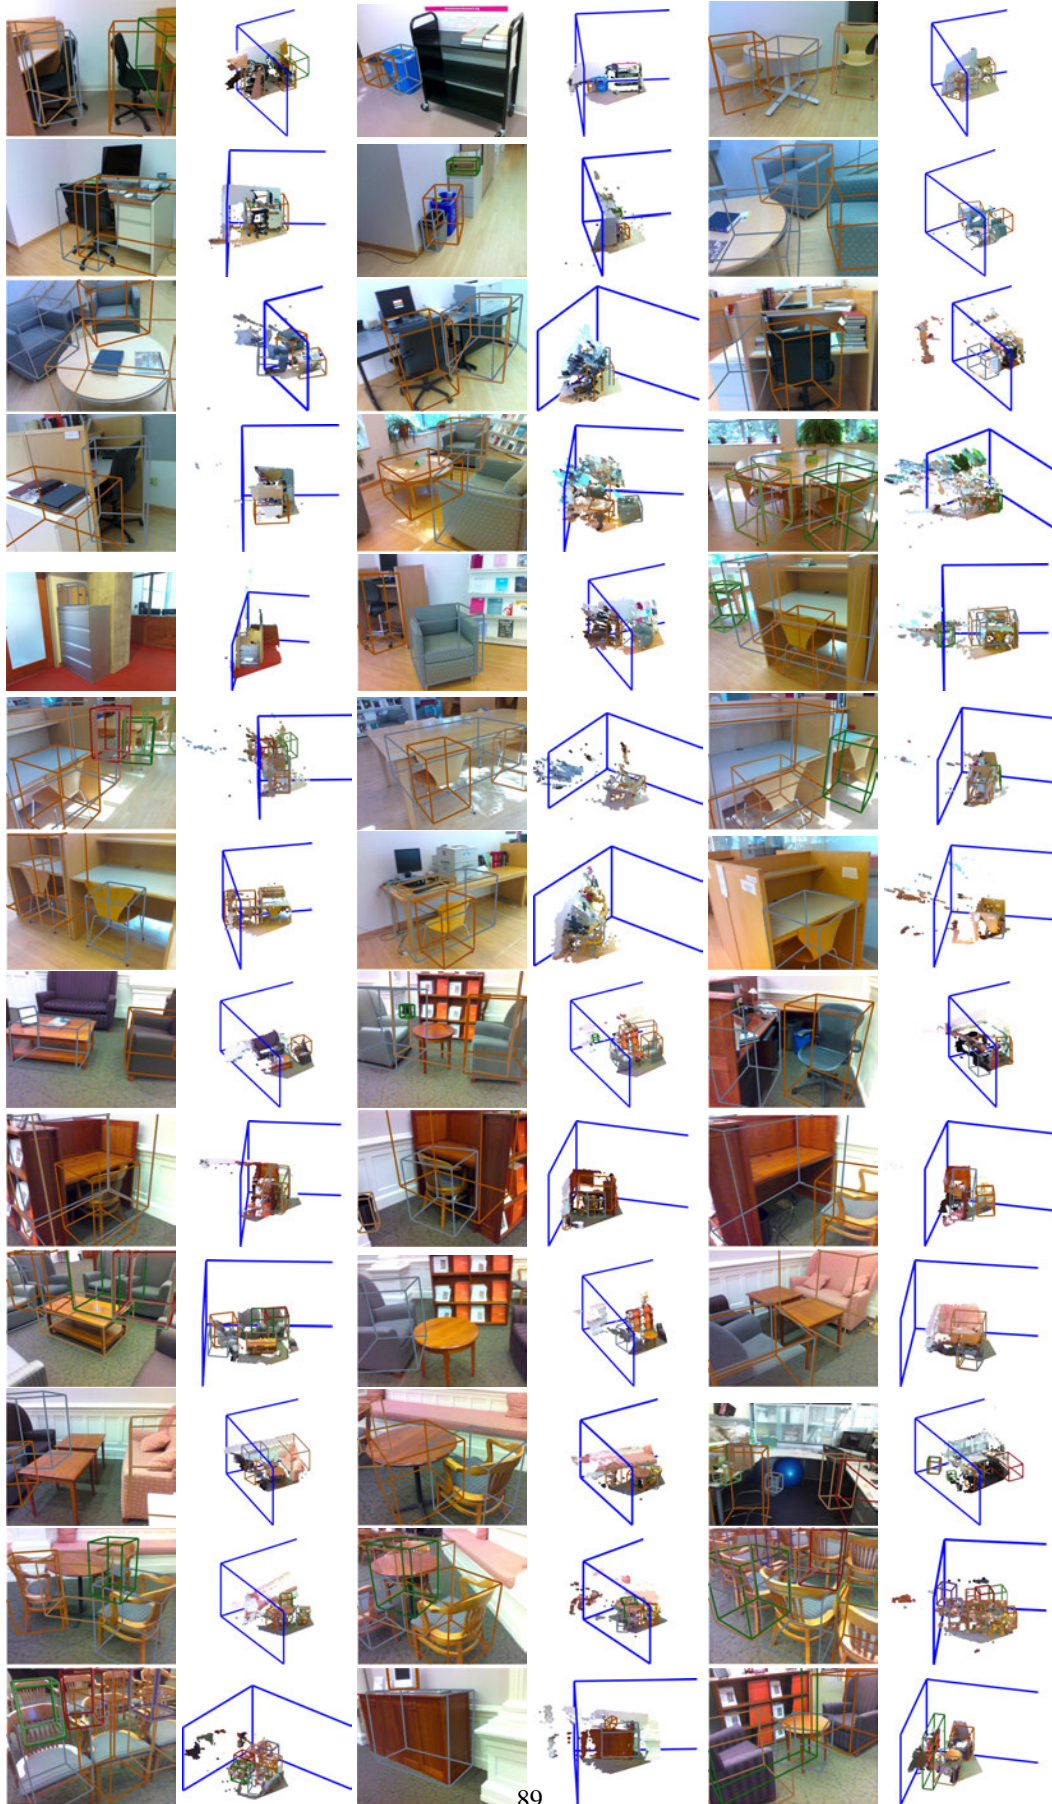

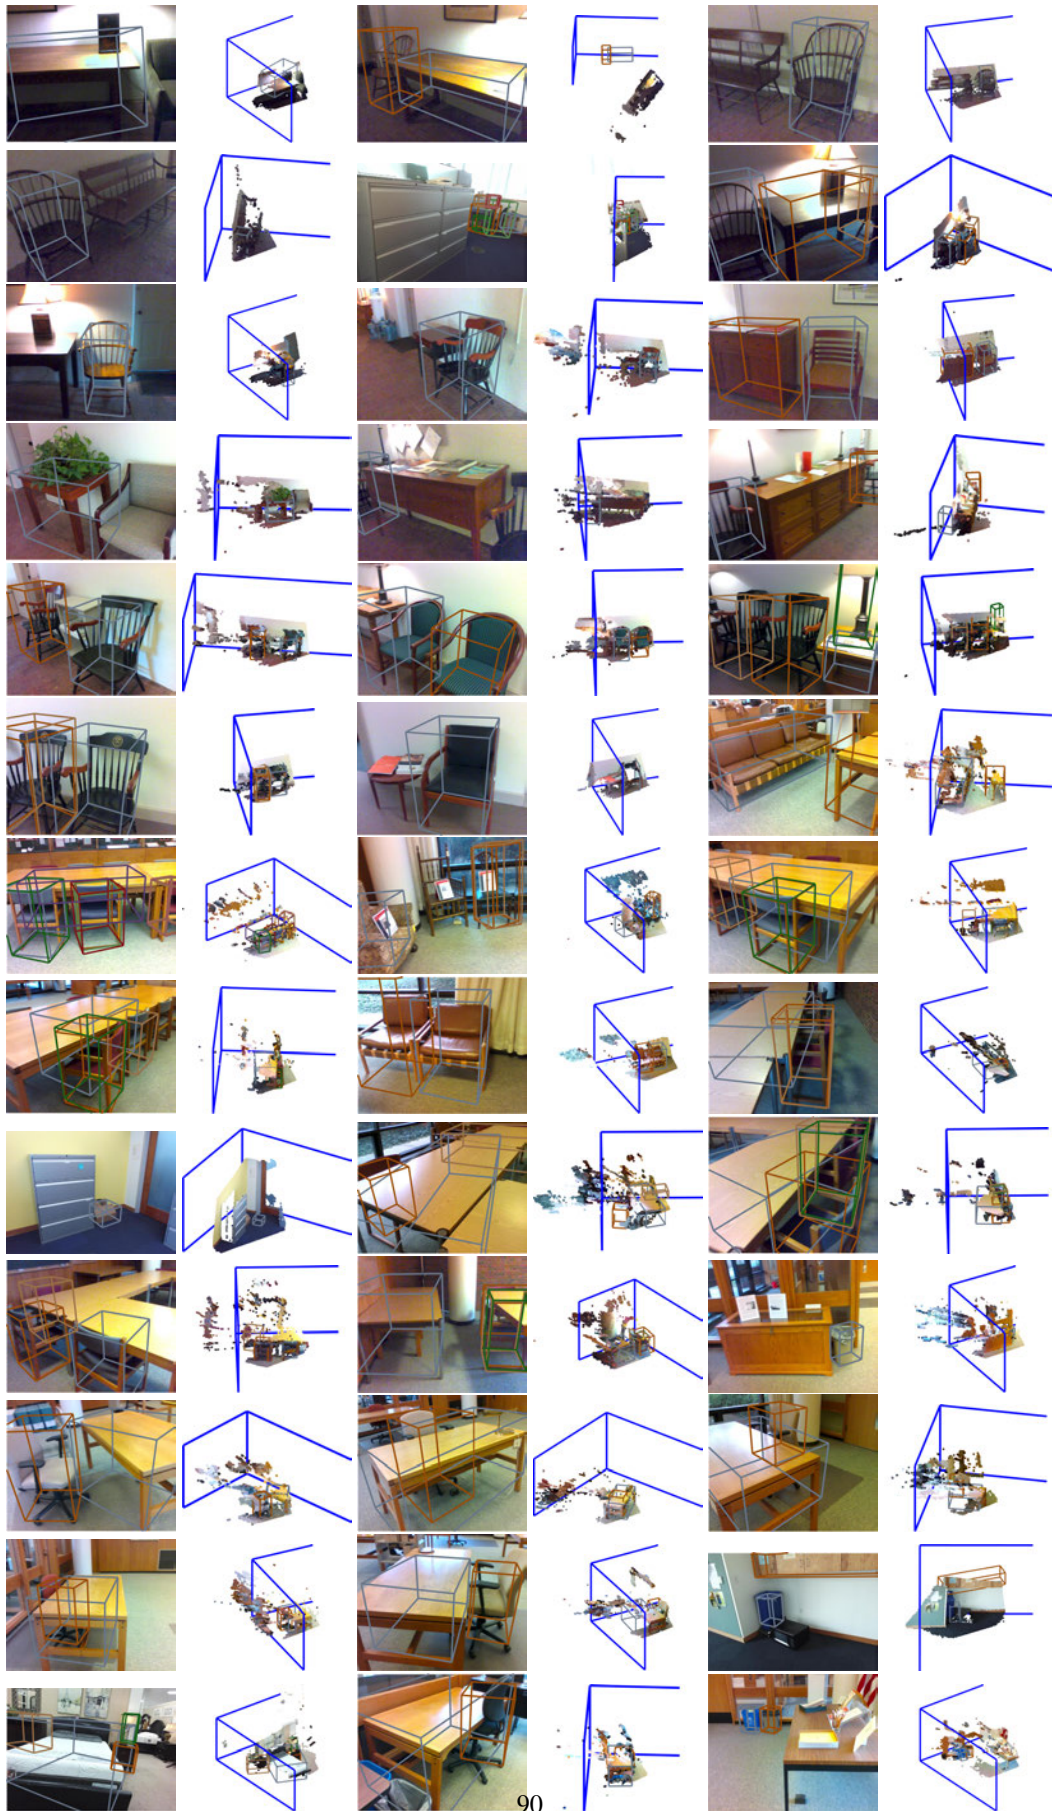

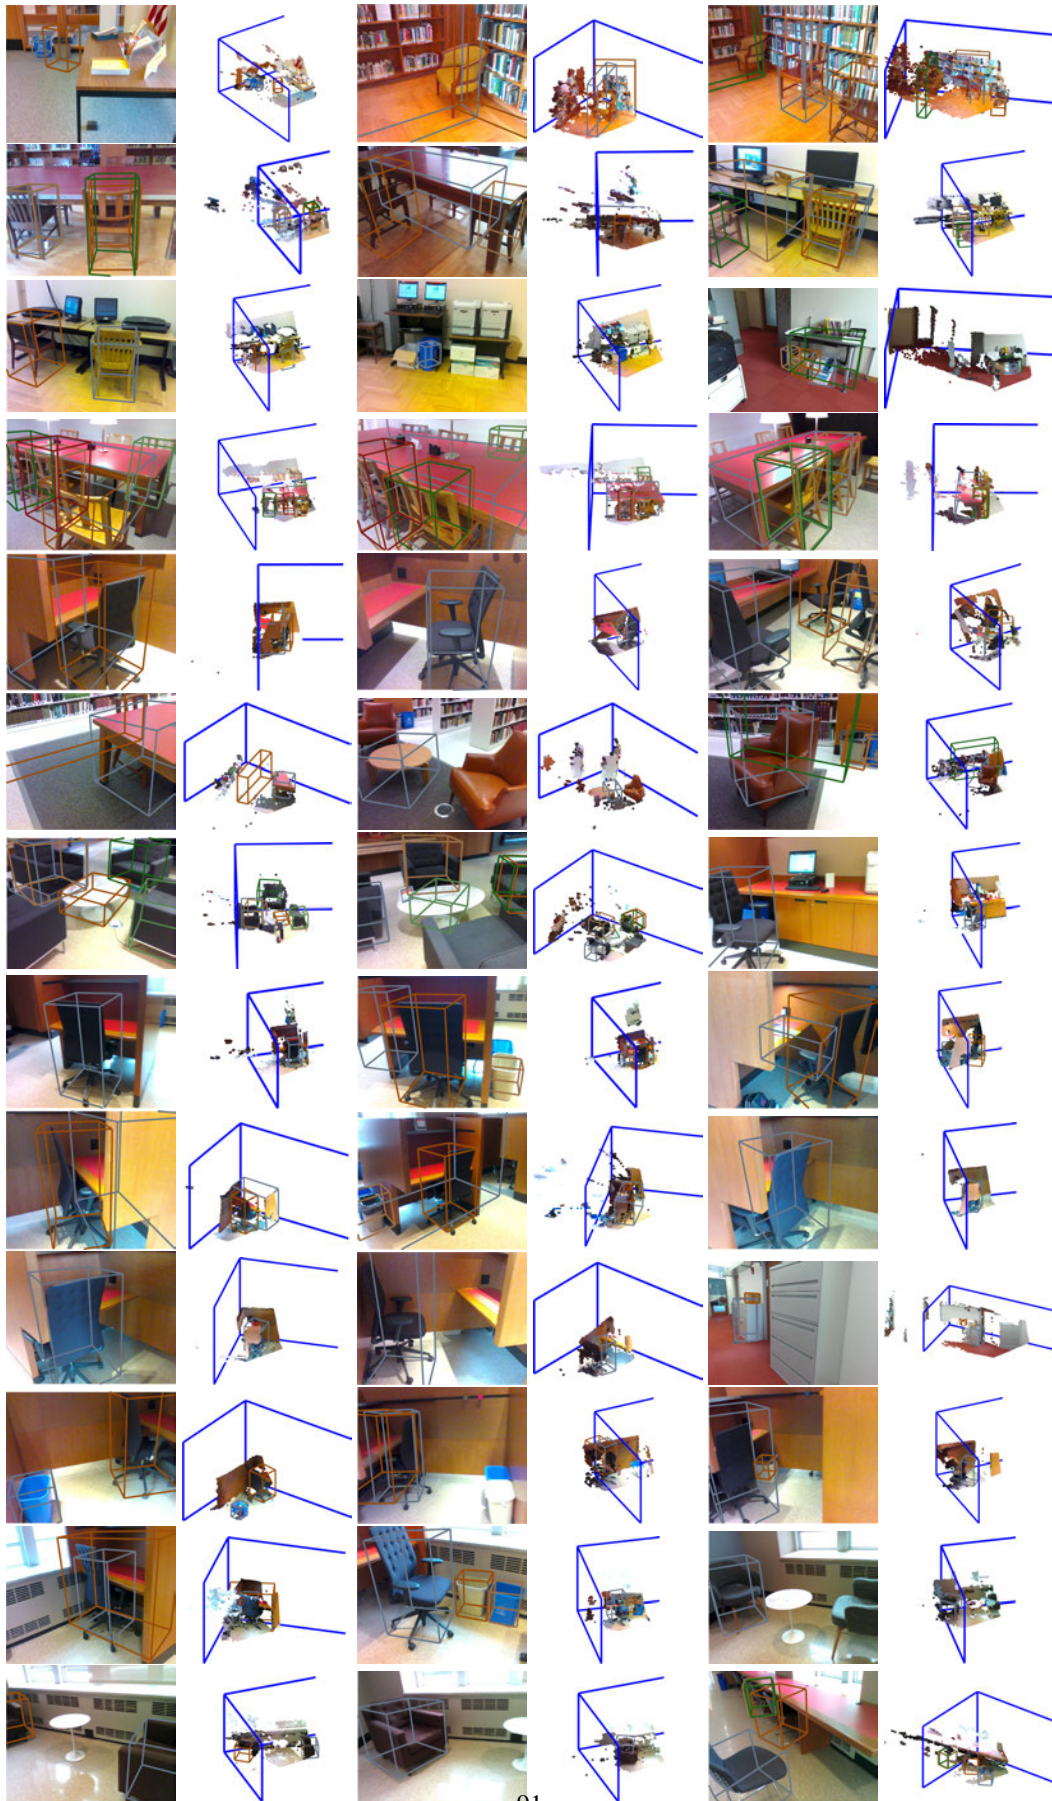

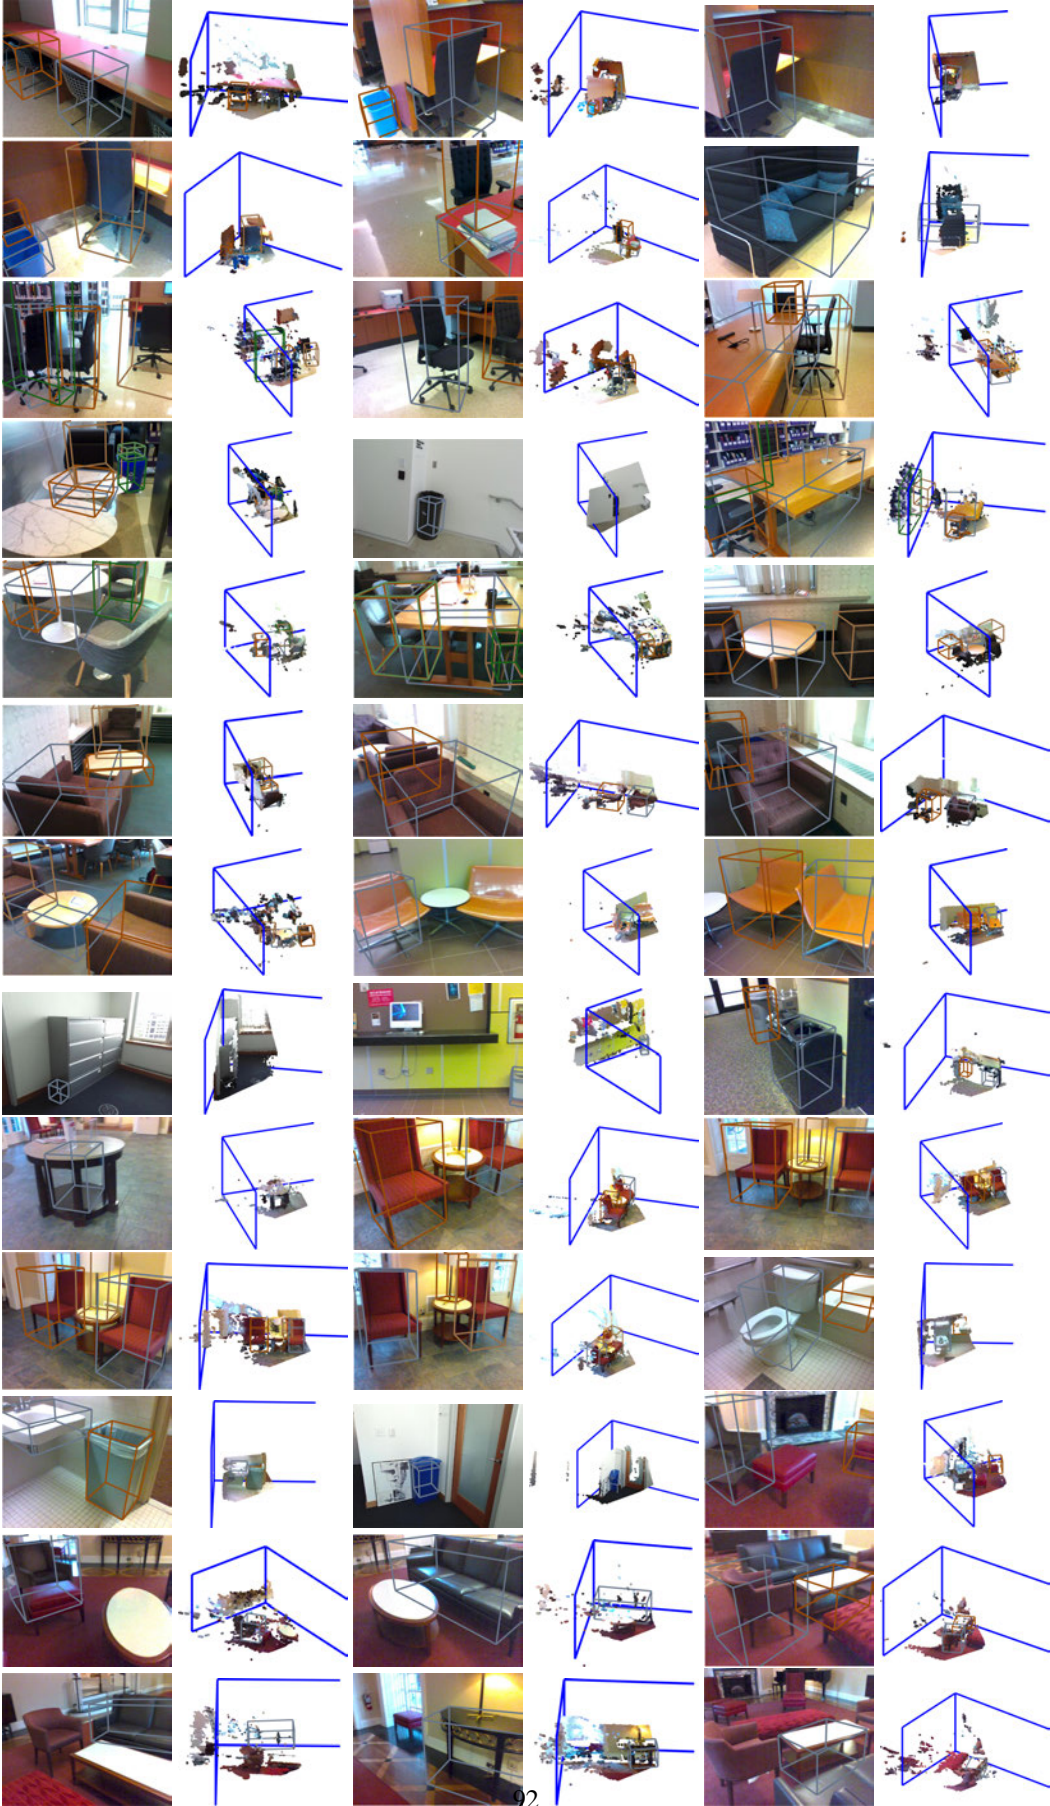

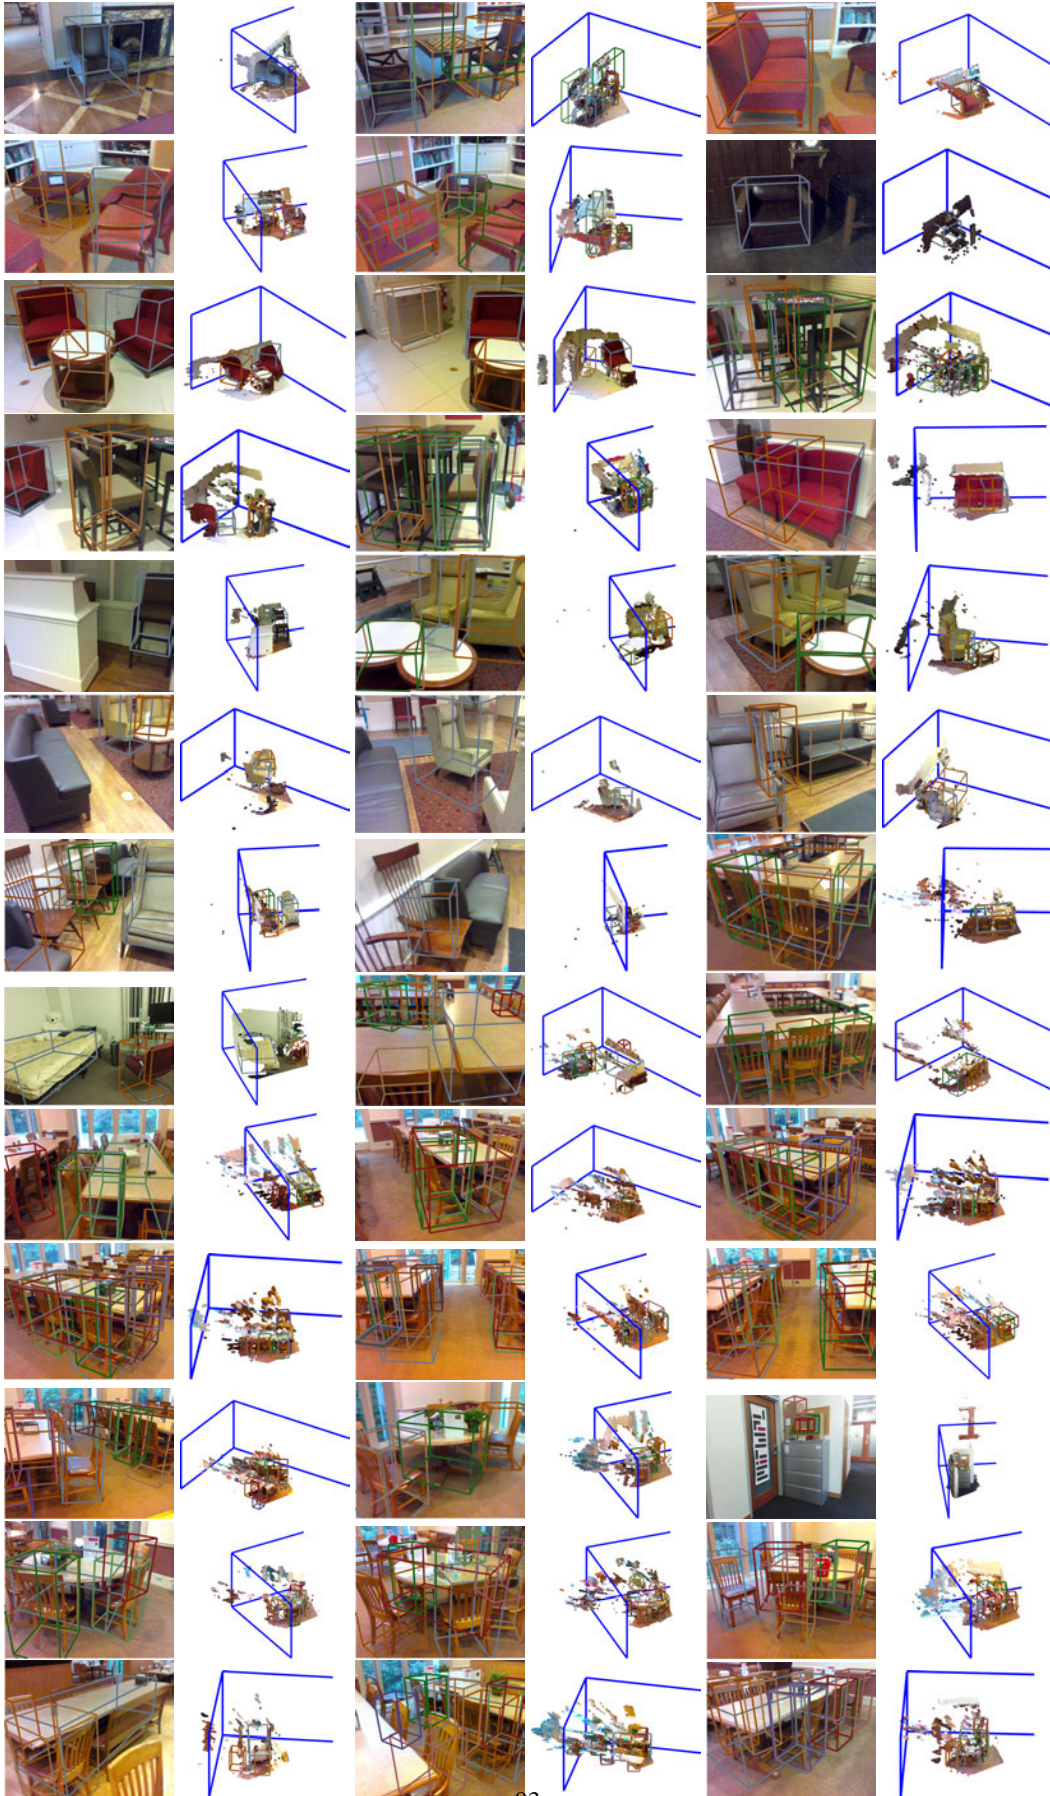

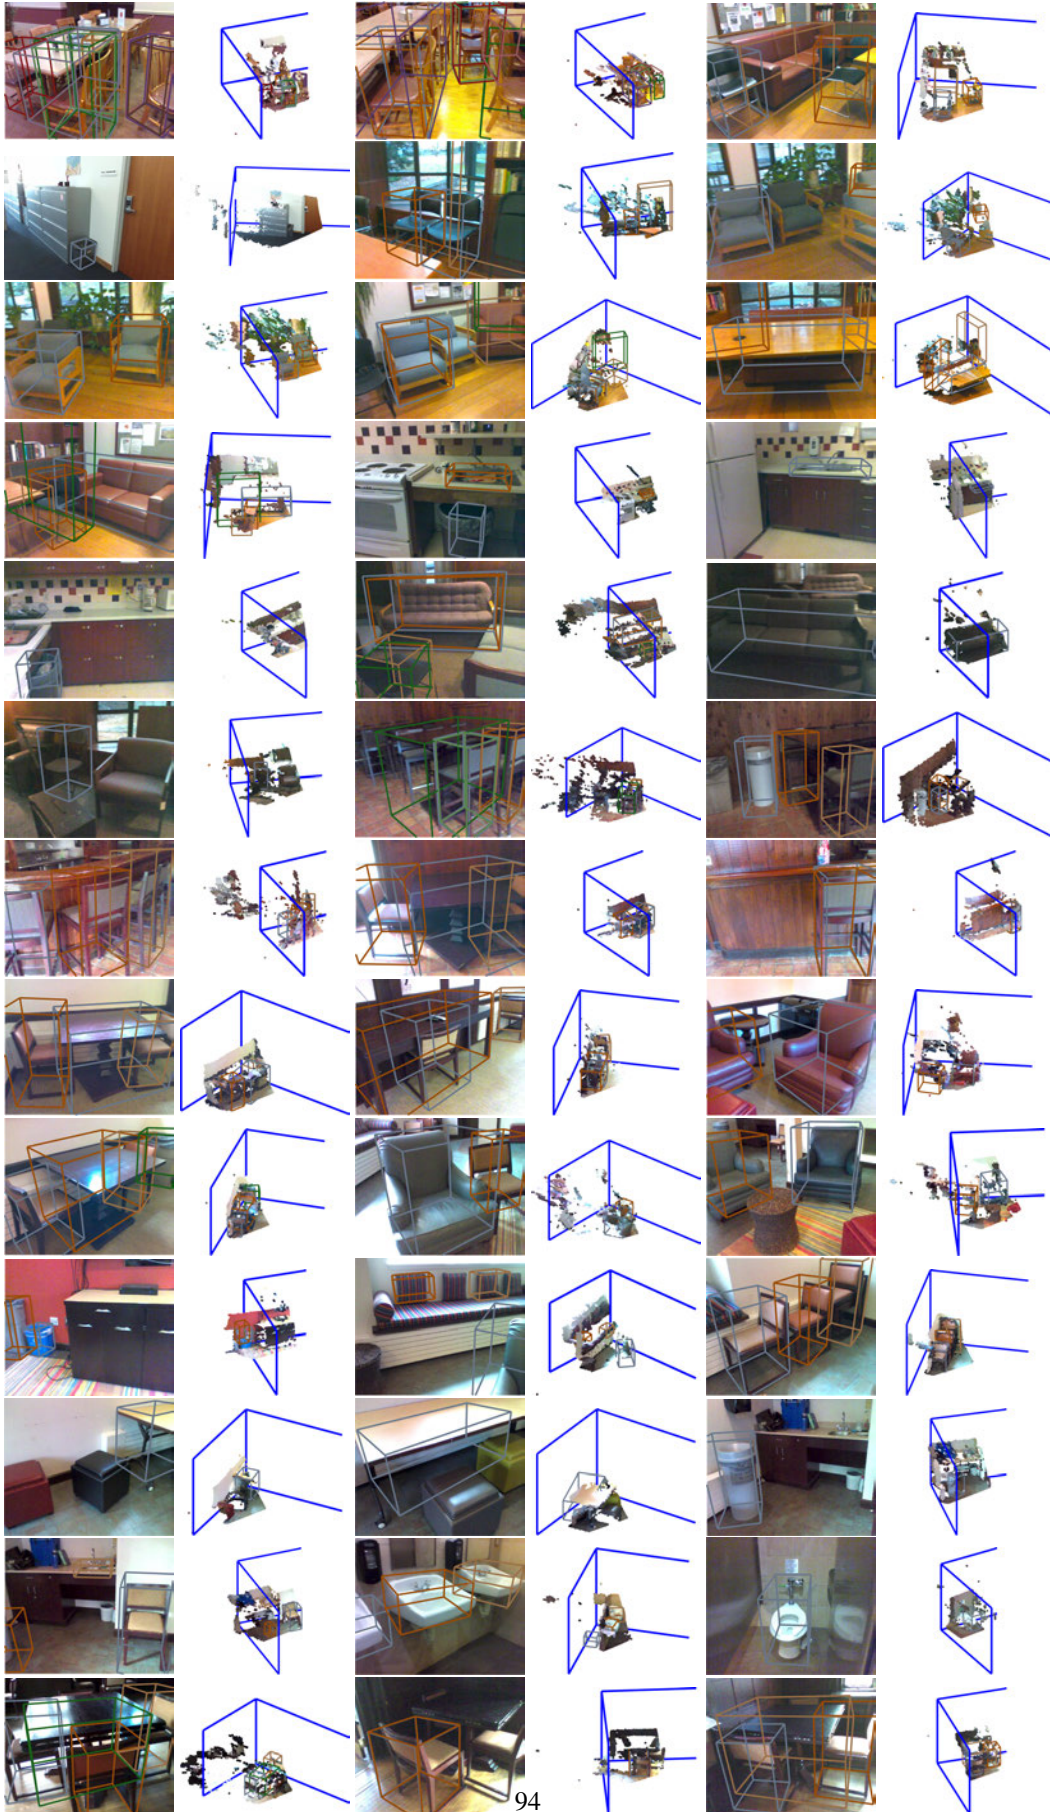

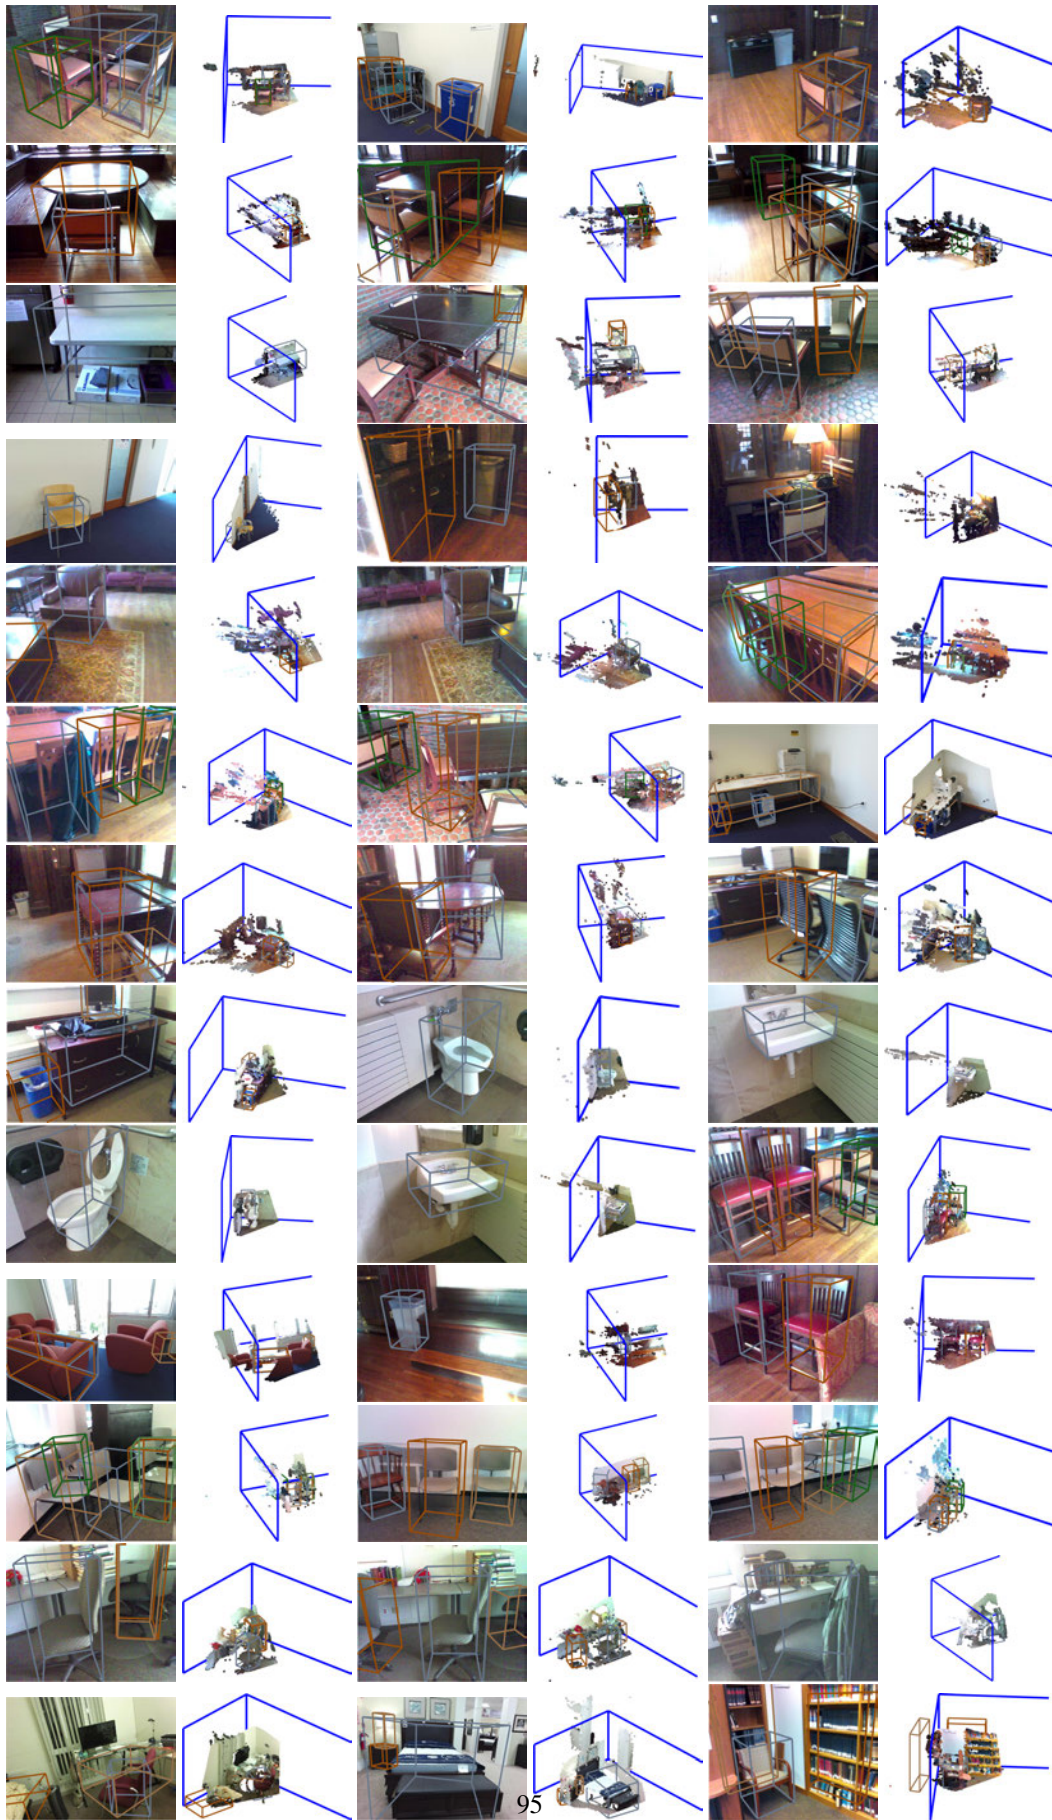

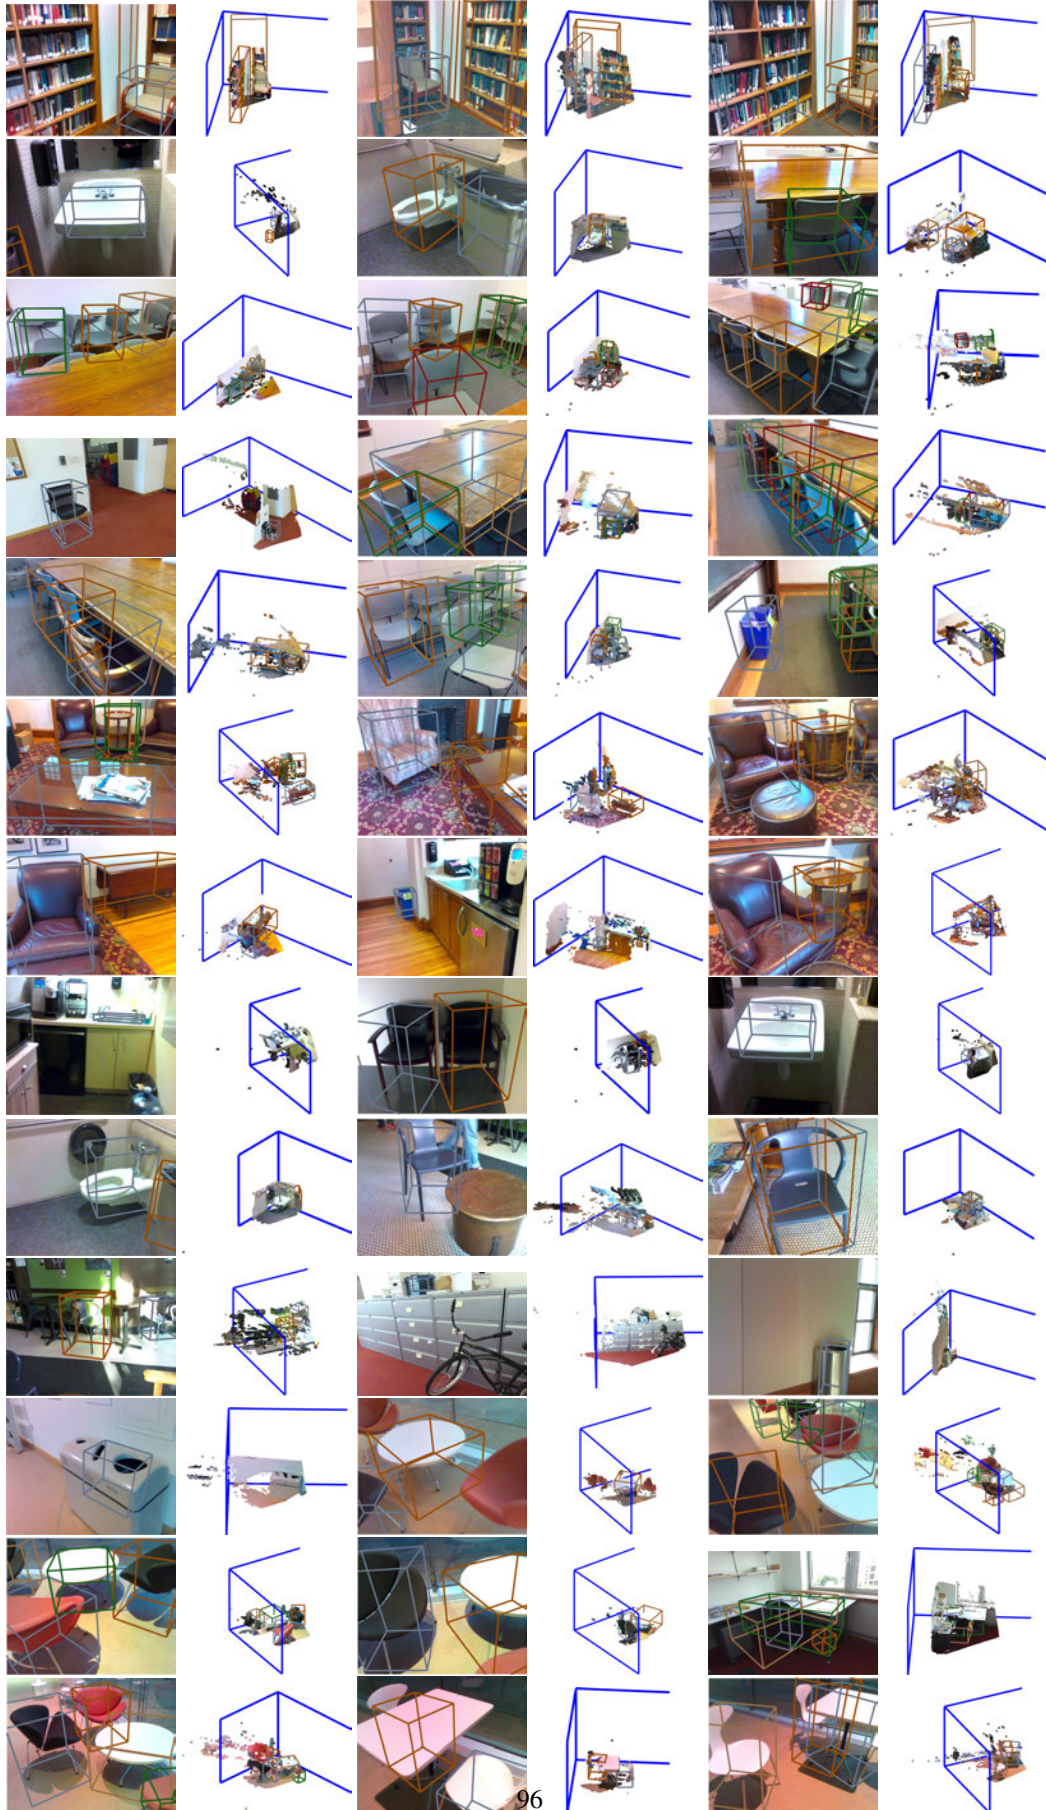



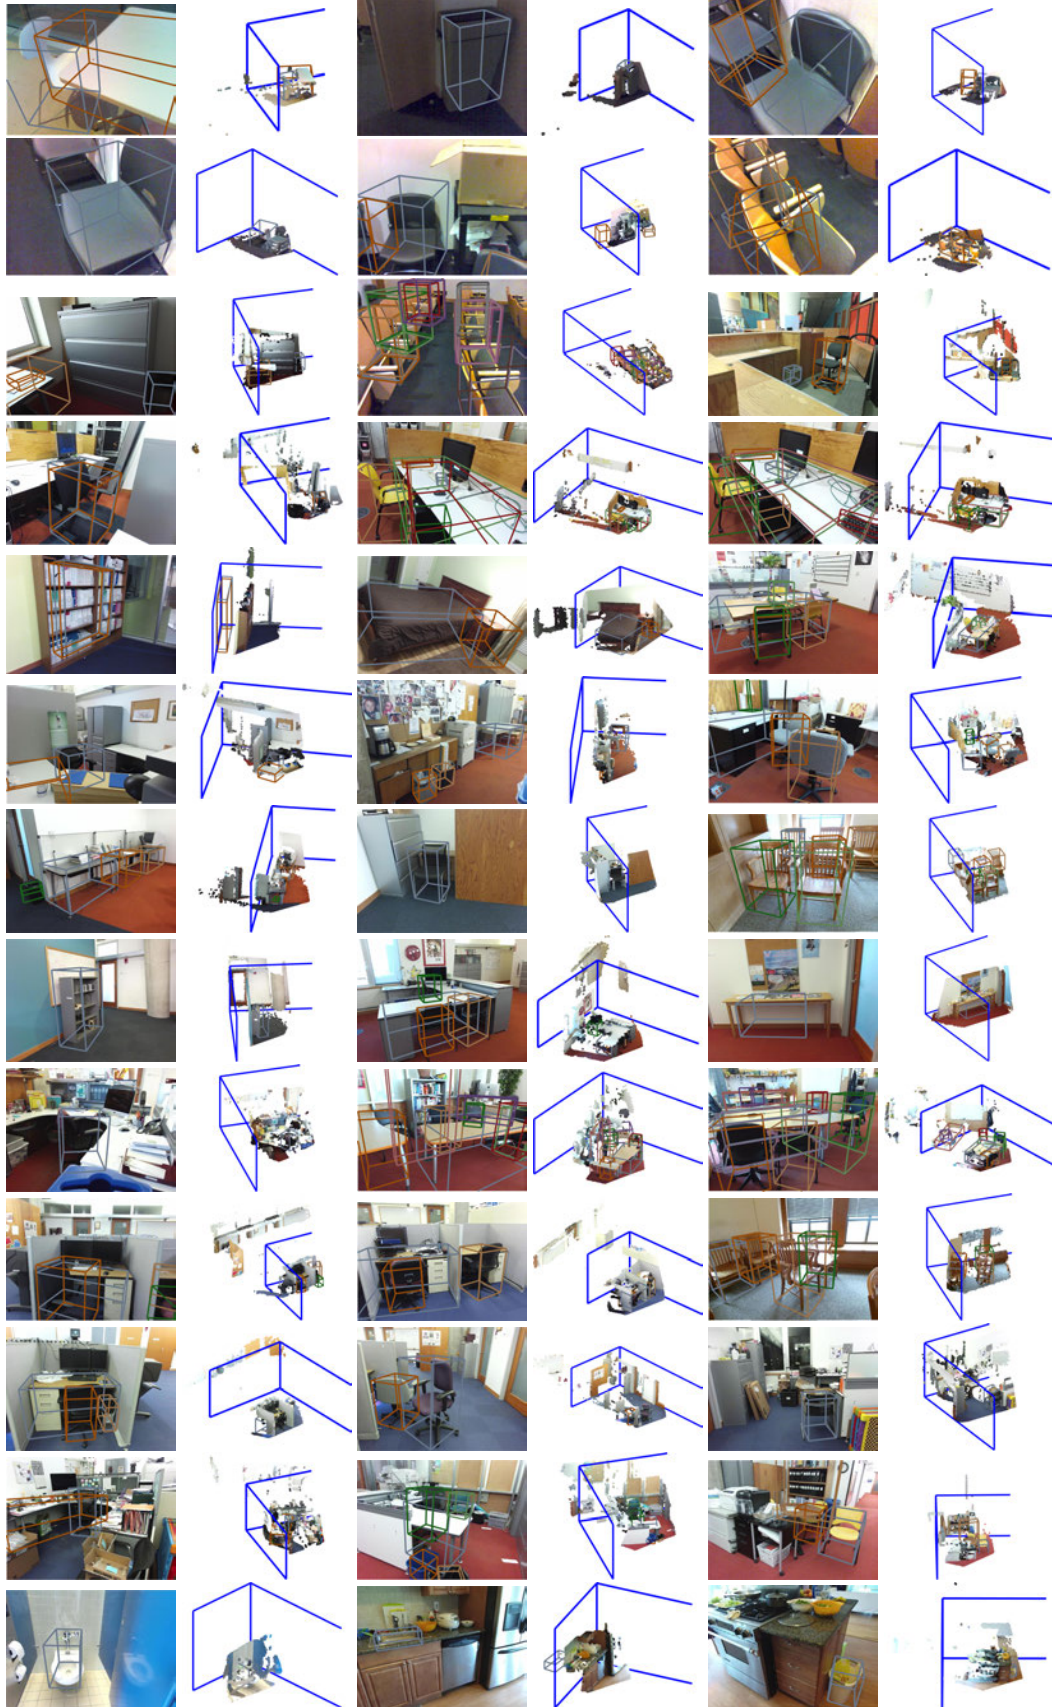

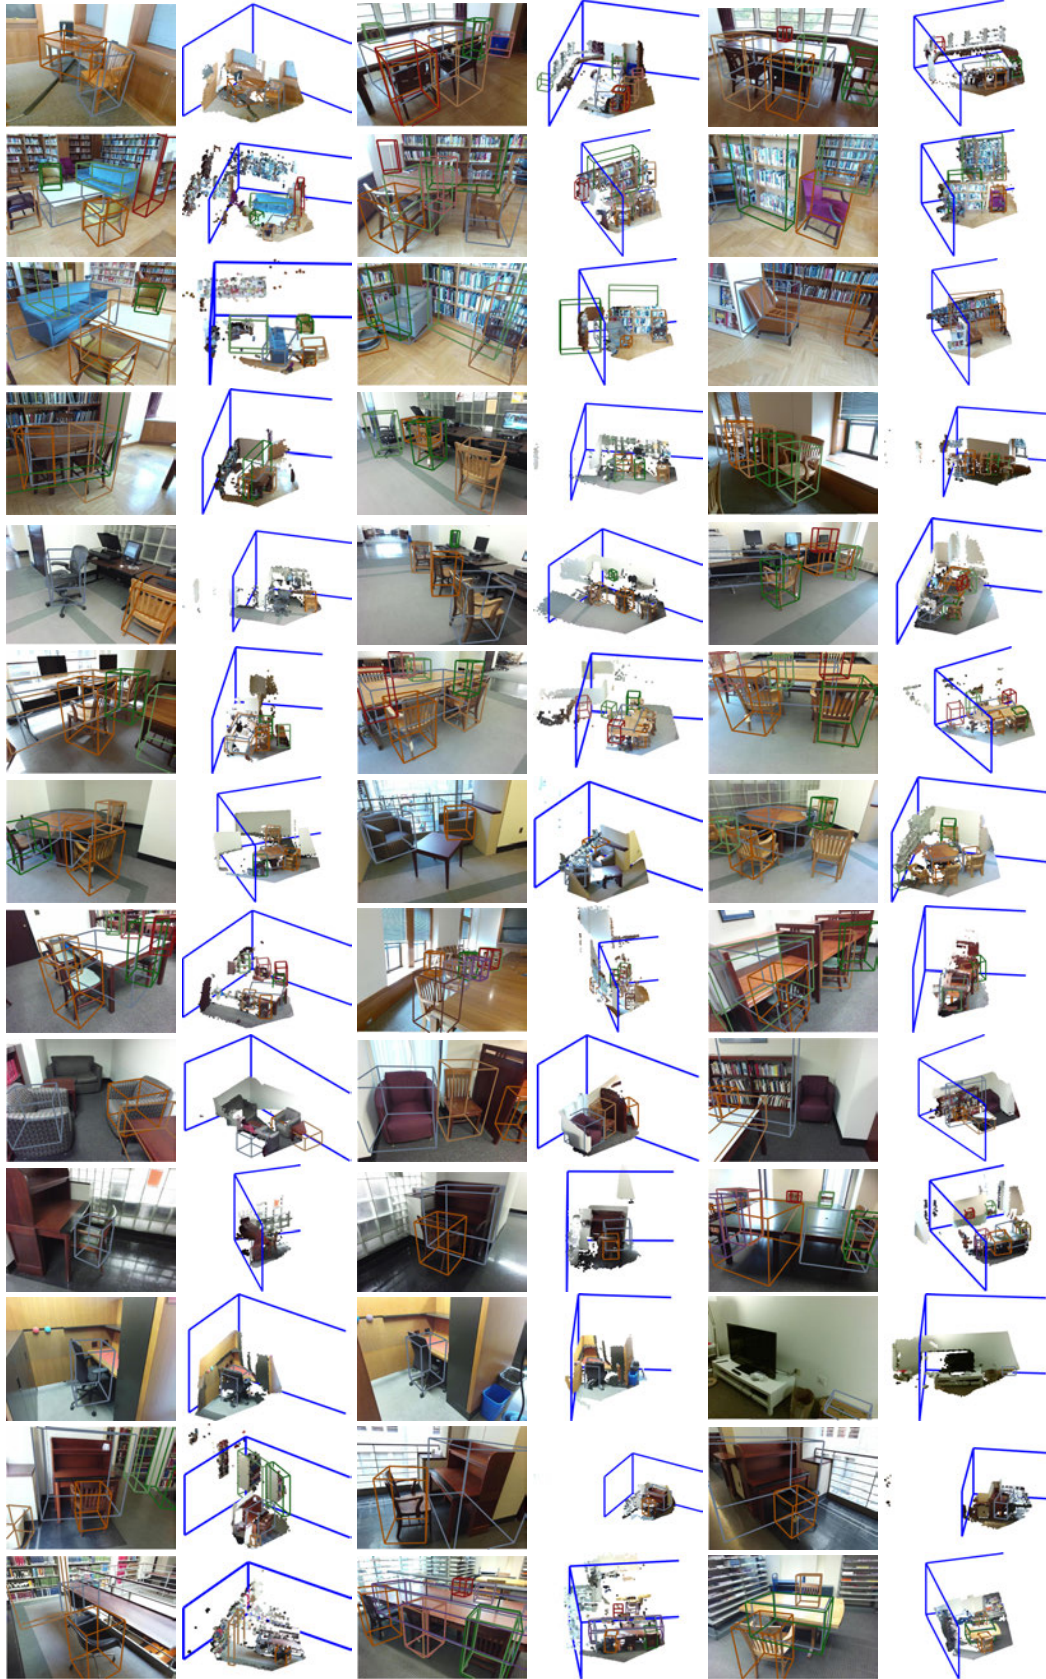

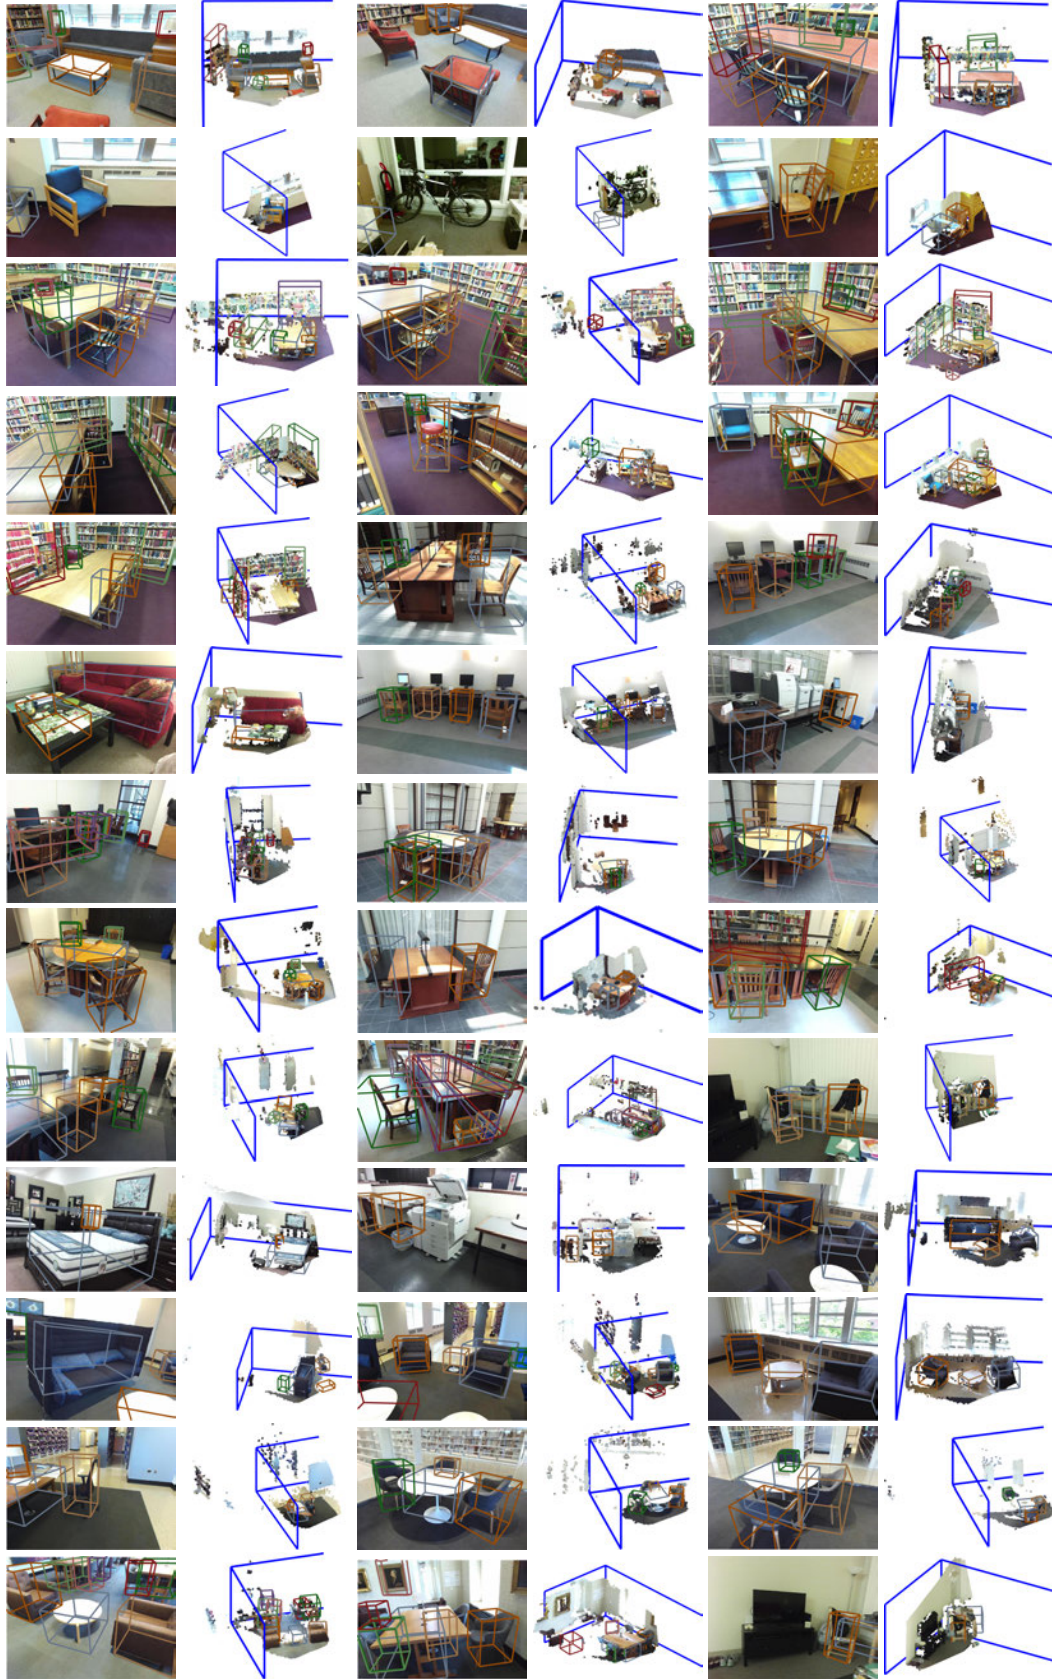

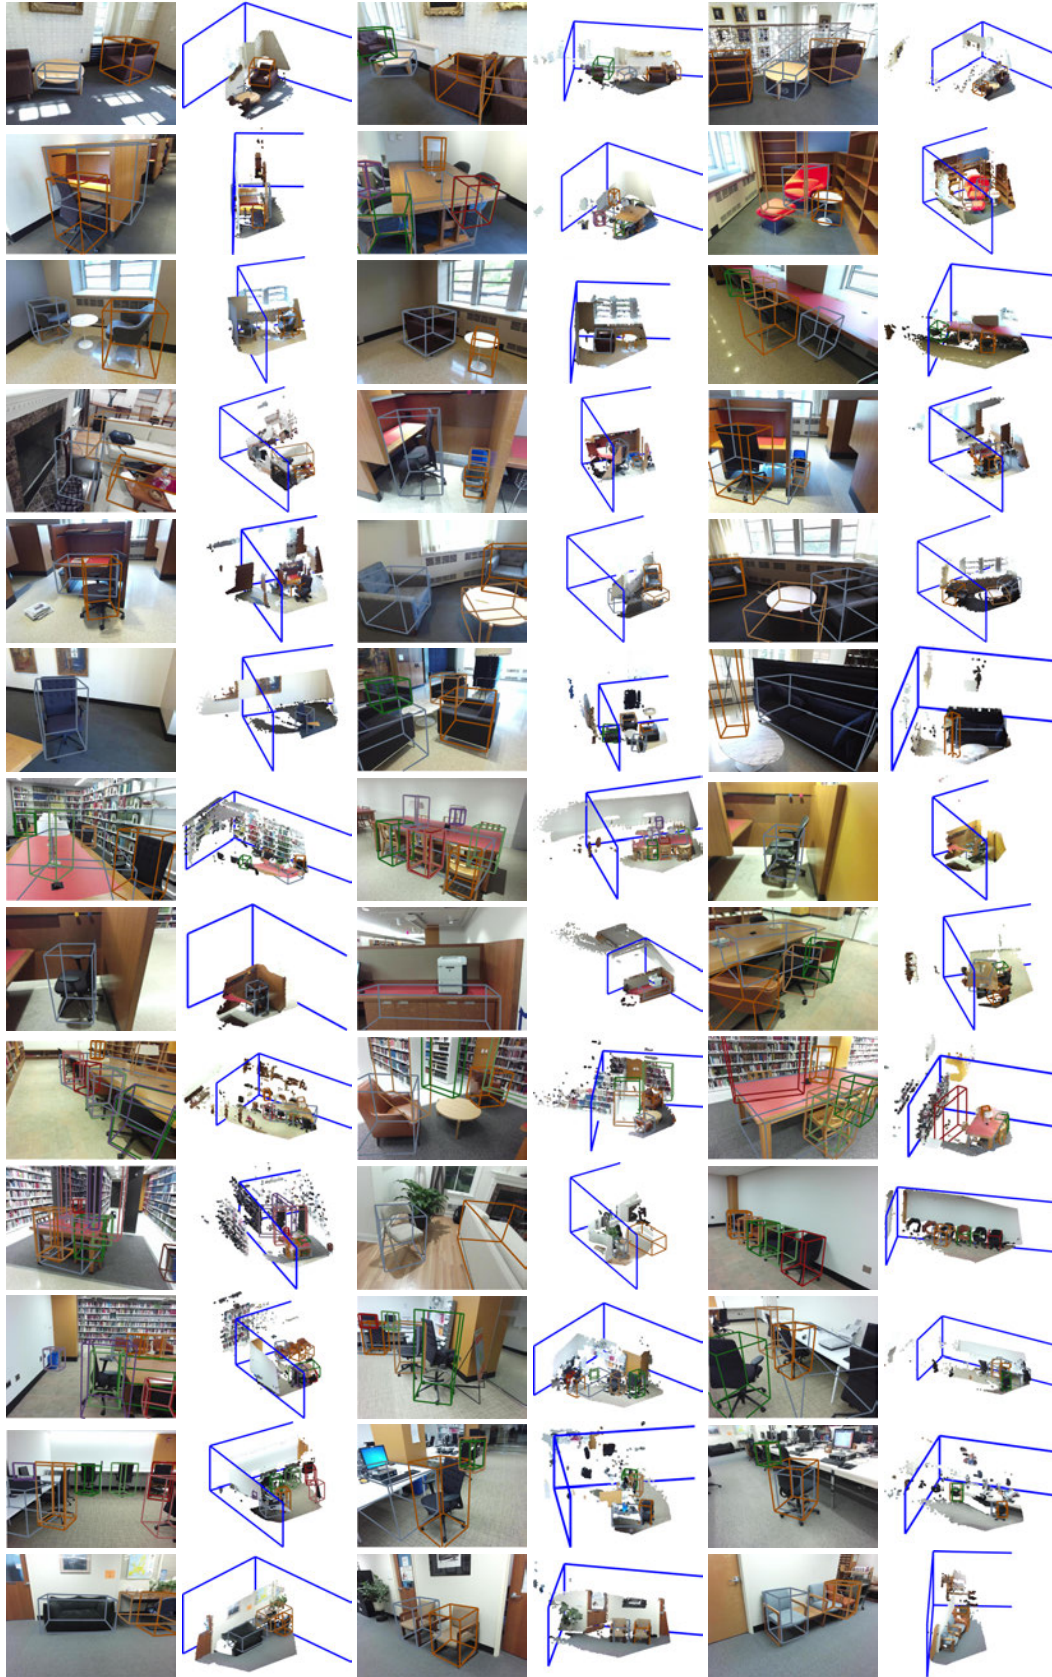

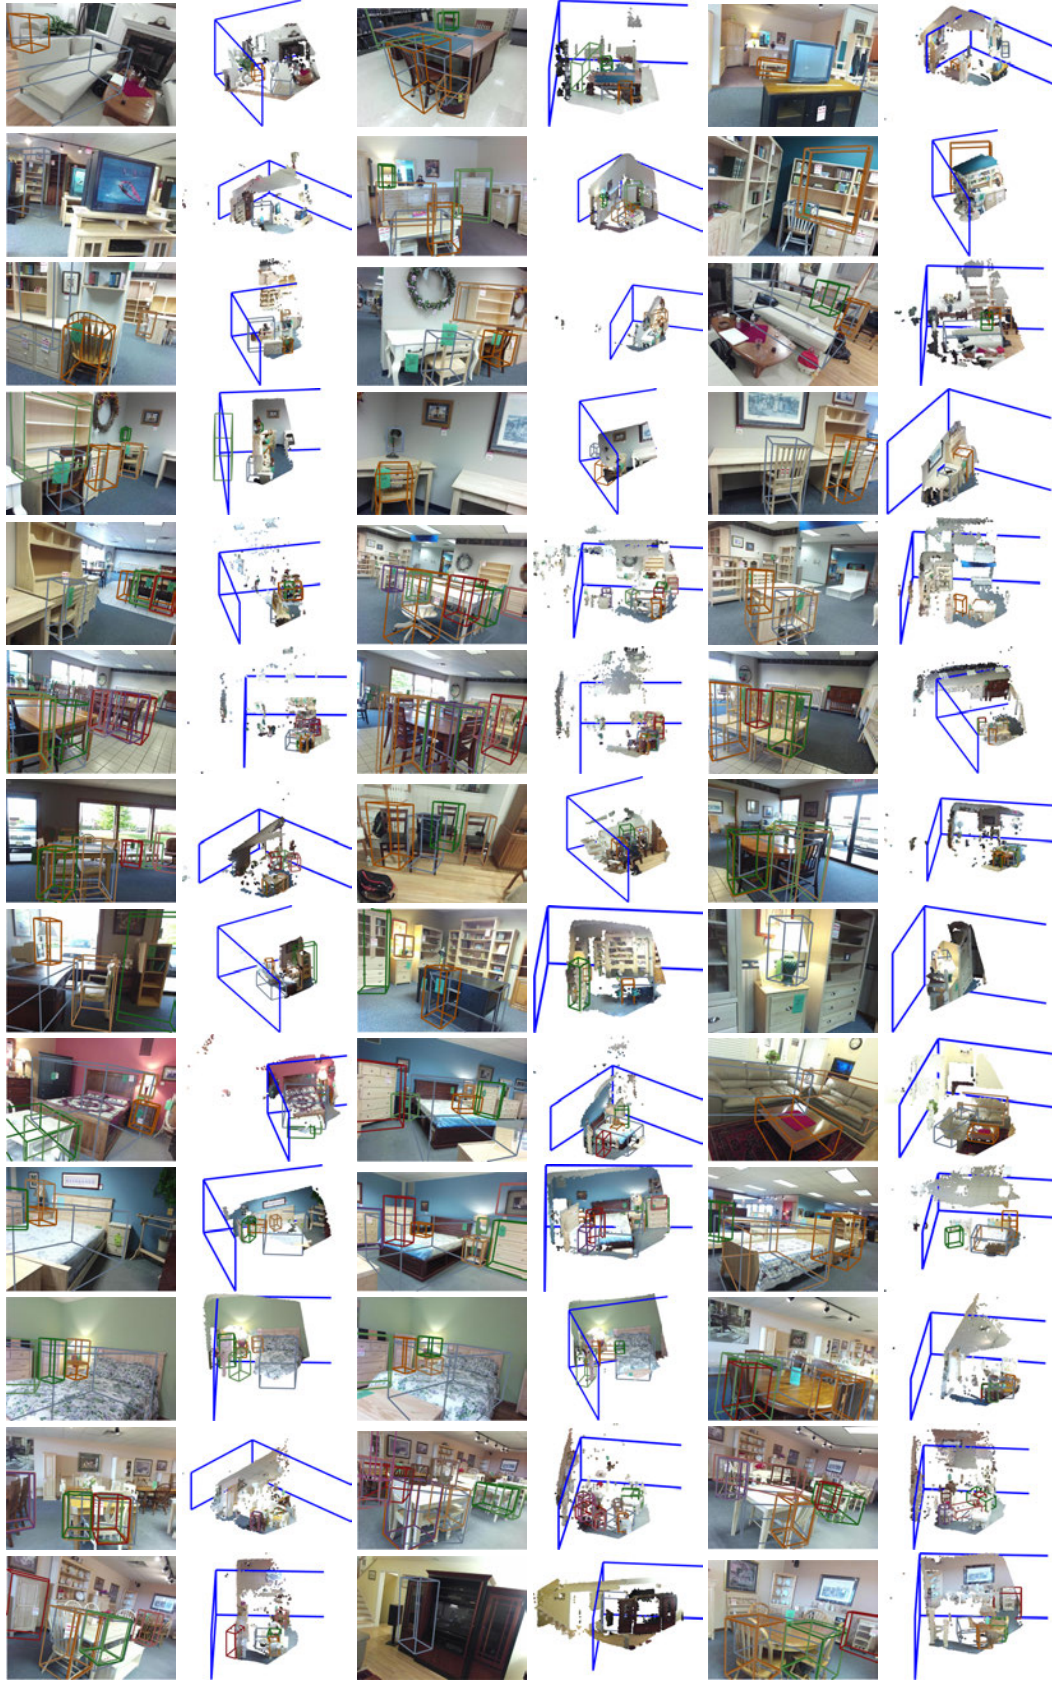

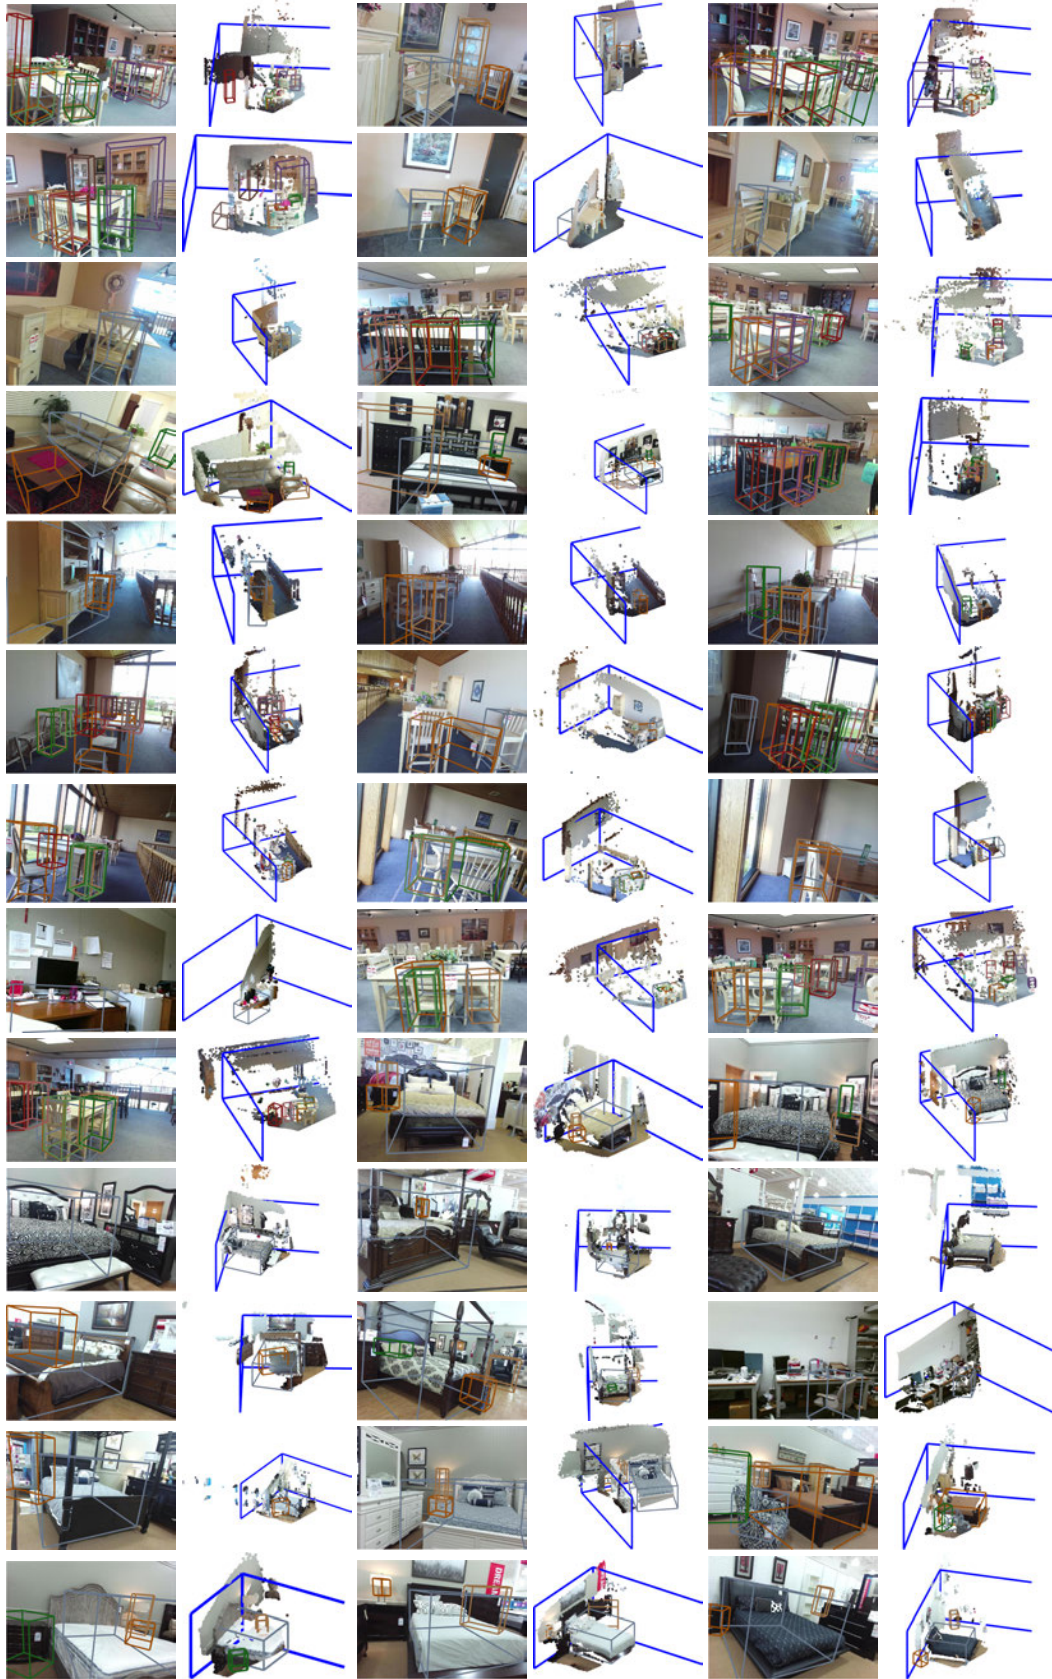

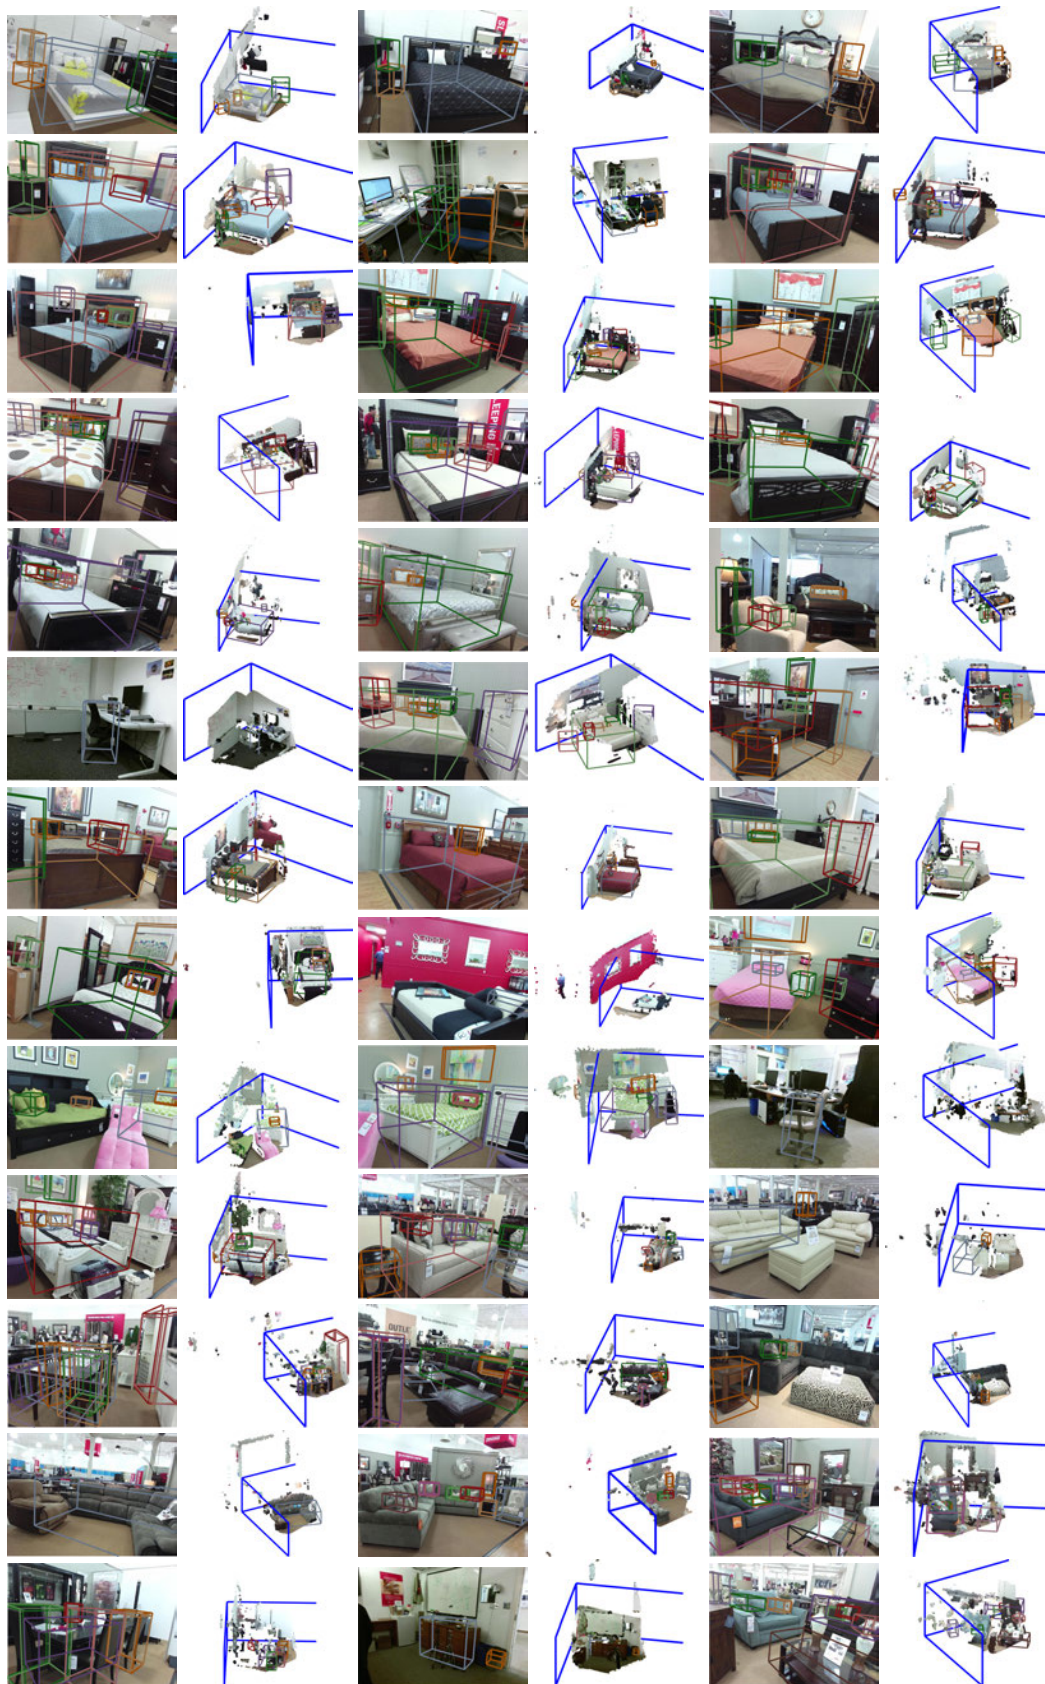

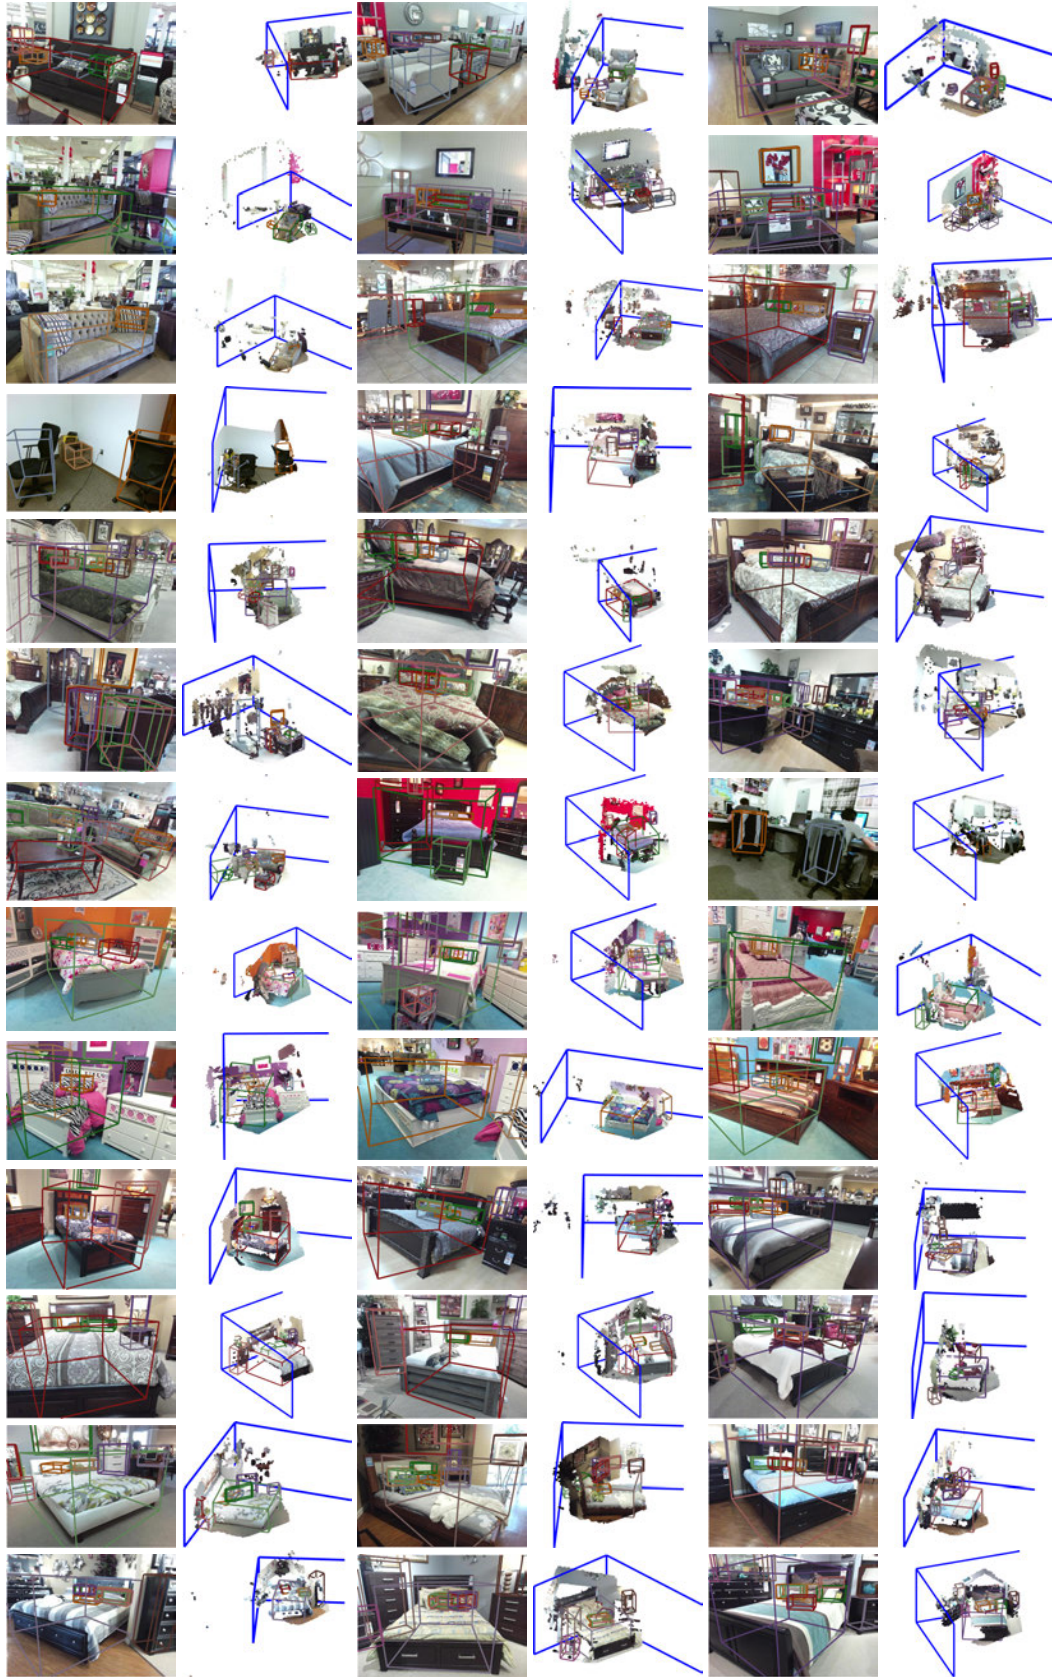



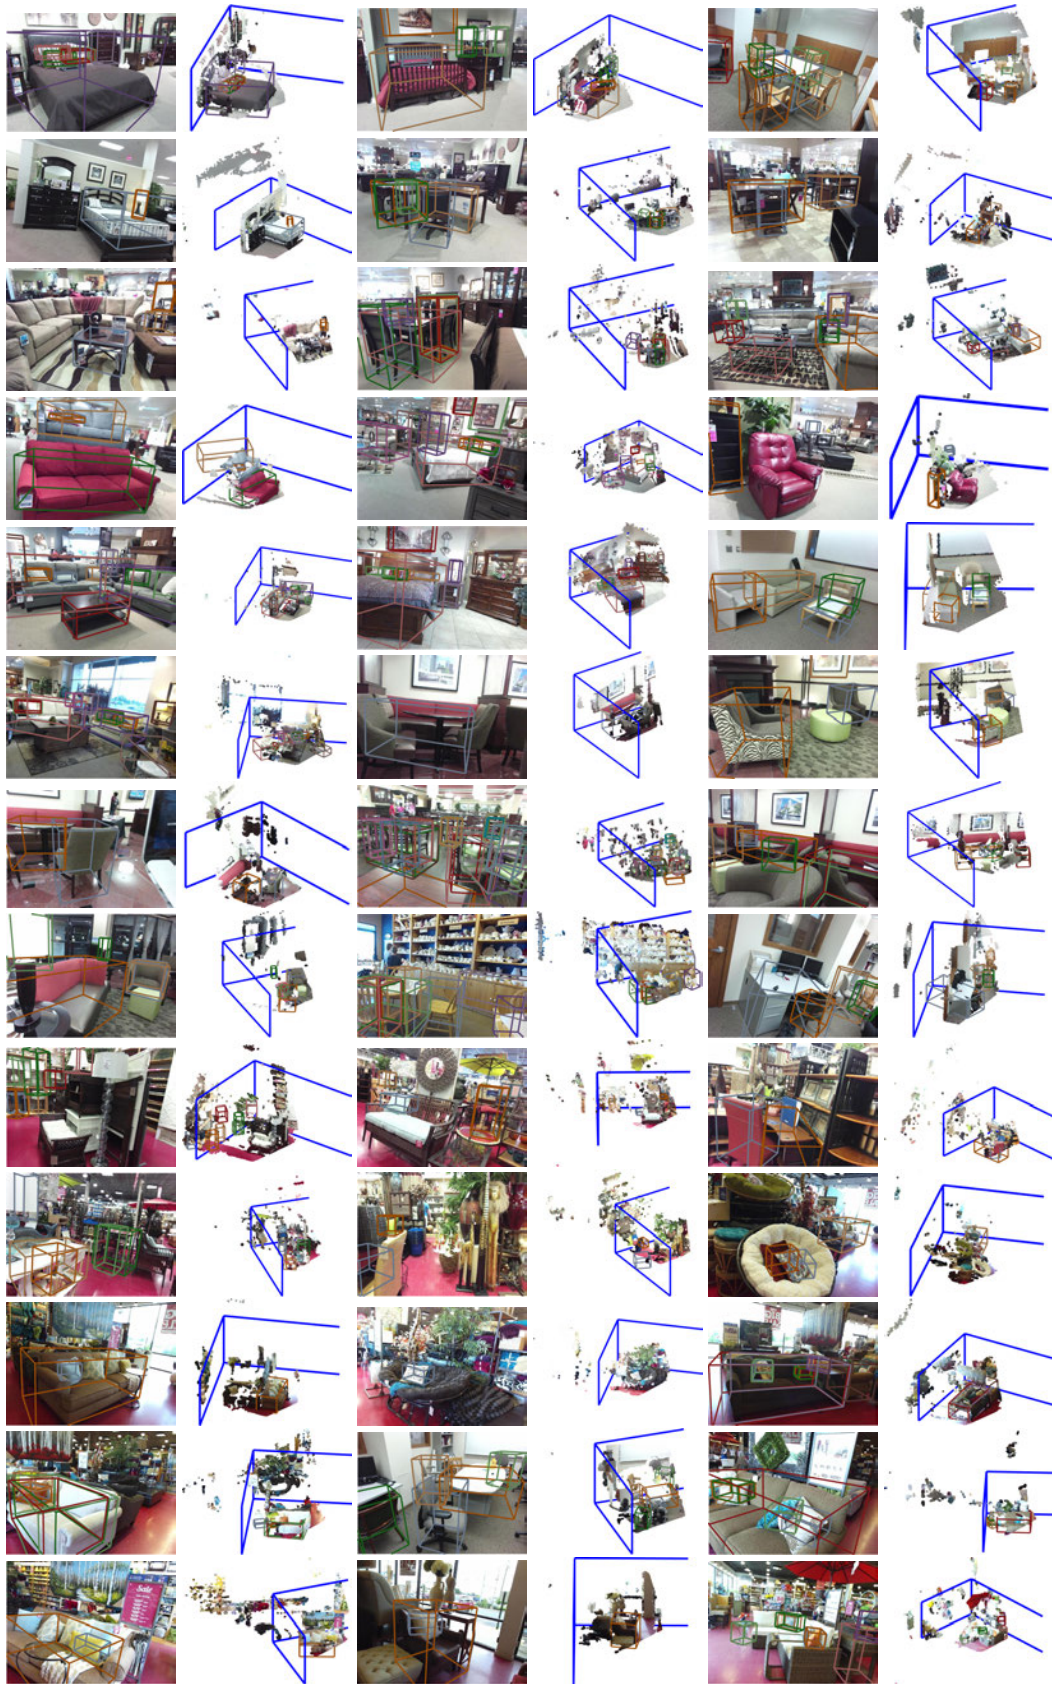

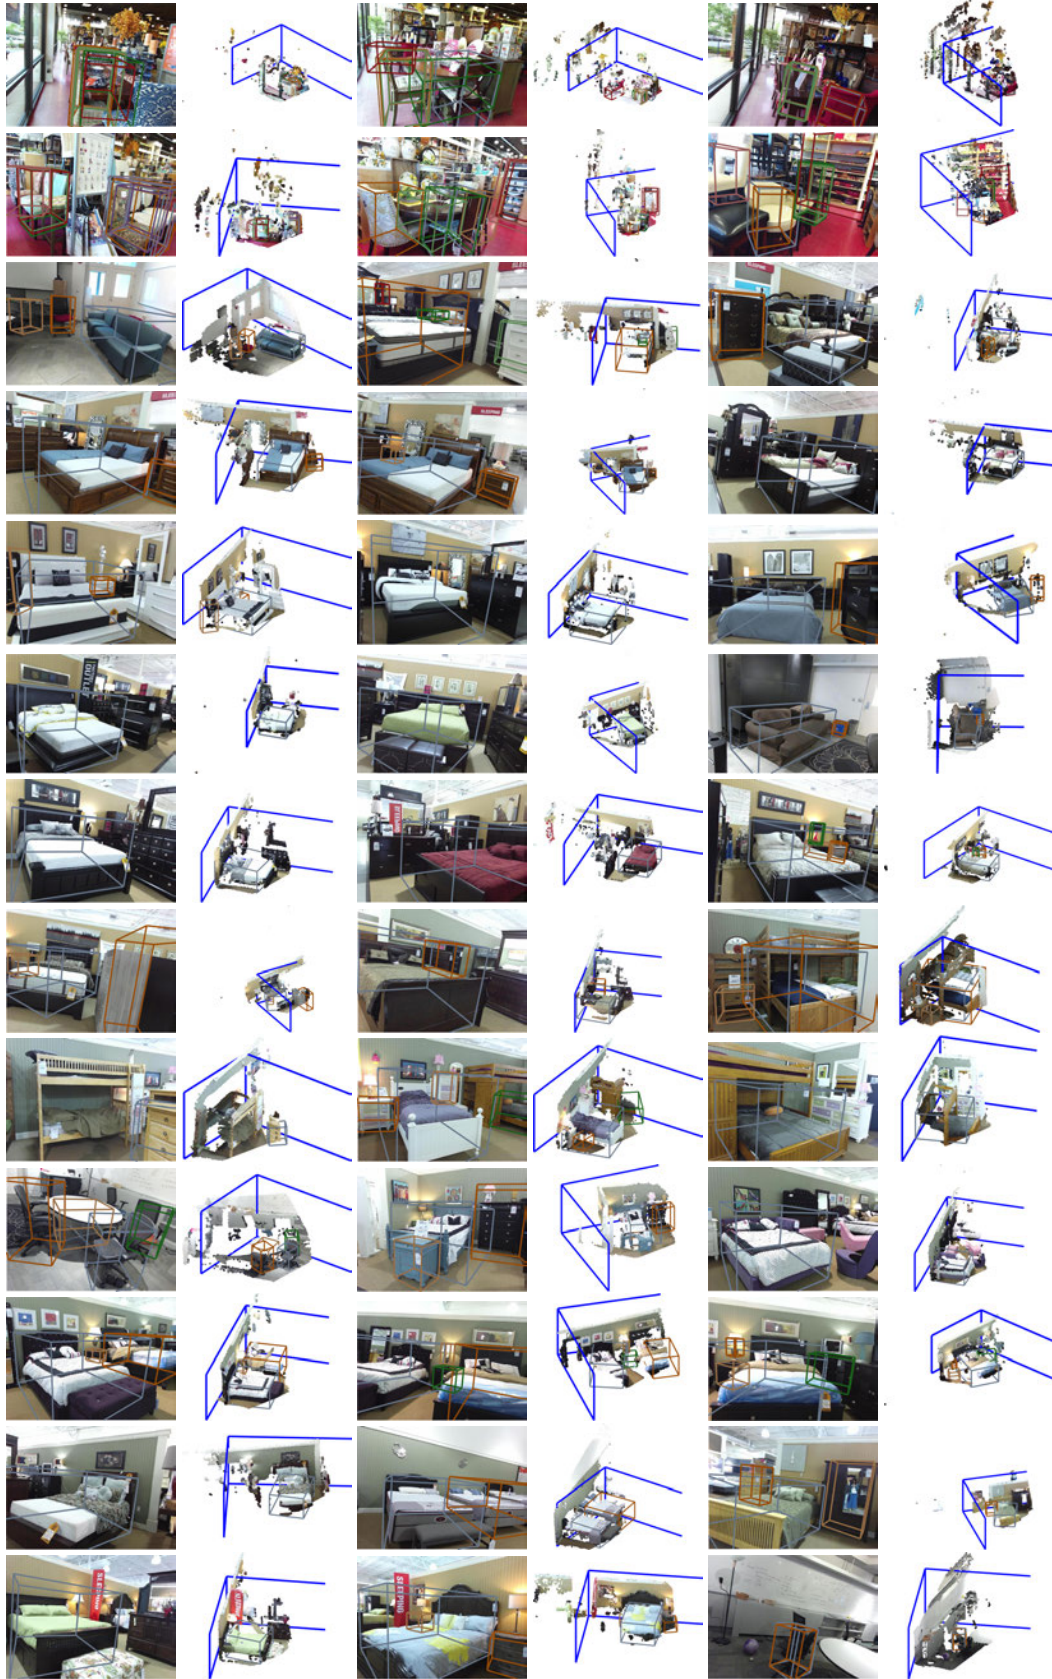

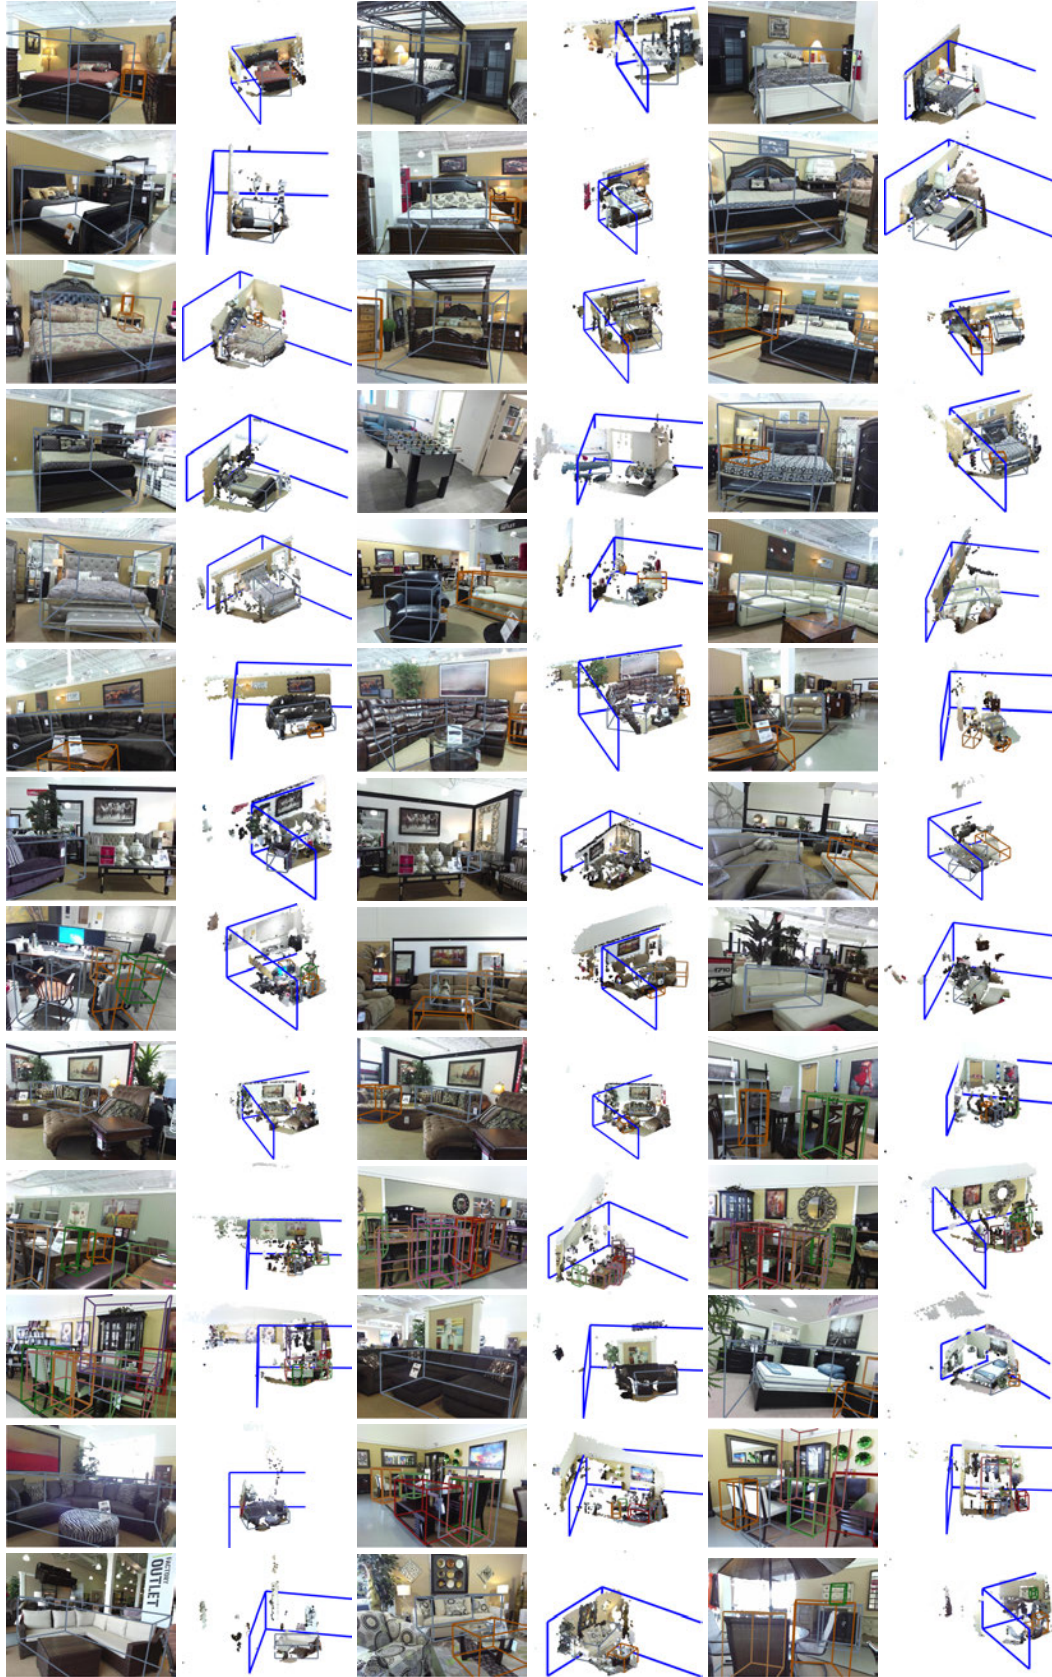

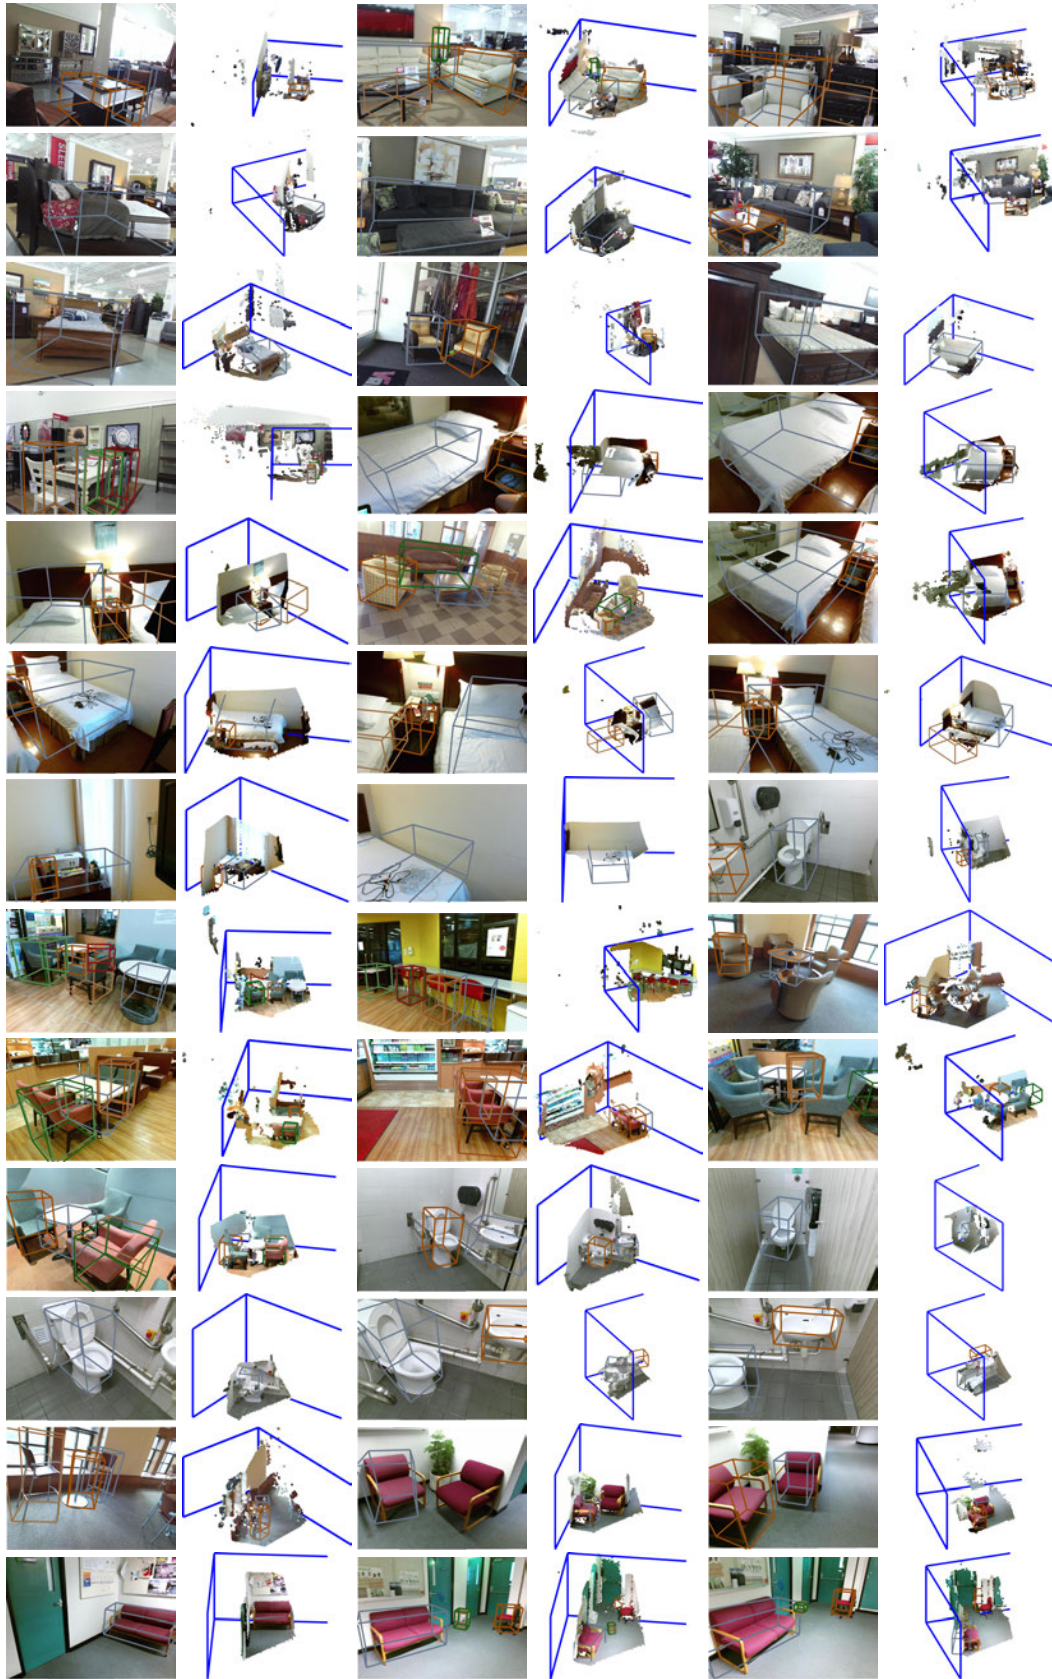

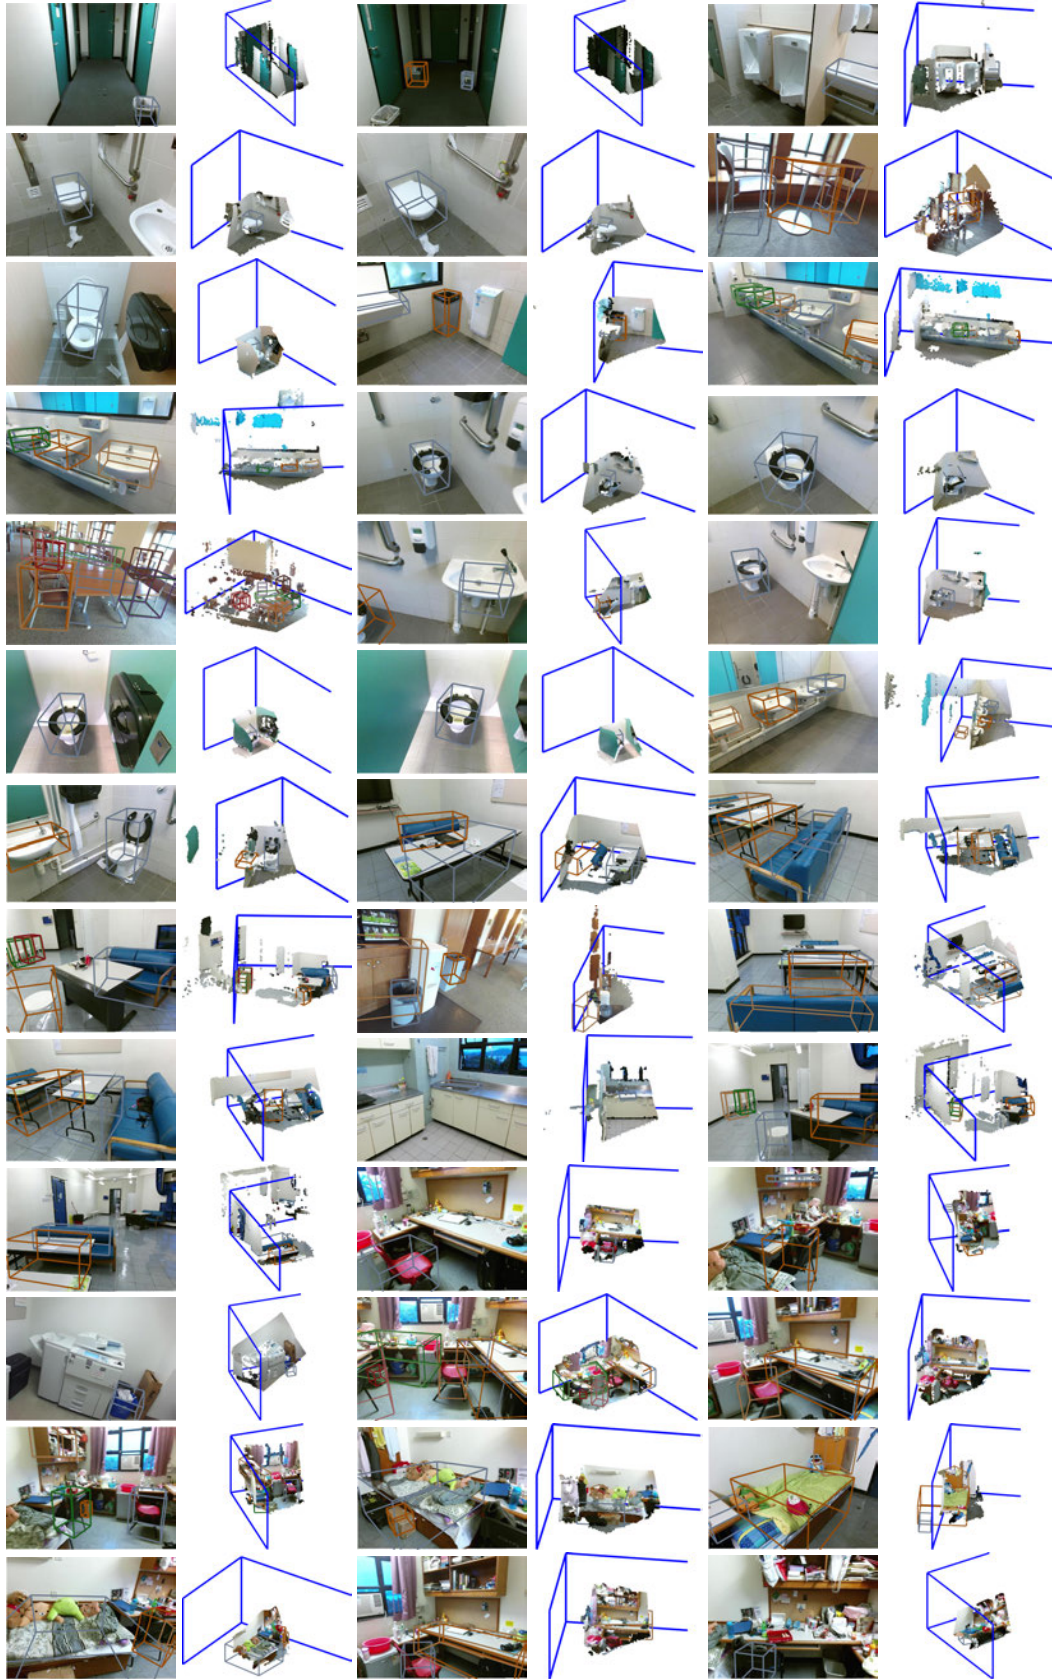

Supplement: Supplementary file [file 82161242827b703e6acf9c726942a1e4-Supplemental.zip]
